# Supplementary material for: Homer3 regulates the establishment of neutrophil polarity
Source: PubMed Central journal article supplement — Mol Biol Cell. 2015 May 1;26(9):1629–39. doi: 10.1091/mbc.E14-07-1197 (PMC4436775; doi:10.1091/mbc.e14-07-1197), 2015-05-01
Supplement: supp_E14-07-1197v1_E14-07-1197CombinedSupMats.pdf [file supp_E14-07-1197v1_E14-07-1197CombinedSupMats.pdf]

# Supplemental Materials

*Molecular Biology of the Cell*

Wu et al.

# Supplementary Figure 1- Schematics for biochemical and genetic screens

## Primary mass spectrometry screen

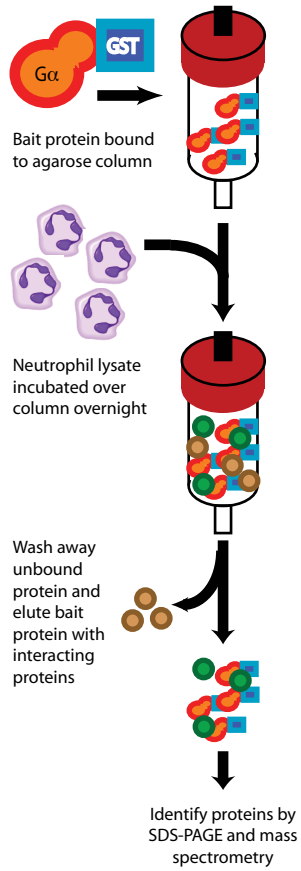

## Secondary migration screen

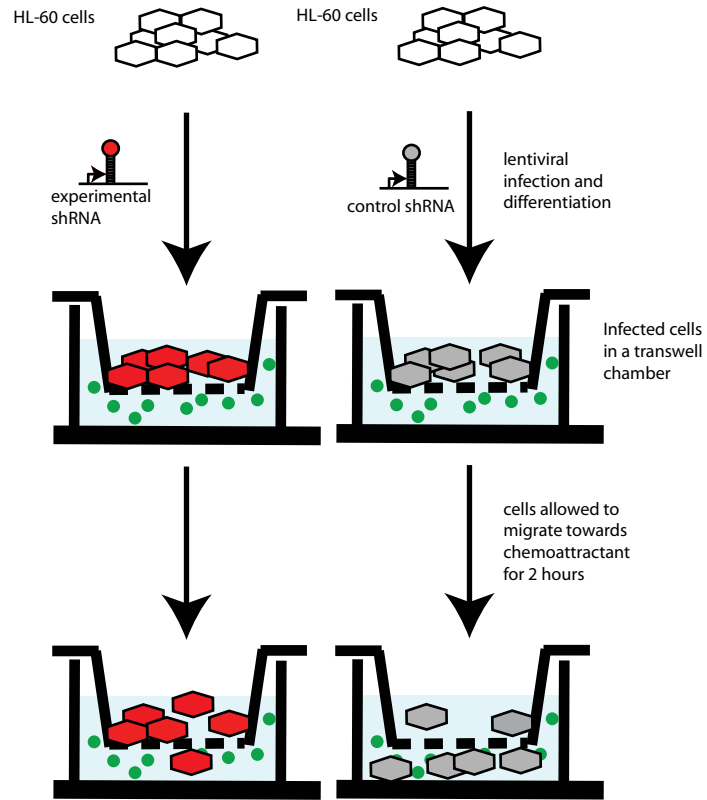

Supplementary figure 2- Homer3 knockdown does not affect Homer1 or Homer2 expression

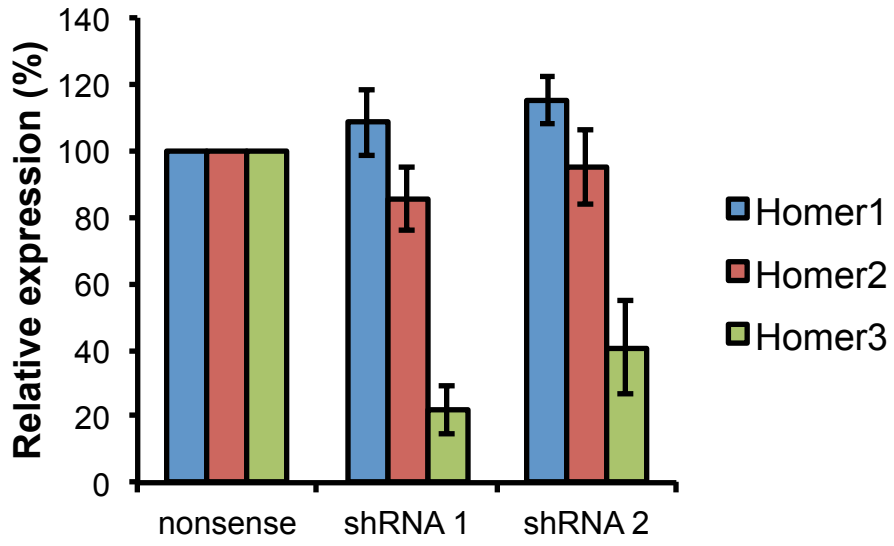

Supplementary figure 3 - Homer3 knockdown does not affect calcium signaling, differentiation, or viability

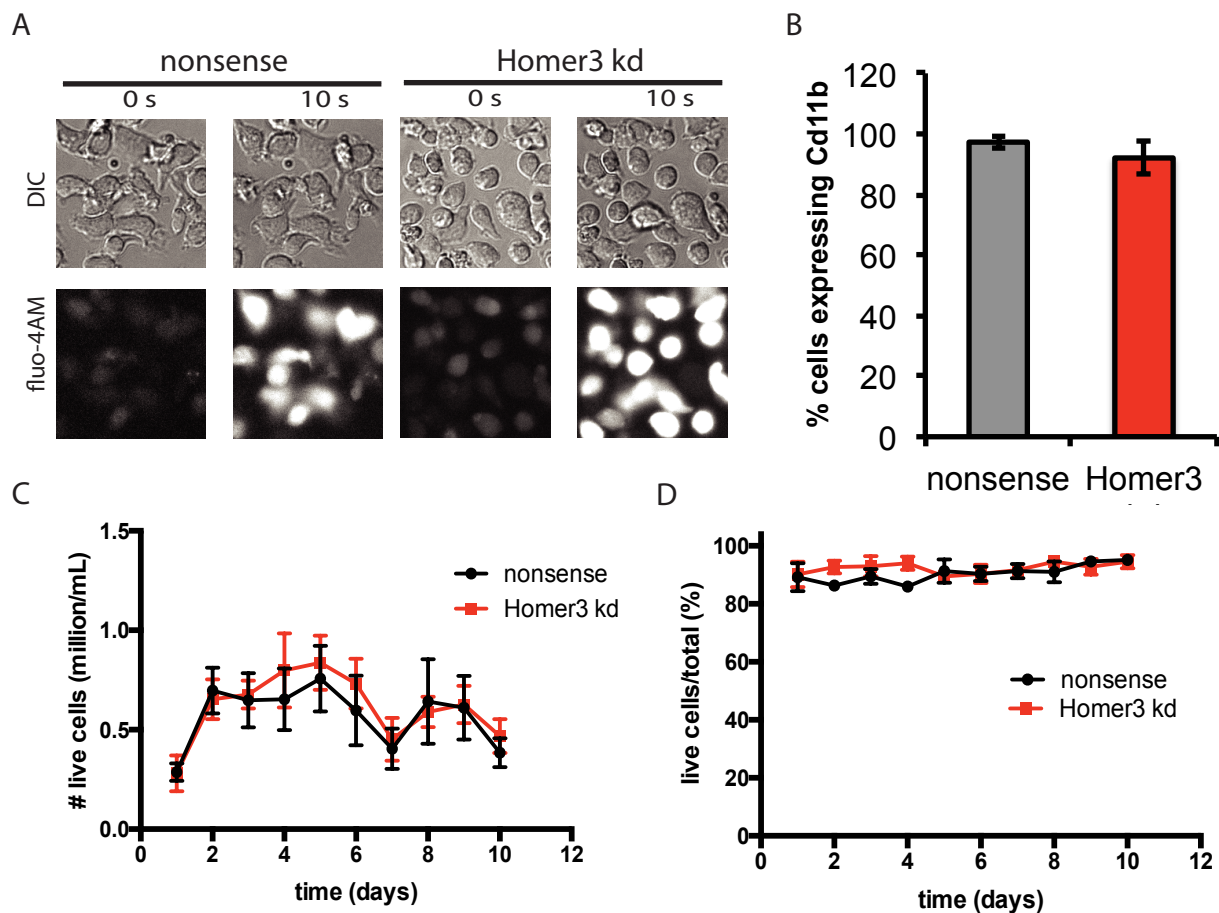

Supplementary figure 4- Homer3 depletion impairs polarized PIP3 accumulation in response to directional chemoattractant cues

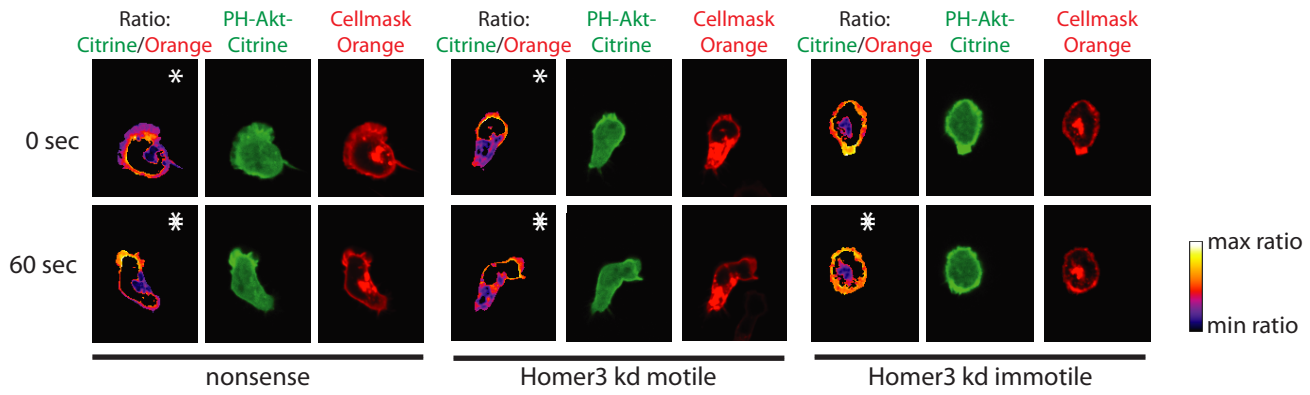

**Figure S1. Schematics for biochemical and genetic screens.** Affinity chromatography/mass spec was used to identify Gai-binding proteins from neutrophil lysate (left), and transwell migration assays (right) was used to test the involvement of potential Gai effectors in neutrophil chemotaxis.

**Figure S2. Homer3 knockdown does not affect calcium signaling, differentiation, or cell viability.** A) Both control (407 of 451 cells, 90%) and Homer3 knockdown (465 of 546 cells, 85%) cells release calcium in response to stimulation with 100 nM fMLP, as assayed by the calcium indicator fluo-4 AM. Representative transmitted light and epifluorescence images of control and Homer3 knockdown cells before and after fMLP stimulation. B) Differentiated control and Homer3 knockdown cells were stained with PE-conjugated antibody for Cd11b and measured for fluorescence via FACS. Threshold for differentiation determined by unstained and undifferentiated controls. C) and D) HL-60 cell lines expressing either Homer3 shRNA or nonsense (control) shRNA were grown as described in *Materials and Methods*. Cells were counted daily using the Countess automated cell counter (Life Technologies) (C), and viability was assessed with trypan blue (D). Cells were then split to a density of 0.3 million/mL each day for ten days. Results represent the mean with standard deviation of three replicates.

**Figure S3. Homer3 knockdown does not affect Homer1 or Homer2 expression.** RNA was isolated from control cells (nonsense shRNA) and HL-60 cell lines expressing one of two different Homer3 shRNAs (shRNA 1 and shRNA 2). Relative expression of Homer1, 2, and 3 was quantified by qRT-PCR using GAPDH as a reference gene. Results represent the mean with standard deviation of three replicates.

**Figure S4. Homer3 depletion impairs polarized PIP3 accumulation in response to directional chemoattractant cues.** Differentiated HL-60 cells (nonsense shRNA or Homer3 shRNA) expressing PH-Akt-Citrine (green) and labeled with CellMask Orange (red) were stimulated with fMLP released from a micropipette. Ratiometric images (PH-Akt-Citrine versus CellMask Orange) are also shown. Asterisk represents the source of the fMLP.

**Supplementary Tables 1-4. Spectral counts in mass spectrometry screen.** Spectral counts (total and unique) for each mass spectrometry run are shown, calculated as described in *Materials and Methods*. Each column of counts represents one run with the given bait.

| Identified Proteins (670)                                                                                                                 | Accession Number             | Molecular W | GST_AluFL | GST_GDP | Galpai_AluF | Galpai_GDP |
|-------------------------------------------------------------------------------------------------------------------------------------------|------------------------------|-------------|-----------|---------|-------------|------------|
| GST-part                                                                                                                                  | GST                          | 26 kDa      | 1763      | 2301    | 1148        | 940        |
| Guanine nucleotide binding protein (G protein), alpha inhibiting activity polypeptide 2, isoform CRA_e OS=Homo sapiens GN=GNAI2 PE=2 SV=1 | tr B3KTZ0 B3KTZ0_HUMAN (+2)  | 39 kDa      | 21        | 41      | 1341        | 957        |
| Trypsin precursor                                                                                                                         | gi 136429 sp P00761 TRYP_PIG | 24 kDa      | 255       | 393     | 235         | 310        |
| Guanine nucleotide-binding protein G(t) subunit alpha-3 OS=Homo sapiens GN=GNAT3 PE=2 SV=2                                                | sp A8MTJ3 GNAT3_HUMAN (+4)   | 40 kDa      | 0         | 0       | 201         | 151        |
| Actin, alpha skeletal muscle OS=Homo sapiens GN=ACTA1 PE=3 SV=2                                                                           | tr A6NL76 A6NL76_HUMAN (+1)  | 32 kDa      | 194       | 61      | 262         | 34         |
| Glutathione S-transferase P OS=Homo sapiens GN=GSTP1 PE=3 SV=1                                                                            | tr A8MX94 A8MX94_HUMAN       | 19 kDa      | 52        | 148     | 170         | 179        |
| Filamin-A OS=Homo sapiens GN=FLNA PE=4 SV=2                                                                                               | tr E9PHF0 E9PHF0_HUMAN       | 83 kDa      | 129       | 4       | 322         | 11         |
| Actinin alpha 1 isoform 3 OS=Homo sapiens GN=ACTN1 PE=2 SV=1                                                                              | tr B7TY16 B7TY16_HUMAN (+3)  | 107 kDa     | 107       | 8       | 326         | 4          |
| Actin, cytoplasmic 1 (Fragment) OS=Homo sapiens GN=ACTB PE=3 SV=1                                                                         | tr E7EVS6 E7EVS6_HUMAN (+13) | 18 kDa      | 187       | 15      | 59          | 71         |
| Heat shock cognate 71 kDa protein OS=Homo sapiens GN=HSPA8 PE=3 SV=1                                                                      | tr E9PKE3 E9PKE3_HUMAN (+7)  | 69 kDa      | 106       | 101     | 82          | 38         |
| Filamin-A (Fragment) OS=Homo sapiens GN=FLNA PE=4 SV=2                                                                                    | tr F8WE98 F8WE98_HUMAN       | 67 kDa      | 73        | 7       | 175         | 9          |
| Tubulin beta chain OS=Homo sapiens GN=TUBB PE=3 SV=1                                                                                      | tr F8VYX6 F8VYX6_HUMAN (+14) | 48 kDa      | 96        | 3       | 114         | 75         |
| Coronin OS=Homo sapiens GN=CORO1A PE=3 SV=1                                                                                               | tr H3BRY3 H3BRY3_HUMAN (+5)  | 43 kDa      | 22        | 121     | 46          | 38         |
| Ras GTPase-activating-like protein IQGAP1 OS=Homo sapiens GN=IQGAP1 PE=4 SV=1                                                             | tr H0YLE8 H0YLE8_HUMAN       | 125 kDa     | 73        | 0       | 186         | 5          |
| Ras GTPase-activating protein 3 OS=Homo sapiens GN=RASA3 PE=2 SV=1                                                                        | tr F8WGX8 F8WGX8_HUMAN       | 92 kDa      | 4         | 0       | 159         | 19         |
| Carbonyl reductase 1, isoform CRA_c OS=Homo sapiens GN=CBR1 PE=2 SV=1                                                                     | tr B4DFK7 B4DFK7_HUMAN (+2)  | 19 kDa      | 54        | 40      | 47          | 30         |
| Plastin-3 OS=Homo sapiens GN=PLS3 PE=2 SV=1                                                                                               | tr B4DGB4 B4DGB4_HUMAN (+5)  | 69 kDa      | 50        | 11      | 75          | 2          |
| Pyruvate kinase (Fragment) OS=Homo sapiens GN=PKM PE=3 SV=1                                                                               | tr H3BTN5 H3BTN5_HUMAN (+5)  | 53 kDa      | 100       | 17      | 7           | 11         |
| Actin-related protein 2 OS=Homo sapiens GN=ACTR2 PE=3 SV=1                                                                                | tr E9PF41 E9PF41_HUMAN (+1)  | 45 kDa      | 49        | 8       | 56          | 12         |
| Actin, gamma-enteric smooth muscle OS=Homo sapiens GN=ACTG2 PE=3 SV=1                                                                     | tr E9PG30 E9PG30_HUMAN (+6)  | 37 kDa      | 7         | 3       | 23          | 12         |
| 14-3-3 protein zeta/delta (Fragment) OS=Homo sapiens GN=YWHAZ PE=3 SV=1                                                                   | tr E7EX29 E7EX29_HUMAN (+4)  | 28 kDa      | 50        | 3       | 27          | 53         |
| Spectrin alpha chain, non-erythrocytic 1 OS=Homo sapiens GN=SPTAN1 PE=4 SV=2                                                              | tr A6NG51 A6NG51_HUMAN       | 285 kDa     | 27        | 0       | 84          | 0          |
| Actin-related protein 3 OS=Homo sapiens GN=ACTR3 PE=2 SV=1                                                                                | tr B4DXW1 B4DXW1_HUMAN (+2)  | 42 kDa      | 50        | 11      | 45          | 6          |
| Glutathione S-transferase Mu 1 OS=Homo sapiens GN=GSTM1 PE=4 SV=1                                                                         | tr B9ZVX7 B9ZVX7_HUMAN (+2)  | 17 kDa      | 4         | 0       | 67          | 33         |
| Phosphorylase OS=Homo sapiens GN=PYGL PE=3 SV=1                                                                                           | tr E9PK47 E9PK47_HUMAN       | 94 kDa      | 36        | 0       | 42          | 2          |
| LIM and SH3 domain protein 1 (Fragment) OS=Homo sapiens GN=LASP1 PE=4 SV=1                                                                | tr C9J9W2 C9J9W2_HUMAN       | 19 kDa      | 34        | 5       | 54          | 6          |
| DNA damage-binding protein 1 OS=Homo sapiens GN=DDB1 PE=4 SV=1                                                                            | tr F5GY55 F5GY55_HUMAN (+3)  | 122 kDa     | 10        | 14      | 44          | 19         |
| Tubulin alpha-4A chain OS=Homo sapiens GN=TUBA4A PE=2 SV=1                                                                                | tr A8MUB1 A8MUB1_HUMAN (+9)  | 48 kDa      | 53        | 0       | 41          | 8          |
| Glutathione S-transferase Mu 2 OS=Homo sapiens GN=GSTM2 PE=3 SV=1                                                                         | tr E9PEM9 E9PEM9_HUMAN (+4)  | 23 kDa      | 21        | 30      | 6           | 9          |
| Serum albumin OS=Homo sapiens GN=ALB PE=4 SV=1                                                                                            | tr B7WNR0 B7WNR0_HUMAN (+3)  | 56 kDa      | 59        | 4       | 7           | 0          |
| Keratin, type II cytoskeletal 5 (Fragment) OS=Homo sapiens GN=KRT5 PE=4 SV=1                                                              | tr F8WOC6 F8WOC6_HUMAN (+5)  | 21 kDa      | 29        | 14      | 0           | 8          |
| Plastin-2 OS=Homo sapiens GN=LCP1 PE=2 SV=1                                                                                               | tr B4DUA0 B4DUA0_HUMAN       | 22 kDa      | 33        | 7       | 54          | 2          |
| Glyceraldehyde-3-phosphate dehydrogenase OS=Homo sapiens GN=GAPDH PE=3 SV=1                                                               | tr E7EUT4 E7EUT4_HUMAN (+1)  | 32 kDa      | 21        | 0       | 26          | 16         |
| Fructose-bisphosphate aldolase OS=Homo sapiens GN=ALDOA PE=3 SV=1                                                                         | tr H3BQN4 H3BQN4_HUMAN (+2)  | 39 kDa      | 41        | 10      | 21          | 12         |
| Myosin-10 OS=Homo sapiens GN=MYH10 PE=4 SV=1                                                                                              | tr F8VTL3 F8VTL3_HUMAN (+2)  | 233 kDa     | 11        | 16      | 28          | 13         |
| Vimentin OS=Homo sapiens GN=VIM PE=3 SV=1                                                                                                 | tr B0YJ4 B0YJ4_HUMAN (+1)    | 50 kDa      | 32        | 0       | 20          | 29         |
| Cofilin-1 OS=Homo sapiens GN=CFL1 PE=4 SV=1                                                                                               | tr E9PK25 E9PK25_HUMAN (+5)  | 23 kDa      | 58        | 5       | 23          | 6          |
| Tubulin alpha-1C chain OS=Homo sapiens GN=TUBA1C PE=3 SV=1                                                                                | tr F5H5D3 F5H5D3_HUMAN (+6)  | 58 kDa      | 20        | 6       | 8           | 43         |
| Probable ATP-dependent RNA helicase DDX17 OS=Homo sapiens GN=DDX17 PE=3 SV=1                                                              | tr H3BLZ8 H3BLZ8_HUMAN (+2)  | 80 kDa      | 13        | 24      | 18          | 21         |
| Heat shock 70 kDa protein 1A/1B OS=Homo sapiens GN=HSPA1B PE=3 SV=1                                                                       | tr F8VZJ4 F8VZJ4_HUMAN       | 68 kDa      | 24        | 26      | 22          | 6          |
| Immunoglobulin-like and fibronectin type III domain-containing protein 1 OS=Homo sapiens GN=IGFN1 PE=4 SV=1                               | tr F8WAI1 F8WAI1_HUMAN       | 384 kDa     | 0         | 2       | 3           | 0          |
| Talin-2 (Fragment) OS=Homo sapiens GN=TLN2 PE=4 SV=1                                                                                      | tr H0YMT1 H0YMT1_HUMAN (+1)  | 155 kDa     | 18        | 0       | 28          | 6          |
| Myosin-14 OS=Homo sapiens GN=MYH14 PE=4 SV=1                                                                                              | tr F2Z2U8 F2Z2U8_HUMAN (+1)  | 231 kDa     | 14        | 22      | 28          | 14         |
| Keratin-81-like protein KRT121P OS=Homo sapiens GN=KRT121P PE=5 SV=4                                                                      | sp A6NCN2 K121P_HUMAN (+1)   | 29 kDa      | 27        | 52      | 0           | 0          |
| Septin-7 OS=Homo sapiens GN=SEPT7 PE=3 SV=1                                                                                               | tr E7EPK1 E7EPK1_HUMAN (+17) | 51 kDa      | 51        | 0       | 38          | 2          |
| Eukaryotic initiation factor 4A-II OS=Homo sapiens GN=EIF4A2 PE=3 SV=1                                                                    | tr E7EQG2 E7EQG2_HUMAN (+2)  | 41 kDa      | 21        | 11      | 22          | 15         |
| Keratin, type II cytoskeletal 1b OS=Homo sapiens GN=KRT77 PE=3 SV=1                                                                       | tr F5GY66 F5GY66_HUMAN       | 38 kDa      | 18        | 8       | 5           | 6          |
| POTE ankyrin domain family member F OS=Homo sapiens GN=POTEF PE=1 SV=2                                                                    | sp A5A3E0 POTEF_HUMAN        | 121 kDa     | 11        | 0       | 9           | 0          |
| Keratin, type I cuticular Ha5 OS=Homo sapiens GN=KRT35 PE=3 SV=1                                                                          | tr C4AM86 C4AM86_HUMAN (+3)  | 48 kDa      | 12        | 55      | 0           | 0          |
| Ankyrin repeat and BTB/POZ domain-containing protein BTBD11 OS=Homo sapiens GN=BTBD11 PE=2 SV=3                                           | sp A6QL63 BTBDB_HUMAN (+5)   | 121 kDa     | 0         | 0       | 0           | 66         |
| Filamin-B OS=Homo sapiens GN=FLNB PE=4 SV=1                                                                                               | tr E7EN95 E7EN95_HUMAN (+15) | 256 kDa     | 12        | 0       | 43          | 0          |
| Keratin, type II cytoskeletal 5 (Fragment) OS=Homo sapiens GN=KRT5 PE=3 SV=1                                                              | tr H0YI76 H0YI76_HUMAN (+1)  | 23 kDa      | 31        | 23      | 0           | 11         |
| Annexin (Fragment) OS=Homo sapiens GN=ANXA2 PE=3 SV=1                                                                                     | tr H0YMD0 H0YMD0_HUMAN (+14) | 25 kDa      | 26        | 7       | 33          | 8          |
| Putative protein FAM90A7P OS=Homo sapiens GN=FAM90A7P PE=5 SV=1                                                                           | sp A6NKC0 F90A7_HUMAN (+11)  | 50 kDa      | 0         | 0       | 4           | 0          |
| Junction plakoglobin OS=Homo sapiens GN=JUP PE=3 SV=1                                                                                     | tr F5GW8 F5GW8_HUMAN (+4)    | 66 kDa      | 14        | 17      | 2           | 11         |
| Phosphoglycerate kinase OS=Homo sapiens GN=PGK1 PE=2 SV=1                                                                                 | tr B7Z7A9 B7Z7A9_HUMAN       | 41 kDa      | 25        | 8       | 18          | 6          |
| WD repeat-containing protein 1 (Fragment) OS=Homo sapiens GN=WDR1 PE=4 SV=1                                                               | tr D6RD66 D6RD66_HUMAN       | 27 kDa      | 47        | 8       | 3           | 0          |

|                                                                                                         |                                |          |    |    |    |    |
|---------------------------------------------------------------------------------------------------------|--------------------------------|----------|----|----|----|----|
| Ras GTPase-activating-like protein IQGAP2 (Fragment) OS=Homo sapiens GN=IQGAP2 PE=4 SV=1                | tr E7EWC2 E7EWC2_HUMAN (+1)    | 160 kDa  | 11 | 0  | 33 | 0  |
| Cytoplasmic FMR1-interacting protein 2 OS=Homo sapiens GN=CYFIP2 PE=4 SV=1                              | tr E7EVF4 E7EVF4_HUMAN (+5)    | 146 kDa  | 18 | 0  | 26 | 0  |
| Heat shock protein HSP 90-alpha (Fragment) OS=Homo sapiens GN=HSP90AA1 PE=4 SV=1                        | tr G3V2J8 G3V2J8_HUMAN         | 20 kDa   | 30 | 4  | 14 | 4  |
| Transketolase OS=Homo sapiens GN=TKT PE=2 SV=1                                                          | tr B4E022 B4E022_HUMAN (+3)    | 63 kDa   | 28 | 6  | 6  | 4  |
| Keratin, type II cuticular Hb5 OS=Homo sapiens GN=KRT85 PE=3 SV=1                                       | tr F5GYI5 F5GYI5_HUMAN         | 33 kDa   | 29 | 24 | 0  | 0  |
| Heterogeneous nuclear ribonucleoprotein A1 OS=Homo sapiens GN=HNRNPA1 PE=4 SV=1                         | tr F8VRQ1 F8VRQ1_HUMAN (+8)    | 33 kDa   | 11 | 0  | 20 | 5  |
| L-lactate dehydrogenase (Fragment) OS=Homo sapiens GN=LDHB PE=3 SV=1                                    | tr A8MW50 A8MW50_HUMAN (+2)    | 25 kDa   | 25 | 3  | 17 | 7  |
| ATP-citrate synthase OS=Homo sapiens GN=ACLY PE=2 SV=1                                                  | tr B4E3P0 B4E3P0_HUMAN         | 91 kDa   | 19 | 0  | 22 | 0  |
| UTP-glucose-1-phosphate uridylyltransferase OS=Homo sapiens GN=UGP2 PE=4 SV=1                           | tr E7EUC7 E7EUC7_HUMAN (+11)   | 58 kDa   | 37 | 0  | 9  | 0  |
| Nesprin-1 OS=Homo sapiens GN=SYNE1 PE=4 SV=1                                                            | REVtr E9PEL9 E9PEL9_HUMAN (+5) | 1005 kDa | 0  | 2  | 0  | 0  |
| Proliferation-associated protein 2G4 OS=Homo sapiens GN=PA2G4 PE=4 SV=1                                 | tr F8VY8 F8VY8_HUMAN           | 42 kDa   | 17 | 8  | 24 | 6  |
| 6-phosphogluconate dehydrogenase, decarboxylating OS=Homo sapiens GN=PGD PE=2 SV=1                      | tr B4DQJ8 B4DQJ8_HUMAN (+1)    | 52 kDa   | 21 | 5  | 5  | 7  |
| Hematopoietic lineage cell-specific protein OS=Homo sapiens GN=HCLS1 PE=4 SV=1                          | tr E7EVW7 E7EVW7_HUMAN         | 50 kDa   | 15 | 3  | 27 | 2  |
| Elongation factor 1-gamma OS=Homo sapiens GN=EEF1G PE=2 SV=1                                            | tr B4DTG2 B4DTG2_HUMAN (+1)    | 56 kDa   | 15 | 5  | 12 | 7  |
| Gelsolin OS=Homo sapiens GN=GSN PE=4 SV=1                                                               | tr F5H1A8 F5H1A8_HUMAN         | 81 kDa   | 20 | 7  | 7  | 6  |
| Nesprin-1 OS=Homo sapiens GN=SYNE1 PE=4 SV=1                                                            | tr E9PEL9 E9PEL9_HUMAN (+14)   | 1005 kDa | 3  | 0  | 0  | 0  |
| Actin-related protein 2/3 complex subunit 1B OS=Homo sapiens GN=ARPC1B PE=4 SV=1                        | tr F8WCG3 F8WCG3_HUMAN (+5)    | 25 kDa   | 15 | 0  | 13 | 0  |
| Alpha actinin 4 short isoform OS=Homo sapiens GN=ACTN4 PE=2 SV=1                                        | tr D6PXX4 D6PXX4_HUMAN (+1)    | 80 kDa   | 11 | 0  | 27 | 0  |
| Septin 6 OS=Homo sapiens GN=SEPT6 PE=3 SV=1                                                             | tr B1AMS2 B1AMS2_HUMAN (+5)    | 49 kDa   | 23 | 0  | 14 | 0  |
| Actin, cytoplasmic 1 OS=Homo sapiens GN=ACTB PE=3 SV=1                                                  | tr G5E9R0 G5E9R0_HUMAN (+10)   | 14 kDa   | 28 | 0  | 10 | 0  |
| Fermitin family homolog 3 (Fragment) OS=Homo sapiens GN=FERMT3 PE=4 SV=1                                | tr F5H1C6 F5H1C6_HUMAN (+1)    | 33 kDa   | 17 | 5  | 14 | 5  |
| T-complex protein 1 subunit gamma OS=Homo sapiens GN=CCT3 PE=2 SV=1                                     | tr B4DUR8 B4DUR8_HUMAN (+11)   | 56 kDa   | 20 | 0  | 9  | 4  |
| Tropomyosin alpha-3 chain OS=Homo sapiens GN=TPM3 PE=4 SV=1                                             | tr D6R904 D6R904_HUMAN         | 11 kDa   | 7  | 14 | 16 | 12 |
| T-complex protein 1 subunit theta OS=Homo sapiens GN=CCT8 PE=2 SV=1                                     | tr B4DEM7 B4DEM7_HUMAN (+2)    | 58 kDa   | 30 | 0  | 2  | 2  |
| Pro-interleukin-16 (Fragment) OS=Homo sapiens GN=IL16 PE=4 SV=2                                         | tr H0YLH9 H0YLH9_HUMAN (+1)    | 65 kDa   | 9  | 6  | 23 | 7  |
| Uncharacterized protein OS=Homo sapiens GN=VCL PE=2 SV=1                                                | tr B4DTM7 B4DTM7_HUMAN         | 36 kDa   | 19 | 5  | 11 | 2  |
| Actin-related protein 2/3 complex subunit 4 OS=Homo sapiens GN=ARPC4 PE=4 SV=1                          | tr C9JWM7 C9JWM7_HUMAN (+3)    | 22 kDa   | 13 | 3  | 20 | 5  |
| Coatomer protein complex, subunit beta 2 (Beta prime), isoform CRA_b OS=Homo sapiens GN=COPB2 PE=2 SV=1 | tr B4DZ18 B4DZ18_HUMAN         | 99 kDa   | 13 | 6  | 12 | 5  |
| Integrin-linked protein kinase OS=Homo sapiens GN=ILK PE=2 SV=1                                         | tr B7Z418 B7Z418_HUMAN (+1)    | 44 kDa   | 15 | 0  | 12 | 0  |
| C4b-B OS=Homo sapiens GN=C4B PE=4 SV=1                                                                  | tr F5GXS0 F5GXS0_HUMAN (+12)   | 188 kDa  | 2  | 0  | 0  | 0  |
| Caldesmon OS=Homo sapiens GN=CALD1 PE=4 SV=1                                                            | tr E7EX44 E7EX44_HUMAN (+3)    | 64 kDa   | 6  | 2  | 22 | 0  |
| LanC-like protein 1 (Fragment) OS=Homo sapiens GN=LANCL1 PE=4 SV=1                                      | tr E9PH50 E9PH50_HUMAN         | 22 kDa   | 3  | 4  | 6  | 5  |
| Radixin OS=Homo sapiens GN=RDX PE=2 SV=1                                                                | tr A7YJ8 A7YJ8_HUMAN (+4)      | 71 kDa   | 24 | 0  | 3  | 0  |
| ATP-dependent RNA helicase DDX3Y OS=Homo sapiens GN=DDX3Y PE=2 SV=1                                     | tr B4DXX7 B4DXX7_HUMAN (+1)    | 73 kDa   | 5  | 0  | 9  | 19 |
| Synembryn-A (Fragment) OS=Homo sapiens GN=RIC8A PE=4 SV=1                                               | tr H0YEN0 H0YEN0_HUMAN (+1)    | 32 kDa   | 0  | 0  | 14 | 13 |
| Capping protein (Actin filament) muscle Z-line, beta OS=Homo sapiens GN=CAPZB PE=4 SV=1                 | tr B1AK87 B1AK87_HUMAN (+3)    | 29 kDa   | 21 | 0  | 6  | 2  |
| T-complex protein 1 subunit beta OS=Homo sapiens GN=CCT2 PE=3 SV=2                                      | tr F5GW6F F5GW6F_HUMAN (+1)    | 57 kDa   | 25 | 0  | 0  | 0  |
| T-complex protein 1 subunit eta OS=Homo sapiens GN=CCT7 PE=3 SV=1                                       | tr B8ZZC9 B8ZZC9_HUMAN (+2)    | 55 kDa   | 33 | 0  | 0  | 0  |
| ATP-binding cassette sub-family A member 2 OS=Homo sapiens GN=ABCA2 PE=4 SV=1                           | tr E9PGB2 E9PGB2_HUMAN (+1)    | 108 kDa  | 0  | 0  | 0  | 3  |
| T-complex protein 1 subunit zeta OS=Homo sapiens GN=CCT6A PE=2 SV=1                                     | tr B4DPJ8 B4DPJ8_HUMAN (+1)    | 55 kDa   | 13 | 0  | 5  | 0  |
| Eukaryotic translation initiation factor 4 gamma 1 OS=Homo sapiens GN=EIF4G1 PE=4 SV=1                  | tr E9PFM1 E9PFM1_HUMAN (+9)    | 176 kDa  | 5  | 0  | 9  | 0  |
| T-complex protein 1 subunit delta OS=Homo sapiens GN=CCT4 PE=2 SV=1                                     | tr B7Z9L0 B7Z9L0_HUMAN         | 52 kDa   | 24 | 0  | 4  | 4  |
| Spectrin beta chain, non-erythrocytic 1 (Fragment) OS=Homo sapiens GN=SPTBN1 PE=4 SV=1                  | tr F8W6C1 F8W6C1_HUMAN         | 81 kDa   | 11 | 0  | 19 | 0  |
| Ezrin OS=Homo sapiens GN=EZR PE=4 SV=2                                                                  | tr E7EQR4 E7EQR4_HUMAN (+2)    | 66 kDa   | 5  | 3  | 17 | 6  |
| Dynamins-2 OS=Homo sapiens GN=DNM2 PE=3 SV=1                                                            | tr E9PEQ4 E9PEQ4_HUMAN (+1)    | 98 kDa   | 24 | 0  | 3  | 0  |
| Filamin-A (Fragment) OS=Homo sapiens GN=FLNA PE=4 SV=1                                                  | tr H0Y5F3 H0Y5F3_HUMAN         | 25 kDa   | 5  | 0  | 15 | 0  |
| Microtubule-actin cross-linking factor 1, isoforms 1/2/3/5 OS=Homo sapiens GN=MACF1 PE=4 SV=1           | tr H3BPE1 H3BPE1_HUMAN (+6)    | 857 kDa  | 0  | 0  | 3  | 0  |
| Disks large homolog 1 OS=Homo sapiens GN=DLG1 PE=4 SV=1                                                 | tr E7EWL7 E7EWL7_HUMAN (+2)    | 88 kDa   | 0  | 2  | 0  | 0  |
| Keratin, type II cytoskeletal 5 (Fragment) OS=Homo sapiens GN=KRT5 PE=4 SV=1                            | tr F8VV57 F8VV57_HUMAN (+1)    | 12 kDa   | 9  | 7  | 0  | 2  |
| Spectrin alpha chain, non-erythrocytic 1 OS=Homo sapiens GN=SPTAN1 PE=4 SV=2                            | REVtr A6NGS1 A6NGS1_HUMAN      | 285 kDa  | 0  | 0  | 3  | 0  |
| Septin-1 (Fragment) OS=Homo sapiens GN=SEPT1 PE=3 SV=1                                                  | tr H3BS29 H3BS29_HUMAN (+1)    | 35 kDa   | 14 | 0  | 15 | 0  |
| Keratin, type II cytoskeletal 4 OS=Homo sapiens GN=KRT4 PE=3 SV=1                                       | tr F5H8K9 F5H8K9_HUMAN         | 54 kDa   | 9  | 0  | 0  | 0  |
| E3 ubiquitin-protein ligase RNF213 OS=Homo sapiens GN=RNF213 PE=4 SV=1                                  | tr H3BLU6 H3BLU6_HUMAN (+6)    | 374 kDa  | 0  | 0  | 2  | 0  |
| HCG1983504, isoform CRA_f OS=Homo sapiens GN=TUBB3 PE=2 SV=1                                            | tr A8K854 A8K854_HUMAN         | 42 kDa   | 13 | 0  | 14 | 7  |
| RuvB-like 2 OS=Homo sapiens GN=RUVBL2 PE=2 SV=1                                                         | tr B3KQ59 B3KQ59_HUMAN         | 46 kDa   | 15 | 0  | 10 | 8  |
| Protein PRRC2A OS=Homo sapiens GN=PRRC2A PE=4 SV=1                                                      | tr C9J1F6 C9J1F6_HUMAN (+12)   | 227 kDa  | 0  | 0  | 0  | 5  |
| Enolase (Fragment) OS=Homo sapiens GN=ENO3 PE=3 SV=1                                                    | tr E5RGZ4 E5RGZ4_HUMAN (+8)    | 30 kDa   | 13 | 5  | 7  | 7  |
| Non-POU domain-containing octamer-binding protein OS=Homo sapiens GN=NONO PE=4 SV=1                     | tr F5GYZ3 F5GYZ3_HUMAN (+2)    | 44 kDa   | 0  | 11 | 0  | 8  |



Homer protein homolog 3 OS=Homo sapiens GN=HOMER3 PE=4 SV=1  
Heterogeneous nuclear ribonucleoprotein D0 OS=Homo sapiens GN=HNRNPD PE=2 SV=1  
E3 ubiquitin-protein ligase HUWE1 (Fragment) OS=Homo sapiens GN=HUWE1 PE=4 SV=1  
Rab GDP dissociation inhibitor beta OS=Homo sapiens GN=GDI2 PE=4 SV=1  
Tenascin XB OS=Homo sapiens GN=TNXB PE=4 SV=1  
Tubulin polyglutamylase TLL4 OS=Homo sapiens GN=TLL4 PE=4 SV=1  
Protein phosphatase 1 regulatory subunit 12A (Fragment) OS=Homo sapiens GN=PPP1R12A PE=4 SV=1  
26S proteasome non-ATPase regulatory subunit 2 OS=Homo sapiens GN=PSMD2 PE=4 SV=1  
Tubulin alpha-1A chain OS=Homo sapiens GN=TUBA1A PE=3 SV=1  
Synembryn-A (Fragment) OS=Homo sapiens GN=RIC8A PE=4 SV=1  
Actin-related protein 2/3 complex subunit 2 (Fragment) OS=Homo sapiens GN=ARPC2 PE=4 SV=1  
Rho-associated protein kinase 2 OS=Homo sapiens GN=ROCK2 PE=4 SV=1  
Echinoderm microtubule-associated protein-like 4 OS=Homo sapiens GN=EML4 PE=4 SV=2  
Diaphanous homolog 1 (Drosophila), isoform CRA\_a OS=Homo sapiens GN=DIAPH1 PE=4 SV=1  
26S protease regulatory subunit 6A OS=Homo sapiens GN=PSMC3 PE=3 SV=1  
Kaliocin-1 (Fragment) OS=Homo sapiens GN=LTF PE=4 SV=1  
Minor histocompatibility antigen HA-1 OS=Homo sapiens GN=HMHA1 PE=4 SV=1  
Regulator of G-protein-signaling 3 OS=Homo sapiens GN=RG53 PE=2 SV=1  
Interferon alpha/beta receptor 2 (Fragment) OS=Homo sapiens GN=IFNAR2 PE=4 SV=1  
TRIO and F-actin-binding protein OS=Homo sapiens GN=TRIOBP PE=4 SV=1  
Coronin OS=Homo sapiens GN=CORO7 PE=2 SV=1  
26S protease regulatory subunit 8 OS=Homo sapiens GN=PSMC5 PE=2 SV=1  
Elongation factor 1-alpha 1 (Fragment) OS=Homo sapiens GN=EEF1A1 PE=4 SV=1  
F-actin-capping protein subunit alpha-2 OS=Homo sapiens GN=CAPZA2 PE=2 SV=1  
Dynactin subunit 1 OS=Homo sapiens GN=DCTN1 PE=4 SV=2  
Adenosylhomocysteinase OS=Homo sapiens GN=AHCY PE=3 SV=1  
Extracellular signal-regulated kinase-2 splice variant OS=Homo sapiens GN=MAPK1 PE=2 SV=1  
Nebulin OS=Homo sapiens GN=NEB PE=4 SV=1  
Dedicator of cytokinesis protein 11 OS=Homo sapiens GN=DOCK11 PE=4 SV=2  
Dedicator of cytokinesis protein 2 OS=Homo sapiens GN=DOCK2 PE=4 SV=1  
Protein transport protein Sec31A OS=Homo sapiens GN=SEC31A PE=2 SV=1  
T-complex protein 1 subunit alpha OS=Homo sapiens GN=TCP1 PE=3 SV=1  
RAS p21 protein activator 2, isoform CRA\_b OS=Homo sapiens GN=RASA2 PE=4 SV=1  
Heterogeneous nuclear ribonucleoprotein H OS=Homo sapiens GN=HNRNPH1 PE=4 SV=1  
Nesprin-2 OS=Homo sapiens GN=SYNE2 PE=4 SV=1  
DNA-directed RNA polymerase OS=Homo sapiens GN=POLR2B PE=3 SV=2  
Inosine-5'-monophosphate dehydrogenase 2 (Fragment) OS=Homo sapiens GN=IMPDH2 PE=3 SV=1  
Eukaryotic translation initiation factor 4B OS=Homo sapiens GN=EIF4B PE=4 SV=1  
V-type proton ATPase catalytic subunit A OS=Homo sapiens GN=ATP6V1A PE=2 SV=1  
RuvB-like 1 OS=Homo sapiens GN=RUVBL1 PE=4 SV=1  
Keratin, type II cytoskeletal 5 (Fragment) OS=Homo sapiens GN=KRT5 PE=4 SV=1  
Heterogeneous nuclear ribonucleoprotein D0 (Fragment) OS=Homo sapiens GN=HNRNPD PE=4 SV=1  
Dynamin-1-like protein OS=Homo sapiens GN=DNM1L PE=3 SV=1  
Lamin-B1 OS=Homo sapiens GN=LMNB1 PE=3 SV=1  
40S ribosomal protein SA (Fragment) OS=Homo sapiens GN=RPSA PE=3 SV=1  
Glutathione S-transferase Mu 1 OS=Homo sapiens GN=GSTM1 PE=3 SV=1  
Serine/threonine-protein phosphatase OS=Homo sapiens GN=PPP1CA PE=3 SV=1  
Protein disulfide isomerase family A, member 3, isoform CRA\_b OS=Homo sapiens GN=PDIA3 PE=3 SV=1  
SH3 domain-containing kinase-binding protein 1 OS=Homo sapiens GN=SH3KBP1 PE=2 SV=1  
Actin-related protein 2/3 complex subunit 3 (Fragment) OS=Homo sapiens GN=ARPC3 PE=4 SV=1  
26S proteasome non-ATPase regulatory subunit 6 OS=Homo sapiens GN=PSMD6 PE=4 SV=1  
Heat shock protein HSP 90-beta (Fragment) OS=Homo sapiens GN=HSP90AB1 PE=4 SV=1  
Alpha-centractin OS=Homo sapiens GN=ACTR1A PE=3 SV=1  
Mucin-5B OS=Homo sapiens GN=MUC5B PE=4 SV=1  
DOCK10.2 OS=Homo sapiens GN=DOCK10.2 PE=2 SV=2  
CAP-Gly domain-containing linker protein 1 OS=Homo sapiens GN=CLIP1 PE=4 SV=1  
14-3-3 protein theta (Fragment) OS=Homo sapiens GN=YWHAQ PE=4 SV=1  
SH3 domain-binding protein 1 OS=Homo sapiens GN=SH3BP1 PE=4 SV=1

|                                 |         |    |   |    |    |
|---------------------------------|---------|----|---|----|----|
| tr E9PCW9 E9PCW9_HUMAN          | 36 kDa  | 0  | 0 | 12 | 15 |
| tr B4DTC3 B4DTC3_HUMAN (+3)     | 34 kDa  | 5  | 0 | 14 | 0  |
| tr H0Y5W0 H0Y5W0_HUMAN (+6)     | 374 kDa | 2  | 0 | 2  | 0  |
| tr E7EU23 E7EU23_HUMAN          | 51 kDa  | 11 | 0 | 8  | 3  |
| REVtr BOUYX3 BOUYX3_HUMAN (+12) | 456 kDa | 2  | 0 | 0  | 0  |
| REVtr E9PH58 E9PH58_HUMAN (+1)  | 109 kDa | 2  | 0 | 0  | 0  |
| tr F8VZN8 F8VZN8_HUMAN (+3)     | 77 kDa  | 0  | 6 | 2  | 15 |
| tr E7EW34 E7EW34_HUMAN (+1)     | 86 kDa  | 14 | 0 | 10 | 0  |
| tr G3V1U9 G3V1U9_HUMAN (+5)     | 46 kDa  | 17 | 0 | 12 | 0  |
| tr H0YE35 H0YE35_HUMAN (+2)     | 16 kDa  | 0  | 0 | 7  | 11 |
| tr C9JTV5 C9JTV5_HUMAN (+2)     | 10 kDa  | 13 | 0 | 12 | 3  |
| tr E9PF63 E9PF63_HUMAN          | 133 kDa | 11 | 0 | 14 | 0  |
| tr B5MCW9 B5MCW9_HUMAN (+1)     | 102 kDa | 3  | 0 | 7  | 0  |
| tr B9ZVX0 B9ZVX0_HUMAN (+6)     | 139 kDa | 8  | 0 | 4  | 0  |
| tr E9PM69 E9PM69_HUMAN (+6)     | 44 kDa  | 12 | 0 | 6  | 4  |
| tr E7EQB2 E7EQB2_HUMAN (+1)     | 77 kDa  | 16 | 0 | 3  | 4  |
| tr F5H1R4 F5H1R4_HUMAN (+8)     | 112 kDa | 7  | 0 | 13 | 0  |
| tr B3KUB2 B3KUB2_HUMAN (+1)     | 66 kDa  | 0  | 0 | 19 | 0  |
| REVtr C9JCU0 C9JCU0_HUMAN (+3)  | 26 kDa  | 0  | 0 | 3  | 0  |
| tr F8W6V6 F8W6V6_HUMAN (+4)     | 74 kDa  | 0  | 6 | 3  | 6  |
| tr B3KSY4 B3KSY4_HUMAN (+1)     | 77 kDa  | 6  | 0 | 12 | 0  |
| tr A8K3Z3 A8K3Z3_HUMAN          | 45 kDa  | 13 | 0 | 8  | 4  |
| tr A6PW80 A6PW80_HUMAN          | 12 kDa  | 0  | 2 | 5  | 4  |
| tr B4DG50 B4DG50_HUMAN (+2)     | 20 kDa  | 14 | 0 | 5  | 0  |
| tr A8MY36 A8MY36_HUMAN (+4)     | 141 kDa | 4  | 0 | 13 | 0  |
| tr F5H737 F5H737_HUMAN          | 45 kDa  | 15 | 0 | 5  | 0  |
| tr A8CZ64 A8CZ64_HUMAN (+5)     | 36 kDa  | 7  | 0 | 4  | 2  |
| REVtr F8WCL5 F8WCL5_HUMAN (+2)  | 987 kDa | 0  | 2 | 0  | 0  |
| tr A6NIW2 A6NIW2_HUMAN (+3)     | 238 kDa | 3  | 0 | 4  | 0  |
| tr E7ERW7 E7ERW7_HUMAN (+1)     | 153 kDa | 0  | 0 | 7  | 4  |
| tr B7ZL00 B7ZL00_HUMAN (+4)     | 128 kDa | 11 | 0 | 8  | 0  |
| tr E7EQR6 E7EQR6_HUMAN (+3)     | 44 kDa  | 20 | 0 | 0  | 3  |
| tr G3V0F9 G3V0F9_HUMAN          | 97 kDa  | 0  | 0 | 18 | 0  |
| tr E9PCY7 E9PCY7_HUMAN (+6)     | 47 kDa  | 6  | 0 | 15 | 3  |
| tr G3V5X4 G3V5X4_HUMAN (+1)     | 788 kDa | 0  | 0 | 2  | 0  |
| tr C9J2Y9 C9J2Y9_HUMAN (+1)     | 133 kDa | 2  | 0 | 3  | 0  |
| tr H0Y4R1 H0Y4R1_HUMAN          | 51 kDa  | 17 | 0 | 0  | 0  |
| tr E7EX17 E7EX17_HUMAN (+7)     | 70 kDa  | 4  | 0 | 5  | 3  |
| tr B7Z1R5 B7Z1R5_HUMAN          | 65 kDa  | 11 | 0 | 8  | 0  |
| tr E7ETR0 E7ETR0_HUMAN          | 35 kDa  | 9  | 0 | 10 | 7  |
| tr H0YIN9 H0YIN9_HUMAN (+1)     | 22 kDa  | 0  | 8 | 0  | 0  |
| tr D6RAF8 D6RAF8_HUMAN (+7)     | 23 kDa  | 6  | 0 | 3  | 0  |
| tr G8JLD5 G8JLD5_HUMAN (+2)     | 80 kDa  | 2  | 0 | 0  | 0  |
| tr E9PBF6 E9PBF6_HUMAN (+2)     | 45 kDa  | 0  | 0 | 8  | 7  |
| tr C9J9K3 C9J9K3_HUMAN (+5)     | 30 kDa  | 3  | 0 | 11 | 2  |
| tr E7EWW9 E7EWW9_HUMAN          | 28 kDa  | 11 | 0 | 0  | 0  |
| tr A6NNR3 A6NNR3_HUMAN (+5)     | 33 kDa  | 6  | 0 | 3  | 4  |
| tr G5EA52 G5EA52_HUMAN          | 55 kDa  | 13 | 2 | 0  | 0  |
| tr B7Z6E8 B7Z6E8_HUMAN          | 44 kDa  | 8  | 0 | 9  | 0  |
| tr C9JZD1 C9JZD1_HUMAN (+1)     | 12 kDa  | 12 | 0 | 6  | 2  |
| tr C9IZE4 C9IZE4_HUMAN (+3)     | 52 kDa  | 10 | 0 | 4  | 0  |
| tr H0Y6E4 H0Y6E4_HUMAN          | 17 kDa  | 10 | 0 | 7  | 0  |
| tr F5H3I4 F5H3I4_HUMAN (+1)     | 35 kDa  | 3  | 0 | 5  | 0  |
| tr E9PBJ0 E9PBJ0_HUMAN          | 597 kDa | 4  | 0 | 0  | 0  |
| tr B3FL70 B3FL70_HUMAN (+2)     | 249 kDa | 3  | 0 | 3  | 0  |
| tr F5H0N7 F5H0N7_HUMAN (+1)     | 116 kDa | 3  | 0 | 8  | 0  |
| tr E9PG15 E9PG15_HUMAN (+1)     | 17 kDa  | 4  | 0 | 7  | 8  |
| tr F5GZA8 F5GZA8_HUMAN          | 55 kDa  | 6  | 0 | 10 | 0  |

AP-1 complex subunit gamma-1 OS=Homo sapiens GN=AP1G1 PE=2 SV=1  
 MLL cleavage product C180 OS=Homo sapiens GN=MLL PE=4 SV=1  
 Eukaryotic translation initiation factor 4 gamma 3 OS=Homo sapiens GN=EIF4G3 PE=4 SV=1  
 General vesicular transport factor p115 OS=Homo sapiens GN=USO1 PE=4 SV=1  
 Elongation factor 1-delta OS=Homo sapiens GN=EEF1D PE=3 SV=1  
 Calcium/calmodulin-dependent protein kinase type II subunit delta OS=Homo sapiens GN=CAMK2D PE=4 SV=1  
 ALOX5 protein OS=Homo sapiens GN=ALOX5 PE=2 SV=1  
 HCF N-terminal chain 5 OS=Homo sapiens GN=HCFC1 PE=4 SV=2  
 Calponin-2 OS=Homo sapiens GN=CNN2 PE=2 SV=1  
 Annexin OS=Homo sapiens GN=ANXA4 PE=2 SV=1  
 AP-1 complex subunit beta-1 (Fragment) OS=Homo sapiens GN=AP1B1 PE=4 SV=1  
 HCG2002594, isoform CRA\_c OS=Homo sapiens GN=SEPT5 PE=3 SV=1  
 Mitotic checkpoint protein BUB3 OS=Homo sapiens GN=BUB3 PE=2 SV=1  
 Keratin-associated protein 2-1 OS=Homo sapiens GN=KRTAP2-1 PE=4 SV=1  
 Ena/VASP-like protein OS=Homo sapiens GN=EVL PE=2 SV=1  
 Alstrom syndrome protein 1 OS=Homo sapiens GN=ALMS1 PE=4 SV=1  
 C-1-tetrahydrofolate synthase, cytoplasmic OS=Homo sapiens GN=MTHFD1 PE=3 SV=1  
 Phosphoribosyl pyrophosphate synthetase 1 OS=Homo sapiens GN=PRPS1 PE=3 SV=1  
 AP-1 complex subunit mu-1 OS=Homo sapiens GN=AP1M1 PE=4 SV=1  
 Guanine nucleotide exchange factor DBS (Fragment) OS=Homo sapiens GN=MCF2L PE=4 SV=1  
 Nascent polypeptide-associated complex subunit alpha OS=Homo sapiens GN=NACA PE=4 SV=1  
 Probable ATP-dependent RNA helicase DHX36 OS=Homo sapiens GN=DHX36 PE=4 SV=1  
 Acidic leucine-rich nuclear phosphoprotein 32 family member E (Fragment) OS=Homo sapiens GN=ANP32E PE=4 SV=1  
 Transaldolase OS=Homo sapiens GN=TALDO1 PE=3 SV=1  
 Synaptic vesicle membrane protein VAT-1 homolog OS=Homo sapiens GN=VAT1 PE=2 SV=1  
 Ras GTPase-activating-like protein IQGAP1 (Fragment) OS=Homo sapiens GN=IQGAP1 PE=4 SV=1  
 Kinectin OS=Homo sapiens GN=KTN1 PE=4 SV=1  
 Nebulin OS=Homo sapiens GN=NEB PE=4 SV=1  
 Poly(RC)-binding protein 2 OS=Homo sapiens GN=PCBP2 PE=2 SV=1  
 Heterogeneous nuclear ribonucleoprotein A3 OS=Homo sapiens GN=HNRNPA3 PE=4 SV=1  
 Dynactin subunit 2 OS=Homo sapiens GN=DCTN2 PE=4 SV=1  
 Annexin OS=Homo sapiens GN=ANXA6 PE=3 SV=1  
 Heat shock protein beta-1 OS=Homo sapiens GN=HSPB1 PE=4 SV=1  
 Glucose-6-phosphate 1-dehydrogenase (Fragment) OS=Homo sapiens GN=G6PD PE=3 SV=1  
 Coiled-coil domain-containing protein 88B OS=Homo sapiens GN=CCDC88B PE=1 SV=1  
 Heterogeneous nuclear ribonucleoprotein A/B OS=Homo sapiens GN=HNRNPAB PE=4 SV=1  
 Tyrosine-protein kinase Fes/Fps OS=Homo sapiens GN=FES PE=3 SV=1  
 Ribonucleoprotein PTB-binding 1 OS=Homo sapiens GN=RAVER1 PE=4 SV=1  
 Uncharacterized protein OS=Homo sapiens PE=4 SV=1  
 26S protease regulatory subunit 10B (Fragment) OS=Homo sapiens GN=PSMC6 PE=4 SV=1  
 T-complex protein 1 subunit epsilon OS=Homo sapiens GN=CCT5 PE=4 SV=1  
 Serine/threonine-protein phosphatase 2A 65 kDa regulatory subunit A alpha isoform OS=Homo sapiens GN=PPP2R1A PE=4 SV=1  
 Septin-11 OS=Homo sapiens GN=SEPT11 PE=3 SV=1  
 Ras-related C3 botulinum toxin substrate 2 OS=Homo sapiens GN=RAC2 PE=3 SV=1  
 Twinfilin-2 OS=Homo sapiens GN=TWF2 PE=4 SV=1  
 Archain 1, isoform CRA\_a OS=Homo sapiens GN=ARCN1 PE=4 SV=1  
 ATP-binding cassette sub-family E member 1 OS=Homo sapiens GN=ABCE1 PE=4 SV=1  
 Golgin subfamily B member 1 OS=Homo sapiens GN=GOLGB1 PE=4 SV=1  
 Remodeling and spacing factor 1 (Fragment) OS=Homo sapiens GN=RSF1 PE=4 SV=1  
 Nuclear pore complex protein Nup153 OS=Homo sapiens GN=NUP153 PE=4 SV=1  
 AP-3 complex subunit beta-1 OS=Homo sapiens GN=AP3B1 PE=4 SV=1  
 V-type proton ATPase subunit B, brain isoform (Fragment) OS=Homo sapiens GN=ATP6V1B2 PE=4 SV=1  
 COP9 signalosome complex subunit 4 OS=Homo sapiens GN=COPS4 PE=4 SV=1  
 Ubiquitin carboxyl-terminal hydrolase OS=Homo sapiens GN=USP7 PE=2 SV=1  
 Leukotriene A-4 hydrolase OS=Homo sapiens GN=LTA4H PE=4 SV=1  
 Coatmer subunit beta (Fragment) OS=Homo sapiens GN=COPB1 PE=4 SV=1  
 Beta-parvin OS=Homo sapiens GN=PARVB PE=4 SV=1  
 LIM and senescent cell antigen-like-containing domain protein 2 OS=Homo sapiens GN=LIMS2 PE=4 SV=1

|                                |         |    |    |    |   |
|--------------------------------|---------|----|----|----|---|
| tr B3KXW5 B3KXW5_HUMAN (+4)    | 94 kDa  | 10 | 0  | 10 | 0 |
| REVtr E9PQG7 E9PQG7_HUMAN (+2) | 432 kDa | 0  | 5  | 0  | 0 |
| tr F5H564 F5H564_HUMAN (+1)    | 134 kDa | 2  | 0  | 5  | 0 |
| tr F5GYR8 F5GYR8_HUMAN (+3)    | 109 kDa | 12 | 0  | 3  | 0 |
| tr E9PRY8 E9PRY8_HUMAN (+22)   | 77 kDa  | 6  | 0  | 4  | 0 |
| tr E9PBG7 E9PBG7_HUMAN (+2)    | 58 kDa  | 7  | 0  | 13 | 0 |
| tr B7ZLS0 B7ZLS0_HUMAN         | 72 kDa  | 3  | 0  | 3  | 2 |
| tr A6NEM2 A6NEM2_HUMAN (+3)    | 213 kDa | 3  | 0  | 7  | 0 |
| tr B4DDF4 B4DDF4_HUMAN (+2)    | 33 kDa  | 7  | 0  | 9  | 2 |
| tr B4DDF9 B4DDF9_HUMAN         | 27 kDa  | 5  | 3  | 7  | 3 |
| tr C9J1E7 C9J1E7_HUMAN         | 65 kDa  | 5  | 0  | 7  | 0 |
| tr G3XAH0 G3XAH0_HUMAN (+4)    | 44 kDa  | 8  | 0  | 9  | 0 |
| tr B4DDM6 B4DDM6_HUMAN         | 28 kDa  | 8  | 0  | 8  | 0 |
| tr F5H1T9 F5H1T9_HUMAN (+1)    | 13 kDa  | 3  | 13 | 0  | 0 |
| tr B7Z3I5 B7Z3I5_HUMAN         | 42 kDa  | 6  | 0  | 9  | 0 |
| REVtr B8ZZJ3 B8ZZJ3_HUMAN (+1) | 456 kDa | 0  | 2  | 0  | 0 |
| tr F5H2F4 F5H2F4_HUMAN (+2)    | 111 kDa | 7  | 0  | 5  | 0 |
| tr B1ALA9 B1ALA9_HUMAN (+1)    | 24 kDa  | 4  | 0  | 5  | 0 |
| tr E7ENJ6 E7ENJ6_HUMAN         | 43 kDa  | 6  | 0  | 5  | 0 |
| tr H0Y4M6 H0Y4M6_HUMAN (+1)    | 36 kDa  | 0  | 3  | 0  | 0 |
| tr E9PAV3 E9PAV3_HUMAN (+5)    | 205 kDa | 6  | 0  | 0  | 0 |
| tr F5GZS0 F5GZS0_HUMAN (+1)    | 113 kDa | 0  | 0  | 5  | 0 |
| tr E9PPH5 E9PPH5_HUMAN (+4)    | 13 kDa  | 4  | 0  | 0  | 0 |
| tr F2Z393 F2Z393_HUMAN (+1)    | 35 kDa  | 6  | 0  | 2  | 0 |
| tr B4DPX4 B4DPX4_HUMAN (+1)    | 35 kDa  | 7  | 0  | 4  | 2 |
| tr H0YKA5 H0YKA5_HUMAN         | 5 kDa   | 2  | 0  | 14 | 0 |
| REVtr G3V4Y7 G3V4Y7_HUMAN (+4) | 69 kDa  | 0  | 0  | 2  | 0 |
| tr F8WCLS F8WCLS_HUMAN (+2)    | 987 kDa | 0  | 2  | 0  | 0 |
| tr B4DLC0 B4DLC0_HUMAN (+12)   | 32 kDa  | 6  | 0  | 8  | 0 |
| tr E7EWI9 E7EWI9_HUMAN         | 34 kDa  | 3  | 0  | 10 | 4 |
| tr F5H223 F5H223_HUMAN (+1)    | 42 kDa  | 10 | 0  | 8  | 0 |
| tr E9PGK1 E9PGK1_HUMAN (+11)   | 72 kDa  | 0  | 3  | 2  | 2 |
| tr F8WE04 F8WE04_HUMAN         | 20 kDa  | 2  | 0  | 0  | 0 |
| tr E7EM57 E7EM57_HUMAN (+2)    | 37 kDa  | 8  | 0  | 0  | 0 |
| sp A6NC98 CC88B_HUMAN (+5)     | 165 kDa | 7  | 0  | 2  | 0 |
| tr D6RD18 D6RD18_HUMAN (+2)    | 30 kDa  | 5  | 0  | 8  | 3 |
| tr E7ENM8 E7ENM8_HUMAN         | 77 kDa  | 6  | 0  | 3  | 0 |
| tr E9PAU2 E9PAU2_HUMAN         | 80 kDa  | 0  | 0  | 6  | 2 |
| tr F8W810 F8W810_HUMAN         | 51 kDa  | 3  | 0  | 3  | 0 |
| tr H0YJCO H0YJCO_HUMAN         | 30 kDa  | 3  | 0  | 2  | 3 |
| tr E7ENZ3 E7ENZ3_HUMAN (+3)    | 54 kDa  | 7  | 0  | 0  | 0 |
| tr F5H3X9 F5H3X9_HUMAN (+1)    | 59 kDa  | 14 | 0  | 0  | 0 |
| tr D6RER5 D6RER5_HUMAN (+11)   | 50 kDa  | 9  | 0  | 5  | 0 |
| tr B1AH77 B1AH77_HUMAN (+2)    | 17 kDa  | 9  | 0  | 0  | 5 |
| tr D6RG15 D6RG15_HUMAN         | 29 kDa  | 9  | 0  | 7  | 0 |
| tr B0YI66 B0YI66_HUMAN (+2)    | 62 kDa  | 10 | 3  | 0  | 0 |
| tr D6R9I9 D6R9I9_HUMAN (+2)    | 47 kDa  | 15 | 0  | 0  | 0 |
| REVtr E7EP74 E7EP74_HUMAN (+4) | 377 kDa | 0  | 2  | 0  | 0 |
| REVtr H0YCN2 H0YCN2_HUMAN (+1) | 91 kDa  | 0  | 2  | 0  | 0 |
| tr F6QR24 F6QR24_HUMAN         | 157 kDa | 0  | 0  | 3  | 0 |
| tr E5RJ68 E5RJ68_HUMAN         | 116 kDa | 10 | 0  | 0  | 0 |
| tr H0YCO4 H0YCO4_HUMAN         | 21 kDa  | 10 | 0  | 0  | 0 |
| tr D6RAX7 D6RAX7_HUMAN (+4)    | 48 kDa  | 7  | 0  | 4  | 0 |
| tr B7Z815 B7Z815_HUMAN (+5)    | 126 kDa | 5  | 0  | 6  | 0 |
| tr F8VV40 F8VV40_HUMAN         | 67 kDa  | 5  | 6  | 0  | 0 |
| tr E9PP73 E9PP73_HUMAN         | 56 kDa  | 7  | 0  | 3  | 0 |
| tr B0QYM8 B0QYM8_HUMAN         | 38 kDa  | 9  | 0  | 10 | 0 |
| tr F5H6E6 F5H6E6_HUMAN (+1)    | 41 kDa  | 0  | 0  | 6  | 0 |

|                                                                                                                         |                                 |         |    |   |   |   |
|-------------------------------------------------------------------------------------------------------------------------|---------------------------------|---------|----|---|---|---|
| Macrophage-capping protein OS=Homo sapiens GN=CAPG PE=2 SV=1                                                            | tr B4DU58 B4DU58_HUMAN (+2)     | 36 kDa  | 6  | 0 | 2 | 0 |
| Protein SEC13 homolog OS=Homo sapiens GN=SEC13 PE=4 SV=1                                                                | tr A8MV37 A8MV37_HUMAN (+3)     | 34 kDa  | 0  | 0 | 6 | 0 |
| Lipopolysaccharide-responsive and beige-like anchor protein OS=Homo sapiens GN=LRBA PE=4 SV=1                           | tr E9PEM5 E9PEM5_HUMAN (+4)     | 287 kDa | 4  | 0 | 0 | 0 |
| Septin-2 OS=Homo sapiens GN=SEPT2 PE=3 SV=1                                                                             | tr B5MCX3 B5MCX3_HUMAN (+1)     | 37 kDa  | 8  | 0 | 6 | 0 |
| Actin-related protein 2/3 complex subunit 5 OS=Homo sapiens GN=ARPC5 PE=3 SV=1                                          | tr B1ALCO B1ALCO_HUMAN          | 15 kDa  | 6  | 0 | 0 | 0 |
| Zyxin (Fragment) OS=Homo sapiens GN=ZYX PE=4 SV=1                                                                       | tr H0Y2Y8 H0Y2Y8_HUMAN (+1)     | 58 kDa  | 4  | 0 | 4 | 0 |
| Serine/threonine-protein kinase WNK1 OS=Homo sapiens GN=WNK1 PE=4 SV=1                                                  | tr F5H2M7 F5H2M7_HUMAN (+3)     | 305 kDa | 4  | 0 | 0 | 0 |
| Albumin, isoform CRA_k OS=Homo sapiens GN=ALB PE=4 SV=1                                                                 | tr C9JKR2 C9JKR2_HUMAN (+3)     | 47 kDa  | 6  | 0 | 2 | 0 |
| Arf-GAP with Rho-GAP domain, ANK repeat and PH domain-containing protein 1 OS=Homo sapiens GN=ARAP1 PE=4 SV=1           | tr E7EU13 E7EU13_HUMAN (+3)     | 135 kDa | 2  | 0 | 0 | 0 |
| Eukaryotic translation initiation factor 2 subunit 1 (Fragment) OS=Homo sapiens GN=EIF2F1 PE=4 SV=1                     | tr G3V4T5 G3V4T5_HUMAN (+1)     | 31 kDa  | 2  | 0 | 6 | 0 |
| Stress-induced-phosphoprotein 1 OS=Homo sapiens GN=STIP1 PE=4 SV=1                                                      | tr G3XAD8 G3XAD8_HUMAN (+9)     | 68 kDa  | 8  | 0 | 0 | 0 |
| Threonine--tRNA ligase, cytoplasmic OS=Homo sapiens GN=TARS PE=3 SV=1                                                   | tr E7ER13 E7ER13_HUMAN (+1)     | 70 kDa  | 7  | 0 | 2 | 0 |
| Protein arginine N-methyltransferase 1 OS=Homo sapiens GN=PRMT1 PE=4 SV=1                                               | tr E9PKG1 E9PKG1_HUMAN (+1)     | 38 kDa  | 7  | 0 | 5 | 0 |
| Drebrin-like protein OS=Homo sapiens GN=DBNL PE=2 SV=1                                                                  | tr B4DDD6 B4DDD6_HUMAN (+12)    | 46 kDa  | 5  | 0 | 0 | 0 |
| Rho guanine nucleotide exchange factor 6 OS=Homo sapiens GN=ARHGEF6 PE=2 SV=1                                           | tr B7Z3C7 B7Z3C7_HUMAN (+3)     | 73 kDa  | 5  | 0 | 4 | 0 |
| Zinc finger protein 521 OS=Homo sapiens GN=ZNF521 PE=4 SV=2                                                             | tr H7BYU6 H7BYU6_HUMAN (+2)     | 140 kDa | 0  | 0 | 2 | 0 |
| Striatin-4 OS=Homo sapiens GN=STRN4 PE=4 SV=1                                                                           | tr F8VYA6 F8VYA6_HUMAN (+8)     | 81 kDa  | 0  | 0 | 7 | 0 |
| Protein SET OS=Homo sapiens GN=SET PE=3 SV=1                                                                            | tr B2REB8 B2REB8_HUMAN          | 31 kDa  | 9  | 0 | 0 | 3 |
| Microtubule-associated protein OS=Homo sapiens GN=MAP4 PE=4 SV=1                                                        | tr E7EVA0 E7EVA0_HUMAN (+6)     | 245 kDa | 2  | 0 | 0 | 0 |
| Structural maintenance of chromosomes protein 1A OS=Homo sapiens GN=SMC1A PE=4 SV=1                                     | tr G8JL1 G8JL1_HUMAN (+3)       | 59 kDa  | 0  | 0 | 4 | 3 |
| Keratin, type I cytoskeletal 40 OS=Homo sapiens GN=KRT40 PE=4 SV=1                                                      | tr G3V1C2 G3V1C2_HUMAN          | 26 kDa  | 0  | 8 | 0 | 0 |
| 60S acidic ribosomal protein P0 (Fragment) OS=Homo sapiens GN=RPLP0 PE=3 SV=1                                           | tr F8VU65 F8VU65_HUMAN (+9)     | 27 kDa  | 3  | 0 | 4 | 2 |
| 26S protease regulatory subunit 7 OS=Homo sapiens GN=PSMC2 PE=2 SV=1                                                    | tr B7Z5E2 B7Z5E2_HUMAN          | 33 kDa  | 7  | 0 | 3 | 0 |
| Vacuolar protein sorting-associated protein 26A OS=Homo sapiens GN=VPS26A PE=4 SV=1                                     | tr F5H4L7 F5H4L7_HUMAN          | 37 kDa  | 4  | 0 | 5 | 0 |
| Tubulin beta chain OS=Homo sapiens GN=TUBB PE=3 SV=1                                                                    | tr F8VUJ7 F8VUJ7_HUMAN (+3)     | 47 kDa  | 0  | 0 | 4 | 3 |
| Protein-tyrosine kinase 2-beta OS=Homo sapiens GN=PTK2B PE=4 SV=1                                                       | tr E9PB14 E9PB14_HUMAN (+4)     | 68 kDa  | 2  | 0 | 0 | 0 |
| EF-hand domain-containing protein 1 OS=Homo sapiens GN=EFHC1 PE=4 SV=1                                                  | REVtr F5GZD8 F5GZD8_HUMAN       | 72 kDa  | 0  | 0 | 0 | 2 |
| SKI family transcriptional corepressor 1 OS=Homo sapiens GN=SKOR1 PE=4 SV=1                                             | REVtr G3V3E1 G3V3E1_HUMAN (+2)  | 96 kDa  | 0  | 2 | 0 | 0 |
| Dnal1 homolog subfamily A member 2 (Fragment) OS=Homo sapiens GN=DNAA2 PE=4 SV=1                                        | tr H3B1M5 H3B1M5_HUMAN          | 15 kDa  | 2  | 0 | 4 | 5 |
| Eukaryotic translation initiation factor 3 subunit F OS=Homo sapiens GN=EIF3F PE=2 SV=1                                 | tr B3KSH1 B3KSH1_HUMAN (+3)     | 39 kDa  | 2  | 3 | 0 | 2 |
| Heat shock 70 kDa protein 1-like OS=Homo sapiens GN=HSPA1L PE=2 SV=1                                                    | tr B4DXY3 B4DXY3_HUMAN (+7)     | 58 kDa  | 0  | 2 | 0 | 0 |
| Peptidyl-prolyl cis-trans isomerase FKBP5 OS=Homo sapiens GN=FKBP5 PE=2 SV=1                                            | tr B7Z7Z8 B7Z7Z8_HUMAN          | 32 kDa  | 5  | 0 | 0 | 0 |
| Histone H2B OS=Homo sapiens GN=HIST2H2BF PE=2 SV=1                                                                      | tr B4DR52 B4DR52_HUMAN          | 18 kDa  | 0  | 8 | 0 | 0 |
| ADP-ribosylation factor 3 OS=Homo sapiens GN=ARF3 PE=2 SV=1                                                             | tr B7ZB63 B7ZB63_HUMAN (+2)     | 16 kDa  | 5  | 2 | 5 | 2 |
| Bridging integrator 2 OS=Homo sapiens GN=BIN2 PE=4 SV=1                                                                 | tr F5HOW4 F5HOW4_HUMAN (+1)     | 59 kDa  | 5  | 0 | 3 | 0 |
| 26S protease regulatory subunit 7 (Fragment) OS=Homo sapiens GN=PSMC2 PE=4 SV=1                                         | tr C9JLS9 C9JLS9_HUMAN          | 15 kDa  | 7  | 0 | 3 | 0 |
| Protein disulfide-isomerase A6 OS=Homo sapiens GN=PDI6 PE=3 SV=1                                                        | tr B5MCQ5 B5MCQ5_HUMAN (+2)     | 53 kDa  | 6  | 0 | 3 | 0 |
| T-complex protein 1 subunit delta OS=Homo sapiens GN=CCT4 PE=3 SV=1                                                     | tr F5H5W3 F5H5W3_HUMAN          | 55 kDa  | 5  | 0 | 0 | 0 |
| Ras-related protein Rap-1b (Fragment) OS=Homo sapiens GN=RAP1B PE=4 SV=1                                                | tr E7ESV4 E7ESV4_HUMAN (+4)     | 18 kDa  | 7  | 0 | 3 | 4 |
| Phosphatidylinositol 5-phosphate 4-kinase type-2 alpha OS=Homo sapiens GN=PIP4K2A PE=2 SV=1                             | tr B4DGX2 B4DGX2_HUMAN          | 40 kDa  | 7  | 0 | 2 | 0 |
| Lysozyme C OS=Homo sapiens GN=LYZ PE=3 SV=1                                                                             | tr F8VV32 F8VV32_HUMAN          | 11 kDa  | 8  | 0 | 0 | 0 |
| Cell division control protein 42 homolog OS=Homo sapiens GN=CDC42 PE=3 SV=1                                             | tr E7ETU3 E7ETU3_HUMAN          | 27 kDa  | 4  | 0 | 4 | 0 |
| Protein disulfide-isomerase OS=Homo sapiens GN=P4HB PE=3 SV=1                                                           | tr F5H8J2 F5H8J2_HUMAN (+1)     | 51 kDa  | 11 | 0 | 0 | 0 |
| Phosphodiesterase 5A, cGMP-specific, isoform CRA_a OS=Homo sapiens GN=PDE5A PE=4 SV=1                                   | tr G5E9C5 G5E9C5_HUMAN          | 94 kDa  | 9  | 0 | 0 | 0 |
| Guanine nucleotide-binding protein G(i)/G(s)/G(t) subunit beta-2 OS=Homo sapiens GN=GNB2 PE=4 SV=1                      | tr E7EP32 E7EP32_HUMAN          | 32 kDa  | 0  | 0 | 2 | 8 |
| Protein PRRC2A OS=Homo sapiens GN=PRRC2A PE=4 SV=1                                                                      | REVtr F8VVM9 F8VVM9_HUMAN (+10) | 146 kDa | 2  | 0 | 0 | 0 |
| Dihydropyrimidinase-related protein 1 OS=Homo sapiens GN=CRMP1 PE=4 SV=1                                                | tr E9PD68 E9PD68_HUMAN          | 62 kDa  | 5  | 0 | 0 | 0 |
| Heat shock protein 75 kDa, mitochondrial OS=Homo sapiens GN=TRAP1 PE=3 SV=1                                             | tr F5H897 F5H897_HUMAN (+3)     | 74 kDa  | 3  | 0 | 0 | 3 |
| CAD protein OS=Homo sapiens GN=CAD PE=3 SV=1                                                                            | tr F8VPD4 F8VPD4_HUMAN          | 236 kDa | 3  | 0 | 0 | 0 |
| DENN domain-containing protein 4C OS=Homo sapiens GN=DENND4C PE=2 SV=1                                                  | tr B7Z660 B7Z660_HUMAN          | 110 kDa | 0  | 0 | 4 | 0 |
| Annexin OS=Homo sapiens GN=ANXA11 PE=2 SV=1                                                                             | tr B4DVE7 B4DVE7_HUMAN (+1)     | 51 kDa  | 5  | 0 | 0 | 0 |
| GRIP1-associated protein 1 OS=Homo sapiens GN=GRIPAP1 PE=4 SV=1                                                         | tr B1B0M1 B1B0M1_HUMAN          | 91 kDa  | 2  | 0 | 3 | 0 |
| Proteasome subunit alpha type-1 OS=Homo sapiens GN=PSMA1 PE=4 SV=1                                                      | tr F5GX11 F5GX11_HUMAN          | 27 kDa  | 3  | 0 | 4 | 0 |
| Isoform 2 of Structural maintenance of chromosomes flexible hinge domain-containing protein 1 OS=Homo sapiens GN=SMCHD1 | sp A6NHR9-2 SMHD1_HUMAN (+1)    | 216 kDa | 2  | 0 | 4 | 0 |
| Kinesin-like protein KIF2A OS=Homo sapiens GN=KIF2A PE=3 SV=1                                                           | tr E9PB70 E9PB70_HUMAN          | 78 kDa  | 2  | 0 | 5 | 2 |
| Vacuolar protein sorting-associated protein 26B OS=Homo sapiens GN=VPS26B PE=4 SV=1                                     | tr E9PRT4 E9PRT4_HUMAN          | 38 kDa  | 5  | 0 | 4 | 0 |
| Cytohesin-1 OS=Homo sapiens GN=CYTH1 PE=2 SV=1                                                                          | tr B7Z1T4 B7Z1T4_HUMAN (+1)     | 39 kDa  | 0  | 0 | 7 | 2 |
| cAMP-dependent protein kinase catalytic subunit beta OS=Homo sapiens GN=PRKACB PE=4 SV=2                                | tr C9JK39 C9JK39_HUMAN (+1)     | 41 kDa  | 3  | 0 | 2 | 0 |

|                                                                                                                       |                                |         |    |   |   |   |
|-----------------------------------------------------------------------------------------------------------------------|--------------------------------|---------|----|---|---|---|
| 5'-AMP-activated protein kinase subunit gamma-1 OS=Homo sapiens GN=PRKAG1 PE=2 SV=1                                   | tr B4DDT7 B4DDT7_HUMAN (+5)    | 34 kDa  | 7  | 0 | 4 | 0 |
| Cytosolic purine 5'-nucleotidase OS=Homo sapiens GN=NT5C2 PE=2 SV=1                                                   | tr B72382 B72382_HUMAN         | 61 kDa  | 10 | 0 | 0 | 0 |
| Serine/threonine-protein kinase MST4 OS=Homo sapiens GN=MST4 PE=2 SV=1                                                | tr B4E0Y9 B4E0Y9_HUMAN         | 49 kDa  | 6  | 0 | 2 | 0 |
| 26S proteasome non-ATPase regulatory subunit 3 OS=Homo sapiens GN=PSMD3 PE=2 SV=1                                     | tr B4DT72 B4DT72_HUMAN         | 41 kDa  | 9  | 0 | 0 | 0 |
| Polyadenylate-binding protein 1 OS=Homo sapiens GN=PABPC1 PE=4 SV=1                                                   | tr E7ERJ7 E7ERJ7_HUMAN (+3)    | 67 kDa  | 3  | 0 | 4 | 0 |
| Polyubiquitin-C (Fragment) OS=Homo sapiens GN=UBC PE=1 SV=1                                                           | tr F5H747 F5H747_HUMAN (+12)   | 18 kDa  | 2  | 0 | 2 | 0 |
| Nuclear export mediator factor NEMF (Fragment) OS=Homo sapiens GN=NEMF PE=4 SV=1                                      | tr G3V5V3 G3V5V3_HUMAN (+4)    | 114 kDa | 0  | 0 | 2 | 0 |
| Arf-GAP with GTPase, ANK repeat and PH domain-containing protein 2 OS=Homo sapiens GN=AGAP2 PE=4 SV=1                 | tr F8VV79 F8VV79_HUMAN         | 125 kDa | 2  | 0 | 0 | 0 |
| Kinesin heavy chain isoform 5C OS=Homo sapiens GN=KIF5C PE=3 SV=2                                                     | tr E9PET8 E9PET8_HUMAN         | 99 kDa  | 6  | 0 | 3 | 0 |
| Methionine--tRNA ligase, cytoplasmic OS=Homo sapiens GN=MARS PE=3 SV=3                                                | tr A6NC17 A6NC17_HUMAN (+14)   | 72 kDa  | 5  | 0 | 2 | 0 |
| Eukaryotic translation initiation factor 3 subunit H OS=Homo sapiens GN=EIF3S3 PE=2 SV=1                              | tr B3KS98 B3KS98_HUMAN (+5)    | 42 kDa  | 2  | 0 | 3 | 0 |
| Hexokinase-1 OS=Homo sapiens GN=HK1 PE=4 SV=1                                                                         | tr E7ENR4 E7ENR4_HUMAN (+3)    | 106 kDa | 0  | 0 | 2 | 0 |
| AMP deaminase 2 OS=Homo sapiens GN=AMPD2 PE=4 SV=1                                                                    | tr E9PNGO E9PNGO_HUMAN (+4)    | 88 kDa  | 5  | 0 | 0 | 0 |
| 1,4-alpha-glucan-branching enzyme OS=Homo sapiens GN=GBE1 PE=4 SV=1                                                   | tr E9PGM4 E9PGM4_HUMAN (+1)    | 76 kDa  | 2  | 0 | 0 | 0 |
| Ribosomal protein S6 kinase OS=Homo sapiens GN=RP56KA1 PE=3 SV=1                                                      | tr E9PGT3 E9PGT3_HUMAN (+1)    | 81 kDa  | 2  | 0 | 4 | 0 |
| 40S ribosomal protein S3 OS=Homo sapiens GN=RPS3 PE=3 SV=1                                                            | tr E9PLO9 E9PLO9_HUMAN (+11)   | 25 kDa  | 7  | 0 | 0 | 0 |
| Importin subunit beta-1 OS=Homo sapiens GN=KPNB1 PE=2 SV=1                                                            | tr B7ZAV6 B7ZAV6_HUMAN (+1)    | 81 kDa  | 6  | 0 | 0 | 0 |
| T-complex protein 1 subunit alpha OS=Homo sapiens GN=TCP1 PE=3 SV=1                                                   | tr E7ERF2 E7ERF2_HUMAN (+1)    | 47 kDa  | 7  | 0 | 0 | 0 |
| HEAT repeat-containing protein 5A OS=Homo sapiens GN=HEATR5A PE=4 SV=3                                                | tr B5MC49 B5MC49_HUMAN (+3)    | 123 kDa | 3  | 2 | 0 | 0 |
| Tropomodulin-3 (Fragment) OS=Homo sapiens GN=TMOD3 PE=4 SV=1                                                          | tr H0YKU1 H0YKU1_HUMAN (+1)    | 21 kDa  | 7  | 0 | 4 | 0 |
| Transitional endoplasmic reticulum ATPase (Fragment) OS=Homo sapiens GN=VCP PE=4 SV=1                                 | tr C9IZA5 C9IZA5_HUMAN (+2)    | 18 kDa  | 6  | 0 | 5 | 0 |
| Tyrosine-protein phosphatase non-receptor type 6 (Fragment) OS=Homo sapiens GN=PTPN6 PE=4 SV=1                        | tr F5H0N8 F5H0N8_HUMAN (+3)    | 18 kDa  | 6  | 4 | 0 | 0 |
| Liprin-alpha-3 OS=Homo sapiens GN=PPFIA3 PE=2 SV=1                                                                    | tr B4DEU8 B4DEU8_HUMAN         | 66 kDa  | 0  | 2 | 0 | 0 |
| Ankyrin repeat domain-containing protein 26 OS=Homo sapiens GN=ANKRD26 PE=4 SV=1                                      | tr E7ESJ3 E7ESJ3_HUMAN (+1)    | 198 kDa | 2  | 0 | 0 | 0 |
| Uncharacterized protein (Fragment) OS=Homo sapiens PE=4 SV=1                                                          | tr B5MCY1 B5MCY1_HUMAN         | 222 kDa | 2  | 0 | 0 | 0 |
| Serine/threonine-protein kinase MARK2 OS=Homo sapiens GN=MARK2 PE=4 SV=1                                              | tr E7ETY4 E7ETY4_HUMAN (+3)    | 78 kDa  | 0  | 0 | 0 | 3 |
| Probable ubiquitin carboxyl-terminal hydrolase FAF-X OS=Homo sapiens GN=USP9X PE=4 SV=1                               | tr E9PFG1 E9PFG1_HUMAN         | 116 kDa | 3  | 0 | 0 | 0 |
| Selenoprotein P (Fragment) OS=Homo sapiens GN=SEPP1 PE=4 SV=1                                                         | REVtr D6REX5 D6REX5_HUMAN (+1) | 35 kDa  | 0  | 0 | 0 | 3 |
| Glutamine--tRNA ligase OS=Homo sapiens GN=QARS PE=2 SV=1                                                              | tr B4DWJ2 B4DWJ2_HUMAN         | 87 kDa  | 2  | 0 | 3 | 0 |
| Serine/threonine-protein phosphatase 2A catalytic subunit beta isoform (Fragment) OS=Homo sapiens GN=PPP2CB PE=4 SV=1 | tr H0YBN9 H0YBN9_HUMAN         | 6 kDa   | 0  | 0 | 7 | 0 |
| Proteasome subunit alpha type (Fragment) OS=Homo sapiens GN=PSMA4 PE=3 SV=1                                           | tr H0YL69 H0YL69_HUMAN (+10)   | 26 kDa  | 0  | 0 | 3 | 0 |
| 6-phosphofructokinase type C (Fragment) OS=Homo sapiens GN=PFKP PE=4 SV=1                                             | tr B1APP6 B1APP6_HUMAN         | 26 kDa  | 4  | 0 | 5 | 0 |
| Signal transducer and activator of transcription 3 OS=Homo sapiens GN=STAT3 PE=4 SV=1                                 | tr G8JLH9 G8JLH9_HUMAN         | 76 kDa  | 5  | 0 | 2 | 0 |
| Keratin, type II cytoskeletal 7 (Fragment) OS=Homo sapiens GN=KRT7 PE=4 SV=1                                          | tr F8VZY5 F8VZY5_HUMAN (+1)    | 38 kDa  | 0  | 6 | 0 | 0 |
| 26S proteasome non-ATPase regulatory subunit 13 (Fragment) OS=Homo sapiens GN=PSMD13 PE=4 SV=1                        | tr E9PL38 E9PL38_HUMAN (+1)    | 30 kDa  | 5  | 0 | 4 | 0 |
| Heterogeneous nuclear ribonucleoprotein Q (Fragment) OS=Homo sapiens GN=SYNCRIP PE=4 SV=1                             | tr F6UXX1 F6UXX1_HUMAN         | 20 kDa  | 4  | 0 | 6 | 0 |
| Ras suppressor protein 1 OS=Homo sapiens GN=RSU1 PE=4 SV=1                                                            | tr F2Z2H2 F2Z2H2_HUMAN         | 20 kDa  | 0  | 0 | 7 | 0 |
| Casein kinase II subunit alpha OS=Homo sapiens GN=CSNK2A1 PE=4 SV=1                                                   | tr E7EU96 E7EU96_HUMAN         | 45 kDa  | 6  | 0 | 3 | 0 |
| SEC23-interacting protein OS=Homo sapiens GN=SEC23IP PE=4 SV=1                                                        | tr F5H0L8 F5H0L8_HUMAN         | 90 kDa  | 0  | 0 | 4 | 0 |
| DBIRD complex subunit KIAA1967 (Fragment) OS=Homo sapiens GN=KIAA1967 PE=4 SV=1                                       | tr H0YB24 H0YB24_HUMAN (+1)    | 69 kDa  | 2  | 0 | 6 | 0 |
| Nck-associated protein 1-like OS=Homo sapiens GN=NCKAP1L PE=4 SV=1                                                    | tr F8W050 F8W050_HUMAN         | 52 kDa  | 3  | 0 | 5 | 0 |
| Leucine-rich repeat flightless-interacting protein 1 OS=Homo sapiens GN=LRRFIP1 PE=4 SV=1                             | tr E9PGZ2 E9PGZ2_HUMAN         | 73 kDa  | 6  | 0 | 5 | 0 |
| EH domain-containing protein 1 (Fragment) OS=Homo sapiens GN=EHD1 PE=4 SV=1                                           | tr C9JC03 C9JC03_HUMAN         | 43 kDa  | 6  | 0 | 0 | 0 |
| Zinc finger protein 608 (Fragment) OS=Homo sapiens GN=ZNF608 PE=2 SV=1                                                | tr B3KPE6 B3KPE6_HUMAN (+1)    | 74 kDa  | 0  | 2 | 0 | 0 |
| Epidermal growth factor receptor substrate 15-like 1 OS=Homo sapiens GN=EPS15L1 PE=2 SV=1                             | tr B4DME4 B4DME4_HUMAN (+1)    | 84 kDa  | 2  | 0 | 0 | 0 |
| Neuron navigator 2 (Fragment) OS=Homo sapiens GN=NAV2 PE=4 SV=1                                                       | tr E9PNV5 E9PNV5_HUMAN         | 86 kDa  | 0  | 2 | 0 | 0 |
| Testin (Fragment) OS=Homo sapiens GN=TES PE=4 SV=1                                                                    | tr F8W7T0 F8W7T0_HUMAN         | 9 kDa   | 3  | 0 | 3 | 0 |
| Eukaryotic translation initiation factor 5 (Fragment) OS=Homo sapiens GN=EIF5 PE=4 SV=1                               | tr H0YN40 H0YN40_HUMAN (+5)    | 22 kDa  | 4  | 0 | 0 | 0 |
| Fermitin family homolog 3 (Fragment) OS=Homo sapiens GN=FERMT3 PE=4 SV=1                                              | tr H0YFT5 H0YFT5_HUMAN         | 20 kDa  | 2  | 0 | 2 | 0 |
| Serpin B4 (Fragment) OS=Homo sapiens GN=SERPINB4 PE=3 SV=1                                                            | tr H0Y5H9 H0Y5H9_HUMAN (+5)    | 42 kDa  | 3  | 4 | 0 | 0 |
| Valine--tRNA ligase OS=Homo sapiens GN=VARS PE=3 SV=1                                                                 | tr B0V043 B0V043_HUMAN (+5)    | 140 kDa | 0  | 0 | 2 | 0 |
| Leucine--tRNA ligase, cytoplasmic OS=Homo sapiens GN=LARS PE=2 SV=1                                                   | tr B4DER1 B4DER1_HUMAN (+2)    | 131 kDa | 2  | 0 | 3 | 0 |
| Fibrinogen gamma chain OS=Homo sapiens GN=FGG PE=4 SV=1                                                               | tr C9JC84 C9JC84_HUMAN (+3)    | 52 kDa  | 3  | 0 | 0 | 0 |
| Ewing sarcoma breakpoint region 1 OS=Homo sapiens GN=EWSR1 PE=4 SV=1                                                  | tr B0QYK1 B0QYK1_HUMAN (+5)    | 63 kDa  | 0  | 0 | 6 | 0 |
| Keratin, type II cytoskeletal 74 OS=Homo sapiens GN=KRT74 PE=3 SV=1                                                   | tr F8W1S1 F8W1S1_HUMAN         | 59 kDa  | 3  | 0 | 0 | 0 |
| Replication factor C subunit 4 OS=Homo sapiens GN=RFC4 PE=4 SV=1                                                      | tr C9JZ11 C9JZ11_HUMAN (+6)    | 37 kDa  | 0  | 0 | 3 | 2 |
| NSFL1 cofactor p47 OS=Homo sapiens GN=NSFL1C PE=4 SV=1                                                                | tr F2Z2K0 F2Z2K0_HUMAN (+1)    | 30 kDa  | 6  | 0 | 0 | 0 |
| Arf-GAP with SH3 domain, ANK repeat and PH domain-containing protein 1 (Fragment) OS=Homo sapiens GN=ASAP1 PE=4 SV=1  | tr H0YBF7 H0YBF7_HUMAN         | 105 kDa | 0  | 0 | 3 | 0 |

|                                                                                                            |                              |         |   |   |   |   |
|------------------------------------------------------------------------------------------------------------|------------------------------|---------|---|---|---|---|
| Formin-binding protein 1 OS=Homo sapiens GN=FBNBP1 PE=4 SV=1                                               | tr E9PGQ4 E9PGQ4_HUMAN (+2)  | 70 kDa  | 3 | 0 | 3 | 0 |
| EF-hand domain-containing protein D2 (Fragment) OS=Homo sapiens GN=EFHD2 PE=4 SV=1                         | tr H0Y4Y4 H0Y4Y4_HUMAN (+3)  | 19 kDa  | 2 | 0 | 4 | 0 |
| Long-chain-fatty-acid--CoA ligase 1 OS=Homo sapiens GN=ACSL1 PE=2 SV=1                                     | tr B72452 B72452_HUMAN (+5)  | 78 kDa  | 0 | 0 | 5 | 2 |
| Advillin (Fragment) OS=Homo sapiens GN=AVIL PE=4 SV=1                                                      | tr F8VVU1 F8VVU1_HUMAN       | 18 kDa  | 0 | 0 | 7 | 0 |
| Exportin-2 OS=Homo sapiens GN=CSE1L PE=4 SV=1                                                              | tr F8W904 F8W904_HUMAN       | 104 kDa | 8 | 0 | 0 | 0 |
| C-terminal-binding protein 1 (Fragment) OS=Homo sapiens GN=CTBP1 PE=3 SV=1                                 | tr D6RAX2 D6RAX2_HUMAN       | 20 kDa  | 6 | 0 | 3 | 0 |
| Phosphoribosyl pyrophosphate synthase-associated protein 2 OS=Homo sapiens GN=PRPSAP2 PE=2 SV=1            | tr B7ZK21 B7ZK21_HUMAN (+1)  | 36 kDa  | 4 | 0 | 5 | 0 |
| Protein transport protein Sec24B OS=Homo sapiens GN=SEC24B PE=2 SV=1                                       | tr B7ZKM8 B7ZKM8_HUMAN       | 140 kDa | 0 | 0 | 2 | 0 |
| Tubulin tyrosine ligase-like family, member 12 OS=Homo sapiens GN=TLL12 PE=4 SV=1                          | tr B1AH89 B1AH89_HUMAN       | 74 kDa  | 4 | 0 | 0 | 0 |
| N-acetylated-alpha-linked acidic dipeptidase-like protein OS=Homo sapiens GN=NAALADL1 PE=4 SV=1            | tr C9JFW8 C9JFW8_HUMAN (+4)  | 77 kDa  | 0 | 0 | 2 | 0 |
| Structural maintenance of chromosomes protein 6 (Fragment) OS=Homo sapiens GN=SMC6 PE=4 SV=1               | REVtr C9JMN1 C9JMN1_HUMAN    | 85 kDa  | 0 | 0 | 2 | 0 |
| Unconventional myosin-VIIb OS=Homo sapiens GN=MYO7B PE=4 SV=1                                              | tr C9J6C0 C9J6C0_HUMAN (+2)  | 242 kDa | 0 | 0 | 2 | 0 |
| Serine/threonine-protein phosphatase (Fragment) OS=Homo sapiens GN=PPP2CA PE=3 SV=1                        | tr E7ESG8 E7ESG8_HUMAN (+3)  | 17 kDa  | 4 | 0 | 0 | 0 |
| Hsc70-interacting protein (Fragment) OS=Homo sapiens GN=ST13 PE=4 SV=1                                     | tr F6VDH7 F6VDH7_HUMAN       | 18 kDa  | 4 | 0 | 0 | 0 |
| Signal-induced proliferation-associated protein 1 OS=Homo sapiens GN=SIPA1 PE=4 SV=1                       | tr F6RY50 F6RY50_HUMAN (+1)  | 102 kDa | 0 | 0 | 2 | 0 |
| DNA damage-binding protein 1 OS=Homo sapiens GN=DDB1 PE=2 SV=1                                             | tr B4DG00 B4DG00_HUMAN (+2)  | 51 kDa  | 0 | 0 | 3 | 0 |
| RAF proto-oncogene serine/threonine-protein kinase OS=Homo sapiens GN=RAF1 PE=2 SV=1                       | tr B4E0X2 B4E0X2_HUMAN (+1)  | 64 kDa  | 0 | 0 | 2 | 0 |
| Ras-related C3 botulinum toxin substrate 2 (Fragment) OS=Homo sapiens GN=RAC2 PE=3 SV=1                    | tr B1AH78 B1AH78_HUMAN (+6)  | 19 kDa  | 0 | 0 | 7 | 0 |
| Regulator of G-protein-signaling 14 (Fragment) OS=Homo sapiens GN=RG514 PE=4 SV=1                          | tr H0Y8W3 H0Y8W3_HUMAN       | 47 kDa  | 0 | 0 | 4 | 0 |
| Dedicator of cytokinesis protein 2 OS=Homo sapiens GN=DOCK2 PE=4 SV=1                                      | tr E5RFJ0 E5RFJ0_HUMAN (+1)  | 119 kDa | 3 | 0 | 2 | 0 |
| HCG2044799 OS=Homo sapiens GN=hCG_2044799 PE=4 SV=1                                                        | tr H3BQZ7 H3BQZ7_HUMAN       | 85 kDa  | 0 | 0 | 5 | 0 |
| Cysteine and glycine-rich protein 1 OS=Homo sapiens GN=CSRP1 PE=4 SV=1                                     | tr E9PP21 E9PP21_HUMAN (+2)  | 17 kDa  | 3 | 0 | 3 | 0 |
| Dnal1 homolog subfamily B member 6 (Fragment) OS=Homo sapiens GN=DNAJB6 PE=4 SV=1                          | tr C9J2C4 C9J2C4_HUMAN (+7)  | 25 kDa  | 0 | 0 | 3 | 5 |
| Arginine--tRNA ligase, cytoplasmic OS=Homo sapiens GN=RARS PE=4 SV=1                                       | tr F5H378 F5H378_HUMAN       | 52 kDa  | 3 | 0 | 0 | 0 |
| Rho GTPase-activating protein 9 OS=Homo sapiens GN=ARHGAP9 PE=4 SV=1                                       | tr E9PD9X E9PD9X_HUMAN (+3)  | 71 kDa  | 2 | 0 | 2 | 0 |
| Cell division cycle and apoptosis regulator protein 1 (Fragment) OS=Homo sapiens GN=CCAR1 PE=4 SV=1        | tr F5H1H2 F5H1H2_HUMAN (+2)  | 76 kDa  | 4 | 0 | 4 | 0 |
| Eukaryotic translation initiation factor 4 gamma 2 (Fragment) OS=Homo sapiens GN=EIF4G2 PE=4 SV=1          | tr D3DQV9 D3DQV9_HUMAN (+2)  | 102 kDa | 2 | 0 | 0 | 0 |
| Truncated apolipoprotein A-I OS=Homo sapiens GN=APOA1 PE=4 SV=1                                            | tr F8W696 F8W696_HUMAN       | 28 kDa  | 9 | 0 | 0 | 0 |
| Non-POU domain-containing octamer-binding protein (Fragment) OS=Homo sapiens GN=NONO PE=4 SV=1             | tr C9JYS8 C9JYS8_HUMAN       | 30 kDa  | 3 | 0 | 0 | 0 |
| Protein transport protein Sec23A OS=Homo sapiens GN=SEC23A PE=4 SV=1                                       | tr F5H365 F5H365_HUMAN       | 83 kDa  | 0 | 0 | 6 | 0 |
| Guanylate cyclase soluble subunit alpha-3 OS=Homo sapiens GN=GUCY1A3 PE=3 SV=1                             | tr D6RDW3 D6RDW3_HUMAN       | 70 kDa  | 0 | 0 | 2 | 0 |
| Galactokinase OS=Homo sapiens GN=GALK1 PE=2 SV=1                                                           | tr B4E1G6 B4E1G6_HUMAN       | 45 kDa  | 2 | 0 | 0 | 0 |
| Rho GTPase-activating protein 25 OS=Homo sapiens GN=ARHGAP25 PE=4 SV=1                                     | tr C9JB56 C9JB56_HUMAN (+2)  | 38 kDa  | 0 | 0 | 3 | 0 |
| Cytosol aminopeptidase (Fragment) OS=Homo sapiens GN=LAP3 PE=4 SV=1                                        | tr H0Y9Q1 H0Y9Q1_HUMAN       | 23 kDa  | 4 | 0 | 0 | 0 |
| Endoplasmic reticulum protein OS=Homo sapiens GN=HSP90B1 PE=4 SV=1                                         | tr F8W026 F8W026_HUMAN       | 6 kDa   | 4 | 0 | 0 | 0 |
| SAM domain and HD domain-containing protein 1 OS=Homo sapiens GN=SAMHD1 PE=2 SV=2                          | tr A6NDZ3 A6NDZ3_HUMAN (+4)  | 20 kDa  | 0 | 0 | 4 | 0 |
| 14-3-3 protein epsilon OS=Homo sapiens GN=YWHAE PE=4 SV=1                                                  | tr B4DJF2 B4DJF2_HUMAN       | 11 kDa  | 3 | 0 | 0 | 0 |
| Nucleolin (Fragment) OS=Homo sapiens GN=NCL PE=4 SV=1                                                      | tr H7BY16 H7BY16_HUMAN       | 32 kDa  | 2 | 0 | 0 | 2 |
| Heat shock 105kDa/110kDa protein 1, isoform CRA_b OS=Homo sapiens GN=HSPH1 PE=2 SV=1                       | tr B4DYH1 B4DYH1_HUMAN (+1)  | 97 kDa  | 2 | 0 | 0 | 0 |
| Cytokine receptor-like factor 3 OS=Homo sapiens GN=CRLF3 PE=2 SV=1                                         | tr B4DJU5 B4DJU5_HUMAN       | 36 kDa  | 3 | 0 | 0 | 0 |
| Adducin 1 (Alpha) OS=Homo sapiens GN=ADD1 PE=4 SV=1                                                        | tr A2A3N8 A2A3N8_HUMAN (+3)  | 73 kDa  | 3 | 0 | 2 | 0 |
| Tyrosine-protein phosphatase non-receptor type 12 OS=Homo sapiens GN=PTPN12 PE=4 SV=1                      | tr E9PBR5 E9PBR5_HUMAN (+12) | 74 kDa  | 0 | 0 | 3 | 0 |
| Rho GTPase-activating protein 4 OS=Homo sapiens GN=ARHGAP4 PE=4 SV=1                                       | tr E7EQN5 E7EQN5_HUMAN (+5)  | 103 kDa | 0 | 0 | 3 | 0 |
| Poly(rC)-binding protein 2 OS=Homo sapiens GN=PCBP2 PE=2 SV=1                                              | tr B4DXP5 B4DXP5_HUMAN (+3)  | 34 kDa  | 3 | 0 | 2 | 0 |
| Spliceosome RNA helicase DDX39B OS=Homo sapiens GN=DDX39B PE=4 SV=1                                        | tr F8VQ10 F8VQ10_HUMAN (+5)  | 51 kDa  | 3 | 0 | 3 | 0 |
| Epidermal growth factor receptor pathway substrate 15 OS=Homo sapiens GN=EPS15 PE=4 SV=1                   | tr B1AUU8 B1AUU8_HUMAN (+6)  | 84 kDa  | 2 | 0 | 2 | 0 |
| Protein phosphatase 1B (Fragment) OS=Homo sapiens GN=PPM1B PE=3 SV=2                                       | tr B8ZFF0 B8ZFF0_HUMAN (+2)  | 33 kDa  | 3 | 0 | 0 | 0 |
| 26S proteasome non-ATPase regulatory subunit 7 OS=Homo sapiens GN=PSMD7 PE=2 SV=1                          | tr B4DXI8 B4DXI8_HUMAN (+2)  | 28 kDa  | 4 | 0 | 3 | 0 |
| Phosphoribosyl pyrophosphate synthase-associated protein 1 (Fragment) OS=Homo sapiens GN=PRPSAP1 PE=4 SV=1 | tr C9JNQ3 C9JNQ3_HUMAN       | 12 kDa  | 3 | 0 | 4 | 0 |
| Cytoplasmic dynein 1 light intermediate chain 1 OS=Homo sapiens GN=DYNC1L1 PE=4 SV=1                       | tr E9PHI6 E9PHI6_HUMAN       | 43 kDa  | 4 | 0 | 0 | 0 |
| Aspartate--tRNA ligase, cytoplasmic (Fragment) OS=Homo sapiens GN=DARS PE=3 SV=1                           | tr H7BZ35 H7BZ35_HUMAN       | 22 kDa  | 3 | 0 | 0 | 0 |
| 26S protease regulatory subunit 4 OS=Homo sapiens GN=PSMC1 PE=2 SV=1                                       | tr B4DR63 B4DR63_HUMAN       | 41 kDa  | 4 | 0 | 0 | 0 |
| Serine-threonine kinase receptor-associated protein OS=Homo sapiens GN=STRAP PE=2 SV=1                     | tr B4DNJ6 B4DNJ6_HUMAN       | 40 kDa  | 4 | 0 | 5 | 0 |
| Protein TFG OS=Homo sapiens GN=TFG PE=4 SV=1                                                               | tr G5E9V1 G5E9V1_HUMAN       | 43 kDa  | 7 | 0 | 0 | 0 |
| 40S ribosomal protein S3a OS=Homo sapiens GN=RPS3A PE=3 SV=1                                               | tr D6RAT0 D6RAT0_HUMAN (+4)  | 26 kDa  | 0 | 0 | 5 | 0 |
| Exportin-7 OS=Homo sapiens GN=XPO7 PE=4 SV=1                                                               | tr E7ESC6 E7ESC6_HUMAN (+3)  | 124 kDa | 2 | 0 | 0 | 0 |
| Protein phosphatase 1 regulatory subunit 12C OS=Homo sapiens GN=PPP1R12C PE=2 SV=1                         | tr B4DME2 B4DME2_HUMAN (+1)  | 77 kDa  | 0 | 0 | 0 | 2 |
| Voltage-gated potassium channel subunit beta-2 OS=Homo sapiens GN=KCNAB2 PE=4 SV=2                         | tr E7ESI4 E7ESI4_HUMAN       | 18 kDa  | 3 | 0 | 0 | 0 |

TOM1-like protein 2 OS=Homo sapiens GN=TOM1L2 PE=2 SV=1  
 Peptidyl-prolyl cis-trans isomerase OS=Homo sapiens GN=PPIA PE=3 SV=1  
 14-3-3 protein eta (Fragment) OS=Homo sapiens GN=YWHAH PE=4 SV=1  
 Hexokinase-2 OS=Homo sapiens GN=HK2 PE=3 SV=1  
 COP9 signalosome complex subunit 2 OS=Homo sapiens GN=COPS2 PE=2 SV=1  
 Cleavage and polyadenylation-specificity factor subunit 6 OS=Homo sapiens GN=CPSF6 PE=4 SV=1  
 60S ribosomal protein L23a OS=Homo sapiens GN=RPL23A PE=3 SV=1  
 Phosphorylase (Fragment) OS=Homo sapiens GN=PYGB PE=3 SV=1  
 Switch-associated protein 70 OS=Homo sapiens GN=SWAP70 PE=4 SV=1  
 ARP1 actin-related protein 1 homolog B, contractin beta (Yeast), isoform CRA\_c OS=Homo sapiens GN=ACTR1B PE=3 SV=1  
 Cytoplasmic dynein 1 heavy chain 1 (Fragment) OS=Homo sapiens GN=DYNC1H1 PE=4 SV=1  
 Thioredoxin-like 1, isoform CRA\_b OS=Homo sapiens GN=TXNL1 PE=4 SV=1  
 Copine-3 (Fragment) OS=Homo sapiens GN=CPNE3 PE=4 SV=1  
 Proline-serine-threonine phosphatase-interacting protein 1 OS=Homo sapiens GN=PSTPIP1 PE=4 SV=1  
 Eukaryotic translation initiation factor 3 subunit L OS=Homo sapiens GN=EIF3EIP PE=4 SV=1  
 6-phosphofructokinase type C OS=Homo sapiens GN=PFKP PE=2 SV=1  
 Protein phosphatase 1 regulatory subunit 12A (Fragment) OS=Homo sapiens GN=PPP1R12A PE=4 SV=1  
 Importin-5 OS=Homo sapiens GN=IPO5 PE=2 SV=1  
 Coatamer subunit gamma-1 (Fragment) OS=Homo sapiens GN=COPG1 PE=4 SV=1  
 V-type proton ATPase subunit E 1 (Fragment) OS=Homo sapiens GN=ATP6V1E1 PE=4 SV=1  
 Ribose-phosphate pyrophosphokinase 2 OS=Homo sapiens GN=PRPS2 PE=4 SV=1  
 Haptoglobin (Fragment) OS=Homo sapiens GN=HP PE=3 SV=1  
 Hypoxia up-regulated protein 1 OS=Homo sapiens GN=HYOU1 PE=3 SV=1  
 Heat shock 70 kDa protein 4L OS=Homo sapiens GN=HSPA4L PE=3 SV=2  
 Exophilin-5 OS=Homo sapiens GN=EXPH5 PE=4 SV=1  
 Elongator complex protein 1 OS=Homo sapiens GN=IKBKAP PE=4 SV=1  
 Plectin (Fragment) OS=Homo sapiens GN=PLEC PE=4 SV=1  
 Striatin-3 OS=Homo sapiens GN=STRN3 PE=4 SV=1  
 ELAV-like protein 1 OS=Homo sapiens GN=ELAVL1 PE=2 SV=1  
 ATP-dependent RNA helicase DDX19B OS=Homo sapiens GN=DDX19B PE=4 SV=1  
 FAD-AMP lyase (cyclizing) (Fragment) OS=Homo sapiens GN=DAK PE=4 SV=1  
 Phosphatidylinositol 3,4,5-trisphosphate-dependent Rac exchanger 1 protein (Fragment) OS=Homo sapiens GN=PREX1 PE=4 SV=1  
 CAP-Gly domain-containing linker protein 1 (Fragment) OS=Homo sapiens GN=CLIP1 PE=4 SV=1  
 Sorting nexin-2 OS=Homo sapiens GN=SNX2 PE=2 SV=1  
 Mitogen-activated protein kinase 14 OS=Homo sapiens GN=MAPK14 PE=2 SV=1  
 V-type proton ATPase subunit B, kidney isoform OS=Homo sapiens GN=ATP6V1B1 PE=3 SV=1  
 Cytoplasmic dynein 1 intermediate chain 2 OS=Homo sapiens GN=DYNC1I2 PE=2 SV=1  
 Aspartate--tRNA ligase, cytoplasmic (Fragment) OS=Homo sapiens GN=DARS PE=4 SV=1  
 Fructose-bisphosphate aldolase OS=Homo sapiens GN=ALDOC PE=3 SV=1  
 Nuclear receptor-binding protein OS=Homo sapiens GN=NRBP1 PE=4 SV=1  
 Interferon-induced GTP-binding protein Mx1, N-terminally processed OS=Homo sapiens GN=MX1 PE=3 SV=1  
 Matrin-3 OS=Homo sapiens GN=MATR3 PE=4 SV=1  
 ER degradation-enhancing alpha-mannosidase-like 3 (Fragment) OS=Homo sapiens GN=EDEM3 PE=4 SV=1  
 Calcium/calmodulin-dependent protein kinase type II subunit gamma (Fragment) OS=Homo sapiens GN=CAMK2G PE=4 SV=1  
 DENN domain-containing protein 4B (Fragment) OS=Homo sapiens GN=DENND4B PE=4 SV=1  
 Nuclear pore complex-interacting protein-like 3 OS=Homo sapiens GN=NPIPL3 PE=4 SV=1  
 Fibroblast growth factor receptor OS=Homo sapiens GN=FGFR3 PE=3 SV=1  
 Ras GTPase-activating-like protein IQGAP2 OS=Homo sapiens GN=IQGAP2 PE=4 SV=1  
 Coronin OS=Homo sapiens GN=CORO1B PE=3 SV=1  
 Nuclear factor NF-kappa-B p105 subunit (Fragment) OS=Homo sapiens GN=NFKB1 PE=4 SV=1  
 Splicing factor, proline- and glutamine-rich (Fragment) OS=Homo sapiens GN=SFPQ PE=4 SV=1  
 Ubiquitin carboxyl-terminal hydrolase OS=Homo sapiens GN=USP15 PE=3 SV=2  
 Heterogeneous nuclear ribonucleoproteins C1/C2 OS=Homo sapiens GN=HNRNPC PE=2 SV=1  
 WD repeat-containing protein 61 OS=Homo sapiens GN=WDR61 PE=4 SV=1  
 Brefeldin A-inhibited guanine nucleotide-exchange protein 1 OS=Homo sapiens GN=ARFGEF1 PE=4 SV=1  
 4-trimethylaminobutylaldehyde dehydrogenase OS=Homo sapiens GN=ALDH9A1 PE=2 SV=1  
 AMP deaminase 3 OS=Homo sapiens GN=AMPD3 PE=4 SV=1  
 Serine/threonine-protein phosphatase 6 catalytic subunit OS=Homo sapiens GN=PPP6C PE=2 SV=1

|                                 |         |   |   |   |   |
|---------------------------------|---------|---|---|---|---|
| REVtr B7Z2L7 B7Z2L7_HUMAN (+10) | 53 kDa  | 0 | 0 | 2 | 0 |
| tr C9J5S7 C9J5S7_HUMAN (+1)     | 13 kDa  | 3 | 0 | 0 | 0 |
| tr A2IDB2 A2IDB2_HUMAN (+1)     | 19 kDa  | 0 | 0 | 2 | 2 |
| tr E9PB90 E9PB90_HUMAN (+1)     | 99 kDa  | 3 | 0 | 0 | 0 |
| tr B4DIH5 B4DIH5_HUMAN          | 44 kDa  | 0 | 0 | 2 | 0 |
| tr F8WJN3 F8WJN3_HUMAN          | 52 kDa  | 2 | 0 | 0 | 5 |
| tr A8MUS3 A8MUS3_HUMAN (+1)     | 22 kDa  | 0 | 0 | 3 | 0 |
| tr HOY4Z6 HOY4Z6_HUMAN (+1)     | 27 kDa  | 2 | 0 | 3 | 0 |
| tr E7EMB1 E7EMB1_HUMAN (+1)     | 62 kDa  | 3 | 0 | 0 | 0 |
| tr G5E9Q5 G5E9Q5_HUMAN          | 17 kDa  | 4 | 0 | 0 | 0 |
| tr HOYJ21 HOYJ21_HUMAN          | 21 kDa  | 3 | 0 | 0 | 0 |
| tr G3V1K0 G3V1K0_HUMAN          | 19 kDa  | 4 | 0 | 0 | 0 |
| tr E5RG68 E5RG68_HUMAN (+4)     | 27 kDa  | 4 | 0 | 0 | 0 |
| tr C9K004 C9K004_HUMAN (+2)     | 45 kDa  | 3 | 0 | 0 | 0 |
| tr B0QY89 B0QY89_HUMAN (+6)     | 71 kDa  | 4 | 0 | 0 | 0 |
| tr B1APP8 B1APP8_HUMAN (+1)     | 23 kDa  | 3 | 0 | 3 | 0 |
| tr HOYIM2 HOYIM2_HUMAN (+1)     | 22 kDa  | 0 | 0 | 0 | 5 |
| tr B4E0R6 B4E0R6_HUMAN (+1)     | 109 kDa | 4 | 0 | 0 | 0 |
| tr HOY8X7 HOY8X7_HUMAN          | 21 kDa  | 5 | 0 | 3 | 0 |
| tr C9J8H1 C9J8H1_HUMAN          | 24 kDa  | 5 | 0 | 3 | 0 |
| tr D3YTJ7 D3YTJ7_HUMAN          | 22 kDa  | 3 | 0 | 2 | 0 |
| tr H3BS21 H3BS21_HUMAN (+2)     | 25 kDa  | 3 | 0 | 0 | 0 |
| tr E9PL22 E9PL22_HUMAN (+1)     | 105 kDa | 2 | 0 | 0 | 0 |
| tr E7E543 E7E543_HUMAN (+2)     | 98 kDa  | 0 | 0 | 3 | 0 |
| tr E7ENT4 E7ENT4_HUMAN (+3)     | 213 kDa | 0 | 2 | 0 | 0 |
| REVtr F5H2T0 F5H2T0_HUMAN       | 111 kDa | 0 | 0 | 0 | 2 |
| tr E9PMV1 E9PMV1_HUMAN          | 81 kDa  | 0 | 0 | 3 | 0 |
| tr G3V340 G3V340_HUMAN (+1)     | 36 kDa  | 0 | 0 | 2 | 0 |
| tr B4DV88 B4DV88_HUMAN          | 39 kDa  | 2 | 0 | 2 | 0 |
| tr H3BQK0 H3BQK0_HUMAN (+1)     | 55 kDa  | 2 | 0 | 0 | 2 |
| tr HOYCY6 HOYCY6_HUMAN (+2)     | 55 kDa  | 4 | 0 | 0 | 0 |
| tr HOYDZ4 HOYDZ4_HUMAN          | 98 kDa  | 2 | 0 | 0 | 0 |
| tr F5H6A0 F5H6A0_HUMAN (+2)     | 90 kDa  | 0 | 0 | 4 | 0 |
| tr B4DEK4 B4DEK4_HUMAN (+2)     | 46 kDa  | 3 | 0 | 2 | 0 |
| tr B4E0K5 B4E0K5_HUMAN (+9)     | 32 kDa  | 5 | 0 | 0 | 0 |
| tr C9JL73 C9JL73_HUMAN (+4)     | 55 kDa  | 5 | 0 | 0 | 0 |
| tr B7ZA04 B7ZA04_HUMAN (+1)     | 70 kDa  | 4 | 0 | 3 | 0 |
| tr C9J7S3 C9J7S3_HUMAN (+2)     | 20 kDa  | 4 | 0 | 0 | 0 |
| tr A8MVZ9 A8MVZ9_HUMAN          | 36 kDa  | 6 | 0 | 0 | 0 |
| tr F8W6G1 F8W6G1_HUMAN (+3)     | 61 kDa  | 0 | 0 | 2 | 0 |
| tr F8W8T1 F8W8T1_HUMAN          | 73 kDa  | 0 | 0 | 2 | 0 |
| tr A8MXP9 A8MXP9_HUMAN (+8)     | 100 kDa | 0 | 0 | 3 | 0 |
| tr HOY498 HOY498_HUMAN (+1)     | 42 kDa  | 0 | 0 | 2 | 0 |
| tr HOY6G2 HOY6G2_HUMAN (+3)     | 37 kDa  | 2 | 0 | 0 | 0 |
| tr E9PAK5 E9PAK5_HUMAN          | 133 kDa | 0 | 0 | 2 | 0 |
| tr F5H7B8 F5H7B8_HUMAN          | 117 kDa | 2 | 0 | 0 | 0 |
| tr F8W9L4 F8W9L4_HUMAN          | 85 kDa  | 0 | 0 | 2 | 0 |
| tr F5H7S7 F5H7S7_HUMAN (+3)     | 124 kDa | 0 | 0 | 2 | 0 |
| tr E7EW44 E7EW44_HUMAN (+2)     | 32 kDa  | 0 | 3 | 0 | 0 |
| tr D6RF93 D6RF93_HUMAN          | 21 kDa  | 3 | 0 | 0 | 0 |
| tr HOY9K7 HOY9K7_HUMAN (+1)     | 26 kDa  | 0 | 0 | 0 | 3 |
| tr E9PCQ3 E9PCQ3_HUMAN          | 110 kDa | 2 | 0 | 3 | 0 |
| tr B4DSU6 B4DSU6_HUMAN (+12)    | 16 kDa  | 0 | 0 | 2 | 0 |
| tr HOYMF9 HOYMF9_HUMAN (+3)     | 21 kDa  | 2 | 0 | 3 | 0 |
| tr E5RIF2 E5RIF2_HUMAN (+1)     | 143 kDa | 3 | 0 | 0 | 0 |
| tr B4DXY7 B4DXY7_HUMAN          | 46 kDa  | 4 | 0 | 0 | 0 |
| tr E9PKC5 E9PKC5_HUMAN (+4)     | 78 kDa  | 2 | 0 | 2 | 0 |
| tr B7Z3E2 B7Z3E2_HUMAN          | 18 kDa  | 2 | 0 | 0 | 0 |

Cullin-associated NEDD8-dissociated protein 1 (Fragment) OS=Homo sapiens GN=CAND1 PE=4 SV=1  
 Eukaryotic peptide chain release factor subunit 1 OS=Homo sapiens GN=ETF1 PE=2 SV=1  
 Activator of 90 kDa heat shock protein ATPase homolog 1 OS=Homo sapiens GN=AHS1 PE=2 SV=1  
 Phosphatidylinositol 3,4,5-trisphosphate 5-phosphatase 1 (Fragment) OS=Homo sapiens GN=INPP5D PE=4 SV=1  
 Ras GTPase-activating protein-binding protein 1 OS=Homo sapiens GN=G3BP1 PE=4 SV=1  
 DNA-(apurinic or apyrimidinic site) lyase (Fragment) OS=Homo sapiens GN=APEX1 PE=4 SV=1  
 COP9 signalosome complex subunit 6 OS=Homo sapiens GN=COPS6 PE=4 SV=1  
 Proteasome subunit beta type OS=Homo sapiens GN=PSMB9 PE=3 SV=1  
 Sorting nexin 6, isoform CRA\_e OS=Homo sapiens GN=SNX6 PE=2 SV=1  
 Puromycin-sensitive aminopeptidase OS=Homo sapiens GN=NPEPPS PE=4 SV=1  
 DEAD (Asp-Glu-Ala-Asp) box polypeptide 58 OS=Homo sapiens GN=DDX58 PE=4 SV=1  
 Regulator of chromosome condensation (Fragment) OS=Homo sapiens GN=RCC1 PE=4 SV=1  
 WD repeat-containing protein 44 OS=Homo sapiens GN=WDR44 PE=4 SV=1  
 Uncharacterized protein (Fragment) OS=Homo sapiens PE=4 SV=1  
 40S ribosomal protein S3 OS=Homo sapiens GN=RPS3 PE=4 SV=1  
 Fibrinogen beta chain OS=Homo sapiens GN=FGB PE=4 SV=1  
 Alpha-actinin-4 OS=Homo sapiens GN=ACTN4 PE=4 SV=1  
 Replication factor C subunit 5 OS=Homo sapiens GN=RFC5 PE=4 SV=1  
 Copine I OS=Homo sapiens GN=CPNE1 PE=4 SV=1  
 Endoplasmic (Fragment) OS=Homo sapiens GN=HSP90B1 PE=4 SV=1  
 Ribosomal protein S6 kinase alpha-3 OS=Homo sapiens GN=RPS6KA3 PE=2 SV=1  
 Rap1 GTPase-GDP dissociation stimulator 1 OS=Homo sapiens GN=RAP1GDS1 PE=4 SV=1  
 26S proteasome non-ATPase regulatory subunit 4 (Fragment) OS=Homo sapiens GN=PSMD4 PE=4 SV=1  
 Phospholipase A-2-activating protein OS=Homo sapiens GN=PLAA PE=4 SV=1  
 Serine/threonine-protein kinase PAK 1 OS=Homo sapiens GN=PAK1 PE=2 SV=1  
 Proteasome activator complex subunit 1 OS=Homo sapiens GN=PSME1 PE=4 SV=2  
 14-3-3 protein zeta/delta OS=Homo sapiens GN=YWHAZ PE=2 SV=1  
 tRNA-splicing ligase RtcB homolog OS=Homo sapiens GN=C22orf28 PE=4 SV=2  
 Actinin, alpha 2, isoform CRA\_b OS=Homo sapiens GN=ACTN2 PE=2 SV=1  
 Histidine-tRNA ligase, cytoplasmic OS=Homo sapiens GN=HARS PE=4 SV=1  
 Annexin OS=Homo sapiens GN=ANXA5 PE=3 SV=1  
 Actin-related protein 10 OS=Homo sapiens GN=ACTR10 PE=4 SV=1  
 40S ribosomal protein S4, Y isoform 1 (Fragment) OS=Homo sapiens GN=RPS4Y1 PE=4 SV=1  
 Immunoglobulin lambda-like polypeptide 5 OS=Homo sapiens GN=IGLL5 PE=2 SV=2  
 40S ribosomal protein S3a (Fragment) OS=Homo sapiens GN=RPS3A PE=3 SV=1  
 Abl interactor 1 OS=Homo sapiens GN=ABI1 PE=4 SV=2  
 tRNA pseudouridine synthase OS=Homo sapiens GN=PUS1 PE=3 SV=1  
 Coiled-coil domain-containing protein 93 OS=Homo sapiens GN=CCDC93 PE=4 SV=1  
 Myelin expression factor 2 (Fragment) OS=Homo sapiens GN=MYEF2 PE=4 SV=1  
 ATPase, H+ transporting, lysosomal 50/57kDa, V1 subunit H, isoform CRA\_c OS=Homo sapiens GN=ATP6V1H PE=4 SV=1  
 Serine/threonine-protein kinase 3 36kDa subunit OS=Homo sapiens GN=STK3 PE=2 SV=1  
 GRB2-related adapter protein 2 (Fragment) OS=Homo sapiens GN=GRAP2 PE=4 SV=1  
 Coronin OS=Homo sapiens GN=CORO1C PE=2 SV=1  
 Eukaryotic translation initiation factor 3 subunit D (Fragment) OS=Homo sapiens GN=EIF3D PE=4 SV=1  
 Asparagine--tRNA ligase, cytoplasmic OS=Homo sapiens GN=NARS PE=2 SV=1  
 Electron transfer flavoprotein subunit alpha, mitochondrial OS=Homo sapiens GN=ETFA PE=4 SV=1  
 Exportin-1 (Fragment) OS=Homo sapiens GN=XPO1 PE=4 SV=1  
 Proteasome subunit beta type-5 OS=Homo sapiens GN=PSMB5 PE=3 SV=1  
 S-adenosylmethionine synthase OS=Homo sapiens GN=MAT2A PE=2 SV=1  
 Phosphatidylinositol transfer protein beta isoform OS=Homo sapiens GN=PITPNB PE=2 SV=1  
 Serine/threonine-protein phosphatase 2A catalytic subunit beta isoform (Fragment) OS=Homo sapiens GN=PPP2CB PE=4 SV=1  
 T-complex protein 1 subunit eta OS=Homo sapiens GN=CCT7 PE=3 SV=1  
 Nuclear factor NF-kappa-B p105 subunit (Fragment) OS=Homo sapiens GN=NFKB1 PE=4 SV=1  
 Serine/threonine-protein phosphatase 2A 65 kDa regulatory subunit A beta isoform OS=Homo sapiens GN=PPP2R1B PE=4 SV=2  
 Protein phosphatase 1 regulatory subunit 12C OS=Homo sapiens GN=PPP1R12C PE=4 SV=2  
 V-type proton ATPase subunit D OS=Homo sapiens GN=ATP6V1D PE=4 SV=1  
 Eukaryotic translation initiation factor 3 subunit J OS=Homo sapiens GN=EIF3J PE=4 SV=1  
 Arachidonate 15-lipoxygenase OS=Homo sapiens GN=ALOX15 PE=2 SV=1

|                                |         |   |   |   |   |
|--------------------------------|---------|---|---|---|---|
| tr H0YH27 H0YH27_HUMAN         | 50 kDa  | 2 | 0 | 0 | 0 |
| tr B7Z7P8 B7Z7P8_HUMAN         | 47 kDa  | 2 | 0 | 0 | 0 |
| tr B4DU09 B4DU09_HUMAN (+2)    | 32 kDa  | 2 | 0 | 3 | 0 |
| tr H0Y5Q9 H0Y5Q9_HUMAN         | 91 kDa  | 0 | 0 | 4 | 0 |
| tr F5H4D6 F5H4D6_HUMAN         | 31 kDa  | 3 | 0 | 4 | 0 |
| tr G3V359 G3V359_HUMAN (+4)    | 19 kDa  | 3 | 0 | 3 | 0 |
| tr E7EM64 E7EM64_HUMAN         | 36 kDa  | 3 | 0 | 0 | 0 |
| tr A2ACR1 A2ACR1_HUMAN (+1)    | 21 kDa  | 0 | 0 | 3 | 0 |
| tr B4DJ57 B4DJ57_HUMAN         | 34 kDa  | 3 | 0 | 0 | 0 |
| tr E9PLK3 E9PLK3_HUMAN         | 103 kDa | 2 | 0 | 0 | 0 |
| tr A2A376 A2A376_HUMAN (+2)    | 83 kDa  | 0 | 0 | 2 | 0 |
| tr C9JW69 C9JW69_HUMAN (+4)    | 40 kDa  | 0 | 0 | 2 | 0 |
| tr F8W913 F8W913_HUMAN (+1)    | 91 kDa  | 2 | 0 | 0 | 0 |
| tr H0YHG0 H0YHG0_HUMAN         | 59 kDa  | 2 | 0 | 2 | 0 |
| tr E9PL45 E9PL45_HUMAN (+11)   | 18 kDa  | 0 | 0 | 3 | 0 |
| tr D6REL8 D6REL8_HUMAN         | 31 kDa  | 2 | 0 | 0 | 0 |
| tr F5GX52 F5GX52_HUMAN         | 60 kDa  | 0 | 0 | 4 | 0 |
| tr F8W9B4 F8W9B4_HUMAN (+3)    | 29 kDa  | 0 | 0 | 3 | 0 |
| tr A6PVH9 A6PVH9_HUMAN (+4)    | 53 kDa  | 2 | 0 | 0 | 0 |
| tr H0YV0 H0YV0_HUMAN           | 17 kDa  | 2 | 0 | 0 | 0 |
| tr B4DG22 B4DG22_HUMAN (+4)    | 81 kDa  | 2 | 0 | 0 | 0 |
| tr E9PH06 E9PH06_HUMAN (+3)    | 57 kDa  | 3 | 0 | 0 | 0 |
| tr H0Y3Y9 H0Y3Y9_HUMAN (+1)    | 21 kDa  | 2 | 0 | 0 | 0 |
| tr E5RIM3 E5RIM3_HUMAN         | 67 kDa  | 0 | 0 | 2 | 0 |
| tr B3KNX7 B3KNX7_HUMAN (+2)    | 58 kDa  | 4 | 0 | 0 | 0 |
| tr A6NJG9 A6NJG9_HUMAN (+2)    | 29 kDa  | 2 | 0 | 0 | 0 |
| tr B0AZS6 B0AZS6_HUMAN (+4)    | 19 kDa  | 0 | 0 | 0 | 2 |
| tr E7EQS9 E7EQS9_HUMAN         | 19 kDa  | 4 | 0 | 0 | 0 |
| tr B2RCS5 B2RCS5_HUMAN (+1)    | 104 kDa | 0 | 0 | 3 | 0 |
| tr D6REN6 D6REN6_HUMAN (+5)    | 55 kDa  | 4 | 0 | 0 | 0 |
| tr D6RBE9 D6RBE9_HUMAN (+3)    | 25 kDa  | 2 | 0 | 3 | 0 |
| tr F6S9Y6 F6S9Y6_HUMAN (+3)    | 21 kDa  | 2 | 0 | 0 | 0 |
| tr C9JEH7 C9JEH7_HUMAN         | 29 kDa  | 0 | 0 | 4 | 0 |
| sp B9A064 IGLL5_HUMAN (+1)     | 23 kDa  | 4 | 0 | 0 | 0 |
| tr D6RG13 D6RG13_HUMAN (+11)   | 26 kDa  | 2 | 0 | 0 | 0 |
| tr A6NFN2 A6NFN2_HUMAN (+3)    | 55 kDa  | 5 | 0 | 0 | 0 |
| tr F5H1S9 F5H1S9_HUMAN (+1)    | 42 kDa  | 0 | 0 | 2 | 0 |
| tr F8W9X7 F8W9X7_HUMAN         | 73 kDa  | 2 | 0 | 0 | 0 |
| tr H0YN19 H0YN19_HUMAN         | 31 kDa  | 0 | 2 | 0 | 0 |
| tr G3V126 G3V126_HUMAN         | 52 kDa  | 2 | 0 | 2 | 0 |
| tr B3KYA7 B3KYA7_HUMAN (+2)    | 59 kDa  | 2 | 0 | 0 | 0 |
| tr B1AH86 B1AH86_HUMAN (+1)    | 11 kDa  | 2 | 0 | 0 | 0 |
| tr A7MAP1 A7MAP1_HUMAN (+7)    | 59 kDa  | 2 | 2 | 0 | 0 |
| tr B0QYA3 B0QYA3_HUMAN (+2)    | 20 kDa  | 2 | 0 | 0 | 0 |
| tr B4DN60 B4DN60_HUMAN (+1)    | 35 kDa  | 3 | 0 | 0 | 0 |
| REVtr H0YK49 H0YK49_HUMAN (+4) | 24 kDa  | 0 | 3 | 0 | 0 |
| tr C9JW69 C9JW69_HUMAN (+5)    | 21 kDa  | 2 | 0 | 0 | 0 |
| tr E9PAV2 E9PAV2_HUMAN         | 18 kDa  | 3 | 0 | 0 | 0 |
| tr B4DN45 B4DN45_HUMAN         | 33 kDa  | 3 | 0 | 0 | 0 |
| tr B7Z7Q0 B7Z7Q0_HUMAN         | 32 kDa  | 0 | 0 | 2 | 0 |
| tr H0YC23 H0YC23_HUMAN         | 14 kDa  | 4 | 0 | 0 | 0 |
| tr F5GZK5 F5GZK5_HUMAN         | 49 kDa  | 2 | 0 | 0 | 0 |
| tr D6RH30 D6RH30_HUMAN (+1)    | 22 kDa  | 2 | 0 | 0 | 0 |
| tr A8MY67 A8MY67_HUMAN (+1)    | 52 kDa  | 0 | 0 | 2 | 0 |
| tr B5MEC7 B5MEC7_HUMAN         | 78 kDa  | 0 | 3 | 0 | 0 |
| tr G3V559 G3V559_HUMAN (+5)    | 20 kDa  | 2 | 0 | 0 | 0 |
| tr F5H425 F5H425_HUMAN (+1)    | 23 kDa  | 0 | 0 | 2 | 0 |
| tr B7ZA11 B7ZA11_HUMAN (+1)    | 70 kDa  | 2 | 0 | 0 | 0 |

26S proteasome non-ATPase regulatory subunit 4 (Fragment) OS=Homo sapiens GN=PSMD4 PE=4 SV=1  
 Extracellular matrix protein FRAS1 OS=Homo sapiens GN=FRAS1 PE=4 SV=1  
 Collagen alpha-3(VI) chain OS=Homo sapiens GN=COL6A3 PE=4 SV=1  
 Protein FRG1 (Fragment) OS=Homo sapiens GN=FRG1 PE=4 SV=1  
 Regulation of nuclear pre-mRNA domain containing 1B (Fragment) OS=Homo sapiens GN=RPRD1B PE=4 SV=1  
 1-phosphatidylinositol 4,5-bisphosphate phosphodiesterase gamma-2 (Fragment) OS=Homo sapiens GN=PLCG2 PE=4 SV=1  
 Rho GTPase-activating protein 1 (Fragment) OS=Homo sapiens GN=ARHGAP1 PE=4 SV=1  
 Glutathione synthetase OS=Homo sapiens GN=GSS PE=2 SV=1  
 Uncharacterized protein OS=Homo sapiens PE=4 SV=1  
 Splicing factor 3B subunit 2 OS=Homo sapiens GN=SF3B2 PE=4 SV=1  
 DnaJ homolog subfamily A member 1 OS=Homo sapiens GN=DNAJA1 PE=2 SV=1  
 Cleavage and polyadenylation-specificity factor subunit 5 (Fragment) OS=Homo sapiens GN=NUDT21 PE=4 SV=4  
 Mannose-1-phosphate guanyltransferase alpha OS=Homo sapiens GN=GMPPA PE=4 SV=1  
 Isocitrate dehydrogenase [NADP] cytoplasmic (Fragment) OS=Homo sapiens GN=IDH1 PE=3 SV=1  
 Protein transport protein Sec23A OS=Homo sapiens GN=SEC23A PE=4 SV=1  
 Alpha-1-antichymotrypsin OS=Homo sapiens GN=SERPINA3 PE=3 SV=1  
 Ubiquitin carboxyl-terminal hydrolase OS=Homo sapiens GN=USP14 PE=3 SV=2  
 Heat shock cognate 71 kDa protein (Fragment) OS=Homo sapiens GN=HSPA8 PE=3 SV=1  
 Peptidyl-prolyl cis-trans isomerase (Fragment) OS=Homo sapiens GN=FKBP4 PE=4 SV=1  
 GDP dissociation inhibitor 1, isoform CRA\_a OS=Homo sapiens GN=GDI1 PE=4 SV=1  
 Guanine nucleotide-binding protein subunit beta-2-like 1 (Fragment) OS=Homo sapiens GN=GNB2L1 PE=4 SV=1  
 Serine/threonine-protein phosphatase (Fragment) OS=Homo sapiens GN=PPP5C PE=3 SV=1  
 Glucosamine-6-phosphate isomerase 1 OS=Homo sapiens GN=GNPDA1 PE=3 SV=1  
 Zinc finger protein 207 OS=Homo sapiens GN=ZNF207 PE=4 SV=1  
 BRCA1-A complex subunit BRE (Fragment) OS=Homo sapiens GN=BRE PE=4 SV=1  
 DNA polymerase beta OS=Homo sapiens GN=POLB PE=4 SV=1  
 Neurobeachin-like protein 2 (Fragment) OS=Homo sapiens GN=NBEAL2 PE=4 SV=1  
 Small nuclear ribonucleoprotein-associated protein OS=Homo sapiens GN=SNRPN PE=2 SV=1  
 Plectin (Fragment) OS=Homo sapiens GN=PLEC PE=4 SV=1  
 Glycogen synthase kinase-3 alpha OS=Homo sapiens GN=GSK3A PE=4 SV=2  
 Rho guanine nucleotide exchange factor 10 OS=Homo sapiens GN=ARHGEF10 PE=4 SV=1  
 Lymphocyte antigen 6K OS=Homo sapiens GN=LY6K PE=4 SV=2  
 General transcription factor 3C polypeptide 5 OS=Homo sapiens GN=GTF3C5 PE=4 SV=1  
 Phosphatidylinositol 3-kinase regulatory subunit alpha (Fragment) OS=Homo sapiens GN=PIK3R1 PE=4 SV=1  
 UPF0505 protein C16orf62 OS=Homo sapiens GN=C16orf62 PE=4 SV=1  
 Target of Myb protein 1 OS=Homo sapiens GN=TOM1 PE=4 SV=1  
 NF-kappa-B essential modulator OS=Homo sapiens GN=IKBKGE PE=4 SV=2  
 Coatamer subunit zeta-1 OS=Homo sapiens GN=COPZ1 PE=4 SV=1  
 Unconventional myosin-1e (Fragment) OS=Homo sapiens GN=MYO1E PE=4 SV=1  
 Polyribonucleotide 5'-hydroxyl-kinase Clp1 OS=Homo sapiens GN=CLP1 PE=4 SV=1  
 Tyrosine-protein kinase CSK (Fragment) OS=Homo sapiens GN=CSK PE=4 SV=1  
 Histidine ammonia-lyase (Fragment) OS=Homo sapiens GN=HAL PE=4 SV=1

|                              |         |   |   |   |   |
|------------------------------|---------|---|---|---|---|
| tr A6PVX3 A6PVX3_HUMAN       | 22 kDa  | 4 | 0 | 0 | 0 |
| tr E9PHH6 E9PHH6_HUMAN       | 444 kDa | 2 | 0 | 0 | 0 |
| REVtr E9PCV6 E9PCV6_HUMAN    | 322 kDa | 4 | 0 | 0 | 0 |
| tr E9PRR7 E9PRR7_HUMAN (+1)  | 13 kDa  | 0 | 0 | 2 | 0 |
| tr A2A2M0 A2A2M0_HUMAN       | 22 kDa  | 2 | 0 | 0 | 0 |
| tr H3BPZ3 H3BPZ3_HUMAN       | 21 kDa  | 0 | 0 | 2 | 0 |
| tr H0YE29 H0YE29_HUMAN       | 38 kDa  | 2 | 0 | 0 | 0 |
| tr B7Z514 B7Z514_HUMAN (+1)  | 38 kDa  | 2 | 0 | 0 | 0 |
| tr E5RGS7 E5RGS7_HUMAN (+2)  | 14 kDa  | 0 | 0 | 3 | 0 |
| tr E9PPJ0 E9PPJ0_HUMAN (+3)  | 98 kDa  | 2 | 0 | 0 | 0 |
| tr B7Z5C0 B7Z5C0_HUMAN       | 28 kDa  | 0 | 0 | 0 | 2 |
| tr H3BND3 H3BND3_HUMAN       | 17 kDa  | 0 | 0 | 0 | 2 |
| tr F8WD54 F8WD54_HUMAN (+2)  | 32 kDa  | 2 | 0 | 0 | 0 |
| tr C9J4N6 C9J4N6_HUMAN       | 18 kDa  | 2 | 0 | 0 | 0 |
| tr F5H6C4 F5H6C4_HUMAN (+2)  | 74 kDa  | 2 | 0 | 0 | 0 |
| tr G3V5I3 G3V5I3_HUMAN (+12) | 51 kDa  | 2 | 0 | 0 | 0 |
| tr A6NJA2 A6NJA2_HUMAN (+1)  | 51 kDa  | 3 | 0 | 0 | 0 |
| tr E9PI65 E9PI65_HUMAN (+4)  | 18 kDa  | 2 | 0 | 0 | 0 |
| tr F5H1U3 F5H1U3_HUMAN       | 10 kDa  | 2 | 0 | 0 | 0 |
| tr G5E9U5 G5E9U5_HUMAN       | 16 kDa  | 2 | 0 | 0 | 0 |
| tr H0Y8W2 H0Y8W2_HUMAN (+1)  | 30 kDa  | 3 | 0 | 0 | 0 |
| tr H0YDU8 H0YDU8_HUMAN       | 55 kDa  | 3 | 0 | 0 | 0 |
| tr D6R9P4 D6R9P4_HUMAN (+1)  | 31 kDa  | 4 | 0 | 0 | 0 |
| tr E1P660 E1P660_HUMAN       | 53 kDa  | 2 | 0 | 0 | 0 |
| tr C9J2G0 C9J2G0_HUMAN (+1)  | 17 kDa  | 2 | 0 | 0 | 0 |
| tr E5RIJ0 E5RIJ0_HUMAN (+2)  | 22 kDa  | 0 | 0 | 2 | 0 |
| tr H0Y764 H0Y764_HUMAN       | 224 kDa | 2 | 0 | 0 | 0 |
| tr B3KVR1 B3KVR1_HUMAN       | 25 kDa  | 0 | 0 | 0 | 2 |
| tr H0YDN1 H0YDN1_HUMAN       | 24 kDa  | 0 | 0 | 3 | 0 |
| tr A8MT37 A8MT37_HUMAN       | 45 kDa  | 2 | 0 | 0 | 0 |
| tr E9PB39 E9PB39_HUMAN (+1)  | 68 kDa  | 2 | 0 | 0 | 0 |
| tr E5RGJ8 E5RGJ8_HUMAN (+2)  | 11 kDa  | 0 | 0 | 2 | 0 |
| REVtr H7BY84 H7BY84_HUMAN    | 58 kDa  | 0 | 0 | 2 | 0 |
| tr H0YBC2 H0YBC2_HUMAN       | 22 kDa  | 3 | 0 | 0 | 0 |
| tr C9J7I2 C9J7I2_HUMAN (+4)  | 93 kDa  | 2 | 0 | 0 | 0 |
| tr E7EPD0 E7EPD0_HUMAN       | 50 kDa  | 2 | 0 | 0 | 0 |
| tr A8MV29 A8MV29_HUMAN (+4)  | 47 kDa  | 2 | 0 | 0 | 0 |
| tr F8W651 F8W651_HUMAN       | 13 kDa  | 2 | 0 | 0 | 0 |
| tr H0YLE5 H0YLE5_HUMAN       | 22 kDa  | 0 | 0 | 2 | 0 |
| tr E9PL17 E9PL17_HUMAN       | 49 kDa  | 2 | 0 | 0 | 0 |
| tr H3BUM9 H3BUM9_HUMAN       | 12 kDa  | 2 | 0 | 0 | 0 |
| tr F8W0V1 F8W0V1_HUMAN       | 18 kDa  | 2 | 0 | 0 | 0 |



| Identified Proteins (670)                                                                                                                 | Accession Number             | Molecular W | GST_AluFL | GST_GDP | Galpai_Aluf | Galpai_GDP |
|-------------------------------------------------------------------------------------------------------------------------------------------|------------------------------|-------------|-----------|---------|-------------|------------|
| GST-part                                                                                                                                  | GST                          | 26 kDa      | 83        | 90      | 63          | 58         |
| Guanine nucleotide binding protein (G protein), alpha inhibiting activity polypeptide 2, isoform CRA_e OS=Homo sapiens GN=GNAI2 PE=2 SV=1 | tr B3KTZ0 B3KTZ0_HUMAN (+2)  | 39 kDa      | 8         | 9       | 85          | 91         |
| Trypsin precursor                                                                                                                         | gi 136429 sp P00761 TRYP_PIG | 24 kDa      | 20        | 24      | 17          | 16         |
| Guanine nucleotide-binding protein G(t) subunit alpha-3 OS=Homo sapiens GN=GNAT3 PE=2 SV=2                                                | sp A8MTJ3 GNAT3_HUMAN (+4)   | 40 kDa      | 0         | 0       | 4           | 4          |
| Actin, alpha skeletal muscle OS=Homo sapiens GN=ACTA1 PE=3 SV=2                                                                           | tr A6NL76 A6NL76_HUMAN (+1)  | 32 kDa      | 19        | 14      | 29          | 9          |
| Glutathione S-transferase P OS=Homo sapiens GN=GSTP1 PE=3 SV=1                                                                            | tr A8MX94 A8MX94_HUMAN       | 19 kDa      | 9         | 10      | 14          | 16         |
| Filamin-A OS=Homo sapiens GN=FLNA PE=4 SV=2                                                                                               | tr E9PHF0 E9PHF0_HUMAN       | 83 kDa      | 58        | 4       | 74          | 9          |
| Actinin alpha 1 isoform 3 OS=Homo sapiens GN=ACTN1 PE=2 SV=1                                                                              | tr B7TY16 B7TY16_HUMAN (+3)  | 107 kDa     | 52        | 6       | 75          | 4          |
| Actin, cytoplasmic 1 (Fragment) OS=Homo sapiens GN=ACTB PE=3 SV=1                                                                         | tr E7EVS6 E7EVS6_HUMAN (+13) | 18 kDa      | 34        | 6       | 17          | 18         |
| Heat shock cognate 71 kDa protein OS=Homo sapiens GN=HSPA8 PE=3 SV=1                                                                      | tr E9PKE3 E9PKE3_HUMAN (+7)  | 69 kDa      | 42        | 35      | 29          | 19         |
| Filamin-A (Fragment) OS=Homo sapiens GN=FLNA PE=4 SV=2                                                                                    | tr F8WE98 F8WE98_HUMAN       | 67 kDa      | 26        | 6       | 28          | 6          |
| Tubulin beta chain OS=Homo sapiens GN=TUBB PE=3 SV=1                                                                                      | tr F8VYX6 F8VYX6_HUMAN (+14) | 48 kDa      | 40        | 2       | 40          | 27         |
| Coronin OS=Homo sapiens GN=CORO1A PE=3 SV=1                                                                                               | tr H3BRY3 H3BRY3_HUMAN (+5)  | 43 kDa      | 9         | 30      | 12          | 16         |
| Ras GTPase-activating-like protein IQGAP1 OS=Homo sapiens GN=IQGAP1 PE=4 SV=1                                                             | tr H0YLE8 H0YLE8_HUMAN       | 125 kDa     | 37        | 0       | 60          | 5          |
| Ras GTPase-activating protein 3 OS=Homo sapiens GN=RASA3 PE=2 SV=1                                                                        | tr F8WGX8 F8WGX8_HUMAN       | 92 kDa      | 2         | 0       | 34          | 12         |
| Carbonyl reductase 1, isoform CRA_c OS=Homo sapiens GN=CBR1 PE=2 SV=1                                                                     | tr B4DFK7 B4DFK7_HUMAN (+2)  | 19 kDa      | 6         | 4       | 6           | 6          |
| Plastin-3 OS=Homo sapiens GN=PLS3 PE=2 SV=1                                                                                               | tr B4DGB4 B4DGB4_HUMAN (+5)  | 69 kDa      | 11        | 7       | 12          | 2          |
| Pyruvate kinase (Fragment) OS=Homo sapiens GN=PKM PE=3 SV=1                                                                               | tr H3BTN5 H3BTN5_HUMAN (+5)  | 53 kDa      | 36        | 8       | 7           | 7          |
| Actin-related protein 2 OS=Homo sapiens GN=ACTR2 PE=3 SV=1                                                                                | tr E9PF41 E9PF41_HUMAN (+1)  | 45 kDa      | 20        | 6       | 24          | 7          |
| Actin, gamma-enteric smooth muscle OS=Homo sapiens GN=ACTG2 PE=3 SV=1                                                                     | tr E9PG30 E9PG30_HUMAN (+6)  | 37 kDa      | 3         | 3       | 8           | 6          |
| 14-3-3 protein zeta/delta (Fragment) OS=Homo sapiens GN=YWHAZ PE=3 SV=1                                                                   | tr E7EX29 E7EX29_HUMAN (+4)  | 28 kDa      | 14        | 2       | 13          | 16         |
| Spectrin alpha chain, non-erythrocytic 1 OS=Homo sapiens GN=SPTAN1 PE=4 SV=2                                                              | tr A6NG51 A6NG51_HUMAN       | 285 kDa     | 25        | 0       | 53          | 0          |
| Actin-related protein 3 OS=Homo sapiens GN=ACTR3 PE=2 SV=1                                                                                | tr B4DXW1 B4DXW1_HUMAN (+2)  | 42 kDa      | 21        | 6       | 21          | 5          |
| Glutathione S-transferase Mu 1 OS=Homo sapiens GN=GSTM1 PE=4 SV=1                                                                         | tr B9ZVX7 B9ZVX7_HUMAN (+2)  | 17 kDa      | 2         | 0       | 11          | 6          |
| Phosphorylase OS=Homo sapiens GN=PYGL PE=3 SV=1                                                                                           | tr E9PK47 E9PK47_HUMAN       | 94 kDa      | 19        | 0       | 21          | 2          |
| LIM and SH3 domain protein 1 (Fragment) OS=Homo sapiens GN=LASP1 PE=4 SV=1                                                                | tr C9J9W2 C9J9W2_HUMAN       | 19 kDa      | 9         | 3       | 13          | 3          |
| DNA damage-binding protein 1 OS=Homo sapiens GN=DDB1 PE=4 SV=1                                                                            | tr F5GY55 F5GY55_HUMAN (+3)  | 122 kDa     | 9         | 12      | 34          | 12         |
| Tubulin alpha-4A chain OS=Homo sapiens GN=TUBA4A PE=2 SV=1                                                                                | tr A8MUB1 A8MUB1_HUMAN (+9)  | 48 kDa      | 20        | 0       | 21          | 5          |
| Glutathione S-transferase Mu 2 OS=Homo sapiens GN=GSTM2 PE=3 SV=1                                                                         | tr E9PEM9 E9PEM9_HUMAN (+4)  | 23 kDa      | 4         | 6       | 3           | 3          |
| Serum albumin OS=Homo sapiens GN=ALB PE=4 SV=1                                                                                            | tr B7WNR0 B7WNR0_HUMAN (+3)  | 56 kDa      | 26        | 4       | 4           | 0          |
| Keratin, type II cytoskeletal 5 (Fragment) OS=Homo sapiens GN=KRT5 PE=4 SV=1                                                              | tr F8WOC6 F8WOC6_HUMAN (+5)  | 21 kDa      | 12        | 6       | 0           | 6          |
| Plastin-2 OS=Homo sapiens GN=LCP1 PE=2 SV=1                                                                                               | tr B4DUA0 B4DUA0_HUMAN       | 22 kDa      | 6         | 3       | 7           | 2          |
| Glyceraldehyde-3-phosphate dehydrogenase OS=Homo sapiens GN=GAPDH PE=3 SV=1                                                               | tr E7EUT4 E7EUT4_HUMAN (+1)  | 32 kDa      | 13        | 0       | 10          | 8          |
| Fructose-bisphosphate aldolase OS=Homo sapiens GN=ALDOA PE=3 SV=1                                                                         | tr H3BQN4 H3BQN4_HUMAN (+2)  | 39 kDa      | 17        | 6       | 12          | 6          |
| Myosin-10 OS=Homo sapiens GN=MYH10 PE=4 SV=1                                                                                              | tr F8VTL3 F8VTL3_HUMAN (+2)  | 233 kDa     | 9         | 11      | 16          | 8          |
| Vimentin OS=Homo sapiens GN=VIM PE=3 SV=1                                                                                                 | tr B0YJC4 B0YJC4_HUMAN (+1)  | 50 kDa      | 17        | 0       | 10          | 16         |
| Cofilin-1 OS=Homo sapiens GN=CFL1 PE=4 SV=1                                                                                               | tr E9PK25 E9PK25_HUMAN (+5)  | 23 kDa      | 22        | 4       | 12          | 4          |
| Tubulin alpha-1C chain OS=Homo sapiens GN=TUBA1C PE=3 SV=1                                                                                | tr F5H5D3 F5H5D3_HUMAN (+6)  | 58 kDa      | 10        | 5       | 5           | 15         |
| Probable ATP-dependent RNA helicase DDX17 OS=Homo sapiens GN=DDX17 PE=3 SV=1                                                              | tr H3BLZ8 H3BLZ8_HUMAN (+2)  | 80 kDa      | 9         | 14      | 11          | 12         |
| Heat shock 70 kDa protein 1A/1B OS=Homo sapiens GN=HSPA1B PE=3 SV=1                                                                       | tr F8VZJ4 F8VZJ4_HUMAN       | 68 kDa      | 15        | 15      | 12          | 5          |
| Immunoglobulin-like and fibronectin type III domain-containing protein 1 OS=Homo sapiens GN=IGFN1 PE=4 SV=1                               | tr F8WAI1 F8WAI1_HUMAN       | 384 kDa     | 0         | 2       | 2           | 0          |
| Talin-2 (Fragment) OS=Homo sapiens GN=TLN2 PE=4 SV=1                                                                                      | tr H0YMT1 H0YMT1_HUMAN (+1)  | 155 kDa     | 8         | 0       | 7           | 5          |
| Myosin-14 OS=Homo sapiens GN=MYH14 PE=4 SV=1                                                                                              | tr F2Z2U8 F2Z2U8_HUMAN (+1)  | 231 kDa     | 6         | 8       | 7           | 6          |
| Keratin-81-like protein KRT121P OS=Homo sapiens GN=KRT121P PE=5 SV=4                                                                      | sp A6NCN2 K121P_HUMAN (+1)   | 29 kDa      | 13        | 24      | 0           | 0          |
| Septin-7 OS=Homo sapiens GN=SEPT7 PE=3 SV=1                                                                                               | tr E7EPK1 E7EPK1_HUMAN (+17) | 51 kDa      | 24        | 0       | 21          | 2          |
| Eukaryotic initiation factor 4A-II OS=Homo sapiens GN=EIF4A2 PE=3 SV=1                                                                    | tr E7EQG2 E7EQG2_HUMAN (+2)  | 41 kDa      | 10        | 7       | 10          | 6          |
| Keratin, type II cytoskeletal 1b OS=Homo sapiens GN=KRT77 PE=3 SV=1                                                                       | tr F5GY66 F5GY66_HUMAN       | 38 kDa      | 6         | 2       | 3           | 3          |
| POTE ankyrin domain family member F OS=Homo sapiens GN=POTEF PE=1 SV=2                                                                    | sp A5A3E0 POTEF_HUMAN        | 121 kDa     | 6         | 0       | 3           | 0          |
| Keratin, type I cuticular Ha5 OS=Homo sapiens GN=KRT35 PE=3 SV=1                                                                          | tr C4AM86 C4AM86_HUMAN (+3)  | 48 kDa      | 6         | 21      | 0           | 0          |
| Ankyrin repeat and BTB/POZ domain-containing protein BTBD11 OS=Homo sapiens GN=BTBD11 PE=2 SV=3                                           | sp A6QL63 BTBDB_HUMAN (+5)   | 121 kDa     | 0         | 0       | 0           | 25         |
| Filamin-B OS=Homo sapiens GN=FLNB PE=4 SV=1                                                                                               | tr E7EN95 E7EN95_HUMAN (+15) | 256 kDa     | 12        | 0       | 32          | 0          |
| Keratin, type II cytoskeletal 5 (Fragment) OS=Homo sapiens GN=KRT5 PE=3 SV=1                                                              | tr H0YI76 H0YI76_HUMAN (+1)  | 23 kDa      | 13        | 7       | 0           | 4          |
| Annexin (Fragment) OS=Homo sapiens GN=ANXA2 PE=3 SV=1                                                                                     | tr H0YMD0 H0YMD0_HUMAN (+14) | 25 kDa      | 11        | 5       | 14          | 6          |
| Putative protein FAM90A7P OS=Homo sapiens GN=FAM90A7P PE=5 SV=1                                                                           | sp A6NKC0 F90A7_HUMAN (+11)  | 50 kDa      | 0         | 0       | 2           | 0          |
| Junction plakoglobin OS=Homo sapiens GN=JUP PE=3 SV=1                                                                                     | tr F5GW58 F5GW58_HUMAN (+4)  | 66 kDa      | 6         | 5       | 2           | 3          |
| Phosphoglycerate kinase OS=Homo sapiens GN=PGK1 PE=2 SV=1                                                                                 | tr B7Z7A9 B7Z7A9_HUMAN       | 41 kDa      | 17        | 7       | 13          | 5          |
| WD repeat-containing protein 1 (Fragment) OS=Homo sapiens GN=WDR1 PE=4 SV=1                                                               | tr D6RD66 D6RD66_HUMAN       | 27 kDa      | 11        | 4       | 3           | 0          |

|                                                                                                         |                                |          |    |   |    |    |
|---------------------------------------------------------------------------------------------------------|--------------------------------|----------|----|---|----|----|
| Ras GTPase-activating-like protein IQGAP2 (Fragment) OS=Homo sapiens GN=IQGAP2 PE=4 SV=1                | tr E7EWC2 E7EWC2_HUMAN (+1)    | 160 kDa  | 10 | 0 | 16 | 0  |
| Cytoplasmic FMR1-interacting protein 2 OS=Homo sapiens GN=CYFIP2 PE=4 SV=1                              | tr E7EVF4 E7EVF4_HUMAN (+5)    | 146 kDa  | 15 | 0 | 18 | 0  |
| Heat shock protein HSP 90-alpha (Fragment) OS=Homo sapiens GN=HSP90AA1 PE=4 SV=1                        | tr G3V2J8 G3V2J8_HUMAN         | 20 kDa   | 11 | 2 | 5  | 3  |
| Transketolase OS=Homo sapiens GN=TKT PE=2 SV=1                                                          | tr B4E022 B4E022_HUMAN (+3)    | 63 kDa   | 15 | 5 | 5  | 3  |
| Keratin, type II cuticular Hb5 OS=Homo sapiens GN=KRT85 PE=3 SV=1                                       | tr F5GYI5 F5GYI5_HUMAN         | 33 kDa   | 12 | 9 | 0  | 0  |
| Heterogeneous nuclear ribonucleoprotein A1 OS=Homo sapiens GN=HNRNPA1 PE=4 SV=1                         | tr F8VRQ1 F8VRQ1_HUMAN (+8)    | 33 kDa   | 5  | 0 | 6  | 3  |
| L-lactate dehydrogenase (Fragment) OS=Homo sapiens GN=LDHB PE=3 SV=1                                    | tr A8MW50 A8MW50_HUMAN (+2)    | 25 kDa   | 7  | 3 | 7  | 5  |
| ATP-citrate synthase OS=Homo sapiens GN=ACLY PE=2 SV=1                                                  | tr B4E3P0 B4E3P0_HUMAN         | 91 kDa   | 14 | 0 | 17 | 0  |
| UTP-glucose-1-phosphate uridylyltransferase OS=Homo sapiens GN=UGP2 PE=4 SV=1                           | tr E7EUC7 E7EUC7_HUMAN (+11)   | 58 kDa   | 16 | 0 | 8  | 0  |
| Nesprin-1 OS=Homo sapiens GN=SYNE1 PE=4 SV=1                                                            | REVtr E9PEL9 E9PEL9_HUMAN (+5) | 1005 kDa | 0  | 2 | 0  | 0  |
| Proliferation-associated protein 2G4 OS=Homo sapiens GN=PA2G4 PE=4 SV=1                                 | tr F8VTY8 F8VTY8_HUMAN         | 42 kDa   | 6  | 6 | 9  | 4  |
| 6-phosphogluconate dehydrogenase, decarboxylating OS=Homo sapiens GN=PGD PE=2 SV=1                      | tr B4DQJ8 B4DQJ8_HUMAN (+1)    | 52 kDa   | 8  | 3 | 3  | 3  |
| Hematopoietic lineage cell-specific protein OS=Homo sapiens GN=HCLS1 PE=4 SV=1                          | tr E7EVW7 E7EVW7_HUMAN         | 50 kDa   | 10 | 3 | 12 | 2  |
| Elongation factor 1-gamma OS=Homo sapiens GN=EEF1G PE=2 SV=1                                            | tr B4DTG2 B4DTG2_HUMAN (+1)    | 56 kDa   | 9  | 3 | 8  | 5  |
| Gelsolin OS=Homo sapiens GN=GSN PE=4 SV=1                                                               | tr F5H1A8 F5H1A8_HUMAN         | 81 kDa   | 10 | 6 | 6  | 5  |
| Nesprin-1 OS=Homo sapiens GN=SYNE1 PE=4 SV=1                                                            | tr E9PEL9 E9PEL9_HUMAN (+14)   | 1005 kDa | 2  | 0 | 0  | 0  |
| Actin-related protein 2/3 complex subunit 1B OS=Homo sapiens GN=ARPC1B PE=4 SV=1                        | tr F8WCG3 F8WCG3_HUMAN (+5)    | 25 kDa   | 9  | 0 | 6  | 0  |
| Alpha actinin 4 short isoform OS=Homo sapiens GN=ACTN4 PE=2 SV=1                                        | tr D6PXX4 D6PXX4_HUMAN (+1)    | 80 kDa   | 8  | 0 | 14 | 0  |
| Septin 6 OS=Homo sapiens GN=SEPT6 PE=3 SV=1                                                             | tr B1AMS2 B1AMS2_HUMAN (+5)    | 49 kDa   | 14 | 0 | 12 | 0  |
| Actin, cytoplasmic 1 OS=Homo sapiens GN=ACTB PE=3 SV=1                                                  | tr G5E9R0 G5E9R0_HUMAN (+10)   | 14 kDa   | 7  | 0 | 5  | 0  |
| Fermitin family homolog 3 (Fragment) OS=Homo sapiens GN=FERMT3 PE=4 SV=1                                | tr F5H1C6 F5H1C6_HUMAN (+1)    | 33 kDa   | 6  | 5 | 6  | 5  |
| T-complex protein 1 subunit gamma OS=Homo sapiens GN=CCT3 PE=2 SV=1                                     | tr B4DUR8 B4DUR8_HUMAN (+11)   | 56 kDa   | 11 | 0 | 6  | 3  |
| Tropomyosin alpha-3 chain OS=Homo sapiens GN=TPM3 PE=4 SV=1                                             | tr D6R904 D6R904_HUMAN         | 11 kDa   | 5  | 7 | 7  | 6  |
| T-complex protein 1 subunit theta OS=Homo sapiens GN=CCT8 PE=2 SV=1                                     | tr B4DEM7 B4DEM7_HUMAN (+2)    | 58 kDa   | 19 | 0 | 2  | 2  |
| Pro-interleukin-16 (Fragment) OS=Homo sapiens GN=IL16 PE=4 SV=2                                         | tr H0YLH9 H0YLH9_HUMAN (+1)    | 65 kDa   | 4  | 4 | 8  | 4  |
| Uncharacterized protein OS=Homo sapiens GN=VCL PE=2 SV=1                                                | tr B4DTM7 B4DTM7_HUMAN         | 36 kDa   | 10 | 4 | 8  | 2  |
| Actin-related protein 2/3 complex subunit 4 OS=Homo sapiens GN=ARPC4 PE=4 SV=1                          | tr C9JWM7 C9JWM7_HUMAN (+3)    | 22 kDa   | 6  | 3 | 5  | 3  |
| Coatomer protein complex, subunit beta 2 (Beta prime), isoform CRA_b OS=Homo sapiens GN=COPB2 PE=2 SV=1 | tr B4DZ18 B4DZ18_HUMAN         | 99 kDa   | 8  | 6 | 10 | 5  |
| Integrin-linked protein kinase OS=Homo sapiens GN=ILK PE=2 SV=1                                         | tr B7Z418 B7Z418_HUMAN (+1)    | 44 kDa   | 9  | 0 | 8  | 0  |
| C4b-B OS=Homo sapiens GN=C4B PE=4 SV=1                                                                  | tr F5GX50 F5GX50_HUMAN (+12)   | 188 kDa  | 2  | 0 | 0  | 0  |
| Caldesmon OS=Homo sapiens GN=CALD1 PE=4 SV=1                                                            | tr E7EX44 E7EX44_HUMAN (+3)    | 64 kDa   | 5  | 2 | 13 | 0  |
| LanC-like protein 1 (Fragment) OS=Homo sapiens GN=LANCL1 PE=4 SV=1                                      | tr E9PH50 E9PH50_HUMAN         | 22 kDa   | 2  | 2 | 3  | 4  |
| Radixin OS=Homo sapiens GN=RDX PE=2 SV=1                                                                | tr A7YJ8 A7YJ8_HUMAN (+4)      | 71 kDa   | 10 | 0 | 3  | 0  |
| ATP-dependent RNA helicase DDX3Y OS=Homo sapiens GN=DDX3Y PE=2 SV=1                                     | tr B4DXX7 B4DXX7_HUMAN (+1)    | 73 kDa   | 5  | 0 | 7  | 13 |
| Synembryn-A (Fragment) OS=Homo sapiens GN=RIC8A PE=4 SV=1                                               | tr H0YEN0 H0YEN0_HUMAN (+1)    | 32 kDa   | 0  | 0 | 3  | 3  |
| Capping protein (Actin filament) muscle Z-line, beta OS=Homo sapiens GN=CAPZB PE=4 SV=1                 | tr B1AK87 B1AK87_HUMAN (+3)    | 29 kDa   | 9  | 0 | 6  | 2  |
| T-complex protein 1 subunit beta OS=Homo sapiens GN=CCT2 PE=3 SV=2                                      | tr F5GW6F F5GW6F_HUMAN (+1)    | 57 kDa   | 14 | 0 | 0  | 0  |
| T-complex protein 1 subunit eta OS=Homo sapiens GN=CCT7 PE=3 SV=1                                       | tr B8Z2C9 B8Z2C9_HUMAN (+2)    | 55 kDa   | 13 | 0 | 0  | 0  |
| ATP-binding cassette sub-family A member 2 OS=Homo sapiens GN=ABCA2 PE=4 SV=1                           | tr E9PGB2 E9PGB2_HUMAN (+1)    | 108 kDa  | 0  | 0 | 0  | 2  |
| T-complex protein 1 subunit zeta OS=Homo sapiens GN=CCT6A PE=2 SV=1                                     | tr B4DPJ8 B4DPJ8_HUMAN (+1)    | 55 kDa   | 10 | 0 | 5  | 0  |
| Eukaryotic translation initiation factor 4 gamma 1 OS=Homo sapiens GN=EIF4G1 PE=4 SV=1                  | tr E9PFM1 E9PFM1_HUMAN (+9)    | 176 kDa  | 5  | 0 | 9  | 0  |
| T-complex protein 1 subunit delta OS=Homo sapiens GN=CCT4 PE=2 SV=1                                     | tr B7Z9L0 B7Z9L0_HUMAN         | 52 kDa   | 14 | 0 | 4  | 3  |
| Spectrin beta chain, non-erythrocytic 1 (Fragment) OS=Homo sapiens GN=SPTBN1 PE=4 SV=1                  | tr F8W6C1 F8W6C1_HUMAN         | 81 kDa   | 10 | 0 | 12 | 0  |
| Ezrin OS=Homo sapiens GN=EZR PE=4 SV=2                                                                  | tr E7EQR4 E7EQR4_HUMAN (+2)    | 66 kDa   | 4  | 2 | 11 | 3  |
| Dynamins-2 OS=Homo sapiens GN=DNM2 PE=3 SV=1                                                            | tr E9PEQ4 E9PEQ4_HUMAN (+1)    | 98 kDa   | 16 | 0 | 3  | 0  |
| Filamin-A (Fragment) OS=Homo sapiens GN=FLNA PE=4 SV=1                                                  | tr H0Y5F3 H0Y5F3_HUMAN         | 25 kDa   | 4  | 0 | 5  | 0  |
| Microtubule-actin cross-linking factor 1, isoforms 1/2/3/5 OS=Homo sapiens GN=MACF1 PE=4 SV=1           | tr H3BPE1 H3BPE1_HUMAN (+6)    | 857 kDa  | 0  | 0 | 3  | 0  |
| Disks large homolog 1 OS=Homo sapiens GN=DLG1 PE=4 SV=1                                                 | tr E7EWL7 E7EWL7_HUMAN (+2)    | 88 kDa   | 0  | 2 | 0  | 0  |
| Keratin, type II cytoskeletal 5 (Fragment) OS=Homo sapiens GN=KRT5 PE=4 SV=1                            | tr F8VV57 F8VV57_HUMAN (+1)    | 12 kDa   | 3  | 2 | 0  | 2  |
| Spectrin alpha chain, non-erythrocytic 1 OS=Homo sapiens GN=SPTAN1 PE=4 SV=2                            | REVtr A6NG51 A6NG51_HUMAN      | 285 kDa  | 0  | 0 | 2  | 0  |
| Septin-1 (Fragment) OS=Homo sapiens GN=SEPT1 PE=3 SV=1                                                  | tr H3BS29 H3BS29_HUMAN (+1)    | 35 kDa   | 6  | 0 | 7  | 0  |
| Keratin, type II cytoskeletal 4 OS=Homo sapiens GN=KRT4 PE=3 SV=1                                       | tr F5H8K9 F5H8K9_HUMAN         | 54 kDa   | 7  | 0 | 0  | 0  |
| E3 ubiquitin-protein ligase RNF213 OS=Homo sapiens GN=RNF213 PE=4 SV=1                                  | tr H3BLU6 H3BLU6_HUMAN (+6)    | 374 kDa  | 0  | 0 | 2  | 0  |
| HCG1983504, isoform CRA_f OS=Homo sapiens GN=TUBB3 PE=2 SV=1                                            | tr A8K854 A8K854_HUMAN         | 42 kDa   | 6  | 0 | 5  | 4  |
| RuvB-like 2 OS=Homo sapiens GN=RUVBL2 PE=2 SV=1                                                         | tr B3KQ59 B3KQ59_HUMAN         | 46 kDa   | 10 | 0 | 7  | 7  |
| Protein PRRC2A OS=Homo sapiens GN=PRRC2A PE=4 SV=1                                                      | tr C9J1F6 C9J1F6_HUMAN (+12)   | 227 kDa  | 0  | 0 | 0  | 3  |
| Enolase (Fragment) OS=Homo sapiens GN=ENO3 PE=3 SV=1                                                    | tr E5RGZ4 E5RGZ4_HUMAN (+8)    | 30 kDa   | 6  | 3 | 5  | 4  |
| Non-POU domain-containing octamer-binding protein OS=Homo sapiens GN=NONO PE=4 SV=1                     | tr F5GYZ3 F5GYZ3_HUMAN (+2)    | 44 kDa   | 0  | 6 | 0  | 6  |

Homer protein homolog 3 OS=Homo sapiens GN=HOMER3 PE=4 SV=1  
Heterogeneous nuclear ribonucleoprotein D0 OS=Homo sapiens GN=HNRNPD PE=2 SV=1  
E3 ubiquitin-protein ligase HUWE1 (Fragment) OS=Homo sapiens GN=HUWE1 PE=4 SV=1  
Rab GDP dissociation inhibitor beta OS=Homo sapiens GN=GDI2 PE=4 SV=1  
Tenascin XB OS=Homo sapiens GN=TNXB PE=4 SV=1  
Tubulin polyglutamylase TLL4 OS=Homo sapiens GN=TLL4 PE=4 SV=1  
Protein phosphatase 1 regulatory subunit 12A (Fragment) OS=Homo sapiens GN=PPP1R12A PE=4 SV=1  
26S proteasome non-ATPase regulatory subunit 2 OS=Homo sapiens GN=PSMD2 PE=4 SV=1  
Tubulin alpha-1A chain OS=Homo sapiens GN=TUBA1A PE=3 SV=1  
Synembryn-A (Fragment) OS=Homo sapiens GN=RIC8A PE=4 SV=1  
Actin-related protein 2/3 complex subunit 2 (Fragment) OS=Homo sapiens GN=ARPC2 PE=4 SV=1  
Rho-associated protein kinase 2 OS=Homo sapiens GN=ROCK2 PE=4 SV=1  
Echinoderm microtubule-associated protein-like 4 OS=Homo sapiens GN=EML4 PE=4 SV=2  
Diaphanous homolog 1 (Drosophila), isoform CRA\_a OS=Homo sapiens GN=DIAPH1 PE=4 SV=1  
26S protease regulatory subunit 6A OS=Homo sapiens GN=PSMC3 PE=3 SV=1  
Kaliocin-1 (Fragment) OS=Homo sapiens GN=LTF PE=4 SV=1  
Minor histocompatibility antigen HA-1 OS=Homo sapiens GN=HMHA1 PE=4 SV=1  
Regulator of G-protein-signaling 3 OS=Homo sapiens GN=RG53 PE=2 SV=1  
Interferon alpha/beta receptor 2 (Fragment) OS=Homo sapiens GN=IFNAR2 PE=4 SV=1  
TRIO and F-actin-binding protein OS=Homo sapiens GN=TRIOBP PE=4 SV=1  
Coronin OS=Homo sapiens GN=CORO7 PE=2 SV=1  
26S protease regulatory subunit 8 OS=Homo sapiens GN=PSMC5 PE=2 SV=1  
Elongation factor 1-alpha 1 (Fragment) OS=Homo sapiens GN=EEF1A1 PE=4 SV=1  
F-actin-capping protein subunit alpha-2 OS=Homo sapiens GN=CAPZA2 PE=2 SV=1  
Dynactin subunit 1 OS=Homo sapiens GN=DCTN1 PE=4 SV=2  
Adenosylhomocysteinase OS=Homo sapiens GN=AHCY PE=3 SV=1  
Extracellular signal-regulated kinase-2 splice variant OS=Homo sapiens GN=MAPK1 PE=2 SV=1  
Nebulin OS=Homo sapiens GN=NEB PE=4 SV=1  
Dedicator of cytokinesis protein 11 OS=Homo sapiens GN=DOCK11 PE=4 SV=2  
Dedicator of cytokinesis protein 2 OS=Homo sapiens GN=DOCK2 PE=4 SV=1  
Protein transport protein Sec31A OS=Homo sapiens GN=SEC31A PE=2 SV=1  
T-complex protein 1 subunit alpha OS=Homo sapiens GN=TCP1 PE=3 SV=1  
RAS p21 protein activator 2, isoform CRA\_b OS=Homo sapiens GN=RASA2 PE=4 SV=1  
Heterogeneous nuclear ribonucleoprotein H OS=Homo sapiens GN=HNRNPH1 PE=4 SV=1  
Nesprin-2 OS=Homo sapiens GN=SYNE2 PE=4 SV=1  
DNA-directed RNA polymerase OS=Homo sapiens GN=POLR2B PE=3 SV=2  
Inosine-5'-monophosphate dehydrogenase 2 (Fragment) OS=Homo sapiens GN=IMPDH2 PE=3 SV=1  
Eukaryotic translation initiation factor 4B OS=Homo sapiens GN=EIF4B PE=4 SV=1  
V-type proton ATPase catalytic subunit A OS=Homo sapiens GN=ATP6V1A PE=2 SV=1  
RuvB-like 1 OS=Homo sapiens GN=RUVBL1 PE=4 SV=1  
Keratin, type II cytoskeletal 5 (Fragment) OS=Homo sapiens GN=KRT5 PE=4 SV=1  
Heterogeneous nuclear ribonucleoprotein D0 (Fragment) OS=Homo sapiens GN=HNRNPD PE=4 SV=1  
Dynamin-1-like protein OS=Homo sapiens GN=DNM1L PE=3 SV=1  
Lamin-B1 OS=Homo sapiens GN=LMNB1 PE=3 SV=1  
40S ribosomal protein SA (Fragment) OS=Homo sapiens GN=RPSA PE=3 SV=1  
Glutathione S-transferase Mu 1 OS=Homo sapiens GN=GSTM1 PE=3 SV=1  
Serine/threonine-protein phosphatase OS=Homo sapiens GN=PPP1CA PE=3 SV=1  
Protein disulfide isomerase family A, member 3, isoform CRA\_b OS=Homo sapiens GN=PDIA3 PE=3 SV=1  
SH3 domain-containing kinase-binding protein 1 OS=Homo sapiens GN=SH3KBP1 PE=2 SV=1  
Actin-related protein 2/3 complex subunit 3 (Fragment) OS=Homo sapiens GN=ARPC3 PE=4 SV=1  
26S proteasome non-ATPase regulatory subunit 6 OS=Homo sapiens GN=PSMD6 PE=4 SV=1  
Heat shock protein HSP 90-beta (Fragment) OS=Homo sapiens GN=HSP90AB1 PE=4 SV=1  
Alpha-centractin OS=Homo sapiens GN=ACTR1A PE=3 SV=1  
Mucin-5B OS=Homo sapiens GN=MUC5B PE=4 SV=1  
DOCK10.2 OS=Homo sapiens GN=DOCK10.2 PE=2 SV=2  
CAP-Gly domain-containing linker protein 1 OS=Homo sapiens GN=CLIP1 PE=4 SV=1  
14-3-3 protein theta (Fragment) OS=Homo sapiens GN=YWHAQ PE=4 SV=1  
SH3 domain-binding protein 1 OS=Homo sapiens GN=SH3BP1 PE=4 SV=1

|                                 |         |    |   |    |   |
|---------------------------------|---------|----|---|----|---|
| tr E9PCW9 E9PCW9_HUMAN          | 36 kDa  | 0  | 0 | 7  | 7 |
| tr B4DTC3 B4DTC3_HUMAN (+3)     | 34 kDa  | 4  | 0 | 5  | 0 |
| tr H0Y5W0 H0Y5W0_HUMAN (+6)     | 374 kDa | 2  | 0 | 2  | 0 |
| tr E7EU23 E7EU23_HUMAN          | 51 kDa  | 9  | 0 | 6  | 3 |
| REVtr BOUYX3 BOUYX3_HUMAN (+12) | 456 kDa | 2  | 0 | 0  | 0 |
| REVtr E9PH58 E9PH58_HUMAN (+1)  | 109 kDa | 2  | 0 | 0  | 0 |
| tr F8VZN8 F8VZN8_HUMAN (+3)     | 77 kDa  | 0  | 6 | 2  | 8 |
| tr E7EW34 E7EW34_HUMAN (+1)     | 86 kDa  | 11 | 0 | 7  | 0 |
| tr G3V1U9 G3V1U9_HUMAN (+5)     | 46 kDa  | 6  | 0 | 7  | 0 |
| tr H0YE35 H0YE35_HUMAN (+2)     | 16 kDa  | 0  | 0 | 3  | 5 |
| tr C9JTV5 C9JTV5_HUMAN (+2)     | 10 kDa  | 8  | 0 | 6  | 2 |
| tr E9PF63 E9PF63_HUMAN          | 133 kDa | 10 | 0 | 14 | 0 |
| tr B5MCW9 B5MCW9_HUMAN (+1)     | 102 kDa | 3  | 0 | 7  | 0 |
| tr B9ZVX0 B9ZVX0_HUMAN (+6)     | 139 kDa | 7  | 0 | 4  | 0 |
| tr E9PM69 E9PM69_HUMAN (+6)     | 44 kDa  | 9  | 0 | 5  | 3 |
| tr E7EQB2 E7EQB2_HUMAN (+1)     | 77 kDa  | 11 | 0 | 3  | 3 |
| tr F5H1R4 F5H1R4_HUMAN (+8)     | 112 kDa | 6  | 0 | 11 | 0 |
| tr B3KUB2 B3KUB2_HUMAN (+1)     | 66 kDa  | 0  | 0 | 8  | 0 |
| REVtr C9JCU0 C9JCU0_HUMAN (+3)  | 26 kDa  | 0  | 0 | 2  | 0 |
| tr F8W6V6 F8W6V6_HUMAN (+4)     | 74 kDa  | 0  | 5 | 3  | 5 |
| tr B3KSY4 B3KSY4_HUMAN (+1)     | 77 kDa  | 4  | 0 | 5  | 0 |
| tr A8K3Z3 A8K3Z3_HUMAN          | 45 kDa  | 8  | 0 | 3  | 3 |
| tr A6PW80 A6PW80_HUMAN          | 12 kDa  | 0  | 2 | 4  | 3 |
| tr B4DG50 B4DG50_HUMAN (+2)     | 20 kDa  | 4  | 0 | 3  | 0 |
| tr A8MY36 A8MY36_HUMAN (+4)     | 141 kDa | 4  | 0 | 12 | 0 |
| tr F5H737 F5H737_HUMAN          | 45 kDa  | 10 | 0 | 4  | 0 |
| tr A8CZ64 A8CZ64_HUMAN (+5)     | 36 kDa  | 6  | 0 | 4  | 2 |
| REVtr F8WCL5 F8WCL5_HUMAN (+2)  | 987 kDa | 0  | 2 | 0  | 0 |
| tr A6NIW2 A6NIW2_HUMAN (+3)     | 238 kDa | 3  | 0 | 4  | 0 |
| tr E7ERW7 E7ERW7_HUMAN (+1)     | 153 kDa | 0  | 0 | 6  | 4 |
| tr B7ZL00 B7ZL00_HUMAN (+4)     | 128 kDa | 11 | 0 | 6  | 0 |
| tr E7EQR6 E7EQR6_HUMAN (+3)     | 44 kDa  | 9  | 0 | 0  | 2 |
| tr G3V0F9 G3V0F9_HUMAN          | 97 kDa  | 0  | 0 | 13 | 0 |
| tr E9PCY7 E9PCY7_HUMAN (+6)     | 47 kDa  | 4  | 0 | 10 | 2 |
| tr G3V5X4 G3V5X4_HUMAN (+1)     | 788 kDa | 0  | 0 | 2  | 0 |
| tr C9J2Y9 C9J2Y9_HUMAN (+1)     | 133 kDa | 2  | 0 | 3  | 0 |
| tr H0Y4R1 H0Y4R1_HUMAN          | 51 kDa  | 9  | 0 | 0  | 0 |
| tr E7EX17 E7EX17_HUMAN (+7)     | 70 kDa  | 3  | 0 | 3  | 2 |
| tr B7Z1R5 B7Z1R5_HUMAN          | 65 kDa  | 9  | 0 | 6  | 0 |
| tr E7ETR0 E7ETR0_HUMAN          | 35 kDa  | 6  | 0 | 7  | 6 |
| tr H0YIN9 H0YIN9_HUMAN (+1)     | 22 kDa  | 0  | 6 | 0  | 0 |
| tr D6RAF8 D6RAF8_HUMAN (+7)     | 23 kDa  | 4  | 0 | 2  | 0 |
| tr G8JLD5 G8JLD5_HUMAN (+2)     | 80 kDa  | 2  | 0 | 0  | 0 |
| tr E9PBF6 E9PBF6_HUMAN (+2)     | 45 kDa  | 0  | 0 | 7  | 6 |
| tr C9J9K3 C9J9K3_HUMAN (+5)     | 30 kDa  | 3  | 0 | 5  | 2 |
| tr E7EWW9 E7EWW9_HUMAN          | 28 kDa  | 5  | 0 | 0  | 0 |
| tr A6NNR3 A6NNR3_HUMAN (+5)     | 33 kDa  | 5  | 0 | 3  | 3 |
| tr G5EA52 G5EA52_HUMAN          | 55 kDa  | 8  | 2 | 0  | 0 |
| tr B7Z6E8 B7Z6E8_HUMAN          | 44 kDa  | 5  | 0 | 6  | 0 |
| tr C9JZD1 C9JZD1_HUMAN (+1)     | 12 kDa  | 5  | 0 | 3  | 2 |
| tr C9IZE4 C9IZE4_HUMAN (+3)     | 52 kDa  | 8  | 0 | 4  | 0 |
| tr H0Y6E4 H0Y6E4_HUMAN          | 17 kDa  | 5  | 0 | 5  | 0 |
| tr F5H3I4 F5H3I4_HUMAN (+1)     | 35 kDa  | 2  | 0 | 3  | 0 |
| tr E9PBJ0 E9PBJ0_HUMAN          | 597 kDa | 4  | 0 | 0  | 0 |
| tr B3FL70 B3FL70_HUMAN (+2)     | 249 kDa | 3  | 0 | 3  | 0 |
| tr F5H0N7 F5H0N7_HUMAN (+1)     | 116 kDa | 3  | 0 | 5  | 0 |
| tr E9PG15 E9PG15_HUMAN (+1)     | 17 kDa  | 2  | 0 | 5  | 5 |
| tr F5GZA8 F5GZA8_HUMAN          | 55 kDa  | 3  | 0 | 6  | 0 |

AP-1 complex subunit gamma-1 OS=Homo sapiens GN=AP1G1 PE=2 SV=1  
 MLL cleavage product C180 OS=Homo sapiens GN=MLL PE=4 SV=1  
 Eukaryotic translation initiation factor 4 gamma 3 OS=Homo sapiens GN=EIF4G3 PE=4 SV=1  
 General vesicular transport factor p115 OS=Homo sapiens GN=USO1 PE=4 SV=1  
 Elongation factor 1-delta OS=Homo sapiens GN=EEF1D PE=3 SV=1  
 Calcium/calmodulin-dependent protein kinase type II subunit delta OS=Homo sapiens GN=CAMK2D PE=4 SV=1  
 ALOX5 protein OS=Homo sapiens GN=ALOX5 PE=2 SV=1  
 HCF N-terminal chain 5 OS=Homo sapiens GN=HCFC1 PE=4 SV=2  
 Calponin-2 OS=Homo sapiens GN=CNN2 PE=2 SV=1  
 Annexin OS=Homo sapiens GN=ANXA4 PE=2 SV=1  
 AP-1 complex subunit beta-1 (Fragment) OS=Homo sapiens GN=AP1B1 PE=4 SV=1  
 HCG2002594, isoform CRA\_c OS=Homo sapiens GN=SEPT5 PE=3 SV=1  
 Mitotic checkpoint protein BUB3 OS=Homo sapiens GN=BUB3 PE=2 SV=1  
 Keratin-associated protein 2-1 OS=Homo sapiens GN=KRTAP2-1 PE=4 SV=1  
 Ena/VASP-like protein OS=Homo sapiens GN=EVL PE=2 SV=1  
 Alstrom syndrome protein 1 OS=Homo sapiens GN=ALMS1 PE=4 SV=1  
 C-1-tetrahydrofolate synthase, cytoplasmic OS=Homo sapiens GN=MTHFD1 PE=3 SV=1  
 Phosphoribosyl pyrophosphate synthetase 1 OS=Homo sapiens GN=PRPS1 PE=3 SV=1  
 AP-1 complex subunit mu-1 OS=Homo sapiens GN=AP1M1 PE=4 SV=1  
 Guanine nucleotide exchange factor DBS (Fragment) OS=Homo sapiens GN=MCF2L PE=4 SV=1  
 Nascent polypeptide-associated complex subunit alpha OS=Homo sapiens GN=NACA PE=4 SV=1  
 Probable ATP-dependent RNA helicase DHX36 OS=Homo sapiens GN=DHX36 PE=4 SV=1  
 Acidic leucine-rich nuclear phosphoprotein 32 family member E (Fragment) OS=Homo sapiens GN=ANP32E PE=4 SV=1  
 Transaldolase OS=Homo sapiens GN=TALDO1 PE=3 SV=1  
 Synaptic vesicle membrane protein VAT-1 homolog OS=Homo sapiens GN=VAT1 PE=2 SV=1  
 Ras GTPase-activating-like protein IQGAP1 (Fragment) OS=Homo sapiens GN=IQGAP1 PE=4 SV=1  
 Kinectin OS=Homo sapiens GN=KTN1 PE=4 SV=1  
 Nebulin OS=Homo sapiens GN=NEB PE=4 SV=1  
 Poly(rC)-binding protein 2 OS=Homo sapiens GN=PCBP2 PE=2 SV=1  
 Heterogeneous nuclear ribonucleoprotein A3 OS=Homo sapiens GN=HNRNPA3 PE=4 SV=1  
 Dynactin subunit 2 OS=Homo sapiens GN=DCTN2 PE=4 SV=1  
 Annexin OS=Homo sapiens GN=ANXA6 PE=3 SV=1  
 Heat shock protein beta-1 OS=Homo sapiens GN=HSPB1 PE=4 SV=1  
 Glucose-6-phosphate 1-dehydrogenase (Fragment) OS=Homo sapiens GN=G6PD PE=3 SV=1  
 Coiled-coil domain-containing protein 88B OS=Homo sapiens GN=CCDC88B PE=1 SV=1  
 Heterogeneous nuclear ribonucleoprotein A/B OS=Homo sapiens GN=HNRNPAB PE=4 SV=1  
 Tyrosine-protein kinase Fes/Fps OS=Homo sapiens GN=FES PE=3 SV=1  
 Ribonucleoprotein PTB-binding 1 OS=Homo sapiens GN=RAVER1 PE=4 SV=1  
 Uncharacterized protein OS=Homo sapiens PE=4 SV=1  
 26S protease regulatory subunit 10B (Fragment) OS=Homo sapiens GN=PSMC6 PE=4 SV=1  
 T-complex protein 1 subunit epsilon OS=Homo sapiens GN=CCT5 PE=4 SV=1  
 Serine/threonine-protein phosphatase 2A 65 kDa regulatory subunit A alpha isoform OS=Homo sapiens GN=PPP2R1A PE=4 SV=1  
 Septin-11 OS=Homo sapiens GN=SEPT11 PE=3 SV=1  
 Ras-related C3 botulinum toxin substrate 2 OS=Homo sapiens GN=RAC2 PE=3 SV=1  
 Twinfilin-2 OS=Homo sapiens GN=TWF2 PE=4 SV=1  
 Archain 1, isoform CRA\_a OS=Homo sapiens GN=ARCN1 PE=4 SV=1  
 ATP-binding cassette sub-family E member 1 OS=Homo sapiens GN=ABCE1 PE=4 SV=1  
 Golgin subfamily B member 1 OS=Homo sapiens GN=GOLGB1 PE=4 SV=1  
 Remodeling and spacing factor 1 (Fragment) OS=Homo sapiens GN=RSF1 PE=4 SV=1  
 Nuclear pore complex protein Nup153 OS=Homo sapiens GN=NUP153 PE=4 SV=1  
 AP-3 complex subunit beta-1 OS=Homo sapiens GN=AP3B1 PE=4 SV=1  
 V-type proton ATPase subunit B, brain isoform (Fragment) OS=Homo sapiens GN=ATP6V1B2 PE=4 SV=1  
 COP9 signalosome complex subunit 4 OS=Homo sapiens GN=COPS4 PE=4 SV=1  
 Ubiquitin carboxyl-terminal hydrolase OS=Homo sapiens GN=USP7 PE=2 SV=1  
 Leukotriene A-4 hydrolase OS=Homo sapiens GN=LTA4H PE=4 SV=1  
 Coatmer subunit beta (Fragment) OS=Homo sapiens GN=COPB1 PE=4 SV=1  
 Beta-parvin OS=Homo sapiens GN=PARVB PE=4 SV=1  
 LIM and senescent cell antigen-like-containing domain protein 2 OS=Homo sapiens GN=LIMS2 PE=4 SV=1

|                                |         |    |   |    |   |
|--------------------------------|---------|----|---|----|---|
| tr B3KXW5 B3KXW5_HUMAN (+4)    | 94 kDa  | 7  | 0 | 9  | 0 |
| REVtr E9PQG7 E9PQG7_HUMAN (+2) | 432 kDa | 0  | 3 | 0  | 0 |
| tr F5H564 F5H564_HUMAN (+1)    | 134 kDa | 2  | 0 | 5  | 0 |
| tr F5GYR8 F5GYR8_HUMAN (+3)    | 109 kDa | 7  | 0 | 2  | 0 |
| tr E9PRY8 E9PRY8_HUMAN (+22)   | 77 kDa  | 3  | 0 | 3  | 0 |
| tr E9PBG7 E9PBG7_HUMAN (+22)   | 58 kDa  | 6  | 0 | 10 | 0 |
| tr B7ZLS0 B7ZLS0_HUMAN         | 72 kDa  | 3  | 0 | 2  | 2 |
| tr A6NEM2 A6NEM2_HUMAN (+3)    | 213 kDa | 3  | 0 | 6  | 0 |
| tr B4DDF4 B4DDF4_HUMAN (+2)    | 33 kDa  | 4  | 0 | 5  | 2 |
| tr B4DDF9 B4DDF9_HUMAN         | 27 kDa  | 4  | 3 | 5  | 3 |
| tr C9J1E7 C9J1E7_HUMAN         | 65 kDa  | 5  | 0 | 6  | 0 |
| tr G3XAH0 G3XAH0_HUMAN (+4)    | 44 kDa  | 4  | 0 | 6  | 0 |
| tr B4DDM6 B4DDM6_HUMAN         | 28 kDa  | 6  | 0 | 5  | 0 |
| tr F5H1T9 F5H1T9_HUMAN (+1)    | 13 kDa  | 3  | 6 | 0  | 0 |
| tr B7Z3I5 B7Z3I5_HUMAN         | 42 kDa  | 4  | 0 | 5  | 0 |
| REVtr B8ZZJ3 B8ZZJ3_HUMAN (+1) | 456 kDa | 0  | 2 | 0  | 0 |
| tr F5H2F4 F5H2F4_HUMAN (+2)    | 111 kDa | 5  | 0 | 4  | 0 |
| tr B1ALA9 B1ALA9_HUMAN (+1)    | 24 kDa  | 2  | 0 | 3  | 0 |
| tr E7ENJ6 E7ENJ6_HUMAN         | 43 kDa  | 5  | 0 | 4  | 0 |
| tr H0Y4M6 H0Y4M6_HUMAN (+1)    | 36 kDa  | 0  | 2 | 0  | 0 |
| tr E9PAV3 E9PAV3_HUMAN (+5)    | 205 kDa | 4  | 0 | 0  | 0 |
| tr F5GZS0 F5GZS0_HUMAN (+1)    | 113 kDa | 0  | 0 | 4  | 0 |
| tr E9PPH5 E9PPH5_HUMAN (+4)    | 13 kDa  | 3  | 0 | 0  | 0 |
| tr F2Z393 F2Z393_HUMAN (+1)    | 35 kDa  | 3  | 0 | 2  | 0 |
| tr B4DPX4 B4DPX4_HUMAN (+1)    | 35 kDa  | 5  | 0 | 3  | 2 |
| tr H0YKA5 H0YKA5_HUMAN         | 5 kDa   | 2  | 0 | 4  | 0 |
| REVtr G3V4Y7 G3V4Y7_HUMAN (+4) | 69 kDa  | 0  | 0 | 2  | 0 |
| tr F8WCL5 F8WCL5_HUMAN (+2)    | 987 kDa | 0  | 2 | 0  | 0 |
| tr B4DLC0 B4DLC0_HUMAN (+12)   | 32 kDa  | 4  | 0 | 6  | 0 |
| tr E7EWI9 E7EWI9_HUMAN         | 34 kDa  | 2  | 0 | 8  | 3 |
| tr F5H223 F5H223_HUMAN (+1)    | 42 kDa  | 7  | 0 | 5  | 0 |
| tr E9PGK1 E9PGK1_HUMAN (+11)   | 72 kDa  | 0  | 3 | 2  | 2 |
| tr F8WE04 F8WE04_HUMAN         | 20 kDa  | 2  | 0 | 0  | 0 |
| tr E7EM57 E7EM57_HUMAN (+2)    | 37 kDa  | 5  | 0 | 0  | 0 |
| sp A6NC98 CC88B_HUMAN (+5)     | 165 kDa | 7  | 0 | 2  | 0 |
| tr D6RD18 D6RD18_HUMAN (+2)    | 30 kDa  | 3  | 0 | 3  | 3 |
| tr E7ENM8 E7ENM8_HUMAN         | 77 kDa  | 4  | 0 | 3  | 0 |
| tr E9PAU2 E9PAU2_HUMAN         | 80 kDa  | 0  | 0 | 3  | 2 |
| tr F8W810 F8W810_HUMAN         | 51 kDa  | 3  | 0 | 3  | 0 |
| tr H0YJCO H0YJCO_HUMAN         | 30 kDa  | 3  | 0 | 2  | 3 |
| tr E7ENZ3 E7ENZ3_HUMAN (+3)    | 54 kDa  | 6  | 0 | 0  | 0 |
| tr F5H3X9 F5H3X9_HUMAN (+1)    | 59 kDa  | 10 | 0 | 0  | 0 |
| tr D6RER5 D6RER5_HUMAN (+11)   | 50 kDa  | 6  | 0 | 4  | 0 |
| tr B1AH77 B1AH77_HUMAN (+2)    | 17 kDa  | 7  | 0 | 0  | 3 |
| tr D6RG15 D6RG15_HUMAN         | 29 kDa  | 6  | 0 | 4  | 0 |
| tr B0YIW6 B0YIW6_HUMAN (+2)    | 62 kDa  | 8  | 3 | 0  | 0 |
| tr D6R9I9 D6R9I9_HUMAN (+2)    | 47 kDa  | 12 | 0 | 0  | 0 |
| REVtr E7EP74 E7EP74_HUMAN (+4) | 377 kDa | 0  | 2 | 0  | 0 |
| REVtr H0YCN2 H0YCN2_HUMAN (+1) | 91 kDa  | 0  | 2 | 0  | 0 |
| tr F6QR24 F6QR24_HUMAN         | 157 kDa | 0  | 0 | 3  | 0 |
| tr E5RJ68 E5RJ68_HUMAN         | 116 kDa | 5  | 0 | 0  | 0 |
| tr H0YCO4 H0YCO4_HUMAN         | 21 kDa  | 5  | 0 | 0  | 0 |
| tr D6RAX7 D6RAX7_HUMAN (+4)    | 48 kDa  | 5  | 0 | 4  | 0 |
| tr B7Z815 B7Z815_HUMAN (+5)    | 126 kDa | 5  | 0 | 6  | 0 |
| tr F8VV40 F8VV40_HUMAN         | 67 kDa  | 4  | 5 | 0  | 0 |
| tr E9PP73 E9PP73_HUMAN         | 56 kDa  | 4  | 0 | 3  | 0 |
| tr B0QYM8 B0QYM8_HUMAN         | 38 kDa  | 6  | 0 | 5  | 0 |
| tr F5H6E6 F5H6E6_HUMAN (+1)    | 41 kDa  | 0  | 0 | 2  | 0 |

|                                                                                                                         |                                 |         |   |   |   |   |
|-------------------------------------------------------------------------------------------------------------------------|---------------------------------|---------|---|---|---|---|
| Macrophage-capping protein OS=Homo sapiens GN=CAPG PE=2 SV=1                                                            | tr B4DU58 B4DU58_HUMAN (+2)     | 36 kDa  | 5 | 0 | 2 | 0 |
| Protein SEC13 homolog OS=Homo sapiens GN=SEC13 PE=4 SV=1                                                                | tr A8MV37 A8MV37_HUMAN (+3)     | 34 kDa  | 0 | 0 | 3 | 0 |
| Lipopolysaccharide-responsive and beige-like anchor protein OS=Homo sapiens GN=LRBA PE=4 SV=1                           | tr E9PEM5 E9PEM5_HUMAN (+4)     | 287 kDa | 4 | 0 | 0 | 0 |
| Septin-2 OS=Homo sapiens GN=SEPT2 PE=3 SV=1                                                                             | tr B5MCX3 B5MCX3_HUMAN (+1)     | 37 kDa  | 5 | 0 | 4 | 0 |
| Actin-related protein 2/3 complex subunit 5 OS=Homo sapiens GN=ARPC5 PE=3 SV=1                                          | tr B1ALCO B1ALCO_HUMAN          | 15 kDa  | 4 | 0 | 0 | 0 |
| Zyxin (Fragment) OS=Homo sapiens GN=ZYX PE=4 SV=1                                                                       | tr H0Y2Y8 H0Y2Y8_HUMAN (+1)     | 58 kDa  | 2 | 0 | 2 | 0 |
| Serine/threonine-protein kinase WNK1 OS=Homo sapiens GN=WNK1 PE=4 SV=1                                                  | tr F5H2M7 F5H2M7_HUMAN (+3)     | 305 kDa | 4 | 0 | 0 | 0 |
| Albumin, isoform CRA_k OS=Homo sapiens GN=ALB PE=4 SV=1                                                                 | tr C9JKR2 C9JKR2_HUMAN (+3)     | 47 kDa  | 3 | 0 | 2 | 0 |
| Arf-GAP with Rho-GAP domain, ANK repeat and PH domain-containing protein 1 OS=Homo sapiens GN=ARAP1 PE=4 SV=1           | tr E7EU13 E7EU13_HUMAN (+3)     | 135 kDa | 2 | 0 | 0 | 0 |
| Eukaryotic translation initiation factor 2 subunit 1 (Fragment) OS=Homo sapiens GN=EIF2F1 PE=4 SV=1                     | tr G3V4T5 G3V4T5_HUMAN (+1)     | 31 kDa  | 2 | 0 | 5 | 0 |
| Stress-induced-phosphoprotein 1 OS=Homo sapiens GN=STIP1 PE=4 SV=1                                                      | tr G3XAD8 G3XAD8_HUMAN (+9)     | 68 kDa  | 7 | 0 | 0 | 0 |
| Threonine--tRNA ligase, cytoplasmic OS=Homo sapiens GN=TARS PE=3 SV=1                                                   | tr E7ER13 E7ER13_HUMAN (+1)     | 70 kDa  | 5 | 0 | 2 | 0 |
| Protein arginine N-methyltransferase 1 OS=Homo sapiens GN=PRMT1 PE=4 SV=1                                               | tr E9PKG1 E9PKG1_HUMAN (+1)     | 38 kDa  | 6 | 0 | 4 | 0 |
| Drebrin-like protein OS=Homo sapiens GN=DBNL PE=2 SV=1                                                                  | tr B4DDD6 B4DDD6_HUMAN (+12)    | 46 kDa  | 2 | 0 | 0 | 0 |
| Rho guanine nucleotide exchange factor 6 OS=Homo sapiens GN=ARHGEF6 PE=2 SV=1                                           | tr B7Z3C7 B7Z3C7_HUMAN (+3)     | 73 kDa  | 4 | 0 | 3 | 0 |
| Zinc finger protein 521 OS=Homo sapiens GN=ZNF521 PE=4 SV=2                                                             | tr H7BYU6 H7BYU6_HUMAN (+2)     | 140 kDa | 0 | 0 | 2 | 0 |
| Striatin-4 OS=Homo sapiens GN=STRN4 PE=4 SV=1                                                                           | tr F8VYA6 F8VYA6_HUMAN (+8)     | 81 kDa  | 0 | 0 | 6 | 0 |
| Protein SET OS=Homo sapiens GN=SET PE=3 SV=1                                                                            | tr B2REB8 B2REB8_HUMAN          | 31 kDa  | 4 | 0 | 0 | 2 |
| Microtubule-associated protein OS=Homo sapiens GN=MAP4 PE=4 SV=1                                                        | tr E7EVA0 E7EVA0_HUMAN (+6)     | 245 kDa | 2 | 0 | 0 | 0 |
| Structural maintenance of chromosomes protein 1A OS=Homo sapiens GN=SMC1A PE=4 SV=1                                     | tr G8JL61 G8JL61_HUMAN (+3)     | 59 kDa  | 0 | 0 | 4 | 3 |
| Keratin, type I cytoskeletal 40 OS=Homo sapiens GN=KRT40 PE=4 SV=1                                                      | tr G3V1C2 G3V1C2_HUMAN          | 26 kDa  | 0 | 4 | 0 | 0 |
| 60S acidic ribosomal protein P0 (Fragment) OS=Homo sapiens GN=RPLP0 PE=3 SV=1                                           | tr F8VU65 F8VU65_HUMAN (+9)     | 27 kDa  | 2 | 0 | 3 | 2 |
| 26S protease regulatory subunit 7 OS=Homo sapiens GN=PSMC2 PE=2 SV=1                                                    | tr B7Z5E2 B7Z5E2_HUMAN          | 33 kDa  | 6 | 0 | 3 | 0 |
| Vacuolar protein sorting-associated protein 26A OS=Homo sapiens GN=VPS26A PE=4 SV=1                                     | tr F5H4L7 F5H4L7_HUMAN          | 37 kDa  | 3 | 0 | 4 | 0 |
| Tubulin beta chain OS=Homo sapiens GN=TUBB PE=3 SV=1                                                                    | tr F8VUJ7 F8VUJ7_HUMAN (+3)     | 47 kDa  | 0 | 0 | 2 | 2 |
| Protein-tyrosine kinase 2-beta OS=Homo sapiens GN=PTK2B PE=4 SV=1                                                       | tr E9PB14 E9PB14_HUMAN (+4)     | 68 kDa  | 2 | 0 | 0 | 0 |
| EF-hand domain-containing protein 1 OS=Homo sapiens GN=EFHC1 PE=4 SV=1                                                  | REVtr F5GZD8 F5GZD8_HUMAN       | 72 kDa  | 0 | 0 | 0 | 2 |
| SKI family transcriptional corepressor 1 OS=Homo sapiens GN=SKOR1 PE=4 SV=1                                             | REVtr G3V3E1 G3V3E1_HUMAN (+2)  | 96 kDa  | 0 | 2 | 0 | 0 |
| Dnal1 homolog subfamily A member 2 (Fragment) OS=Homo sapiens GN=DNAA2 PE=4 SV=1                                        | tr H3B8M5 H3B8M5_HUMAN          | 15 kDa  | 2 | 0 | 2 | 3 |
| Eukaryotic translation initiation factor 3 subunit F OS=Homo sapiens GN=EIF3F PE=2 SV=1                                 | tr B3KSH1 B3KSH1_HUMAN (+3)     | 39 kDa  | 2 | 3 | 0 | 2 |
| Heat shock 70 kDa protein 1-like OS=Homo sapiens GN=HSPA1L PE=2 SV=1                                                    | tr B4DXY3 B4DXY3_HUMAN (+7)     | 58 kDa  | 0 | 2 | 0 | 0 |
| Peptidyl-prolyl cis-trans isomerase FKBP5 OS=Homo sapiens GN=FKBP5 PE=2 SV=1                                            | tr B7Z7Z8 B7Z7Z8_HUMAN          | 32 kDa  | 4 | 0 | 0 | 0 |
| Histone H2B OS=Homo sapiens GN=HIST2H2BF PE=2 SV=1                                                                      | tr B4DR52 B4DR52_HUMAN          | 18 kDa  | 0 | 4 | 0 | 0 |
| ADP-ribosylation factor 3 OS=Homo sapiens GN=ARF3 PE=2 SV=1                                                             | tr B7ZB63 B7ZB63_HUMAN (+2)     | 16 kDa  | 3 | 2 | 5 | 2 |
| Bridging integrator 2 OS=Homo sapiens GN=BIN2 PE=4 SV=1                                                                 | tr F5HOW4 F5HOW4_HUMAN (+1)     | 59 kDa  | 4 | 0 | 2 | 0 |
| 26S protease regulatory subunit 7 (Fragment) OS=Homo sapiens GN=PSMC2 PE=4 SV=1                                         | tr C9JLS9 C9JLS9_HUMAN          | 15 kDa  | 5 | 0 | 3 | 0 |
| Protein disulfide-isomerase A6 OS=Homo sapiens GN=PDI6 PE=3 SV=1                                                        | tr B5MCQ5 B5MCQ5_HUMAN (+2)     | 53 kDa  | 5 | 0 | 2 | 0 |
| T-complex protein 1 subunit delta OS=Homo sapiens GN=CCT4 PE=3 SV=1                                                     | tr F5H5W3 F5H5W3_HUMAN          | 55 kDa  | 3 | 0 | 0 | 0 |
| Ras-related protein Rap-1b (Fragment) OS=Homo sapiens GN=RAP1B PE=4 SV=1                                                | tr E7ESV4 E7ESV4_HUMAN (+4)     | 18 kDa  | 5 | 0 | 3 | 3 |
| Phosphatidylinositol 5-phosphate 4-kinase type-2 alpha OS=Homo sapiens GN=PIP4K2A PE=2 SV=1                             | tr B4DGX2 B4DGX2_HUMAN          | 40 kDa  | 5 | 0 | 2 | 0 |
| Lysozyme C OS=Homo sapiens GN=LYZ PE=3 SV=1                                                                             | tr F8VV32 F8VV32_HUMAN          | 11 kDa  | 4 | 0 | 0 | 0 |
| Cell division control protein 42 homolog OS=Homo sapiens GN=CDC42 PE=3 SV=1                                             | tr E7ETU3 E7ETU3_HUMAN          | 27 kDa  | 3 | 0 | 3 | 0 |
| Protein disulfide-isomerase OS=Homo sapiens GN=P4HB PE=3 SV=1                                                           | tr F5H8J2 F5H8J2_HUMAN (+1)     | 51 kDa  | 9 | 0 | 0 | 0 |
| Phosphodiesterase 5A, cGMP-specific, isoform CRA_a OS=Homo sapiens GN=PDE5A PE=4 SV=1                                   | tr G5E9C5 G5E9C5_HUMAN          | 94 kDa  | 9 | 0 | 0 | 0 |
| Guanine nucleotide-binding protein G(i)/G(s)/G(t) subunit beta-2 OS=Homo sapiens GN=GNB2 PE=4 SV=1                      | tr E7EP32 E7EP32_HUMAN          | 32 kDa  | 0 | 0 | 2 | 5 |
| Protein PRRC2A OS=Homo sapiens GN=PRRC2A PE=4 SV=1                                                                      | REVtr F8VVM9 F8VVM9_HUMAN (+10) | 146 kDa | 2 | 0 | 0 | 0 |
| Dihydropyrimidinase-related protein 1 OS=Homo sapiens GN=CRMP1 PE=4 SV=1                                                | tr E9PD68 E9PD68_HUMAN          | 62 kDa  | 4 | 0 | 0 | 0 |
| Heat shock protein 75 kDa, mitochondrial OS=Homo sapiens GN=TRAP1 PE=3 SV=1                                             | tr F5H897 F5H897_HUMAN (+3)     | 74 kDa  | 2 | 0 | 0 | 2 |
| CAD protein OS=Homo sapiens GN=CAD PE=3 SV=1                                                                            | tr F8VPD4 F8VPD4_HUMAN          | 236 kDa | 3 | 0 | 0 | 0 |
| DENN domain-containing protein 4C OS=Homo sapiens GN=DENND4C PE=2 SV=1                                                  | tr B7Z660 B7Z660_HUMAN          | 110 kDa | 0 | 0 | 2 | 0 |
| Annexin OS=Homo sapiens GN=ANXA11 PE=2 SV=1                                                                             | tr B4DVE7 B4DVE7_HUMAN (+1)     | 51 kDa  | 3 | 0 | 0 | 0 |
| GRIP1-associated protein 1 OS=Homo sapiens GN=GRIPAP1 PE=4 SV=1                                                         | tr B1B0M1 B1B0M1_HUMAN          | 91 kDa  | 2 | 0 | 3 | 0 |
| Proteasome subunit alpha type-1 OS=Homo sapiens GN=PSMA1 PE=4 SV=1                                                      | tr F5GX11 F5GX11_HUMAN          | 27 kDa  | 3 | 0 | 3 | 0 |
| Isoform 2 of Structural maintenance of chromosomes flexible hinge domain-containing protein 1 OS=Homo sapiens GN=SMCHD1 | sp A6NHR9-2 SMHD1_HUMAN (+1)    | 216 kDa | 2 | 0 | 4 | 0 |
| Kinesin-like protein KIF2A OS=Homo sapiens GN=KIF2A PE=3 SV=1                                                           | tr E9PB70 E9PB70_HUMAN          | 78 kDa  | 2 | 0 | 4 | 2 |
| Vacuolar protein sorting-associated protein 26B OS=Homo sapiens GN=VPS26B PE=4 SV=1                                     | tr E9PRT4 E9PRT4_HUMAN          | 38 kDa  | 3 | 0 | 3 | 0 |
| Cytohesin-1 OS=Homo sapiens GN=CYTH1 PE=2 SV=1                                                                          | tr B7Z1T4 B7Z1T4_HUMAN (+1)     | 39 kDa  | 0 | 0 | 5 | 2 |
| cAMP-dependent protein kinase catalytic subunit beta OS=Homo sapiens GN=PRKACB PE=4 SV=2                                | tr C9JK39 C9JK39_HUMAN (+1)     | 41 kDa  | 3 | 0 | 2 | 0 |

|                                                                                                                       |                                |         |   |   |   |   |
|-----------------------------------------------------------------------------------------------------------------------|--------------------------------|---------|---|---|---|---|
| 5'-AMP-activated protein kinase subunit gamma-1 OS=Homo sapiens GN=PRKAG1 PE=2 SV=1                                   | tr B4DDT7 B4DDT7_HUMAN (+5)    | 34 kDa  | 5 | 0 | 3 | 0 |
| Cytosolic purine 5'-nucleotidase OS=Homo sapiens GN=NT5C2 PE=2 SV=1                                                   | tr B72382 B72382_HUMAN         | 61 kDa  | 6 | 0 | 0 | 0 |
| Serine/threonine-protein kinase MST4 OS=Homo sapiens GN=MST4 PE=2 SV=1                                                | tr B4E0Y9 B4E0Y9_HUMAN         | 49 kDa  | 4 | 0 | 2 | 0 |
| 26S proteasome non-ATPase regulatory subunit 3 OS=Homo sapiens GN=PSMD3 PE=2 SV=1                                     | tr B4DT72 B4DT72_HUMAN         | 41 kDa  | 8 | 0 | 0 | 0 |
| Polyadenylate-binding protein 1 OS=Homo sapiens GN=PABPC1 PE=4 SV=1                                                   | tr E7ERJ7 E7ERJ7_HUMAN (+3)    | 67 kDa  | 3 | 0 | 4 | 0 |
| Polyubiquitin-C (Fragment) OS=Homo sapiens GN=UBC PE=1 SV=1                                                           | tr F5H747 F5H747_HUMAN (+12)   | 18 kDa  | 2 | 0 | 2 | 0 |
| Nuclear export mediator factor NEMF (Fragment) OS=Homo sapiens GN=NEMF PE=4 SV=1                                      | tr G3V5V3 G3V5V3_HUMAN (+4)    | 114 kDa | 0 | 0 | 2 | 0 |
| Arf-GAP with GTPase, ANK repeat and PH domain-containing protein 2 OS=Homo sapiens GN=AGAP2 PE=4 SV=1                 | tr F8VVT9 F8VVT9_HUMAN         | 125 kDa | 2 | 0 | 0 | 0 |
| Kinesin heavy chain isoform 5C OS=Homo sapiens GN=KIF5C PE=3 SV=2                                                     | tr E9PET8 E9PET8_HUMAN         | 99 kDa  | 5 | 0 | 3 | 0 |
| Methionine--tRNA ligase, cytoplasmic OS=Homo sapiens GN=MARS PE=3 SV=3                                                | tr A6NC17 A6NC17_HUMAN (+14)   | 72 kDa  | 4 | 0 | 2 | 0 |
| Eukaryotic translation initiation factor 3 subunit H OS=Homo sapiens GN=EIF3S3 PE=2 SV=1                              | tr B3KS98 B3KS98_HUMAN (+5)    | 42 kDa  | 2 | 0 | 3 | 0 |
| Hexokinase-1 OS=Homo sapiens GN=HK1 PE=4 SV=1                                                                         | tr E7ENR4 E7ENR4_HUMAN (+3)    | 106 kDa | 0 | 0 | 2 | 0 |
| AMP deaminase 2 OS=Homo sapiens GN=AMPD2 PE=4 SV=1                                                                    | tr E9PNGO E9PNGO_HUMAN (+4)    | 88 kDa  | 4 | 0 | 0 | 0 |
| 1,4-alpha-glucan-branching enzyme OS=Homo sapiens GN=GBE1 PE=4 SV=1                                                   | tr E9PGM4 E9PGM4_HUMAN (+1)    | 76 kDa  | 2 | 0 | 0 | 0 |
| Ribosomal protein S6 kinase OS=Homo sapiens GN=RP56KA1 PE=3 SV=1                                                      | tr E9PGT3 E9PGT3_HUMAN (+1)    | 81 kDa  | 2 | 0 | 4 | 0 |
| 40S ribosomal protein S3 OS=Homo sapiens GN=RPS3 PE=3 SV=1                                                            | tr E9PLO9 E9PLO9_HUMAN (+11)   | 25 kDa  | 4 | 0 | 0 | 0 |
| Importin subunit beta-1 OS=Homo sapiens GN=KPNB1 PE=2 SV=1                                                            | tr B7ZAV6 B7ZAV6_HUMAN (+1)    | 81 kDa  | 6 | 0 | 0 | 0 |
| T-complex protein 1 subunit alpha OS=Homo sapiens GN=TCP1 PE=3 SV=1                                                   | tr E7ERF2 E7ERF2_HUMAN (+1)    | 47 kDa  | 4 | 0 | 0 | 0 |
| HEAT repeat-containing protein 5A OS=Homo sapiens GN=HEATR5A PE=4 SV=3                                                | tr B5MC49 B5MC49_HUMAN (+3)    | 123 kDa | 2 | 2 | 0 | 0 |
| Tropomodulin-3 (Fragment) OS=Homo sapiens GN=TMOD3 PE=4 SV=1                                                          | tr H0YKU1 H0YKU1_HUMAN (+1)    | 21 kDa  | 5 | 0 | 3 | 0 |
| Transitional endoplasmic reticulum ATPase (Fragment) OS=Homo sapiens GN=VCP PE=4 SV=1                                 | tr C9IZA5 C9IZA5_HUMAN (+2)    | 18 kDa  | 5 | 0 | 3 | 0 |
| Tyrosine-protein phosphatase non-receptor type 6 (Fragment) OS=Homo sapiens GN=PTPN6 PE=4 SV=1                        | tr F5H0N8 F5H0N8_HUMAN (+3)    | 18 kDa  | 3 | 3 | 0 | 0 |
| Liprin-alpha-3 OS=Homo sapiens GN=PPFIA3 PE=2 SV=1                                                                    | tr B4DEU8 B4DEU8_HUMAN         | 66 kDa  | 0 | 2 | 0 | 0 |
| Ankyrin repeat domain-containing protein 26 OS=Homo sapiens GN=ANKRD26 PE=4 SV=1                                      | tr E7ESJ3 E7ESJ3_HUMAN (+1)    | 198 kDa | 2 | 0 | 0 | 0 |
| Uncharacterized protein (Fragment) OS=Homo sapiens PE=4 SV=1                                                          | tr B5MCY1 B5MCY1_HUMAN         | 222 kDa | 2 | 0 | 0 | 0 |
| Serine/threonine-protein kinase MARK2 OS=Homo sapiens GN=MARK2 PE=4 SV=1                                              | tr E7ETY4 E7ETY4_HUMAN (+3)    | 78 kDa  | 0 | 0 | 0 | 3 |
| Probable ubiquitin carboxyl-terminal hydrolase FAF-X OS=Homo sapiens GN=USP9X PE=4 SV=1                               | tr E9PFG1 E9PFG1_HUMAN         | 116 kDa | 2 | 0 | 0 | 0 |
| Selenoprotein P (Fragment) OS=Homo sapiens GN=SEPP1 PE=4 SV=1                                                         | REVtr D6REX5 D6REX5_HUMAN (+1) | 35 kDa  | 0 | 0 | 0 | 2 |
| Glutamine--tRNA ligase OS=Homo sapiens GN=QARS PE=2 SV=1                                                              | tr B4DWJ2 B4DWJ2_HUMAN         | 87 kDa  | 2 | 0 | 3 | 0 |
| Serine/threonine-protein phosphatase 2A catalytic subunit beta isoform (Fragment) OS=Homo sapiens GN=PPP2CB PE=4 SV=1 | tr H0YBN9 H0YBN9_HUMAN         | 6 kDa   | 0 | 0 | 2 | 0 |
| Proteasome subunit alpha type (Fragment) OS=Homo sapiens GN=PSMA4 PE=3 SV=1                                           | tr H0YL69 H0YL69_HUMAN (+10)   | 26 kDa  | 0 | 0 | 3 | 0 |
| 6-phosphofructokinase type C (Fragment) OS=Homo sapiens GN=PFKP PE=4 SV=1                                             | tr B1APP6 B1APP6_HUMAN         | 26 kDa  | 3 | 0 | 3 | 0 |
| Signal transducer and activator of transcription 3 OS=Homo sapiens GN=STAT3 PE=4 SV=1                                 | tr G8JLH9 G8JLH9_HUMAN         | 76 kDa  | 4 | 0 | 2 | 0 |
| Keratin, type II cytoskeletal 7 (Fragment) OS=Homo sapiens GN=KRT7 PE=4 SV=1                                          | tr F8VZY5 F8VZY5_HUMAN (+1)    | 38 kDa  | 0 | 4 | 0 | 0 |
| 26S proteasome non-ATPase regulatory subunit 13 (Fragment) OS=Homo sapiens GN=PSMD13 PE=4 SV=1                        | tr E9PL38 E9PL38_HUMAN (+1)    | 30 kDa  | 5 | 0 | 4 | 0 |
| Heterogeneous nuclear ribonucleoprotein Q (Fragment) OS=Homo sapiens GN=SYNCRIP PE=4 SV=1                             | tr F6UXX1 F6UXX1_HUMAN         | 20 kDa  | 4 | 0 | 5 | 0 |
| Ras suppressor protein 1 OS=Homo sapiens GN=RSU1 PE=4 SV=1                                                            | tr F2Z2H2 F2Z2H2_HUMAN         | 20 kDa  | 0 | 0 | 4 | 0 |
| Casein kinase II subunit alpha OS=Homo sapiens GN=CSNK2A1 PE=4 SV=1                                                   | tr E7EU96 E7EU96_HUMAN         | 45 kDa  | 4 | 0 | 3 | 0 |
| SEC23-interacting protein OS=Homo sapiens GN=SEC23IP PE=4 SV=1                                                        | tr F5H0L8 F5H0L8_HUMAN         | 90 kDa  | 0 | 0 | 4 | 0 |
| DBIRD complex subunit KIAA1967 (Fragment) OS=Homo sapiens GN=KIAA1967 PE=4 SV=1                                       | tr H0YB24 H0YB24_HUMAN (+1)    | 69 kDa  | 2 | 0 | 5 | 0 |
| Nck-associated protein 1-like OS=Homo sapiens GN=NCKAP1L PE=4 SV=1                                                    | tr F8W050 F8W050_HUMAN         | 52 kDa  | 2 | 0 | 3 | 0 |
| Leucine-rich repeat flightless-interacting protein 1 OS=Homo sapiens GN=LRRFIP1 PE=4 SV=1                             | tr E9PGZ2 E9PGZ2_HUMAN         | 73 kDa  | 5 | 0 | 3 | 0 |
| EH domain-containing protein 1 (Fragment) OS=Homo sapiens GN=EHD1 PE=4 SV=1                                           | tr C9JC03 C9JC03_HUMAN         | 43 kDa  | 6 | 0 | 0 | 0 |
| Zinc finger protein 608 (Fragment) OS=Homo sapiens GN=ZNF608 PE=2 SV=1                                                | tr B3KPE6 B3KPE6_HUMAN (+1)    | 74 kDa  | 0 | 2 | 0 | 0 |
| Epidermal growth factor receptor substrate 15-like 1 OS=Homo sapiens GN=EPS15L1 PE=2 SV=1                             | tr B4DME4 B4DME4_HUMAN (+1)    | 84 kDa  | 2 | 0 | 0 | 0 |
| Neuron navigator 2 (Fragment) OS=Homo sapiens GN=NAV2 PE=4 SV=1                                                       | tr E9PNV5 E9PNV5_HUMAN         | 86 kDa  | 0 | 2 | 0 | 0 |
| Testin (Fragment) OS=Homo sapiens GN=TES PE=4 SV=1                                                                    | tr F8W7T0 F8W7T0_HUMAN         | 9 kDa   | 3 | 0 | 3 | 0 |
| Eukaryotic translation initiation factor 5 (Fragment) OS=Homo sapiens GN=EIF5 PE=4 SV=1                               | tr H0YN40 H0YN40_HUMAN (+5)    | 22 kDa  | 3 | 0 | 0 | 0 |
| Fermitin family homolog 3 (Fragment) OS=Homo sapiens GN=FERMT3 PE=4 SV=1                                              | tr H0YFT5 H0YFT5_HUMAN         | 20 kDa  | 2 | 0 | 2 | 0 |
| Serpin B4 (Fragment) OS=Homo sapiens GN=SERPINB4 PE=3 SV=1                                                            | tr H0Y5H9 H0Y5H9_HUMAN (+5)    | 42 kDa  | 3 | 3 | 0 | 0 |
| Valine--tRNA ligase OS=Homo sapiens GN=VARS PE=3 SV=1                                                                 | tr B0V043 B0V043_HUMAN (+5)    | 140 kDa | 0 | 0 | 2 | 0 |
| Leucine--tRNA ligase, cytoplasmic OS=Homo sapiens GN=LARS PE=2 SV=1                                                   | tr B4DER1 B4DER1_HUMAN (+2)    | 131 kDa | 2 | 0 | 3 | 0 |
| Fibrinogen gamma chain OS=Homo sapiens GN=FGG PE=4 SV=1                                                               | tr C9JC84 C9JC84_HUMAN (+3)    | 52 kDa  | 3 | 0 | 0 | 0 |
| Ewing sarcoma breakpoint region 1 OS=Homo sapiens GN=EWSR1 PE=4 SV=1                                                  | tr B0QYK1 B0QYK1_HUMAN (+5)    | 63 kDa  | 0 | 0 | 4 | 0 |
| Keratin, type II cytoskeletal 74 OS=Homo sapiens GN=KRT74 PE=3 SV=1                                                   | tr F8W1S1 F8W1S1_HUMAN         | 59 kDa  | 2 | 0 | 0 | 0 |
| Replication factor C subunit 4 OS=Homo sapiens GN=RFC4 PE=4 SV=1                                                      | tr C9JZ11 C9JZ11_HUMAN (+6)    | 37 kDa  | 0 | 0 | 3 | 2 |
| NSFL1 cofactor p47 OS=Homo sapiens GN=NSFL1C PE=4 SV=1                                                                | tr F2Z2K0 F2Z2K0_HUMAN (+1)    | 30 kDa  | 4 | 0 | 0 | 0 |
| Arf-GAP with SH3 domain, ANK repeat and PH domain-containing protein 1 (Fragment) OS=Homo sapiens GN=ASAP1 PE=4 SV=1  | tr H0YBF7 H0YBF7_HUMAN         | 105 kDa | 0 | 0 | 3 | 0 |

|                                                                                                            |                              |         |   |   |   |   |
|------------------------------------------------------------------------------------------------------------|------------------------------|---------|---|---|---|---|
| Formin-binding protein 1 OS=Homo sapiens GN=FBNBP1 PE=4 SV=1                                               | tr E9PGQ4 E9PGQ4_HUMAN (+2)  | 70 kDa  | 3 | 0 | 3 | 0 |
| EF-hand domain-containing protein D2 (Fragment) OS=Homo sapiens GN=EFHD2 PE=4 SV=1                         | tr H0Y4Y4 H0Y4Y4_HUMAN (+3)  | 19 kDa  | 2 | 0 | 4 | 0 |
| Long-chain-fatty-acid--CoA ligase 1 OS=Homo sapiens GN=ACSL1 PE=2 SV=1                                     | tr B72452 B72452_HUMAN (+5)  | 78 kDa  | 0 | 0 | 4 | 2 |
| Advillin (Fragment) OS=Homo sapiens GN=AVIL PE=4 SV=1                                                      | tr F8VVU1 F8VVU1_HUMAN       | 18 kDa  | 0 | 0 | 4 | 0 |
| Exportin-2 OS=Homo sapiens GN=CSE1L PE=4 SV=1                                                              | tr F8W904 F8W904_HUMAN       | 104 kDa | 6 | 0 | 0 | 0 |
| C-terminal-binding protein 1 (Fragment) OS=Homo sapiens GN=CTBP1 PE=3 SV=1                                 | tr D6RAX2 D6RAX2_HUMAN       | 20 kDa  | 4 | 0 | 2 | 0 |
| Phosphoribosyl pyrophosphate synthase-associated protein 2 OS=Homo sapiens GN=PRPSAP2 PE=2 SV=1            | tr B7ZK21 B7ZK21_HUMAN (+1)  | 36 kDa  | 4 | 0 | 4 | 0 |
| Protein transport protein Sec24B OS=Homo sapiens GN=SEC24B PE=2 SV=1                                       | tr B7ZKM8 B7ZKM8_HUMAN       | 140 kDa | 0 | 0 | 2 | 0 |
| Tubulin tyrosine ligase-like family, member 12 OS=Homo sapiens GN=TLL12 PE=4 SV=1                          | tr B1AH89 B1AH89_HUMAN       | 74 kDa  | 2 | 0 | 0 | 0 |
| N-acetylated-alpha-linked acidic dipeptidase-like protein OS=Homo sapiens GN=NAALADL1 PE=4 SV=1            | tr C9JFW8 C9JFW8_HUMAN (+4)  | 77 kDa  | 0 | 0 | 2 | 0 |
| Structural maintenance of chromosomes protein 6 (Fragment) OS=Homo sapiens GN=SMC6 PE=4 SV=1               | REVtr C9JMN1 C9JMN1_HUMAN    | 85 kDa  | 0 | 0 | 2 | 0 |
| Unconventional myosin-VIIB OS=Homo sapiens GN=MYO7B PE=4 SV=1                                              | tr C9J6C0 C9J6C0_HUMAN (+2)  | 242 kDa | 0 | 0 | 2 | 0 |
| Serine/threonine-protein phosphatase (Fragment) OS=Homo sapiens GN=PPP2CA PE=3 SV=1                        | tr E7ESG8 E7ESG8_HUMAN (+3)  | 17 kDa  | 3 | 0 | 0 | 0 |
| Hsc70-interacting protein (Fragment) OS=Homo sapiens GN=ST13 PE=4 SV=1                                     | tr F6VDH7 F6VDH7_HUMAN       | 18 kDa  | 2 | 0 | 0 | 0 |
| Signal-induced proliferation-associated protein 1 OS=Homo sapiens GN=SIPA1 PE=4 SV=1                       | tr F6RY50 F6RY50_HUMAN (+1)  | 102 kDa | 0 | 0 | 2 | 0 |
| DNA damage-binding protein 1 OS=Homo sapiens GN=DDB1 PE=2 SV=1                                             | tr B4DGO0 B4DGO0_HUMAN (+2)  | 51 kDa  | 0 | 0 | 3 | 0 |
| RAF proto-oncogene serine/threonine-protein kinase OS=Homo sapiens GN=RAF1 PE=2 SV=1                       | tr B4E0X2 B4E0X2_HUMAN (+1)  | 64 kDa  | 0 | 0 | 2 | 0 |
| Ras-related C3 botulinum toxin substrate 2 (Fragment) OS=Homo sapiens GN=RAC2 PE=3 SV=1                    | tr B1AH78 B1AH78_HUMAN (+6)  | 19 kDa  | 0 | 0 | 5 | 0 |
| Regulator of G-protein-signaling 14 (Fragment) OS=Homo sapiens GN=RG514 PE=4 SV=1                          | tr H0Y8W3 H0Y8W3_HUMAN       | 47 kDa  | 0 | 0 | 4 | 0 |
| Dedicator of cytokinesis protein 2 OS=Homo sapiens GN=DOCK2 PE=4 SV=1                                      | tr E5RFJ0 E5RFJ0_HUMAN (+1)  | 119 kDa | 3 | 0 | 2 | 0 |
| HCG2044799 OS=Homo sapiens GN=hCG_2044799 PE=4 SV=1                                                        | tr H3BQZ7 H3BQZ7_HUMAN       | 85 kDa  | 0 | 0 | 4 | 0 |
| Cysteine and glycine-rich protein 1 OS=Homo sapiens GN=CSRP1 PE=4 SV=1                                     | tr E9PP21 E9PP21_HUMAN (+2)  | 17 kDa  | 2 | 0 | 3 | 0 |
| Dnal1 homolog subfamily B member 6 (Fragment) OS=Homo sapiens GN=DNAB6 PE=4 SV=1                           | tr C9J2C4 C9J2C4_HUMAN (+7)  | 25 kDa  | 0 | 0 | 3 | 3 |
| Arginine--tRNA ligase, cytoplasmic OS=Homo sapiens GN=RARS PE=4 SV=1                                       | tr F5H378 F5H378_HUMAN       | 52 kDa  | 3 | 0 | 0 | 0 |
| Rho GTPase-activating protein 9 OS=Homo sapiens GN=ARHGAP9 PE=4 SV=1                                       | tr E9PD9X E9PD9X_HUMAN (+3)  | 71 kDa  | 2 | 0 | 2 | 0 |
| Cell division cycle and apoptosis regulator protein 1 (Fragment) OS=Homo sapiens GN=CCAR1 PE=4 SV=1        | tr F5H1H2 F5H1H2_HUMAN (+2)  | 76 kDa  | 4 | 0 | 4 | 0 |
| Eukaryotic translation initiation factor 4 gamma 2 (Fragment) OS=Homo sapiens GN=EIF4G2 PE=4 SV=1          | tr D3DQV9 D3DQV9_HUMAN (+2)  | 102 kDa | 2 | 0 | 0 | 0 |
| Truncated apolipoprotein A-I OS=Homo sapiens GN=APOA1 PE=4 SV=1                                            | tr F8W696 F8W696_HUMAN       | 28 kDa  | 7 | 0 | 0 | 0 |
| Non-POU domain-containing octamer-binding protein (Fragment) OS=Homo sapiens GN=NONO PE=4 SV=1             | tr C9JYS8 C9JYS8_HUMAN       | 30 kDa  | 3 | 0 | 0 | 0 |
| Protein transport protein Sec23A OS=Homo sapiens GN=SEC23A PE=4 SV=1                                       | tr F5H365 F5H365_HUMAN       | 83 kDa  | 0 | 0 | 5 | 0 |
| Guanylate cyclase soluble subunit alpha-3 OS=Homo sapiens GN=GUCY1A3 PE=3 SV=1                             | tr D6RDW3 D6RDW3_HUMAN       | 70 kDa  | 0 | 0 | 2 | 0 |
| Galactokinase OS=Homo sapiens GN=GALK1 PE=2 SV=1                                                           | tr B4E1G6 B4E1G6_HUMAN       | 45 kDa  | 2 | 0 | 0 | 0 |
| Rho GTPase-activating protein 25 OS=Homo sapiens GN=ARHGAP25 PE=4 SV=1                                     | tr C9JB56 C9JB56_HUMAN (+2)  | 38 kDa  | 0 | 0 | 3 | 0 |
| Cytosol aminopeptidase (Fragment) OS=Homo sapiens GN=LAP3 PE=4 SV=1                                        | tr H0Y9Q1 H0Y9Q1_HUMAN       | 23 kDa  | 2 | 0 | 0 | 0 |
| Endoplasmic reticulum protein OS=Homo sapiens GN=HSP90B1 PE=4 SV=1                                         | tr F8W026 F8W026_HUMAN       | 6 kDa   | 2 | 0 | 0 | 0 |
| SAM domain and HD domain-containing protein 1 OS=Homo sapiens GN=SAMHD1 PE=2 SV=2                          | tr A6NDZ3 A6NDZ3_HUMAN (+4)  | 20 kDa  | 0 | 0 | 4 | 0 |
| 14-3-3 protein epsilon OS=Homo sapiens GN=YWHAE PE=4 SV=1                                                  | tr B4DJF2 B4DJF2_HUMAN       | 11 kDa  | 2 | 0 | 0 | 0 |
| Nucleolin (Fragment) OS=Homo sapiens GN=NCL PE=4 SV=1                                                      | tr H7BY16 H7BY16_HUMAN       | 32 kDa  | 2 | 0 | 0 | 2 |
| Heat shock 105kDa/110kDa protein 1, isoform CRA_b OS=Homo sapiens GN=HSPH1 PE=2 SV=1                       | tr B4DYH1 B4DYH1_HUMAN (+1)  | 97 kDa  | 2 | 0 | 0 | 0 |
| Cytokine receptor-like factor 3 OS=Homo sapiens GN=CRLF3 PE=2 SV=1                                         | tr B4DJU5 B4DJU5_HUMAN       | 36 kDa  | 3 | 0 | 0 | 0 |
| Adducin 1 (Alpha) OS=Homo sapiens GN=ADD1 PE=4 SV=1                                                        | tr A2A3N8 A2A3N8_HUMAN (+3)  | 73 kDa  | 3 | 0 | 2 | 0 |
| Tyrosine-protein phosphatase non-receptor type 12 OS=Homo sapiens GN=PTPN12 PE=4 SV=1                      | tr E9PBR5 E9PBR5_HUMAN (+12) | 74 kDa  | 0 | 0 | 3 | 0 |
| Rho GTPase-activating protein 4 OS=Homo sapiens GN=ARHGAP4 PE=4 SV=1                                       | tr E7EQN5 E7EQN5_HUMAN (+5)  | 103 kDa | 0 | 0 | 2 | 0 |
| Poly(rC)-binding protein 2 OS=Homo sapiens GN=PCBP2 PE=2 SV=1                                              | tr B4DXP5 B4DXP5_HUMAN (+3)  | 34 kDa  | 3 | 0 | 2 | 0 |
| Spliceosome RNA helicase DDX39B OS=Homo sapiens GN=DDX39B PE=4 SV=1                                        | tr F8VQ10 F8VQ10_HUMAN (+5)  | 51 kDa  | 2 | 0 | 2 | 0 |
| Epidermal growth factor receptor pathway substrate 15 OS=Homo sapiens GN=EPS15 PE=4 SV=1                   | tr B1AUU8 B1AUU8_HUMAN (+6)  | 84 kDa  | 2 | 0 | 2 | 0 |
| Protein phosphatase 1B (Fragment) OS=Homo sapiens GN=PPM1B PE=3 SV=2                                       | tr B8ZFF0 B8ZFF0_HUMAN (+2)  | 33 kDa  | 2 | 0 | 0 | 0 |
| 26S proteasome non-ATPase regulatory subunit 7 OS=Homo sapiens GN=PSMD7 PE=2 SV=1                          | tr B4DXI8 B4DXI8_HUMAN (+2)  | 28 kDa  | 3 | 0 | 2 | 0 |
| Phosphoribosyl pyrophosphate synthase-associated protein 1 (Fragment) OS=Homo sapiens GN=PRPSAP1 PE=4 SV=1 | tr C9JNQ3 C9JNQ3_HUMAN       | 12 kDa  | 2 | 0 | 4 | 0 |
| Cytoplasmic dynein 1 light intermediate chain 1 OS=Homo sapiens GN=DYNC1L1 PE=4 SV=1                       | tr E9PHI6 E9PHI6_HUMAN       | 43 kDa  | 3 | 0 | 0 | 0 |
| Aspartate--tRNA ligase, cytoplasmic (Fragment) OS=Homo sapiens GN=DARS PE=3 SV=1                           | tr H7BZ35 H7BZ35_HUMAN       | 22 kDa  | 2 | 0 | 0 | 0 |
| 26S protease regulatory subunit 4 OS=Homo sapiens GN=PSMC1 PE=2 SV=1                                       | tr B4DR63 B4DR63_HUMAN       | 41 kDa  | 4 | 0 | 0 | 0 |
| Serine-threonine kinase receptor-associated protein OS=Homo sapiens GN=STRAP PE=2 SV=1                     | tr B4DNJ6 B4DNJ6_HUMAN       | 40 kDa  | 4 | 0 | 5 | 0 |
| Protein TFG OS=Homo sapiens GN=TFG PE=4 SV=1                                                               | tr G5E9V1 G5E9V1_HUMAN       | 43 kDa  | 5 | 0 | 0 | 0 |
| 40S ribosomal protein S3a OS=Homo sapiens GN=RPS3A PE=3 SV=1                                               | tr D6RAT0 D6RAT0_HUMAN (+4)  | 26 kDa  | 0 | 0 | 3 | 0 |
| Exportin-7 OS=Homo sapiens GN=XPO7 PE=4 SV=1                                                               | tr E7ESC6 E7ESC6_HUMAN (+3)  | 124 kDa | 2 | 0 | 0 | 0 |
| Protein phosphatase 1 regulatory subunit 12C OS=Homo sapiens GN=PPP1R12C PE=2 SV=1                         | tr B4DME2 B4DME2_HUMAN (+1)  | 77 kDa  | 0 | 0 | 0 | 2 |
| Voltage-gated potassium channel subunit beta-2 OS=Homo sapiens GN=KCNAB2 PE=4 SV=2                         | tr E7ESI4 E7ESI4_HUMAN       | 18 kDa  | 2 | 0 | 0 | 0 |

TOM1-like protein 2 OS=Homo sapiens GN=TOM1L2 PE=2 SV=1  
 Peptidyl-prolyl cis-trans isomerase OS=Homo sapiens GN=PPIA PE=3 SV=1  
 14-3-3 protein eta (Fragment) OS=Homo sapiens GN=YWHAH PE=4 SV=1  
 Hexokinase-2 OS=Homo sapiens GN=HK2 PE=3 SV=1  
 COP9 signalosome complex subunit 2 OS=Homo sapiens GN=COPS2 PE=2 SV=1  
 Cleavage and polyadenylation-specificity factor subunit 6 OS=Homo sapiens GN=CPSP6 PE=4 SV=1  
 60S ribosomal protein L23a OS=Homo sapiens GN=RPL23A PE=3 SV=1  
 Phosphorylase (Fragment) OS=Homo sapiens GN=PYGB PE=3 SV=1  
 Switch-associated protein 70 OS=Homo sapiens GN=SWAP70 PE=4 SV=1  
 ARP1 actin-related protein 1 homolog B, contractin beta (Yeast), isoform CRA\_c OS=Homo sapiens GN=ACTR1B PE=3 SV=1  
 Cytoplasmic dynein 1 heavy chain 1 (Fragment) OS=Homo sapiens GN=DYNC1H1 PE=4 SV=1  
 Thioredoxin-like 1, isoform CRA\_b OS=Homo sapiens GN=TXNL1 PE=4 SV=1  
 Copine-3 (Fragment) OS=Homo sapiens GN=CPNE3 PE=4 SV=1  
 Proline-serine-threonine phosphatase-interacting protein 1 OS=Homo sapiens GN=PSTPIP1 PE=4 SV=1  
 Eukaryotic translation initiation factor 3 subunit L OS=Homo sapiens GN=EIF3EIP PE=4 SV=1  
 6-phosphofructokinase type C OS=Homo sapiens GN=PFKP PE=2 SV=1  
 Protein phosphatase 1 regulatory subunit 12A (Fragment) OS=Homo sapiens GN=PPP1R12A PE=4 SV=1  
 Importin-5 OS=Homo sapiens GN=IPO5 PE=2 SV=1  
 Coatomer subunit gamma-1 (Fragment) OS=Homo sapiens GN=COPG1 PE=4 SV=1  
 V-type proton ATPase subunit E 1 (Fragment) OS=Homo sapiens GN=ATP6V1E1 PE=4 SV=1  
 Ribose-phosphate pyrophosphokinase 2 OS=Homo sapiens GN=PRPS2 PE=4 SV=1  
 Haptoglobin (Fragment) OS=Homo sapiens GN=HP PE=3 SV=1  
 Hypoxia up-regulated protein 1 OS=Homo sapiens GN=HYOU1 PE=3 SV=1  
 Heat shock 70 kDa protein 4L OS=Homo sapiens GN=HSPA4L PE=3 SV=2  
 Exophilin-5 OS=Homo sapiens GN=EXPH5 PE=4 SV=1  
 Elongator complex protein 1 OS=Homo sapiens GN=IKBKAP PE=4 SV=1  
 Plectin (Fragment) OS=Homo sapiens GN=PLEC PE=4 SV=1  
 Striatin-3 OS=Homo sapiens GN=STRN3 PE=4 SV=1  
 ELAV-like protein 1 OS=Homo sapiens GN=ELAVL1 PE=2 SV=1  
 ATP-dependent RNA helicase DDX19B OS=Homo sapiens GN=DDX19B PE=4 SV=1  
 FAD-AMP lyase (cyclizing) (Fragment) OS=Homo sapiens GN=DAK PE=4 SV=1  
 Phosphatidylinositol 3,4,5-trisphosphate-dependent Rac exchanger 1 protein (Fragment) OS=Homo sapiens GN=PREX1 PE=4 SV=1  
 CAP-Gly domain-containing linker protein 1 (Fragment) OS=Homo sapiens GN=CLIP1 PE=4 SV=1  
 Sorting nexin-2 OS=Homo sapiens GN=SNX2 PE=2 SV=1  
 Mitogen-activated protein kinase 14 OS=Homo sapiens GN=MAPK14 PE=2 SV=1  
 V-type proton ATPase subunit B, kidney isoform OS=Homo sapiens GN=ATP6V1B1 PE=3 SV=1  
 Cytoplasmic dynein 1 intermediate chain 2 OS=Homo sapiens GN=DYNC1I2 PE=2 SV=1  
 Aspartate--tRNA ligase, cytoplasmic (Fragment) OS=Homo sapiens GN=DARS PE=4 SV=1  
 Fructose-bisphosphate aldolase OS=Homo sapiens GN=ALDOC PE=3 SV=1  
 Nuclear receptor-binding protein OS=Homo sapiens GN=NRBP1 PE=4 SV=1  
 Interferon-induced GTP-binding protein Mx1, N-terminally processed OS=Homo sapiens GN=MX1 PE=3 SV=1  
 Matrin-3 OS=Homo sapiens GN=MATR3 PE=4 SV=1  
 ER degradation-enhancing alpha-mannosidase-like 3 (Fragment) OS=Homo sapiens GN=EDEM3 PE=4 SV=1  
 Calcium/calmodulin-dependent protein kinase type II subunit gamma (Fragment) OS=Homo sapiens GN=CAMK2G PE=4 SV=1  
 DENN domain-containing protein 4B (Fragment) OS=Homo sapiens GN=DENND4B PE=4 SV=1  
 Nuclear pore complex-interacting protein-like 3 OS=Homo sapiens GN=NPIPL3 PE=4 SV=1  
 Fibroblast growth factor receptor OS=Homo sapiens GN=FGFR3 PE=3 SV=1  
 Ras GTPase-activating-like protein IQGAP2 OS=Homo sapiens GN=IQGAP2 PE=4 SV=1  
 Coronin OS=Homo sapiens GN=CORO1B PE=3 SV=1  
 Nuclear factor NF-kappa-B p105 subunit (Fragment) OS=Homo sapiens GN=NFKB1 PE=4 SV=1  
 Splicing factor, proline- and glutamine-rich (Fragment) OS=Homo sapiens GN=SFPQ PE=4 SV=1  
 Ubiquitin carboxyl-terminal hydrolase OS=Homo sapiens GN=USP15 PE=3 SV=2  
 Heterogeneous nuclear ribonucleoproteins C1/C2 OS=Homo sapiens GN=HNRNPC PE=2 SV=1  
 WD repeat-containing protein 61 OS=Homo sapiens GN=WDR61 PE=4 SV=1  
 Brefeldin A-inhibited guanine nucleotide-exchange protein 1 OS=Homo sapiens GN=ARFGEF1 PE=4 SV=1  
 4-trimethylaminobutylaldehyde dehydrogenase OS=Homo sapiens GN=ALDH9A1 PE=2 SV=1  
 AMP deaminase 3 OS=Homo sapiens GN=AMPD3 PE=4 SV=1  
 Serine/threonine-protein phosphatase 6 catalytic subunit OS=Homo sapiens GN=PPP6C PE=2 SV=1

|                                 |         |   |   |   |   |
|---------------------------------|---------|---|---|---|---|
| REVtr B7Z2L7 B7Z2L7_HUMAN (+10) | 53 kDa  | 0 | 0 | 2 | 0 |
| tr C9J5S7 C9J5S7_HUMAN (+1)     | 13 kDa  | 2 | 0 | 0 | 0 |
| tr A2IDB2 A2IDB2_HUMAN (+1)     | 19 kDa  | 0 | 0 | 2 | 2 |
| tr E9PB90 E9PB90_HUMAN (+1)     | 99 kDa  | 2 | 0 | 0 | 0 |
| tr B4DIH5 B4DIH5_HUMAN          | 44 kDa  | 0 | 0 | 2 | 0 |
| tr F8WJN3 F8WJN3_HUMAN          | 52 kDa  | 2 | 0 | 0 | 3 |
| tr A8MUS3 A8MUS3_HUMAN (+1)     | 22 kDa  | 0 | 0 | 2 | 0 |
| tr HOY4Z6 HOY4Z6_HUMAN (+1)     | 27 kDa  | 2 | 0 | 2 | 0 |
| tr E7EMB1 E7EMB1_HUMAN (+1)     | 62 kDa  | 3 | 0 | 0 | 0 |
| tr G5E9Q5 G5E9Q5_HUMAN          | 17 kDa  | 2 | 0 | 0 | 0 |
| tr HOYJ21 HOYJ21_HUMAN          | 21 kDa  | 3 | 0 | 0 | 0 |
| tr G3V1K0 G3V1K0_HUMAN          | 19 kDa  | 3 | 0 | 0 | 0 |
| tr E5RG68 E5RG68_HUMAN (+4)     | 27 kDa  | 4 | 0 | 0 | 0 |
| tr C9K004 C9K004_HUMAN (+2)     | 45 kDa  | 2 | 0 | 0 | 0 |
| tr B0QY89 B0QY89_HUMAN (+6)     | 71 kDa  | 4 | 0 | 0 | 0 |
| tr B1APP8 B1APP8_HUMAN (+1)     | 23 kDa  | 2 | 0 | 3 | 0 |
| tr HOYIM2 HOYIM2_HUMAN (+1)     | 22 kDa  | 0 | 0 | 0 | 3 |
| tr B4E0R6 B4E0R6_HUMAN (+1)     | 109 kDa | 4 | 0 | 0 | 0 |
| tr HOY8X7 HOY8X7_HUMAN          | 21 kDa  | 3 | 0 | 2 | 0 |
| tr C9J8H1 C9J8H1_HUMAN          | 24 kDa  | 3 | 0 | 2 | 0 |
| tr D3YTJ7 D3YTJ7_HUMAN          | 22 kDa  | 2 | 0 | 2 | 0 |
| tr H3BS21 H3BS21_HUMAN (+2)     | 25 kDa  | 2 | 0 | 0 | 0 |
| tr E9PL22 E9PL22_HUMAN (+1)     | 105 kDa | 2 | 0 | 0 | 0 |
| tr E7E543 E7E543_HUMAN (+2)     | 98 kDa  | 0 | 0 | 2 | 0 |
| tr E7ENT4 E7ENT4_HUMAN (+3)     | 213 kDa | 0 | 2 | 0 | 0 |
| REVtr F5H2T0 F5H2T0_HUMAN       | 111 kDa | 0 | 0 | 0 | 2 |
| tr E9PMV1 E9PMV1_HUMAN          | 81 kDa  | 0 | 0 | 3 | 0 |
| tr G3V340 G3V340_HUMAN (+1)     | 36 kDa  | 0 | 0 | 2 | 0 |
| tr B4DV88 B4DV88_HUMAN          | 39 kDa  | 2 | 0 | 2 | 0 |
| tr H3BQK0 H3BQK0_HUMAN (+1)     | 55 kDa  | 2 | 0 | 0 | 2 |
| tr HOYCY6 HOYCY6_HUMAN (+2)     | 55 kDa  | 3 | 0 | 0 | 0 |
| tr HOYDZ4 HOYDZ4_HUMAN          | 98 kDa  | 2 | 0 | 0 | 0 |
| tr F5H6A0 F5H6A0_HUMAN (+2)     | 90 kDa  | 0 | 0 | 2 | 0 |
| tr B4DEK4 B4DEK4_HUMAN (+2)     | 46 kDa  | 3 | 0 | 2 | 0 |
| tr B4E0K5 B4E0K5_HUMAN (+9)     | 32 kDa  | 5 | 0 | 0 | 0 |
| tr C9JL73 C9JL73_HUMAN (+4)     | 55 kDa  | 3 | 0 | 0 | 0 |
| tr B7ZA04 B7ZA04_HUMAN (+1)     | 70 kDa  | 3 | 0 | 3 | 0 |
| tr C9J7S3 C9J7S3_HUMAN (+2)     | 20 kDa  | 2 | 0 | 0 | 0 |
| tr A8MVZ9 A8MVZ9_HUMAN          | 36 kDa  | 5 | 0 | 0 | 0 |
| tr F8W6G1 F8W6G1_HUMAN (+3)     | 61 kDa  | 0 | 0 | 2 | 0 |
| tr F8W8T1 F8W8T1_HUMAN          | 73 kDa  | 0 | 0 | 2 | 0 |
| tr A8MXP9 A8MXP9_HUMAN (+8)     | 100 kDa | 0 | 0 | 2 | 0 |
| tr HOY498 HOY498_HUMAN (+1)     | 42 kDa  | 0 | 0 | 2 | 0 |
| tr HOY6G2 HOY6G2_HUMAN (+3)     | 37 kDa  | 2 | 0 | 0 | 0 |
| tr E9PAK5 E9PAK5_HUMAN          | 133 kDa | 0 | 0 | 2 | 0 |
| tr F5H7B8 F5H7B8_HUMAN          | 117 kDa | 2 | 0 | 0 | 0 |
| tr F8W9L4 F8W9L4_HUMAN          | 85 kDa  | 0 | 0 | 2 | 0 |
| tr F5H7S7 F5H7S7_HUMAN (+3)     | 124 kDa | 0 | 0 | 2 | 0 |
| tr E7EW44 E7EW44_HUMAN (+2)     | 32 kDa  | 0 | 3 | 0 | 0 |
| tr D6RF93 D6RF93_HUMAN          | 21 kDa  | 2 | 0 | 0 | 0 |
| tr HOY9K7 HOY9K7_HUMAN (+1)     | 26 kDa  | 0 | 0 | 0 | 2 |
| tr E9PCQ3 E9PCQ3_HUMAN          | 110 kDa | 2 | 0 | 3 | 0 |
| tr B4DSU6 B4DSU6_HUMAN (+12)    | 16 kDa  | 0 | 0 | 2 | 0 |
| tr HOYMF9 HOYMF9_HUMAN (+3)     | 21 kDa  | 2 | 0 | 2 | 0 |
| tr E5RIF2 E5RIF2_HUMAN (+1)     | 143 kDa | 3 | 0 | 0 | 0 |
| tr B4DXY7 B4DXY7_HUMAN          | 46 kDa  | 4 | 0 | 0 | 0 |
| tr E9PKC5 E9PKC5_HUMAN (+4)     | 78 kDa  | 2 | 0 | 2 | 0 |
| tr B7Z3E2 B7Z3E2_HUMAN          | 18 kDa  | 2 | 0 | 0 | 0 |



Cullin-associated NEDD8-dissociated protein 1 (Fragment) OS=Homo sapiens GN=CAND1 PE=4 SV=1  
 Eukaryotic peptide chain release factor subunit 1 OS=Homo sapiens GN=ETF1 PE=2 SV=1  
 Activator of 90 kDa heat shock protein ATPase homolog 1 OS=Homo sapiens GN=AHS1 PE=2 SV=1  
 Phosphatidylinositol 3,4,5-trisphosphate 5-phosphatase 1 (Fragment) OS=Homo sapiens GN=INPP5D PE=4 SV=1  
 Ras GTPase-activating protein-binding protein 1 OS=Homo sapiens GN=G3BP1 PE=4 SV=1  
 DNA-(apurinic or apyrimidinic site) lyase (Fragment) OS=Homo sapiens GN=APEX1 PE=4 SV=1  
 COP9 signalosome complex subunit 6 OS=Homo sapiens GN=COP56 PE=4 SV=1  
 Proteasome subunit beta type OS=Homo sapiens GN=PSMB9 PE=3 SV=1  
 Sorting nexin 6, isoform CRA\_e OS=Homo sapiens GN=SNX6 PE=2 SV=1  
 Puromycin-sensitive aminopeptidase OS=Homo sapiens GN=NPEPPS PE=4 SV=1  
 DEAD (Asp-Glu-Ala-Asp) box polypeptide 58 OS=Homo sapiens GN=DDX58 PE=4 SV=1  
 Regulator of chromosome condensation (Fragment) OS=Homo sapiens GN=RCC1 PE=4 SV=1  
 WD repeat-containing protein 44 OS=Homo sapiens GN=WDR44 PE=4 SV=1  
 Uncharacterized protein (Fragment) OS=Homo sapiens PE=4 SV=1  
 40S ribosomal protein S3 OS=Homo sapiens GN=RPS3 PE=4 SV=1  
 Fibrinogen beta chain OS=Homo sapiens GN=FGB PE=4 SV=1  
 Alpha-actinin-4 OS=Homo sapiens GN=ACTN4 PE=4 SV=1  
 Replication factor C subunit 5 OS=Homo sapiens GN=RFC5 PE=4 SV=1  
 Copine I OS=Homo sapiens GN=CPNE1 PE=4 SV=1  
 Endoplasmic (Fragment) OS=Homo sapiens GN=HSP90B1 PE=4 SV=1  
 Ribosomal protein S6 kinase alpha-3 OS=Homo sapiens GN=RPS6KA3 PE=2 SV=1  
 Rap1 GTPase-GDP dissociation stimulator 1 OS=Homo sapiens GN=RAP1GDS1 PE=4 SV=1  
 26S proteasome non-ATPase regulatory subunit 4 (Fragment) OS=Homo sapiens GN=PSMD4 PE=4 SV=1  
 Phospholipase A-2-activating protein OS=Homo sapiens GN=PLAA PE=4 SV=1  
 Serine/threonine-protein kinase PAK 1 OS=Homo sapiens GN=PAK1 PE=2 SV=1  
 Proteasome activator complex subunit 1 OS=Homo sapiens GN=PSME1 PE=4 SV=2  
 14-3-3 protein zeta/delta OS=Homo sapiens GN=YWHAZ PE=2 SV=1  
 tRNA-splicing ligase RtcB homolog OS=Homo sapiens GN=C22orf28 PE=4 SV=2  
 Actinin, alpha 2, isoform CRA\_b OS=Homo sapiens GN=ACTN2 PE=2 SV=1  
 Histidine-tRNA ligase, cytoplasmic OS=Homo sapiens GN=HARS PE=4 SV=1  
 Annexin OS=Homo sapiens GN=ANXA5 PE=3 SV=1  
 Actin-related protein 10 OS=Homo sapiens GN=ACTR10 PE=4 SV=1  
 40S ribosomal protein S4, Y isoform 1 (Fragment) OS=Homo sapiens GN=RPS4Y1 PE=4 SV=1  
 Immunoglobulin lambda-like polypeptide 5 OS=Homo sapiens GN=IGLL5 PE=2 SV=2  
 40S ribosomal protein S3a (Fragment) OS=Homo sapiens GN=RPS3A PE=3 SV=1  
 Abi interactor 1 OS=Homo sapiens GN=ABI1 PE=4 SV=2  
 tRNA pseudouridine synthase OS=Homo sapiens GN=PUS1 PE=3 SV=1  
 Coiled-coil domain-containing protein 93 OS=Homo sapiens GN=CCDC93 PE=4 SV=1  
 Myelin expression factor 2 (Fragment) OS=Homo sapiens GN=MYEF2 PE=4 SV=1  
 ATPase, H+ transporting, lysosomal 50/57kDa, V1 subunit H, isoform CRA\_c OS=Homo sapiens GN=ATP6V1H PE=4 SV=1  
 Serine/threonine-protein kinase 3 36kDa subunit OS=Homo sapiens GN=STK3 PE=2 SV=1  
 GRB2-related adapter protein 2 (Fragment) OS=Homo sapiens GN=GRAP2 PE=4 SV=1  
 Coronin OS=Homo sapiens GN=CORO1C PE=2 SV=1  
 Eukaryotic translation initiation factor 3 subunit D (Fragment) OS=Homo sapiens GN=EIF3D PE=4 SV=1  
 Asparagine--tRNA ligase, cytoplasmic OS=Homo sapiens GN=NARS PE=2 SV=1  
 Electron transfer flavoprotein subunit alpha, mitochondrial OS=Homo sapiens GN=ETFA PE=4 SV=1  
 Exportin-1 (Fragment) OS=Homo sapiens GN=XPO1 PE=4 SV=1  
 Proteasome subunit beta type-5 OS=Homo sapiens GN=PSMB5 PE=3 SV=1  
 S-adenosylmethionine synthase OS=Homo sapiens GN=MAT2A PE=2 SV=1  
 Phosphatidylinositol transfer protein beta isoform OS=Homo sapiens GN=PITPNB PE=2 SV=1  
 Serine/threonine-protein phosphatase 2A catalytic subunit beta isoform (Fragment) OS=Homo sapiens GN=PPP2CB PE=4 SV=1  
 T-complex protein 1 subunit eta OS=Homo sapiens GN=CCT7 PE=3 SV=1  
 Nuclear factor NF-kappa-B p105 subunit (Fragment) OS=Homo sapiens GN=NFKB1 PE=4 SV=1  
 Serine/threonine-protein phosphatase 2A 65 kDa regulatory subunit A beta isoform OS=Homo sapiens GN=PPP2R1B PE=4 SV=2  
 Protein phosphatase 1 regulatory subunit 12C OS=Homo sapiens GN=PPP1R12C PE=4 SV=2  
 V-type proton ATPase subunit D OS=Homo sapiens GN=ATP6V1D PE=4 SV=1  
 Eukaryotic translation initiation factor 3 subunit J OS=Homo sapiens GN=EIF3J PE=4 SV=1  
 Arachidonate 15-lipoxygenase OS=Homo sapiens GN=ALOX15 PE=2 SV=1

|                                |         |   |   |   |   |
|--------------------------------|---------|---|---|---|---|
| tr H0YH27 H0YH27_HUMAN         | 50 kDa  | 2 | 0 | 0 | 0 |
| tr B7Z7P8 B7Z7P8_HUMAN         | 47 kDa  | 2 | 0 | 0 | 0 |
| tr B4DU09 B4DU09_HUMAN (+2)    | 32 kDa  | 2 | 0 | 2 | 0 |
| tr H0Y5Q9 H0Y5Q9_HUMAN         | 91 kDa  | 0 | 0 | 3 | 0 |
| tr F5H4D6 F5H4D6_HUMAN         | 31 kDa  | 2 | 0 | 2 | 0 |
| tr G3V359 G3V359_HUMAN (+4)    | 19 kDa  | 2 | 0 | 2 | 0 |
| tr E7EM64 E7EM64_HUMAN         | 36 kDa  | 3 | 0 | 0 | 0 |
| tr A2ACR1 A2ACR1_HUMAN (+1)    | 21 kDa  | 0 | 0 | 2 | 0 |
| tr B4DJ57 B4DJ57_HUMAN         | 34 kDa  | 3 | 0 | 0 | 0 |
| tr E9PLK3 E9PLK3_HUMAN         | 103 kDa | 2 | 0 | 0 | 0 |
| tr A2A376 A2A376_HUMAN (+2)    | 83 kDa  | 0 | 0 | 2 | 0 |
| tr C9JW69 C9JW69_HUMAN (+4)    | 40 kDa  | 0 | 0 | 2 | 0 |
| tr F8W913 F8W913_HUMAN (+1)    | 91 kDa  | 2 | 0 | 0 | 0 |
| tr H0YHG0 H0YHG0_HUMAN         | 59 kDa  | 2 | 0 | 2 | 0 |
| tr E9PL45 E9PL45_HUMAN (+11)   | 18 kDa  | 0 | 0 | 3 | 0 |
| tr D6REL8 D6REL8_HUMAN         | 31 kDa  | 2 | 0 | 0 | 0 |
| tr F5GSX2 F5GSX2_HUMAN         | 60 kDa  | 0 | 0 | 2 | 0 |
| tr F8W9B4 F8W9B4_HUMAN (+3)    | 29 kDa  | 0 | 0 | 2 | 0 |
| tr A6PVH9 A6PVH9_HUMAN (+4)    | 53 kDa  | 2 | 0 | 0 | 0 |
| tr H0YV0 H0YV0_HUMAN           | 17 kDa  | 2 | 0 | 0 | 0 |
| tr B4DG22 B4DG22_HUMAN (+4)    | 81 kDa  | 2 | 0 | 0 | 0 |
| tr E9PH06 E9PH06_HUMAN (+3)    | 57 kDa  | 3 | 0 | 0 | 0 |
| tr H0Y3Y9 H0Y3Y9_HUMAN (+1)    | 21 kDa  | 2 | 0 | 0 | 0 |
| tr E5RIM3 E5RIM3_HUMAN         | 67 kDa  | 0 | 0 | 2 | 0 |
| tr B3KNX7 B3KNX7_HUMAN (+2)    | 58 kDa  | 3 | 0 | 0 | 0 |
| tr A6NJG9 A6NJG9_HUMAN (+2)    | 29 kDa  | 2 | 0 | 0 | 0 |
| tr B0AZS6 B0AZS6_HUMAN (+4)    | 19 kDa  | 0 | 0 | 0 | 2 |
| tr E7EQS9 E7EQS9_HUMAN         | 19 kDa  | 3 | 0 | 0 | 0 |
| tr B2RC55 B2RC55_HUMAN (+1)    | 104 kDa | 0 | 0 | 2 | 0 |
| tr D6REN6 D6REN6_HUMAN (+5)    | 55 kDa  | 4 | 0 | 0 | 0 |
| tr D6RBE9 D6RBE9_HUMAN (+3)    | 25 kDa  | 2 | 0 | 3 | 0 |
| tr F6S9Y6 F6S9Y6_HUMAN (+3)    | 21 kDa  | 2 | 0 | 0 | 0 |
| tr C9JEH7 C9JEH7_HUMAN         | 29 kDa  | 0 | 0 | 4 | 0 |
| sp B9A064 IGLL5_HUMAN (+1)     | 23 kDa  | 3 | 0 | 0 | 0 |
| tr D6RG13 D6RG13_HUMAN (+11)   | 26 kDa  | 2 | 0 | 0 | 0 |
| tr A6NFN2 A6NFN2_HUMAN (+3)    | 55 kDa  | 4 | 0 | 0 | 0 |
| tr F5H1S9 F5H1S9_HUMAN (+1)    | 42 kDa  | 0 | 0 | 2 | 0 |
| tr F8W9X7 F8W9X7_HUMAN         | 73 kDa  | 2 | 0 | 0 | 0 |
| tr H0YN19 H0YN19_HUMAN         | 31 kDa  | 0 | 2 | 0 | 0 |
| tr G3V126 G3V126_HUMAN         | 52 kDa  | 2 | 0 | 2 | 0 |
| tr B3KYA7 B3KYA7_HUMAN (+2)    | 59 kDa  | 2 | 0 | 0 | 0 |
| tr B1AH86 B1AH86_HUMAN (+1)    | 11 kDa  | 2 | 0 | 0 | 0 |
| tr A7MAP1 A7MAP1_HUMAN (+7)    | 59 kDa  | 2 | 2 | 0 | 0 |
| tr B0QYA3 B0QYA3_HUMAN (+2)    | 20 kDa  | 2 | 0 | 0 | 0 |
| tr B4DN60 B4DN60_HUMAN (+1)    | 35 kDa  | 3 | 0 | 0 | 0 |
| REVtr H0YK49 H0YK49_HUMAN (+4) | 24 kDa  | 0 | 2 | 0 | 0 |
| tr C9JW69 C9JW69_HUMAN (+5)    | 21 kDa  | 2 | 0 | 0 | 0 |
| tr E9PAV2 E9PAV2_HUMAN         | 18 kDa  | 2 | 0 | 0 | 0 |
| tr B4DN45 B4DN45_HUMAN         | 33 kDa  | 2 | 0 | 0 | 0 |
| tr B7Z7Q0 B7Z7Q0_HUMAN         | 32 kDa  | 0 | 0 | 2 | 0 |
| tr H0YC23 H0YC23_HUMAN         | 14 kDa  | 3 | 0 | 0 | 0 |
| tr F5GZK5 F5GZK5_HUMAN         | 49 kDa  | 2 | 0 | 0 | 0 |
| tr D6RH30 D6RH30_HUMAN (+1)    | 22 kDa  | 2 | 0 | 0 | 0 |
| tr A8MY67 A8MY67_HUMAN (+1)    | 52 kDa  | 0 | 0 | 2 | 0 |
| tr B5MEC7 B5MEC7_HUMAN         | 78 kDa  | 0 | 3 | 0 | 0 |
| tr G3V559 G3V559_HUMAN (+5)    | 20 kDa  | 2 | 0 | 0 | 0 |
| tr F5H425 F5H425_HUMAN (+1)    | 23 kDa  | 0 | 0 | 2 | 0 |
| tr B7ZA11 B7ZA11_HUMAN (+1)    | 70 kDa  | 2 | 0 | 0 | 0 |

26S proteasome non-ATPase regulatory subunit 4 (Fragment) OS=Homo sapiens GN=PSMD4 PE=4 SV=1  
 Extracellular matrix protein FRAS1 OS=Homo sapiens GN=FRAS1 PE=4 SV=1  
 Collagen alpha-3(VI) chain OS=Homo sapiens GN=COL6A3 PE=4 SV=1  
 Protein FRG1 (Fragment) OS=Homo sapiens GN=FRG1 PE=4 SV=1  
 Regulation of nuclear pre-mRNA domain containing 1B (Fragment) OS=Homo sapiens GN=RPRD1B PE=4 SV=1  
 1-phosphatidylinositol 4,5-bisphosphate phosphodiesterase gamma-2 (Fragment) OS=Homo sapiens GN=PLCG2 PE=4 SV=1  
 Rho GTPase-activating protein 1 (Fragment) OS=Homo sapiens GN=ARHGAP1 PE=4 SV=1  
 Glutathione synthetase OS=Homo sapiens GN=GSS PE=2 SV=1  
 Uncharacterized protein OS=Homo sapiens PE=4 SV=1  
 Splicing factor 3B subunit 2 OS=Homo sapiens GN=SF3B2 PE=4 SV=1  
 DnaJ homolog subfamily A member 1 OS=Homo sapiens GN=DNAJA1 PE=2 SV=1  
 Cleavage and polyadenylation-specificity factor subunit 5 (Fragment) OS=Homo sapiens GN=NUDT21 PE=4 SV=1  
 Mannose-1-phosphate guanyltransferase alpha OS=Homo sapiens GN=GMPPA PE=4 SV=1  
 Isocitrate dehydrogenase [NADP] cytoplasmic (Fragment) OS=Homo sapiens GN=IDH1 PE=3 SV=1  
 Protein transport protein Sec23A OS=Homo sapiens GN=SEC23A PE=4 SV=1  
 Alpha-1-antichymotrypsin OS=Homo sapiens GN=SERPINA3 PE=3 SV=1  
 Ubiquitin carboxyl-terminal hydrolase OS=Homo sapiens GN=USP14 PE=3 SV=2  
 Heat shock cognate 71 kDa protein (Fragment) OS=Homo sapiens GN=HSPA8 PE=3 SV=1  
 Peptidyl-prolyl cis-trans isomerase (Fragment) OS=Homo sapiens GN=FKBP4 PE=4 SV=1  
 GDP dissociation inhibitor 1, isoform CRA\_a OS=Homo sapiens GN=GDI1 PE=4 SV=1  
 Guanine nucleotide-binding protein subunit beta-2-like 1 (Fragment) OS=Homo sapiens GN=GNB2L1 PE=4 SV=1  
 Serine/threonine-protein phosphatase (Fragment) OS=Homo sapiens GN=PPP5C PE=3 SV=1  
 Glucosamine-6-phosphate isomerase 1 OS=Homo sapiens GN=GNPDA1 PE=3 SV=1  
 Zinc finger protein 207 OS=Homo sapiens GN=ZNF207 PE=4 SV=1  
 BRCA1-A complex subunit BRE (Fragment) OS=Homo sapiens GN=BRE PE=4 SV=1  
 DNA polymerase beta OS=Homo sapiens GN=POLB PE=4 SV=1  
 Neurobeachin-like protein 2 (Fragment) OS=Homo sapiens GN=NBEAL2 PE=4 SV=1  
 Small nuclear ribonucleoprotein-associated protein OS=Homo sapiens GN=SNRPN PE=2 SV=1  
 Plectin (Fragment) OS=Homo sapiens GN=PLEC PE=4 SV=1  
 Glycogen synthase kinase-3 alpha OS=Homo sapiens GN=GSK3A PE=4 SV=2  
 Rho guanine nucleotide exchange factor 10 OS=Homo sapiens GN=ARHGEF10 PE=4 SV=1  
 Lymphocyte antigen 6K OS=Homo sapiens GN=LY6K PE=4 SV=2  
 General transcription factor 3C polypeptide 5 OS=Homo sapiens GN=GTF3C5 PE=4 SV=1  
 Phosphatidylinositol 3-kinase regulatory subunit alpha (Fragment) OS=Homo sapiens GN=PIK3R1 PE=4 SV=1  
 UPF0505 protein C16orf62 OS=Homo sapiens GN=C16orf62 PE=4 SV=1  
 Target of Myb protein 1 OS=Homo sapiens GN=TOM1 PE=4 SV=1  
 NF-kappa-B essential modulator OS=Homo sapiens GN=IKBK G PE=4 SV=2  
 Coatomer subunit zeta-1 OS=Homo sapiens GN=COPZ1 PE=4 SV=1  
 Unconventional myosin-le (Fragment) OS=Homo sapiens GN=MYO1E PE=4 SV=1  
 Polyribonucleotide 5'-hydroxyl-kinase Clp1 OS=Homo sapiens GN=CLP1 PE=4 SV=1  
 Tyrosine-protein kinase CSK (Fragment) OS=Homo sapiens GN=CSK PE=4 SV=1  
 Histidine ammonia-lyase (Fragment) OS=Homo sapiens GN=HAL PE=4 SV=1

|                              |         |   |   |   |   |
|------------------------------|---------|---|---|---|---|
| tr A6PVX3 A6PVX3_HUMAN       | 22 kDa  | 4 | 0 | 0 | 0 |
| tr E9PHH6 E9PHH6_HUMAN       | 444 kDa | 2 | 0 | 0 | 0 |
| REVtr E9PCV6 E9PCV6_HUMAN    | 322 kDa | 3 | 0 | 0 | 0 |
| tr E9PRR7 E9PRR7_HUMAN (+1)  | 13 kDa  | 0 | 0 | 2 | 0 |
| tr A2A2M0 A2A2M0_HUMAN       | 22 kDa  | 2 | 0 | 0 | 0 |
| tr H3BPZ3 H3BPZ3_HUMAN       | 21 kDa  | 0 | 0 | 2 | 0 |
| tr H0YE29 H0YE29_HUMAN       | 38 kDa  | 2 | 0 | 0 | 0 |
| tr B7Z514 B7Z514_HUMAN (+1)  | 38 kDa  | 2 | 0 | 0 | 0 |
| tr E5RGS7 E5RGS7_HUMAN (+2)  | 14 kDa  | 0 | 0 | 2 | 0 |
| tr E9PPJ0 E9PPJ0_HUMAN (+3)  | 98 kDa  | 2 | 0 | 0 | 0 |
| tr B7Z5C0 B7Z5C0_HUMAN       | 28 kDa  | 0 | 0 | 0 | 2 |
| tr H3BND3 H3BND3_HUMAN       | 17 kDa  | 0 | 0 | 0 | 2 |
| tr F8WD54 F8WD54_HUMAN (+2)  | 32 kDa  | 2 | 0 | 0 | 0 |
| tr C9J4N6 C9J4N6_HUMAN       | 18 kDa  | 2 | 0 | 0 | 0 |
| tr F5H6C4 F5H6C4_HUMAN (+2)  | 74 kDa  | 2 | 0 | 0 | 0 |
| tr G3V5I3 G3V5I3_HUMAN (+12) | 51 kDa  | 2 | 0 | 0 | 0 |
| tr A6NJA2 A6NJA2_HUMAN (+1)  | 51 kDa  | 3 | 0 | 0 | 0 |
| tr E9PI65 E9PI65_HUMAN (+4)  | 18 kDa  | 2 | 0 | 0 | 0 |
| tr F5H1U3 F5H1U3_HUMAN       | 10 kDa  | 2 | 0 | 0 | 0 |
| tr G5E9U5 G5E9U5_HUMAN       | 16 kDa  | 2 | 0 | 0 | 0 |
| tr H0Y8W2 H0Y8W2_HUMAN (+1)  | 30 kDa  | 2 | 0 | 0 | 0 |
| tr H0YDU8 H0YDU8_HUMAN       | 55 kDa  | 3 | 0 | 0 | 0 |
| tr D6R9P4 D6R9P4_HUMAN (+1)  | 31 kDa  | 3 | 0 | 0 | 0 |
| tr E1P660 E1P660_HUMAN       | 53 kDa  | 2 | 0 | 0 | 0 |
| tr C9J2G0 C9J2G0_HUMAN (+1)  | 17 kDa  | 2 | 0 | 0 | 0 |
| tr E5RIJ0 E5RIJ0_HUMAN (+2)  | 22 kDa  | 0 | 0 | 2 | 0 |
| tr H0Y764 H0Y764_HUMAN       | 224 kDa | 2 | 0 | 0 | 0 |
| tr B3KVR1 B3KVR1_HUMAN       | 25 kDa  | 0 | 0 | 0 | 2 |
| tr H0YDN1 H0YDN1_HUMAN       | 24 kDa  | 0 | 0 | 2 | 0 |
| tr A8MT37 A8MT37_HUMAN       | 45 kDa  | 2 | 0 | 0 | 0 |
| tr E9PB39 E9PB39_HUMAN (+1)  | 68 kDa  | 2 | 0 | 0 | 0 |
| tr E5RGJ8 E5RGJ8_HUMAN (+2)  | 11 kDa  | 0 | 0 | 2 | 0 |
| REVtr H7BY84 H7BY84_HUMAN    | 58 kDa  | 0 | 0 | 2 | 0 |
| tr H0YBC2 H0YBC2_HUMAN       | 22 kDa  | 3 | 0 | 0 | 0 |
| tr C9J7I2 C9J7I2_HUMAN (+4)  | 93 kDa  | 2 | 0 | 0 | 0 |
| tr E7EPD0 E7EPD0_HUMAN       | 50 kDa  | 2 | 0 | 0 | 0 |
| tr A8MV29 A8MV29_HUMAN (+4)  | 47 kDa  | 2 | 0 | 0 | 0 |
| tr F8W651 F8W651_HUMAN       | 13 kDa  | 2 | 0 | 0 | 0 |
| tr H0YLE5 H0YLE5_HUMAN       | 22 kDa  | 0 | 0 | 2 | 0 |
| tr E9PL17 E9PL17_HUMAN       | 49 kDa  | 2 | 0 | 0 | 0 |
| tr H3BUM9 H3BUM9_HUMAN       | 12 kDa  | 2 | 0 | 0 | 0 |
| tr F8W0V1 F8W0V1_HUMAN       | 18 kDa  | 2 | 0 | 0 | 0 |

Identified Proteins (942)

|                                                                                                                                           | Accession Number                | Molecular W | GST-GppNHp | Galpha2-GDF | Galpha2-Gpp |
|-------------------------------------------------------------------------------------------------------------------------------------------|---------------------------------|-------------|------------|-------------|-------------|
| GST-part                                                                                                                                  | GST                             | 26 kDa      | 3541       | 7825        | 7272        |
| Guanine nucleotide binding protein (G protein), alpha inhibiting activity polypeptide 2, isoform CRA_c OS=Homo sapiens GN=GNAI2 PE=2 SV=1 | tr B4E2X5 B4E2X5_HUMAN          | 35 kDa      | 93         | 6017        | 5941        |
| Ras-related C3 botulinum toxin substrate 2 (Fragment) OS=Homo sapiens GN=RAC2 PE=3 SV=1                                                   | tr B1AH78 B1AH78_HUMAN          | 19 kDa      | 24         | 52          | 85          |
| Guanine nucleotide-binding protein G(t) subunit alpha-3 OS=Homo sapiens GN=GNA13 PE=2 SV=2                                                | sp A8MTJ3 GNAT3_HUMAN           | 40 kDa      | 0          | 454         | 633         |
| Trypsin precursor                                                                                                                         | gi 136429 sp P00761 TRYP_PIG    | 24 kDa      | 576        | 310         | 337         |
| Glutathione S-transferase P OS=Homo sapiens GN=GSTP1 PE=3 SV=1                                                                            | tr A8MX94 A8MX94_HUMAN          | 19 kDa      | 443        | 531         | 513         |
| POTE ankyrin domain family member F OS=Homo sapiens GN=POTEF PE=1 SV=2                                                                    | sp A5A3E0 POTEF_HUMAN           | 121 kDa     | 414        | 319         | 218         |
| Coronin OS=Homo sapiens GN=CORO1A PE=3 SV=1                                                                                               | tr H3BRY3 H3BRY3_HUMAN          | 43 kDa      | 312        | 101         | 111         |
| Ras GTPase-activating protein 3 OS=Homo sapiens GN=RASA3 PE=2 SV=1                                                                        | tr F8W6X8 F8W6X8_HUMAN          | 92 kDa      | 3          | 230         | 416         |
| Actin, alpha skeletal muscle OS=Homo sapiens GN=ACTA1 PE=3 SV=2                                                                           | tr A6NL76 A6NL76_HUMAN          | 32 kDa      | 175        | 101         | 97          |
| Glutathione S-transferase Mu 1 OS=Homo sapiens GN=GSTM1 PE=4 SV=1                                                                         | tr B9ZVX7 B9ZVX7_HUMAN          | 17 kDa      | 72         | 175         | 171         |
| Ankyrin repeat and BTB/POZ domain-containing protein BTBD11 OS=Homo sapiens GN=BTBD11 PE=2 SV=3                                           | sp A6QL63 BTBD11_HUMAN          | 121 kDa     | 0          | 284         | 209         |
| Serum albumin OS=Homo sapiens GN=ALB PE=4 SV=1                                                                                            | tr D6RHD5 D6RHD5_HUMAN (+1)     | 52 kDa      | 36         | 178         | 149         |
| Heat shock cognate 71 kDa protein OS=Homo sapiens GN=HSPA8 PE=3 SV=1                                                                      | tr E9PKE3 E9PKE3_HUMAN          | 69 kDa      | 149        | 83          | 85          |
| RAP1, GTP-GDP dissociation stimulator 1, isoform CRA_b OS=Homo sapiens GN=RAP1GDS1 PE=4 SV=1                                              | tr G5E9P9 G5E9P9_HUMAN          | 66 kDa      | 0          | 0           | 0           |
| Tubulin beta chain OS=Homo sapiens GN=TUBB PE=3 SV=1                                                                                      | tr F8VYX6 F8VYX6_HUMAN          | 48 kDa      | 69         | 162         | 190         |
| Ras-related C3 botulinum toxin substrate 2 OS=Homo sapiens GN=RAC2 PE=3 SV=1                                                              | tr B1AH80 B1AH80_HUMAN          | 21 kDa      | 0          | 5           | 0           |
| Filamin-A OS=Homo sapiens GN=FLNA PE=4 SV=2                                                                                               | tr E9PHF0 E9PHF0_HUMAN          | 83 kDa      | 126        | 115         | 87          |
| Guanylate kinase (Fragment) OS=Homo sapiens GN=GUK1 PE=4 SV=1                                                                             | tr B1ANH2 B1ANH2_HUMAN          | 28 kDa      | 0          | 0           | 11          |
| Ras GTPase-activating-like protein IQGAP1 OS=Homo sapiens GN=IQGAP1 PE=4 SV=1                                                             | tr H0YLE8 H0YLE8_HUMAN          | 125 kDa     | 53         | 61          | 60          |
| Tubulin alpha-4A chain OS=Homo sapiens GN=TUBA4A PE=2 SV=1                                                                                | tr A8MUB1 A8MUB1_HUMAN          | 48 kDa      | 55         | 136         | 147         |
| Actinin alpha 1 isoform 3 OS=Homo sapiens GN=ACTN1 PE=2 SV=1                                                                              | tr B7TY16 B7TY16_HUMAN          | 107 kDa     | 141        | 74          | 74          |
| Carbonyl reductase 1, isoform CRA_c OS=Homo sapiens GN=CBR1 PE=2 SV=1                                                                     | tr B4DFK7 B4DFK7_HUMAN          | 19 kDa      | 107        | 86          | 71          |
| Actin, cytoplasmic 1 (Fragment) OS=Homo sapiens GN=ACTB PE=3 SV=1                                                                         | tr E7EVS6 E7EVS6_HUMAN          | 18 kDa      | 132        | 67          | 73          |
| 14-3-3 protein zeta/delta (Fragment) OS=Homo sapiens GN=YWHAZ PE=3 SV=1                                                                   | tr E7EX29 E7EX29_HUMAN          | 28 kDa      | 18         | 116         | 170         |
| Actin-related protein 2 OS=Homo sapiens GN=ACTR2 PE=3 SV=1                                                                                | tr E9PF41 E9PF41_HUMAN          | 45 kDa      | 88         | 44          | 37          |
| Filamin-A (Fragment) OS=Homo sapiens GN=FLNA PE=4 SV=2                                                                                    | tr F8WE98 F8WE98_HUMAN          | 67 kDa      | 83         | 79          | 58          |
| Glyceraldehyde-3-phosphate dehydrogenase OS=Homo sapiens GN=GAPDH PE=3 SV=1                                                               | tr E7EUT4 E7EUT4_HUMAN          | 32 kDa      | 10         | 73          | 164         |
| Ras-related protein Rap-1b (Fragment) OS=Homo sapiens GN=RAP1B PE=4 SV=1                                                                  | tr E7ESV4 E7ESV4_HUMAN (+1)     | 18 kDa      | 5          | 120         | 106         |
| C4b-B OS=Homo sapiens GN=C4B PE=4 SV=1                                                                                                    | tr F8VNV9 F8VNV9_HUMAN          | 188 kDa     | 31         | 53          | 43          |
| Spectrin alpha chain, non-erythrocytic 1 OS=Homo sapiens GN=SPTAN1 PE=4 SV=2                                                              | tr A6NG51 A6NG51_HUMAN          | 285 kDa     | 46         | 79          | 38          |
| Cofilin-1 OS=Homo sapiens GN=CFL1 PE=4 SV=1                                                                                               | tr E9PK25 E9PK25_HUMAN          | 23 kDa      | 72         | 70          | 66          |
| Rho-related GTP-binding protein RhoC (Fragment) OS=Homo sapiens GN=RHO C PE=3 SV=1                                                        | tr E9PN11 E9PN11_HUMAN          | 25 kDa      | 4          | 31          | 154         |
| Keratin, type II cytoskeletal 5 (Fragment) OS=Homo sapiens GN=KRT5 PE=4 SV=1                                                              | tr F8W0C6 F8W0C6_HUMAN          | 21 kDa      | 42         | 2           | 19          |
| Disks large homolog 1 OS=Homo sapiens GN=DLG1 PE=4 SV=1                                                                                   | tr E7EWL7 E7EWL7_HUMAN          | 88 kDa      | 0          | 0           | 0           |
| Obscurin OS=Homo sapiens GN=OBSCN PE=4 SV=1                                                                                               | REVT H3BPX2 H3BPX2_HUMAN        | 946 kDa     | 1          | 0           | 0           |
| HEAT repeat-containing protein 5A OS=Homo sapiens GN=HEATR5A PE=4 SV=1                                                                    | tr F5H619 F5H619_HUMAN          | 223 kDa     | 2          | 2           | 0           |
| Pyruvate kinase (Fragment) OS=Homo sapiens GN=PKM PE=3 SV=1                                                                               | tr H3BTN5 H3BTN5_HUMAN          | 53 kDa      | 88         | 8           | 11          |
| Synaptic vesicle membrane protein VAT-1 homolog OS=Homo sapiens GN=VAT1 PE=2 SV=1                                                         | tr B4DPX4 B4DPX4_HUMAN          | 35 kDa      | 12         | 75          | 68          |
| Actin, gamma-enteric smooth muscle OS=Homo sapiens GN=ACTG2 PE=3 SV=1                                                                     | tr E9PG30 E9PG30_HUMAN          | 37 kDa      | 3          | 0           | 2           |
| Prohibitin OS=Homo sapiens GN=PHB PE=2 SV=1                                                                                               | tr B4DY47 B4DY47_HUMAN          | 17 kDa      | 0          | 0           | 0           |
| Fructose-bisphosphate aldolase OS=Homo sapiens GN=ALDOA PE=3 SV=1                                                                         | tr H3BQN4 H3BQN4_HUMAN          | 39 kDa      | 51         | 28          | 28          |
| Nesprin-1 OS=Homo sapiens GN=SYNE1 PE=4 SV=1                                                                                              | tr E9PEL9 E9PEL9_HUMAN          | 1005 kDa    | 2          | 0           | 0           |
| Isoform 3 of Laminin subunit beta-4 OS=Homo sapiens GN=LAMB4                                                                              | REVsp A4D0S4-3 LAMB4_HUMAN (+1) | 189 kDa     | 0          | 0           | 3           |
| Myosin-10 OS=Homo sapiens GN=MYH10 PE=4 SV=1                                                                                              | tr F8VTL3 F8VTL3_HUMAN (+1)     | 233 kDa     | 50         | 18          | 17          |
| Tropomyosin alpha-3 chain OS=Homo sapiens GN=TPM3 PE=4 SV=1                                                                               | tr D6R904 D6R904_HUMAN          | 11 kDa      | 59         | 38          | 30          |
| DNA damage-binding protein 1 OS=Homo sapiens GN=DDB1 PE=4 SV=1                                                                            | tr F5GY55 F5GY55_HUMAN          | 122 kDa     | 19         | 23          | 28          |
| Ras GTPase-activating-like protein IQGAP2 (Fragment) OS=Homo sapiens GN=IQGAP2 PE=4 SV=1                                                  | tr E7EWC2 E7EWC2_HUMAN          | 160 kDa     | 4          | 2           | 3           |
| Collagen alpha-3(VI) chain OS=Homo sapiens GN=COL6A3 PE=4 SV=1                                                                            | REVT E7ENL6 E7ENL6_HUMAN        | 322 kDa     | 5          | 0           | 0           |
| ATP-binding cassette sub-family A member 2 OS=Homo sapiens GN=ABCA2 PE=3 SV=1                                                             | tr E7EU84 E7EU84_HUMAN          | 223 kDa     | 4          | 0           | 0           |
| Keratin, type II cytoskeletal 5 (Fragment) OS=Homo sapiens GN=KRT5 PE=3 SV=1                                                              | tr H0YI76 H0YI76_HUMAN          | 23 kDa      | 41         | 11          | 18          |
| Probable ATP-dependent RNA helicase DDX17 OS=Homo sapiens GN=DDX17 PE=3 SV=1                                                              | tr H3BLZ8 H3BLZ8_HUMAN          | 80 kDa      | 42         | 16          | 18          |
| Talin-2 (Fragment) OS=Homo sapiens GN=TLN2 PE=4 SV=1                                                                                      | tr H0YMT1 H0YMT1_HUMAN          | 155 kDa     | 29         | 20          | 24          |
| Heat shock 70 kDa protein 1A/1B OS=Homo sapiens GN=HSPA1B PE=3 SV=1                                                                       | tr F8VZJ4 F8VZJ4_HUMAN          | 68 kDa      | 32         | 13          | 9           |

|                                                                                                                    |                                 |         |    |    |    |
|--------------------------------------------------------------------------------------------------------------------|---------------------------------|---------|----|----|----|
| Keratin, type II cytoskeletal 1b OS=Homo sapiens GN=KRT77 PE=3 SV=1                                                | tr F5GY66 F5GY66_HUMAN          | 38 kDa  | 4  | 0  | 0  |
| Capping protein (Actin filament) muscle Z-line, beta OS=Homo sapiens GN=CAPZB PE=4 SV=1                            | tr B1AK87 B1AK87_HUMAN (+1)     | 29 kDa  | 15 | 30 | 30 |
| Plastin-3 OS=Homo sapiens GN=PLS3 PE=2 SV=1                                                                        | tr B4DGB4 B4DGB4_HUMAN (+2)     | 69 kDa  | 67 | 11 | 4  |
| Myosin-14 OS=Homo sapiens GN=MYH14 PE=4 SV=1                                                                       | tr G8JLL9 G8JLL9_HUMAN          | 232 kDa | 46 | 17 | 20 |
| Tubulin alpha-1C chain OS=Homo sapiens GN=TUBA1C PE=3 SV=1                                                         | tr F5H5D3 F5H5D3_HUMAN          | 58 kDa  | 22 | 39 | 56 |
| Actin-related protein 3 OS=Homo sapiens GN=ACTR3 PE=2 SV=1                                                         | tr B4DXW1 B4DXW1_HUMAN          | 42 kDa  | 45 | 12 | 13 |
| Peptidyl-prolyl cis-trans isomerase OS=Homo sapiens GN=PPIA PE=3 SV=1                                              | tr C9J5S7 C9J5S7_HUMAN (+1)     | 13 kDa  | 42 | 35 | 27 |
| Long-chain-fatty-acid--CoA ligase 4 (Fragment) OS=Homo sapiens GN=ACSL4 PE=4 SV=1                                  | tr HOY9A0 HOY9A0_HUMAN          | 17 kDa  | 0  | 57 | 43 |
| Coiled-coil domain-containing protein 88B OS=Homo sapiens GN=CCDC88B PE=1 SV=1                                     | sp A6NC98 CC88B_HUMAN           | 165 kDa | 0  | 0  | 2  |
| Gelsolin OS=Homo sapiens GN=GSN PE=4 SV=1                                                                          | tr F5H1A8 F5H1A8_HUMAN          | 81 kDa  | 41 | 12 | 16 |
| Microtubule-actin cross-linking factor 1, isoforms 1/2/3/5 OS=Homo sapiens GN=MACF1 PE=4 SV=1                      | tr H3BQK9 H3BQK9_HUMAN          | 861 kDa | 2  | 0  | 2  |
| Junction plakoglobin OS=Homo sapiens GN=JUP PE=3 SV=1                                                              | tr F5GWP8 F5GWP8_HUMAN          | 66 kDa  | 26 | 0  | 9  |
| Ezrin OS=Homo sapiens GN=EZR PE=4 SV=2                                                                             | tr E7EQR4 E7EQR4_HUMAN          | 66 kDa  | 40 | 18 | 10 |
| Transketolase OS=Homo sapiens GN=TKT PE=4 SV=1                                                                     | tr E7EPA7 E7EPA7_HUMAN          | 69 kDa  | 38 | 13 | 11 |
| Protein FAM65B OS=Homo sapiens GN=FAM65B PE=4 SV=1                                                                 | tr F5GX51 F5GX51_HUMAN          | 116 kDa | 0  | 5  | 59 |
| Annexin (Fragment) OS=Homo sapiens GN=ANXA2 PE=3 SV=1                                                              | tr HOYMD0 HOYMD0_HUMAN (+2)     | 25 kDa  | 38 | 27 | 26 |
| Actin-related protein 2/3 complex subunit 4 OS=Homo sapiens GN=ARPC4 PE=4 SV=1                                     | tr F8WCF6 F8WCF6_HUMAN          | 21 kDa  | 32 | 24 | 20 |
| LanC-like protein 1 (Fragment) OS=Homo sapiens GN=LANCL1 PE=4 SV=1                                                 | tr E9PH50 E9PH50_HUMAN          | 22 kDa  | 21 | 6  | 8  |
| Phosphoglycerate kinase OS=Homo sapiens GN=PGK1 PE=2 SV=1                                                          | tr B7Z7A9 B7Z7A9_HUMAN          | 41 kDa  | 37 | 24 | 18 |
| RAS p21 protein activator 2, isoform CRA_b OS=Homo sapiens GN=RASA2 PE=4 SV=1                                      | tr G3V0F9 G3V0F9_HUMAN          | 97 kDa  | 0  | 12 | 72 |
| Long-chain-fatty-acid--CoA ligase 1 OS=Homo sapiens GN=ACSL1 PE=4 SV=1                                             | tr E7EPM6 E7EPM6_HUMAN          | 74 kDa  | 0  | 41 | 35 |
| Collagen alpha-6(IV) chain OS=Homo sapiens GN=COL4A6 PE=4 SV=1                                                     | REVtr A8MXH5 A8MXH5_HUMAN       | 165 kDa | 0  | 2  | 2  |
| Inter-alpha-trypsin inhibitor heavy chain H3 OS=Homo sapiens GN=ITIH3 PE=4 SV=1                                    | tr E7ET33 E7ET33_HUMAN          | 78 kDa  | 0  | 0  | 2  |
| Vimentin OS=Homo sapiens GN=VIM PE=3 SV=1                                                                          | tr BOYJC4 BOYJC4_HUMAN          | 50 kDa  | 13 | 15 | 25 |
| Synembryn-A (Fragment) OS=Homo sapiens GN=RIC8A PE=4 SV=1                                                          | tr HOYENO HOYENO_HUMAN          | 32 kDa  | 0  | 26 | 26 |
| T-complex protein 1 subunit gamma OS=Homo sapiens GN=CCT3 PE=2 SV=1                                                | tr B4DUR8 B4DUR8_HUMAN          | 56 kDa  | 17 | 2  | 2  |
| LIM and SH3 domain protein 1 (Fragment) OS=Homo sapiens GN=LASP1 PE=4 SV=1                                         | tr C9J9W2 C9J9W2_HUMAN          | 19 kDa  | 31 | 16 | 14 |
| Dynein heavy chain 8, axonemal OS=Homo sapiens GN=DNAH8 PE=4 SV=1                                                  | REVtr HOY7V4 HOY7V4_HUMAN       | 479 kDa | 2  | 2  | 0  |
| Structural maintenance of chromosomes protein 1A OS=Homo sapiens GN=SMC1A PE=4 SV=1                                | tr G8JLG1 G8JLG1_HUMAN          | 59 kDa  | 19 | 15 | 10 |
| Fermitin family homolog 3 (Fragment) OS=Homo sapiens GN=FERMT3 PE=4 SV=1                                           | tr F5H1C6 F5H1C6_HUMAN          | 33 kDa  | 35 | 17 | 12 |
| Heterogeneous nuclear ribonucleoprotein A1 OS=Homo sapiens GN=HNRNPA1 PE=4 SV=1                                    | tr F8VXY0 F8VXY0_HUMAN          | 33 kDa  | 17 | 20 | 14 |
| Ras-related protein Rab-8A OS=Homo sapiens GN=RAB8A PE=2 SV=1                                                      | tr B4DEK7 B4DEK7_HUMAN          | 24 kDa  | 0  | 29 | 39 |
| Extracellular signal-regulated kinase-2 splice variant OS=Homo sapiens GN=MAPK1 PE=2 SV=1                          | tr A8CZ64 A8CZ64_HUMAN          | 36 kDa  | 18 | 17 | 11 |
| Isoform 2 of Collagen alpha-5(VI) chain OS=Homo sapiens GN=COL6A5                                                  | REVsp A8TX70-2 CO6A5_HUMAN (+3) | 280 kDa | 2  | 0  | 0  |
| Putative Polycomb group protein ASXL2 OS=Homo sapiens GN=ASXL2 PE=4 SV=1                                           | REVtr E7EWD6 E7EWD6_HUMAN       | 150 kDa | 0  | 0  | 2  |
| CUB and sushi domain-containing protein 1 OS=Homo sapiens GN=CSMD1 PE=4 SV=1                                       | tr ESRIG2 ESRIG2_HUMAN (+1)     | 389 kDa | 0  | 8  | 0  |
| L-lactate dehydrogenase (Fragment) OS=Homo sapiens GN=LDHB PE=3 SV=1                                               | tr A8MW50 A8MW50_HUMAN          | 25 kDa  | 26 | 8  | 9  |
| Dedicator of cytokinesis protein 2 OS=Homo sapiens GN=DOCK2 PE=4 SV=1                                              | tr E7ERW7 E7ERW7_HUMAN          | 153 kDa | 0  | 16 | 14 |
| SAM domain and HD domain-containing protein 1 OS=Homo sapiens GN=SAMHD1 PE=2 SV=2                                  | tr A6NDZ3 A6NDZ3_HUMAN          | 20 kDa  | 0  | 5  | 0  |
| Uncharacterized protein OS=Homo sapiens GN=VCL PE=2 SV=1                                                           | tr B4DTM7 B4DTM7_HUMAN          | 36 kDa  | 24 | 10 | 12 |
| DOCK10.2 OS=Homo sapiens GN=DOCK10.2 PE=2 SV=2                                                                     | tr B3FL70 B3FL70_HUMAN          | 249 kDa | 2  | 0  | 2  |
| Cell division control protein 42 homolog OS=Homo sapiens GN=CDC42 PE=3 SV=1                                        | tr E7ETU3 E7ETU3_HUMAN          | 27 kDa  | 3  | 18 | 14 |
| Caldesmon OS=Homo sapiens GN=CALD1 PE=4 SV=1                                                                       | tr E7EX44 E7EX44_HUMAN (+1)     | 64 kDa  | 18 | 19 | 5  |
| Mucin-19 (Fragment) OS=Homo sapiens GN=MUC19 PE=4 SV=1                                                             | tr C9JCE7 C9JCE7_HUMAN          | 175 kDa | 0  | 2  | 0  |
| T-complex protein 1 subunit zeta OS=Homo sapiens GN=CCT6A PE=2 SV=1                                                | tr B4DPJ8 B4DPJ8_HUMAN          | 55 kDa  | 6  | 0  | 0  |
| Elongation factor 1-gamma OS=Homo sapiens GN=EEF1G PE=2 SV=1                                                       | tr B4DTG2 B4DTG2_HUMAN          | 56 kDa  | 26 | 8  | 6  |
| Tumor necrosis factor alpha-induced protein 8 OS=Homo sapiens GN=TNFAIP8 PE=4 SV=1                                 | tr D6RCM8 D6RCM8_HUMAN          | 23 kDa  | 0  | 5  | 60 |
| Heat shock protein HSP 90-alpha (Fragment) OS=Homo sapiens GN=HSP90AA1 PE=4 SV=1                                   | tr G3V2J8 G3V2J8_HUMAN          | 20 kDa  | 16 | 14 | 13 |
| Plastin-2 OS=Homo sapiens GN=LCP1 PE=2 SV=1                                                                        | tr B4DUA0 B4DUA0_HUMAN          | 22 kDa  | 33 | 5  | 6  |
| Actin-related protein 2/3 complex subunit 3 (Fragment) OS=Homo sapiens GN=ARPC3 PE=4 SV=1                          | tr C9JZD1 C9JZD1_HUMAN          | 12 kDa  | 9  | 24 | 12 |
| Phosphorylase OS=Homo sapiens GN=PYGL PE=3 SV=1                                                                    | tr E9PK47 E9PK47_HUMAN          | 94 kDa  | 8  | 12 | 18 |
| WD repeat-containing protein 1 (Fragment) OS=Homo sapiens GN=WDR1 PE=4 SV=1                                        | tr D6RD66 D6RD66_HUMAN          | 27 kDa  | 41 | 4  | 0  |
| Cytoplasmic FMR1-interacting protein 2 OS=Homo sapiens GN=CYFIP2 PE=4 SV=1                                         | tr E7EVF4 E7EVF4_HUMAN (+1)     | 146 kDa | 13 | 7  | 9  |
| Amyotrophic lateral sclerosis 2 chromosomal region candidate gene 11 protein OS=Homo sapiens GN=ALS2CR11 PE=4 SV=1 | REVtr E9PGG4 E9PGG4_HUMAN       | 209 kDa | 0  | 0  | 2  |
| Spectrin alpha chain, non-erythrocytic 1 OS=Homo sapiens GN=SPTAN1 PE=4 SV=2                                       | REVtr A6NGS1 A6NGS1_HUMAN       | 285 kDa | 3  | 0  | 3  |

|                                                                                                         |                             |          |    |    |    |
|---------------------------------------------------------------------------------------------------------|-----------------------------|----------|----|----|----|
| Mucin-16 OS=Homo sapiens GN=MUC16 PE=4 SV=2                                                             | tr B5ME49 B5ME49_HUMAN      | 1519 kDa | 2  | 0  | 0  |
| Interferon alpha/beta receptor 2 (Fragment) OS=Homo sapiens GN=IFNAR2 PE=4 SV=1                         | REvtr C9JCU0 C9JCU0_HUMAN   | 26 kDa   | 0  | 14 | 0  |
| Eukaryotic translation initiation factor 4B OS=Homo sapiens GN=EIF4B PE=4 SV=1                          | tr E7EX17 E7EX17_HUMAN      | 70 kDa   | 7  | 3  | 0  |
| Rho GTPase-activating protein 1 (Fragment) OS=Homo sapiens GN=ARHGAP1 PE=4 SV=1                         | tr H0YE29 H0YE29_HUMAN      | 38 kDa   | 0  | 10 | 37 |
| Protein phosphatase 1 regulatory subunit 12A (Fragment) OS=Homo sapiens GN=PPP1R12A PE=4 SV=1           | tr F8VZN8 F8VZN8_HUMAN      | 77 kDa   | 13 | 6  | 6  |
| Long-chain-fatty-acid-CoA ligase 4 (Fragment) OS=Homo sapiens GN=ACSL4 PE=4 SV=1                        | tr D6RF95 D6RF95_HUMAN      | 17 kDa   | 0  | 19 | 22 |
| Choline-phosphate cytidylyltransferase A OS=Homo sapiens GN=PCYT1A PE=4 SV=1                            | tr C9JEJ2 C9JEJ2_HUMAN      | 43 kDa   | 0  | 20 | 21 |
| Nesprin-2 OS=Homo sapiens GN=SYNE2 PE=4 SV=1                                                            | tr G3V5X4 G3V5X4_HUMAN      | 788 kDa  | 3  | 0  | 0  |
| Leukotriene A-4 hydrolase OS=Homo sapiens GN=LTA4H PE=4 SV=1                                            | tr F8VV40 F8VV40_HUMAN      | 67 kDa   | 21 | 2  | 0  |
| Coatomer protein complex, subunit beta 2 (Beta prime), isoform CRA_b OS=Homo sapiens GN=COPB2 PE=2 SV=1 | tr B4DZ18 B4DZ18_HUMAN      | 99 kDa   | 9  | 7  | 16 |
| Actin-related protein 2/3 complex subunit 1B OS=Homo sapiens GN=ARPC1B PE=4 SV=1                        | tr F8WCG3 F8WCG3_HUMAN      | 25 kDa   | 15 | 6  | 4  |
| MLL cleavage product C180 OS=Homo sapiens GN=MLL PE=4 SV=1                                              | REvtr E9PQG7 E9PQG7_HUMAN   | 432 kDa  | 4  | 0  | 0  |
| Histone-lysine N-methyltransferase MLL3 (Fragment) OS=Homo sapiens GN=MLL3 PE=4 SV=1                    | REvtr H7BY37 H7BY37_HUMAN   | 270 kDa  | 0  | 2  | 0  |
| Keratin, type II cytoskeletal 5 (Fragment) OS=Homo sapiens GN=KRT5 PE=4 SV=1                            | tr F8VV57 F8VV57_HUMAN      | 12 kDa   | 24 | 2  | 5  |
| 6-phosphogluconate dehydrogenase, decarboxylating OS=Homo sapiens GN=PGD PE=2 SV=1                      | tr B4DQJ8 B4DQJ8_HUMAN      | 52 kDa   | 17 | 11 | 8  |
| Ras-related protein Rab-7a (Fragment) OS=Homo sapiens GN=RAB7A PE=3 SV=1                                | tr C9J592 C9J592_HUMAN      | 17 kDa   | 0  | 23 | 29 |
| ATP-dependent RNA helicase DDX3Y OS=Homo sapiens GN=DDX3Y PE=2 SV=1                                     | tr B4DXX7 B4DXX7_HUMAN      | 73 kDa   | 12 | 12 | 13 |
| LIM domain only protein 7 OS=Homo sapiens GN=LMO7 PE=4 SV=1                                             | tr F8WD26 F8WD26_HUMAN      | 185 kDa  | 0  | 0  | 2  |
| Ras-related protein Rab-11A OS=Homo sapiens GN=RAB11A PE=3 SV=1                                         | tr H3B5C1 H3B5C1_HUMAN      | 22 kDa   | 0  | 12 | 28 |
| Serine/threonine-protein phosphatase OS=Homo sapiens GN=PPP1CA PE=3 SV=1                                | tr A6NNR3 A6NNR3_HUMAN      | 33 kDa   | 15 | 6  | 9  |
| LVV-hemorphin-7 (Fragment) OS=Homo sapiens GN=HBB PE=3 SV=1                                             | tr F8W6P5 F8W6P5_HUMAN      | 10 kDa   | 12 | 10 | 13 |
| Pro-interleukin-16 (Fragment) OS=Homo sapiens GN=IL16 PE=4 SV=1                                         | tr H3BVH5 H3BVH5_HUMAN      | 130 kDa  | 17 | 11 | 7  |
| Nucleoporin p58/p45 OS=Homo sapiens GN=NUPL1 PE=4 SV=1                                                  | REvtr A6N112 A6N112_HUMAN   | 60 kDa   | 0  | 2  | 0  |
| Ankyrin repeat and SAM domain-containing protein 1A OS=Homo sapiens GN=ANKS1A PE=2 SV=1                 | tr B4DQW8 B4DQW8_HUMAN      | 34 kDa   | 2  | 6  | 2  |
| SPOC domain-containing protein 1 OS=Homo sapiens GN=SPOCD1 PE=4 SV=1                                    | tr E9PPM7 E9PPM7_HUMAN      | 71 kDa   | 0  | 0  | 0  |
| Citron Rho-interacting kinase (Fragment) OS=Homo sapiens GN=CIT PE=4 SV=1                               | tr H7BY13 H7BY13_HUMAN      | 187 kDa  | 0  | 0  | 0  |
| Non-POU domain-containing octamer-binding protein OS=Homo sapiens GN=NONO PE=4 SV=1                     | tr F5GYZ3 F5GYZ3_HUMAN      | 44 kDa   | 12 | 0  | 0  |
| Ras-related protein Rab-1A OS=Homo sapiens GN=RAB1A PE=3 SV=1                                           | tr E7END7 E7END7_HUMAN      | 19 kDa   | 0  | 13 | 30 |
| Elongation factor 1-alpha 1 (Fragment) OS=Homo sapiens GN=EEF1A1 PE=4 SV=1                              | tr A6PW80 A6PW80_HUMAN      | 12 kDa   | 8  | 9  | 9  |
| ATP-citrate synthase OS=Homo sapiens GN=ACLY PE=2 SV=1                                                  | tr B4E3P0 B4E3P0_HUMAN      | 91 kDa   | 11 | 12 | 12 |
| Signal peptide, CUB and EGF-like domain-containing protein 2 OS=Homo sapiens GN=SCUBE2 PE=4 SV=1        | REvtr E7EQD6 E7EQD6_HUMAN   | 113 kDa  | 0  | 5  | 0  |
| Nebulin OS=Homo sapiens GN=NEB PE=4 SV=1                                                                | REvtr F8WCPO F8WCPO_HUMAN   | 987 kDa  | 0  | 2  | 0  |
| Enolase (Fragment) OS=Homo sapiens GN=ENO3 PE=3 SV=1                                                    | tr E5RGZ4 E5RGZ4_HUMAN      | 30 kDa   | 20 | 8  | 9  |
| Dynein heavy chain 8, axonemal OS=Homo sapiens GN=DNAH8 PE=4 SV=1                                       | tr H0Y7V4 H0Y7V4_HUMAN      | 479 kDa  | 0  | 2  | 0  |
| Keratin, type II cytoskeletal 4 OS=Homo sapiens GN=KRT4 PE=3 SV=1                                       | tr F5H8K9 F5H8K9_HUMAN      | 54 kDa   | 3  | 0  | 0  |
| Heat shock protein HSP 90-beta (Fragment) OS=Homo sapiens GN=HSP90AB1 PE=4 SV=1                         | tr H0Y6E4 H0Y6E4_HUMAN      | 17 kDa   | 14 | 4  | 5  |
| Coronin OS=Homo sapiens GN=CORO7 PE=2 SV=1                                                              | tr B3KSY4 B3KSY4_HUMAN      | 77 kDa   | 11 | 5  | 5  |
| Dynamin-2 OS=Homo sapiens GN=DNM2 PE=3 SV=1                                                             | tr F5H4R9 F5H4R9_HUMAN      | 98 kDa   | 16 | 5  | 10 |
| Calponin-2 OS=Homo sapiens GN=CNN2 PE=2 SV=1                                                            | tr B4DDF4 B4DDF4_HUMAN      | 33 kDa   | 9  | 7  | 11 |
| Hematopoietic lineage cell-specific protein OS=Homo sapiens GN=HCLS1 PE=4 SV=1                          | tr E7EYV7 E7EYV7_HUMAN      | 50 kDa   | 16 | 7  | 6  |
| Homer protein homolog 3 OS=Homo sapiens GN=HOMER3 PE=4 SV=1                                             | tr E9PCW9 E9PCW9_HUMAN      | 36 kDa   | 0  | 21 | 21 |
| Lamin-B1 OS=Homo sapiens GN=LMNB1 PE=3 SV=1                                                             | tr E9PBF6 E9PBF6_HUMAN      | 45 kDa   | 0  | 20 | 19 |
| High mobility group protein B2 (Fragment) OS=Homo sapiens GN=HMGB2 PE=4 SV=1                            | tr D6R9A6 D6R9A6_HUMAN      | 15 kDa   | 3  | 8  | 10 |
| Eukaryotic initiation factor 4A-II OS=Homo sapiens GN=EIF4A2 PE=3 SV=1                                  | tr E7EQG2 E7EQG2_HUMAN      | 41 kDa   | 23 | 5  | 7  |
| UTP-glucose-1-phosphate uridylyltransferase OS=Homo sapiens GN=UGP2 PE=4 SV=1                           | tr E7EUC7 E7EUC7_HUMAN      | 58 kDa   | 16 | 2  | 0  |
| 14-3-3 protein theta (Fragment) OS=Homo sapiens GN=YWHAQ PE=4 SV=1                                      | tr E9PG15 E9PG15_HUMAN      | 17 kDa   | 2  | 19 | 23 |
| Serine/threonine-protein kinase MARK2 OS=Homo sapiens GN=MARK2 PE=4 SV=2                                | tr E9PC69 E9PC69_HUMAN      | 87 kDa   | 0  | 5  | 3  |
| Rho GTPase-activating protein 32 OS=Homo sapiens GN=ARHGAP32 PE=1 SV=1                                  | sp A7KAX9 RHG32_HUMAN       | 231 kDa  | 0  | 0  | 0  |
| Filamin-A (Fragment) OS=Homo sapiens GN=FLNA PE=4 SV=1                                                  | tr H0Y5F3 H0Y5F3_HUMAN      | 25 kDa   | 6  | 6  | 0  |
| Macrophage-capping protein OS=Homo sapiens GN=CAPG PE=2 SV=1                                            | tr B4DU58 B4DU58_HUMAN      | 36 kDa   | 19 | 7  | 9  |
| Dynamin-1-like protein OS=Homo sapiens GN=DNM1L PE=3 SV=1                                               | tr G8ILD5 G8ILD5_HUMAN      | 80 kDa   | 4  | 0  | 0  |
| Scavenger receptor cysteine-rich type 1 protein M160 OS=Homo sapiens GN=CD163L1 PE=4 SV=1               | tr E7EVK4 E7EVK4_HUMAN      | 160 kDa  | 0  | 3  | 0  |
| DNA-directed RNA polymerase OS=Homo sapiens GN=POLR2B PE=3 SV=2                                         | tr C9J2Y9 C9J2Y9_HUMAN (+1) | 133 kDa  | 0  | 3  | 4  |
| Diaphanous homolog 1 (Drosophila), isoform CRA_a OS=Homo sapiens GN=DIAPH1 PE=4 SV=1                    | tr B9ZVX0 B9ZVX0_HUMAN (+3) | 139 kDa  | 3  | 0  | 14 |
| Transaldolase OS=Homo sapiens GN=TALDO1 PE=3 SV=1                                                       | tr F2Z393 F2Z393_HUMAN      | 35 kDa   | 7  | 4  | 3  |

|                                                                                                                        |                             |         |    |    |    |
|------------------------------------------------------------------------------------------------------------------------|-----------------------------|---------|----|----|----|
| E3 ubiquitin-protein ligase TRIM33 (Fragment) OS=Homo sapiens GN=TRIM33 PE=4 SV=1                                      | tr H0Y612 H0Y612_HUMAN      | 99 kDa  | 0  | 0  | 2  |
| Mastermind-like protein 3 OS=Homo sapiens GN=MAML3 PE=4 SV=1                                                           | tr E7EVW8 E7EVW8_HUMAN      | 122 kDa | 2  | 0  | 2  |
| AT rich interactive domain 1B (SWI1-like), isoform CRA_a OS=Homo sapiens GN=ARID1B PE=4 SV=1                           | tr G3XAA0 G3XAA0_HUMAN      | 237 kDa | 0  | 5  | 2  |
| Spectrin beta chain, non-erythrocytic 1 (Fragment) OS=Homo sapiens GN=SPTBN1 PE=4 SV=1                                 | tr F8W6C1 F8W6C1_HUMAN      | 81 kDa  | 2  | 12 | 3  |
| Annexin OS=Homo sapiens GN=ANXA4 PE=2 SV=1                                                                             | tr B4DDF9 B4DDF9_HUMAN      | 27 kDa  | 10 | 8  | 11 |
| Rab GDP dissociation inhibitor beta OS=Homo sapiens GN=GDI2 PE=4 SV=1                                                  | tr E7EU23 E7EU23_HUMAN      | 51 kDa  | 19 | 8  | 5  |
| Filamin-B OS=Homo sapiens GN=FLNB PE=4 SV=1                                                                            | tr E7EN95 E7EN95_HUMAN      | 256 kDa | 4  | 2  | 0  |
| Ewing sarcoma breakpoint region 1 OS=Homo sapiens GN=EWSR1 PE=4 SV=1                                                   | tr B0QYK1 B0QYK1_HUMAN      | 63 kDa  | 4  | 7  | 2  |
| Ryanodine receptor 2 OS=Homo sapiens GN=RYP2 PE=4 SV=1                                                                 | REVtr H0YGL9 H0YGL9_HUMAN   | 563 kDa | 0  | 0  | 2  |
| Guanine nucleotide-binding protein G(i)/G(s)/G(t) subunit beta-1 OS=Homo sapiens GN=GNB1 PE=2 SV=1                     | tr B3KVK2 B3KVK2_HUMAN      | 26 kDa  | 0  | 13 | 17 |
| Exportin-2 OS=Homo sapiens GN=CSE1L PE=4 SV=1                                                                          | tr F8W904 F8W904_HUMAN      | 104 kDa | 5  | 7  | 10 |
| Protein disulfide isomerase family A, member 3, isoform CRA_b OS=Homo sapiens GN=PDIA3 PE=3 SV=1                       | tr G5EA52 G5EA52_HUMAN      | 55 kDa  | 17 | 0  | 0  |
| CLIP-associating protein 2 OS=Homo sapiens GN=CLASP2 PE=4 SV=1                                                         | tr E7EW49 E7EW49_HUMAN      | 166 kDa | 0  | 0  | 3  |
| Ras-related protein Rab-5A OS=Homo sapiens GN=RAB5A PE=2 SV=1                                                          | tr B4DJA5 B4DJA5_HUMAN      | 22 kDa  | 0  | 8  | 8  |
| G-protein-signaling modulator 3 OS=Homo sapiens GN=GPM3 PE=4 SV=1                                                      | tr E9PI3 E9PI3_HUMAN        | 18 kDa  | 0  | 8  | 8  |
| Protein RTEL1-TNFRSF6B OS=Homo sapiens GN=RTEL1 PE=4 SV=1                                                              | tr F6WH68 F6WH68_HUMAN      | 153 kDa | 0  | 0  | 0  |
| Ubiquitin-associated protein 2-like OS=Homo sapiens GN=UBAP2L PE=4 SV=1                                                | tr F8W726 F8W726_HUMAN      | 113 kDa | 0  | 0  | 0  |
| Zinc finger protein 521 OS=Homo sapiens GN=ZNF521 PE=4 SV=2                                                            | REVtr H7BYU6 H7BYU6_HUMAN   | 140 kDa | 0  | 4  | 0  |
| Heterogeneous nuclear ribonucleoprotein D0 (Fragment) OS=Homo sapiens GN=HNRNPD PE=4 SV=1                              | tr D6RAF8 D6RAF8_HUMAN      | 23 kDa  | 8  | 9  | 10 |
| Chaperonin containing TCP1, subunit 8 (Theta), isoform CRA_a OS=Homo sapiens GN=CCT8 PE=3 SV=1                         | tr G5E9B2 G5E9B2_HUMAN      | 59 kDa  | 19 | 0  | 0  |
| Beta-parvin OS=Homo sapiens GN=PARVB PE=4 SV=1                                                                         | tr B0QYM8 B0QYM8_HUMAN      | 38 kDa  | 13 | 6  | 7  |
| Tropomyosin 1 (Alpha) isoform 7 OS=Homo sapiens GN=TPM1 PE=3 SV=1                                                      | tr D9YZV8 D9YZV8_HUMAN      | 33 kDa  | 0  | 0  | 5  |
| Actin-related protein 2/3 complex subunit 2 (Fragment) OS=Homo sapiens GN=ARPC2 PE=4 SV=1                              | tr C9JTV5 C9JTV5_HUMAN (+1) | 10 kDa  | 14 | 6  | 11 |
| Exportin-7 OS=Homo sapiens GN=XPO7 PE=4 SV=1                                                                           | tr E9PEN8 E9PEN8_HUMAN      | 125 kDa | 0  | 6  | 6  |
| 6-phosphofructokinase type C OS=Homo sapiens GN=PFKP PE=2 SV=1                                                         | tr B1APP8 B1APP8_HUMAN      | 23 kDa  | 0  | 19 | 4  |
| Ena/VASP-like protein OS=Homo sapiens GN=EVL PE=2 SV=1                                                                 | tr B7Z3I5 B7Z3I5_HUMAN      | 42 kDa  | 14 | 4  | 6  |
| 26S proteasome non-ATPase regulatory subunit 2 OS=Homo sapiens GN=PSMD2 PE=4 SV=1                                      | tr E7EW34 E7EW34_HUMAN (+1) | 86 kDa  | 6  | 2  | 7  |
| Coatome subunit beta (Fragment) OS=Homo sapiens GN=COPB1 PE=4 SV=1                                                     | tr E9PP73 E9PP73_HUMAN      | 56 kDa  | 7  | 2  | 9  |
| Collagen alpha-1(III) chain OS=Homo sapiens GN=COL3A1 PE=1 SV=1                                                        | REVtr E7ENY8 E7ENY8_HUMAN   | 112 kDa | 0  | 2  | 0  |
| RNA-binding protein FUS OS=Homo sapiens GN=FUS PE=4 SV=1                                                               | tr H3BPE7 H3BPE7_HUMAN      | 53 kDa  | 2  | 0  | 0  |
| TRIO and F-actin-binding protein OS=Homo sapiens GN=TRIOBP PE=4 SV=1                                                   | tr F8W6V6 F8W6V6_HUMAN      | 74 kDa  | 9  | 6  | 0  |
| ALOX5 protein OS=Homo sapiens GN=ALOX5 PE=2 SV=1                                                                       | tr B7ZLS0 B7ZLS0_HUMAN      | 72 kDa  | 6  | 7  | 10 |
| FRAS1-related extracellular matrix protein 1 OS=Homo sapiens GN=FREM1 PE=4 SV=1                                        | REVtr C9JT55 C9JT55_HUMAN   | 244 kDa | 2  | 0  | 0  |
| Glucose-6-phosphate 1-dehydrogenase (Fragment) OS=Homo sapiens GN=G6PD PE=3 SV=1                                       | tr E7EM57 E7EM57_HUMAN (+1) | 37 kDa  | 7  | 0  | 0  |
| Guanine nucleotide-binding protein G(i)/G(s)/G(t) subunit beta-1 (Fragment) OS=Homo sapiens GN=GNB1 PE=4 SV=1          | tr F6UT28 F6UT28_HUMAN      | 18 kDa  | 0  | 14 | 17 |
| EH domain-containing protein 1 (Fragment) OS=Homo sapiens GN=EHD1 PE=4 SV=1                                            | tr C9JC03 C9JC03_HUMAN      | 43 kDa  | 18 | 0  | 0  |
| Nascent polypeptide-associated complex subunit alpha OS=Homo sapiens GN=NACA PE=4 SV=1                                 | tr E9PAV3 E9PAV3_HUMAN      | 205 kDa | 2  | 0  | 0  |
| HCG1983504, isoform CRA_f OS=Homo sapiens GN=TUBB3 PE=2 SV=1                                                           | tr A8K854 A8K854_HUMAN      | 42 kDa  | 9  | 7  | 9  |
| Annexin OS=Homo sapiens GN=ANXA6 PE=3 SV=3                                                                             | tr A6NN80 A6NN80_HUMAN      | 75 kDa  | 9  | 0  | 2  |
| Coronin OS=Homo sapiens GN=CORO1B PE=3 SV=1                                                                            | tr E7EW44 E7EW44_HUMAN (+1) | 32 kDa  | 14 | 0  | 0  |
| Coronin OS=Homo sapiens GN=CORO1C PE=2 SV=1                                                                            | tr A7MAP1 A7MAP1_HUMAN      | 59 kDa  | 10 | 0  | 0  |
| F-actin-capping protein subunit alpha-2 OS=Homo sapiens GN=CAPZA2 PE=4 SV=1                                            | tr F8W9N7 F8W9N7_HUMAN      | 20 kDa  | 7  | 6  | 6  |
| Alpha actinin 4 short isoform OS=Homo sapiens GN=ACTN4 PE=2 SV=1                                                       | tr D6PXX4 D6PXX4_HUMAN      | 80 kDa  | 15 | 2  | 4  |
| Eukaryotic translation initiation factor 4 gamma 1 OS=Homo sapiens GN=EIF4G1 PE=4 SV=1                                 | tr D3DNT2 D3DNT2_HUMAN      | 176 kDa | 0  | 5  | 6  |
| Minor histocompatibility antigen HA-1 OS=Homo sapiens GN=HMHA1 PE=4 SV=1                                               | tr F5H1R4 F5H1R4_HUMAN      | 112 kDa | 3  | 6  | 7  |
| Serine/threonine-protein phosphatase 2A 65 kDa regulatory subunit A alpha isoform OS=Homo sapiens GN=PPP2R1A PE=4 SV=1 | tr F5H3X9 F5H3X9_HUMAN      | 59 kDa  | 12 | 0  | 5  |
| 6-phosphofructokinase type C (Fragment) OS=Homo sapiens GN=PFKP PE=4 SV=1                                              | tr B1APP6 B1APP6_HUMAN      | 26 kDa  | 0  | 20 | 5  |
| ADP-ribosylation factor 5 (Fragment) OS=Homo sapiens GN=ARF5 PE=3 SV=1                                                 | tr C9J1Z8 C9J1Z8_HUMAN      | 17 kDa  | 7  | 6  | 8  |
| C-myc promoter-binding protein (Fragment) OS=Homo sapiens GN=DENND4A PE=4 SV=1                                         | REVtr H3BTW5 H3BTW5_HUMAN   | 113 kDa | 0  | 2  | 0  |
| DNA repair protein RAD51 homolog 1 OS=Homo sapiens GN=RAD51 PE=4 SV=1                                                  | REVtr E9PI54 E9PI54_HUMAN   | 11 kDa  | 0  | 2  | 0  |
| Sphingomyelin phosphodiesterase 4 OS=Homo sapiens GN=SMPD4 PE=4 SV=1                                                   | tr H7BXF4 H7BXF4_HUMAN      | 95 kDa  | 0  | 2  | 0  |
| Isoleucine--tRNA ligase, mitochondrial OS=Homo sapiens GN=IARS2 PE=3 SV=1                                              | tr F6SBX2 F6SBX2_HUMAN      | 106 kDa | 0  | 0  | 0  |
| Tripartite motif-containing protein 67 OS=Homo sapiens GN=TRIM67 PE=4 SV=1                                             | REVtr F8W8C1 F8W8C1_HUMAN   | 84 kDa  | 0  | 2  | 0  |
| C-1-tetrahydrofolate synthase, cytoplasmic OS=Homo sapiens GN=MTHFD1 PE=3 SV=1                                         | tr F5H2F4 F5H2F4_HUMAN (+1) | 111 kDa | 5  | 0  | 0  |
| V-type proton ATPase subunit B, brain isoform (Fragment) OS=Homo sapiens GN=ATP6V1B2 PE=4 SV=1                         | tr H0YC04 H0YC04_HUMAN      | 21 kDa  | 2  | 0  | 0  |

|                                                                                                                 |                                |         |    |    |    |
|-----------------------------------------------------------------------------------------------------------------|--------------------------------|---------|----|----|----|
| Nucleolin (Fragment) OS=Homo sapiens GN=NCL PE=4 SV=1                                                           | tr H7BY16 H7BY16_HUMAN         | 32 kDa  | 6  | 2  | 6  |
| T-complex protein 1 subunit eta OS=Homo sapiens GN=CCT7 PE=3 SV=1                                               | tr B8ZC9 B8ZC9_HUMAN           | 55 kDa  | 9  | 0  | 0  |
| T-complex protein 1 subunit beta OS=Homo sapiens GN=CCT2 PE=3 SV=2                                              | tr F5GW6 F5GW6_HUMAN           | 57 kDa  | 14 | 0  | 0  |
| Integrin-linked protein kinase OS=Homo sapiens GN=ILK PE=2 SV=1                                                 | tr B7Z418 B7Z418_HUMAN         | 44 kDa  | 12 | 0  | 2  |
| Heat shock 105kDa/110kDa protein 1, isoform CRA_b OS=Homo sapiens GN=HSPH1 PE=2 SV=1                            | tr B4DYH1 B4DYH1_HUMAN         | 97 kDa  | 0  | 3  | 3  |
| General vesicular transport factor p115 OS=Homo sapiens GN=USO1 PE=4 SV=1                                       | tr F5H4X1 F5H4X1_HUMAN         | 106 kDa | 0  | 4  | 8  |
| Serine/threonine-protein phosphatase 6 regulatory subunit 3 OS=Homo sapiens GN=PPP6R3 PE=4 SV=1                 | tr E9PKF6 E9PKF6_HUMAN (+1)    | 94 kDa  | 0  | 14 | 3  |
| Heterogeneous nuclear ribonucleoprotein U-like protein 1 OS=Homo sapiens GN=HNRNPUL1 PE=2 SV=1                  | tr B7Z4B8 B7Z4B8_HUMAN         | 86 kDa  | 0  | 4  | 6  |
| Kaliocin-1 (Fragment) OS=Homo sapiens GN=LTF PE=4 SV=1                                                          | tr E7EQB2 E7EQB2_HUMAN (+1)    | 77 kDa  | 5  | 5  | 2  |
| Myosin light polypeptide 6 OS=Homo sapiens GN=MYL6 PE=2 SV=1                                                    | tr B7Z6Z4 B7Z6Z4_HUMAN         | 27 kDa  | 4  | 3  | 2  |
| Serine/threonine-protein kinase MRCK beta (Fragment) OS=Homo sapiens GN=CDC42BPB PE=4 SV=1                      | tr HOYLY0 HOYLY0_HUMAN         | 75 kDa  | 2  | 0  | 0  |
| Protein transport protein Sec31A OS=Homo sapiens GN=SEC31A PE=4 SV=1                                            | tr D6REX3 D6REX3_HUMAN         | 136 kDa | 2  | 0  | 2  |
| Rho guanine nucleotide exchange factor 4 OS=Homo sapiens GN=ARHGEF4 PE=4 SV=1                                   | tr E7EV07 E7EV07_HUMAN         | 108 kDa | 0  | 0  | 2  |
| Puromycin-sensitive aminopeptidase OS=Homo sapiens GN=NPEPPS PE=4 SV=1                                          | tr E9PLK3 E9PLK3_HUMAN         | 103 kDa | 9  | 2  | 2  |
| Nucleoside diphosphate kinase A OS=Homo sapiens GN=NME1 PE=3 SV=1                                               | tr E7ERL0 E7ERL0_HUMAN         | 15 kDa  | 9  | 4  | 5  |
| Rho GTPase activating protein 25, isoform CRA_a OS=Homo sapiens GN=ARHGAP25 PE=4 SV=1                           | tr G5E9G2 G5E9G2_HUMAN         | 73 kDa  | 2  | 0  | 0  |
| Keratin, type II cytoskeletal 74 OS=Homo sapiens GN=KRT74 PE=3 SV=1                                             | tr F8W1S1 F8W1S1_HUMAN         | 59 kDa  | 2  | 0  | 3  |
| Ras GTPase-activating-like protein IQGAP1 (Fragment) OS=Homo sapiens GN=IQGAP1 PE=4 SV=1                        | tr HOYKA5 HOYKA5_HUMAN         | 5 kDa   | 0  | 3  | 2  |
| Rho-associated protein kinase 2 OS=Homo sapiens GN=ROCK2 PE=4 SV=1                                              | tr E9PF63 E9PF63_HUMAN         | 133 kDa | 4  | 3  | 7  |
| Adenosylhomocysteinase OS=Homo sapiens GN=AHCY PE=3 SV=1                                                        | tr F5H737 F5H737_HUMAN         | 45 kDa  | 11 | 3  | 4  |
| Tripartite motif-containing protein 67 OS=Homo sapiens GN=TRIM67 PE=4 SV=1                                      | tr F8W8C1 F8W8C1_HUMAN         | 84 kDa  | 0  | 2  | 2  |
| Guanine nucleotide-binding protein G(i) subunit alpha-2 OS=Homo sapiens GN=GNAI2 PE=4 SV=1                      | tr F8WE78 F8WE78_HUMAN         | 15 kDa  | 0  | 0  | 3  |
| Probable ATP-dependent RNA helicase DHX36 OS=Homo sapiens GN=DHX36 PE=4 SV=1                                    | tr F5GZS0 F5GZS0_HUMAN         | 113 kDa | 0  | 6  | 0  |
| Stress-induced-phosphoprotein 1 OS=Homo sapiens GN=STIP1 PE=4 SV=1                                              | tr G3XAD8 G3XAD8_HUMAN         | 68 kDa  | 9  | 0  | 0  |
| Glia maturation factor beta (Fragment) OS=Homo sapiens GN=GMFB PE=4 SV=1                                        | tr G3V4P8 G3V4P8_HUMAN         | 18 kDa  | 6  | 9  | 4  |
| Septin-7 OS=Homo sapiens GN=SEPT7 PE=3 SV=1                                                                     | tr E7EPK1 E7EPK1_HUMAN (+1)    | 51 kDa  | 17 | 2  | 2  |
| Archain 1, isoform CRA_a OS=Homo sapiens GN=ARCN1 PE=4 SV=1                                                     | tr B0YIW6 B0YIW6_HUMAN         | 62 kDa  | 11 | 0  | 0  |
| Ribonucleoprotein PTB-binding 1 OS=Homo sapiens GN=RAVER1 PE=4 SV=1                                             | tr E9PAU2 E9PAU2_HUMAN         | 80 kDa  | 0  | 9  | 11 |
| Mastermind-like protein 3 OS=Homo sapiens GN=MAML3 PE=4 SV=1                                                    | REVtr E7EVW8 E7EVW8_HUMAN      | 122 kDa | 0  | 0  | 0  |
| Putative high mobility group protein B1-like 1 OS=Homo sapiens GN=HMGB1P1 PE=5 SV=1                             | sp B2RPP0 HGB1A_HUMAN          | 24 kDa  | 0  | 4  | 2  |
| Dynactin subunit 1 OS=Homo sapiens GN=DCTN1 PE=4 SV=2                                                           | tr A8MY36 A8MY36_HUMAN (+3)    | 141 kDa | 4  | 3  | 6  |
| 14-3-3 protein epsilon OS=Homo sapiens GN=YWHAE PE=4 SV=1                                                       | tr B4DJF2 B4DJF2_HUMAN         | 11 kDa  | 0  | 5  | 0  |
| Ras-related protein Rap-1b-like protein OS=Homo sapiens PE=2 SV=1                                               | sp A6NI21 RP1BL_HUMAN          | 21 kDa  | 0  | 0  | 9  |
| Tyrosine-protein phosphatase non-receptor type 6 (Fragment) OS=Homo sapiens GN=PTPN6 PE=4 SV=1                  | tr F5H0N8 F5H0N8_HUMAN         | 18 kDa  | 15 | 0  | 0  |
| Eukaryotic translation initiation factor 4 gamma 2 (Fragment) OS=Homo sapiens GN=EIF4G2 PE=4 SV=1               | tr D3DQV9 D3DQV9_HUMAN         | 102 kDa | 2  | 0  | 0  |
| T-complex protein 1 subunit alpha OS=Homo sapiens GN=TCP1 PE=3 SV=1                                             | tr E7EQR6 E7EQR6_HUMAN         | 44 kDa  | 12 | 0  | 0  |
| ADAMTS-like protein 4 OS=Homo sapiens GN=ADAMTSL4 PE=4 SV=1                                                     | tr F8WAD0 F8WAD0_HUMAN         | 119 kDa | 0  | 0  | 0  |
| SH3 and multiple ankyrin repeat domains protein 3 OS=Homo sapiens GN=SHANK3 PE=4 SV=1                           | tr F2Z3L0 F2Z3L0_HUMAN         | 186 kDa | 0  | 0  | 2  |
| V-type proton ATPase catalytic subunit A OS=Homo sapiens GN=ATP6V1A PE=2 SV=1                                   | tr B7Z1R5 B7Z1R5_HUMAN         | 65 kDa  | 8  | 0  | 0  |
| Zyxin (Fragment) OS=Homo sapiens GN=ZYX PE=4 SV=1                                                               | tr HOY2Y8 HOY2Y8_HUMAN         | 58 kDa  | 3  | 5  | 4  |
| Malate dehydrogenase OS=Homo sapiens GN=MDH1 PE=3 SV=1                                                          | tr F5H098 F5H098_HUMAN         | 39 kDa  | 4  | 4  | 3  |
| SH3 domain-binding protein 1 OS=Homo sapiens GN=SH3BP1 PE=4 SV=1                                                | tr F5GZA8 F5GZA8_HUMAN         | 55 kDa  | 7  | 2  | 2  |
| Serine/threonine-protein kinase WNK2 OS=Homo sapiens GN=WNK2 PE=4 SV=1                                          | REVtr F8W9F9 F8W9F9_HUMAN (+1) | 234 kDa | 2  | 0  | 0  |
| Ugl-Y3 OS=Homo sapiens GN=FN1 PE=4 SV=1                                                                         | tr F8W7G7 F8W7G7_HUMAN (+1)    | 243 kDa | 0  | 3  | 0  |
| Far upstream element-binding protein 1 OS=Homo sapiens GN=FUBP1 PE=2 SV=1                                       | tr B4DT31 B4DT31_HUMAN (+1)    | 70 kDa  | 6  | 0  | 0  |
| Annexin OS=Homo sapiens GN=ANXA11 PE=2 SV=1                                                                     | tr B4DVE7 B4DVE7_HUMAN         | 51 kDa  | 10 | 0  | 0  |
| T-complex protein 1 subunit delta OS=Homo sapiens GN=CCT4 PE=2 SV=1                                             | tr B7Z9L0 B7Z9L0_HUMAN         | 52 kDa  | 10 | 0  | 0  |
| Rap1 GTPase-GDP dissociation stimulator 1 OS=Homo sapiens GN=RAP1GDS1 PE=4 SV=1                                 | tr E9PH06 E9PH06_HUMAN         | 57 kDa  | 0  | 0  | 0  |
| Importin subunit beta-1 OS=Homo sapiens GN=KPNB1 PE=2 SV=1                                                      | tr B7ZAV6 B7ZAV6_HUMAN (+1)    | 81 kDa  | 8  | 0  | 7  |
| Cysteine and glycine-rich protein 1 OS=Homo sapiens GN=CSRP1 PE=4 SV=1                                          | tr E9PP21 E9PP21_HUMAN         | 17 kDa  | 5  | 7  | 6  |
| CAP-Gly domain-containing linker protein 1 OS=Homo sapiens GN=CLIP1 PE=4 SV=1                                   | tr F5H0N7 F5H0N7_HUMAN         | 116 kDa | 3  | 0  | 2  |
| Cohesin subunit SA-2 OS=Homo sapiens GN=STAG2 PE=4 SV=1                                                         | tr F8WAK8 F8WAK8_HUMAN         | 134 kDa | 4  | 0  | 2  |
| Serine/threonine-protein phosphatase 6 regulatory ankyrin repeat subunit B OS=Homo sapiens GN=ANKRD44 PE=4 SV=1 | tr H7BXV4 H7BXV4_HUMAN         | 100 kDa | 0  | 0  | 2  |
| Importin-5 OS=Homo sapiens GN=IPO5 PE=2 SV=1                                                                    | tr B4E0R6 B4E0R6_HUMAN         | 109 kDa | 3  | 2  | 3  |
| Protein SCAF8 OS=Homo sapiens GN=SCAF8 PE=2 SV=1                                                                | tr B7Z888 B7Z888_HUMAN         | 147 kDa | 0  | 2  | 2  |

|                                                                                                |                             |         |    |    |    |
|------------------------------------------------------------------------------------------------|-----------------------------|---------|----|----|----|
| Polyadenylate-binding protein 1 OS=Homo sapiens GN=PABPC1 PE=4 SV=1                            | tr E7EQV3 E7EQV3_HUMAN      | 66 kDa  | 6  | 0  | 0  |
| Twinfilin-2 OS=Homo sapiens GN=TWF2 PE=4 SV=1                                                  | tr D6RG15 D6RG15_HUMAN      | 29 kDa  | 10 | 4  | 5  |
| Polyubiquitin-C (Fragment) OS=Homo sapiens GN=UBC PE=1 SV=1                                    | tr F5H747 F5H747_HUMAN      | 18 kDa  | 0  | 3  | 0  |
| Protein phosphatase 1B (Fragment) OS=Homo sapiens GN=PPM1B PE=3 SV=1                           | tr C9JIR6 C9JIR6_HUMAN      | 42 kDa  | 3  | 5  | 4  |
| Poly(rC)-binding protein 2 OS=Homo sapiens GN=PCBP2 PE=2 SV=1                                  | tr B4DXP5 B4DXP5_HUMAN (+3) | 34 kDa  | 9  | 9  | 2  |
| Protein FAM49B (Fragment) OS=Homo sapiens GN=FAM49B PE=4 SV=1                                  | tr ESR116 ESR116_HUMAN      | 17 kDa  | 2  | 4  | 5  |
| Ras-related protein Rab-6A (Fragment) OS=Homo sapiens GN=RAB6A PE=3 SV=1                       | tr H0YGL6 H0YGL6_HUMAN      | 23 kDa  | 0  | 4  | 6  |
| FYVE and coiled-coil domain-containing protein 1 OS=Homo sapiens GN=FYCO1 PE=2 SV=1            | tr B7ZKT7 B7ZKT7_HUMAN      | 169 kDa | 2  | 0  | 0  |
| Protocadherin-7 OS=Homo sapiens GN=PCDH7 PE=4 SV=1                                             | REVtr F5GWJ1 F5GWJ1_HUMAN   | 137 kDa | 0  | 2  | 0  |
| GTP-binding nuclear protein Ran (Fragment) OS=Homo sapiens GN=RAN PE=4 SV=1                    | tr F5H018 F5H018_HUMAN      | 23 kDa  | 4  | 2  | 0  |
| Signal transducer and activator of transcription 3 OS=Homo sapiens GN=STAT3 PE=4 SV=1          | tr G8JLH9 G8JLH9_HUMAN      | 76 kDa  | 4  | 0  | 3  |
| Copine 1 OS=Homo sapiens GN=CPNE1 PE=4 SV=1                                                    | tr B0QZ18 B0QZ18_HUMAN (+1) | 60 kDa  | 6  | 0  | 0  |
| Fructose-bisphosphate aldolase OS=Homo sapiens GN=ALDOC PE=3 SV=1                              | tr A8MVZ9 A8MVZ9_HUMAN      | 36 kDa  | 9  | 0  | 4  |
| Septin 6 OS=Homo sapiens GN=SEPT6 PE=3 SV=1                                                    | tr B1AMS2 B1AMS2_HUMAN (+1) | 49 kDa  | 10 | 2  | 2  |
| Protein disulfide-isomerase OS=Homo sapiens GN=P4HB PE=3 SV=1                                  | tr F5H8J2 F5H8J2_HUMAN (+1) | 51 kDa  | 6  | 0  | 0  |
| Vigilin (Fragment) OS=Homo sapiens GN=HDLBP PE=4 SV=1                                          | tr H0Y394 H0Y394_HUMAN      | 109 kDa | 2  | 0  | 0  |
| V-type proton ATPase subunit D OS=Homo sapiens GN=ATP6V1D PE=4 SV=1                            | tr G3V2S6 G3V2S6_HUMAN      | 22 kDa  | 0  | 4  | 5  |
| Differentially-expressed in FDCP 6 homolog OS=Homo sapiens GN=DEF6 PE=4 SV=1                   | tr F5H853 F5H853_HUMAN      | 44 kDa  | 3  | 2  | 2  |
| Ras-related protein Rab-2A OS=Homo sapiens GN=RAB2A PE=3 SV=1                                  | tr E9PKL7 E9PKL7_HUMAN      | 21 kDa  | 0  | 12 | 10 |
| Ras-related protein Rab-1B OS=Homo sapiens GN=RAB1B PE=3 SV=1                                  | tr E9PLD0 E9PLD0_HUMAN      | 18 kDa  | 0  | 7  | 10 |
| Rho GTPase-activating protein 4 OS=Homo sapiens GN=ARHGAP4 PE=4 SV=1                           | tr E7EQN5 E7EQN5_HUMAN (+1) | 103 kDa | 0  | 0  | 3  |
| Eukaryotic translation initiation factor 3 subunit J OS=Homo sapiens GN=EIF3J PE=2 SV=1        | tr B4DUI3 B4DUI3_HUMAN      | 23 kDa  | 6  | 0  | 0  |
| C-myc promoter-binding protein (Fragment) OS=Homo sapiens GN=DENND4A PE=4 SV=1                 | tr H3BTW5 H3BTW5_HUMAN      | 113 kDa | 0  | 2  | 6  |
| Putative tropomyosin alpha-3 chain-like protein OS=Homo sapiens PE=5 SV=2                      | sp A6NL28 TPM3L_HUMAN       | 26 kDa  | 0  | 0  | 0  |
| Histone H2B OS=Homo sapiens GN=HIST2H2BF PE=2 SV=1                                             | tr B4DR52 B4DR52_HUMAN      | 18 kDa  | 0  | 4  | 5  |
| Annexin OS=Homo sapiens GN=ANXA5 PE=3 SV=1                                                     | tr D6RBL5 D6RBL5_HUMAN      | 29 kDa  | 2  | 3  | 7  |
| Proteasome activator complex subunit 1 OS=Homo sapiens GN=PSME1 PE=4 SV=2                      | tr A6NJG9 A6NJG9_HUMAN (+1) | 29 kDa  | 6  | 3  | 3  |
| Structural maintenance of chromosomes protein 1A (Fragment) OS=Homo sapiens GN=SMC1A PE=4 SV=1 | tr H0Y7K8 H0Y7K8_HUMAN      | 34 kDa  | 5  | 0  | 3  |
| Chromosome 10 open reading frame 68 OS=Homo sapiens GN=C10orf68 PE=4 SV=1                      | tr A2A3D6 A2A3D6_HUMAN      | 67 kDa  | 0  | 0  | 0  |
| Eukaryotic translation initiation factor 3 subunit C OS=Homo sapiens GN=EIF3C PE=4 SV=1        | tr B5ME19 B5ME19_HUMAN (+1) | 105 kDa | 3  | 0  | 0  |
| Protein FAM65A (Fragment) OS=Homo sapiens GN=FAM65A PE=4 SV=1                                  | tr H0Y442 H0Y442_HUMAN      | 131 kDa | 0  | 0  | 3  |
| Phosphodiesterase 5A, cGMP-specific, isoform CRA_a OS=Homo sapiens GN=PDE5A PE=4 SV=1          | tr G5E9C5 G5E9C5_HUMAN      | 94 kDa  | 5  | 0  | 0  |
| Eukaryotic translation initiation factor 3 subunit H OS=Homo sapiens GN=EIF3S3 PE=2 SV=1       | tr B3KS98 B3KS98_HUMAN      | 42 kDa  | 3  | 0  | 0  |
| Splicing factor, proline- and glutamine-rich (Fragment) OS=Homo sapiens GN=SFPQ PE=4 SV=1      | tr H0Y9K7 H0Y9K7_HUMAN      | 26 kDa  | 0  | 3  | 3  |
| Lymphocyte-specific protein 1 OS=Homo sapiens GN=LSP1 PE=4 SV=1                                | tr E9PBV6 E9PBV6_HUMAN (+1) | 30 kDa  | 5  | 0  | 0  |
| PDZ and LIM domain protein 5 OS=Homo sapiens GN=PDLIM5 PE=4 SV=1                               | tr D6RB78 D6RB78_HUMAN      | 68 kDa  | 3  | 0  | 0  |
| Hexokinase-1 OS=Homo sapiens GN=HK1 PE=4 SV=1                                                  | tr E7ENR4 E7ENR4_HUMAN      | 106 kDa | 0  | 0  | 4  |
| Heterogeneous nuclear ribonucleoprotein A3 OS=Homo sapiens GN=HNRNPA3 PE=4 SV=1                | tr E7EWI9 E7EWI9_HUMAN      | 34 kDa  | 2  | 2  | 2  |
| Thioredoxin OS=Homo sapiens GN=TXN PE=4 SV=1                                                   | tr B1ALW1 B1ALW1_HUMAN      | 9 kDa   | 0  | 0  | 0  |
| Ras-related protein Rab-35 (Fragment) OS=Homo sapiens GN=RAB35 PE=3 SV=1                       | tr F5H157 F5H157_HUMAN      | 21 kDa  | 0  | 5  | 5  |
| AP-1 complex subunit gamma-1 OS=Homo sapiens GN=AP1G1 PE=2 SV=1                                | tr B3KXW5 B3KXW5_HUMAN      | 94 kDa  | 4  | 3  | 5  |
| Radixin OS=Homo sapiens GN=RDX PE=2 SV=1                                                       | tr A7YJ8 A7YJ8_HUMAN        | 71 kDa  | 7  | 0  | 0  |
| RuvB-like 2 OS=Homo sapiens GN=RUVBL2 PE=2 SV=1                                                | tr B3KQ59 B3KQ59_HUMAN      | 46 kDa  | 2  | 4  | 2  |
| Threonine--tRNA ligase, cytoplasmic OS=Homo sapiens GN=TARS PE=3 SV=1                          | tr E7ERI3 E7ERI3_HUMAN      | 70 kDa  | 6  | 2  | 0  |
| Coactosin-like protein OS=Homo sapiens GN=COTL1 PE=4 SV=1                                      | tr H3BT58 H3BT58_HUMAN      | 8 kDa   | 2  | 4  | 0  |
| Peroxisome protein 5, mitochondrial OS=Homo sapiens GN=PRDX5 PE=4 SV=1                         | tr A6NG06 A6NG06_HUMAN      | 17 kDa  | 2  | 5  | 3  |
| Ribosomal protein S6 kinase OS=Homo sapiens GN=RPS6KA1 PE=3 SV=1                               | tr E9PGT3 E9PGT3_HUMAN (+1) | 81 kDa  | 0  | 4  | 0  |
| 60S ribosomal protein L23 OS=Homo sapiens GN=RPL23 PE=3 SV=1                                   | tr B9ZVP7 B9ZVP7_HUMAN      | 12 kDa  | 0  | 7  | 12 |
| Mitogen-activated protein kinase 14 OS=Homo sapiens GN=MAPK14 PE=2 SV=1                        | tr B4E0K5 B4E0K5_HUMAN      | 32 kDa  | 7  | 2  | 0  |
| Heterogeneous nuclear ribonucleoprotein H OS=Homo sapiens GN=HNRNPH1 PE=4 SV=1                 | tr E9PCY7 E9PCY7_HUMAN      | 47 kDa  | 0  | 5  | 3  |
| Rho guanine nucleotide exchange factor 6 OS=Homo sapiens GN=ARHGEF6 PE=2 SV=1                  | tr B7Z3C7 B7Z3C7_HUMAN      | 73 kDa  | 0  | 0  | 0  |
| Structural maintenance of chromosomes protein 4 OS=Homo sapiens GN=SMC4 PE=3 SV=1              | tr E9PD53 E9PD53_HUMAN      | 144 kDa | 0  | 0  | 2  |
| Meteorin OS=Homo sapiens GN=METRIN PE=4 SV=1                                                   | tr H3BUM1 H3BUM1_HUMAN      | 17 kDa  | 0  | 3  | 0  |
| Kinase suppressor of Ras 1 OS=Homo sapiens GN=KSR1 PE=4 SV=1                                   | tr F8WEA9 F8WEA9_HUMAN      | 102 kDa | 0  | 5  | 6  |
| 26S protease regulatory subunit 6A OS=Homo sapiens GN=PSMC3 PE=3 SV=1                          | tr E9PM69 E9PM69_HUMAN      | 44 kDa  | 7  | 0  | 2  |



|                                                                                                         |                             |         |    |    |    |
|---------------------------------------------------------------------------------------------------------|-----------------------------|---------|----|----|----|
| Leucine-rich repeat flightless-interacting protein 1 OS=Homo sapiens GN=LRRFIP1 PE=4 SV=1               | tr E9PGZ2 E9PGZ2_HUMAN      | 73 kDa  | 3  | 3  | 5  |
| Isocitrate dehydrogenase [NADP] OS=Homo sapiens GN=IDH2 PE=2 SV=1                                       | tr B4DFL2 B4DFL2_HUMAN      | 45 kDa  | 0  | 3  | 2  |
| Prostaglandin E synthase 3 OS=Homo sapiens GN=PTGES3 PE=2 SV=1                                          | tr B4DP21 B4DP21_HUMAN      | 15 kDa  | 0  | 2  | 2  |
| Ubiquitin carboxyl-terminal hydrolase OS=Homo sapiens GN=USP15 PE=3 SV=2                                | tr E9PCQ3 E9PCQ3_HUMAN      | 110 kDa | 2  | 0  | 0  |
| Protein phosphatase 1 regulatory subunit 12C OS=Homo sapiens GN=PPP1R12C PE=4 SV=2                      | tr B5MEC7 B5MEC7_HUMAN      | 78 kDa  | 4  | 2  | 0  |
| Kinesin heavy chain isoform 5C OS=Homo sapiens GN=KIF5C PE=3 SV=2                                       | tr E9PET8 E9PET8_HUMAN      | 99 kDa  | 3  | 4  | 2  |
| 26S protease regulatory subunit 8 OS=Homo sapiens GN=PSMC5 PE=2 SV=1                                    | tr A8K3Z3 A8K3Z3_HUMAN      | 45 kDa  | 3  | 2  | 5  |
| Serine/threonine-protein phosphatase 6 catalytic subunit OS=Homo sapiens GN=PPP6C PE=2 SV=1             | tr B7Z3E2 B7Z3E2_HUMAN      | 18 kDa  | 0  | 2  | 8  |
| 40S ribosomal protein S4, Y isoform 1 (Fragment) OS=Homo sapiens GN=RPS4Y1 PE=4 SV=1                    | tr C9JEH7 C9JEH7_HUMAN      | 29 kDa  | 0  | 6  | 6  |
| 14-3-3 protein zeta/delta OS=Homo sapiens GN=YWHAZ PE=2 SV=1                                            | tr B0AZS6 B0AZS6_HUMAN      | 19 kDa  | 0  | 10 | 8  |
| Calpain-9 OS=Homo sapiens GN=CAPN9 PE=4 SV=1                                                            | REVtr E7ESS6 E7ESS6_HUMAN   | 72 kDa  | 0  | 0  | 0  |
| Protein Wnt OS=Homo sapiens GN=WNT11 PE=3 SV=1                                                          | REVtr E9PJL6 E9PJL6_HUMAN   | 27 kDa  | 0  | 2  | 0  |
| B-cell CLL/lymphoma 9-like protein (Fragment) OS=Homo sapiens GN=BCL9L PE=4 SV=2                        | tr E9PIW0 E9PIW0_HUMAN      | 79 kDa  | 2  | 0  | 0  |
| Keratin, type I cytoskeletal 18 OS=Homo sapiens GN=KRT18 PE=3 SV=1                                      | REVtr F8VZY9 F8VZY9_HUMAN   | 44 kDa  | 0  | 2  | 0  |
| Annexin OS=Homo sapiens GN=ANXA7 PE=2 SV=1                                                              | tr B4DT77 B4DT77_HUMAN      | 38 kDa  | 6  | 0  | 0  |
| Vacuolar protein sorting-associated protein 29 OS=Homo sapiens GN=VPS29 PE=4 SV=1                       | tr F8VXU5 F8VXU5_HUMAN      | 24 kDa  | 2  | 0  | 0  |
| ING2 splice variant 1 OS=Homo sapiens GN=ING2b PE=2 SV=1                                                | tr B6ZDS1 B6ZDS1_HUMAN (+1) | 28 kDa  | 0  | 0  | 2  |
| RNA-binding protein 39 OS=Homo sapiens GN=RBM39 PE=4 SV=1                                               | tr E1P5S2 E1P5S2_HUMAN      | 41 kDa  | 0  | 3  | 7  |
| Phosphatidylinositol 3,4,5-trisphosphate 5-phosphatase 1 (Fragment) OS=Homo sapiens GN=INPP5D PE=4 SV=1 | tr H0Y5Q9 H0Y5Q9_HUMAN      | 91 kDa  | 3  | 2  | 2  |
| 1,4-alpha-glucan-branching enzyme OS=Homo sapiens GN=GBE1 PE=4 SV=1                                     | tr E9PGM4 E9PGM4_HUMAN      | 76 kDa  | 3  | 0  | 0  |
| Ribose-phosphate pyrophosphokinase 2 OS=Homo sapiens GN=PRPS2 PE=4 SV=1                                 | tr D3YTJ7 D3YTJ7_HUMAN      | 22 kDa  | 0  | 0  | 2  |
| U5 small nuclear ribonucleoprotein 200 kDa helicase OS=Homo sapiens GN=SNRNP200 PE=4 SV=2               | tr C9JQA9 C9JQA9_HUMAN      | 71 kDa  | 0  | 0  | 2  |
| Proliferation-associated protein 2G4 OS=Homo sapiens GN=PA2G4 PE=4 SV=1                                 | tr F8VY8 F8VY8_HUMAN        | 42 kDa  | 8  | 0  | 0  |
| 40S ribosomal protein S14 OS=Homo sapiens GN=RPS14 PE=4 SV=1                                            | tr E5RH77 E5RH77_HUMAN      | 14 kDa  | 0  | 5  | 6  |
| Dedicator of cytokinesis protein 2 OS=Homo sapiens GN=DOCK2 PE=4 SV=1                                   | tr E5RFJ0 E5RFJ0_HUMAN      | 119 kDa | 0  | 5  | 4  |
| Arachidonate 15-lipoxygenase OS=Homo sapiens GN=ALOX15 PE=2 SV=1                                        | tr B7ZA11 B7ZA11_HUMAN (+1) | 70 kDa  | 4  | 0  | 0  |
| ADP-ribosylation factor-like 8B, isoform CRA_a OS=Homo sapiens GN=ARL8B PE=2 SV=1                       | tr B4DI85 B4DI85_HUMAN      | 19 kDa  | 0  | 5  | 10 |
| Myelin oligodendrocyte glycoprotein OS=Homo sapiens GN=MOG PE=4 SV=1                                    | REVtr B0UZR7 B0UZR7_HUMAN   | 34 kDa  | 0  | 0  | 0  |
| Heat shock 70 kDa protein 4L OS=Homo sapiens GN=HSPA4L PE=3 SV=2                                        | tr E7ES43 E7ES43_HUMAN      | 98 kDa  | 0  | 2  | 0  |
| COP9 signalosome complex subunit 4 OS=Homo sapiens GN=COP54 PE=4 SV=1                                   | tr D6RAX7 D6RAX7_HUMAN      | 48 kDa  | 4  | 0  | 2  |
| Regulator of G-protein-signaling 3 OS=Homo sapiens GN=RGS3 PE=2 SV=1                                    | tr B3KUB2 B3KUB2_HUMAN      | 66 kDa  | 0  | 2  | 0  |
| Fermitin family homolog 3 (Fragment) OS=Homo sapiens GN=FERMT3 PE=4 SV=1                                | tr H0YFT5 H0YFT5_HUMAN      | 20 kDa  | 3  | 0  | 0  |
| 4-trimethylaminobutylaldehyde dehydrogenase OS=Homo sapiens GN=ALDH9A1 PE=2 SV=1                        | tr B4DXY7 B4DXY7_HUMAN      | 46 kDa  | 6  | 0  | 0  |
| AP-2 complex subunit alpha-2 OS=Homo sapiens GN=AP2A2 PE=4 SV=1                                         | tr E9PJJ7 E9PJJ7_HUMAN      | 75 kDa  | 0  | 0  | 2  |
| Tubulin tyrosine ligase-like family, member 12 OS=Homo sapiens GN=TTL12 PE=4 SV=1                       | tr B1AH89 B1AH89_HUMAN      | 74 kDa  | 2  | 0  | 0  |
| Putative RNA-binding protein Luc7-like 2 OS=Homo sapiens GN=LUC7L2 PE=2 SV=1                            | tr B7Z4Q3 B7Z4Q3_HUMAN      | 54 kDa  | 0  | 0  | 8  |
| Heterogeneous nuclear ribonucleoprotein A/B OS=Homo sapiens GN=HNRNPAB PE=4 SV=1                        | tr D6RB20 D6RB20_HUMAN      | 36 kDa  | 3  | 4  | 0  |
| 5'-AMP-activated protein kinase subunit gamma-1 OS=Homo sapiens GN=PRKAG1 PE=2 SV=1                     | tr B4DDT7 B4DDT7_HUMAN (+1) | 34 kDa  | 0  | 5  | 5  |
| AP-1 complex subunit beta-1 (Fragment) OS=Homo sapiens GN=AP1B1 PE=4 SV=1                               | tr C9J1E7 C9J1E7_HUMAN      | 65 kDa  | 0  | 3  | 2  |
| Regulator of G-protein-signaling 14 (Fragment) OS=Homo sapiens GN=RGS14 PE=4 SV=1                       | tr H0Y8W3 H0Y8W3_HUMAN      | 47 kDa  | 0  | 8  | 2  |
| Copine-3 (Fragment) OS=Homo sapiens GN=CPNE3 PE=4 SV=1                                                  | tr E5RG68 E5RG68_HUMAN      | 27 kDa  | 11 | 0  | 0  |
| Cytosolic purine 5'-nucleotidase OS=Homo sapiens GN=NT5C2 PE=2 SV=1                                     | tr B7Z382 B7Z382_HUMAN      | 61 kDa  | 5  | 0  | 0  |
| pre-mRNA 3' end-processing protein WDR33 (Fragment) OS=Homo sapiens GN=WDR33 PE=4 SV=1                  | tr B9A053 B9A053_HUMAN      | 14 kDa  | 0  | 0  | 0  |
| Calpain-3 OS=Homo sapiens GN=CAPN3 PE=4 SV=1                                                            | tr F8W8F5 F8W8F5_HUMAN      | 94 kDa  | 0  | 2  | 0  |
| Leucine-rich repeat serine/threonine-protein kinase 2 OS=Homo sapiens GN=LRRK2 PE=4 SV=1                | tr E9PC85 E9PC85_HUMAN      | 143 kDa | 0  | 0  | 2  |
| Sodium channel protein type 3 subunit alpha (Fragment) OS=Homo sapiens GN=SCN3A PE=4 SV=1               | tr E7EUE6 E7EUE6_HUMAN      | 154 kDa | 2  | 0  | 0  |
| Cytoplasmic dynein 1 intermediate chain 2 OS=Homo sapiens GN=DYNC112 PE=2 SV=1                          | tr B7ZA04 B7ZA04_HUMAN (+1) | 70 kDa  | 3  | 0  | 3  |
| Myosin, heavy chain 9, non-muscle (Fragment) OS=Homo sapiens GN=MYH9 PE=4 SV=1                          | tr B1AH99 B1AH99_HUMAN      | 12 kDa  | 2  | 0  | 0  |
| SH3 domain-containing kinase-binding protein 1 OS=Homo sapiens GN=SH3KBP1 PE=2 SV=1                     | tr B7Z6E8 B7Z6E8_HUMAN      | 44 kDa  | 2  | 2  | 2  |
| RAF proto-oncogene serine/threonine-protein kinase OS=Homo sapiens GN=RAF1 PE=2 SV=1                    | tr B4E0X2 B4E0X2_HUMAN (+1) | 64 kDa  | 0  | 0  | 2  |
| ADP-ribosylation factor-like protein 1 OS=Homo sapiens GN=ARL1 PE=2 SV=1                                | tr B4DWW1 B4DWW1_HUMAN (+1) | 19 kDa  | 0  | 4  | 8  |
| Eukaryotic translation initiation factor 3 subunit L OS=Homo sapiens GN=EIF3EIP PE=4 SV=1               | tr B0QY89 B0QY89_HUMAN      | 71 kDa  | 5  | 0  | 0  |
| Sorcin OS=Homo sapiens GN=SRI PE=4 SV=2                                                                 | tr A8MTH6 A8MTH6_HUMAN (+2) | 20 kDa  | 0  | 6  | 4  |
| Striatin-4 OS=Homo sapiens GN=STRN4 PE=4 SV=1                                                           | tr F8VYA6 F8VYA6_HUMAN      | 81 kDa  | 0  | 0  | 8  |
| 40S ribosomal protein S27 OS=Homo sapiens GN=RPS27L PE=3 SV=1                                           | tr H0YMV8 H0YMV8_HUMAN      | 11 kDa  | 0  | 4  | 4  |

|                                                                                                                      |                                |         |   |   |   |
|----------------------------------------------------------------------------------------------------------------------|--------------------------------|---------|---|---|---|
| Transgelin (Fragment) OS=Homo sapiens GN=TAGLN PE=4 SV=1                                                             | tr HOYCU9 HOYCU9_HUMAN         | 17 kDa  | 3 | 5 | 3 |
| T-complex protein 1 subunit epsilon OS=Homo sapiens GN=CCT5 PE=2 SV=1                                                | tr B7ZAR1 B7ZAR1_HUMAN (+1)    | 55 kDa  | 5 | 0 | 0 |
| Disrupted in schizophrenia 1 isoform 14 OS=Homo sapiens GN=DISC1 PE=2 SV=1                                           | REVtr C4P093 C4P093_HUMAN (+1) | 59 kDa  | 0 | 0 | 0 |
| Ras-related protein Rab-5C OS=Homo sapiens GN=RAB5C PE=3 SV=1                                                        | tr F8W1H5 F8W1H5_HUMAN         | 27 kDa  | 0 | 5 | 3 |
| Drebrin-like protein OS=Homo sapiens GN=DBNL PE=2 SV=1                                                               | tr B4DDD6 B4DDD6_HUMAN         | 46 kDa  | 4 | 0 | 0 |
| Proto-oncogene vav OS=Homo sapiens GN=VAV1 PE=4 SV=1                                                                 | tr F5H5P4 F5H5P4_HUMAN         | 87 kDa  | 0 | 0 | 2 |
| Rho guanine nucleotide exchange factor (GEF) 7 OS=Homo sapiens GN=ARHGEF7 PE=4 SV=1                                  | tr B1ALK7 B1ALK7_HUMAN         | 80 kDa  | 0 | 0 | 0 |
| Galactokinase OS=Homo sapiens GN=GALK1 PE=2 SV=1                                                                     | tr B4E1G6 B4E1G6_HUMAN         | 45 kDa  | 5 | 0 | 2 |
| Exportin-1 (Fragment) OS=Homo sapiens GN=XPO1 PE=4 SV=1                                                              | tr C9JKM9 C9JKM9_HUMAN         | 21 kDa  | 0 | 3 | 2 |
| RAS guanyl releasing protein 4 variant 6 OS=Homo sapiens GN=RASGRP4 PE=2 SV=1                                        | tr COLTP3 COLTP3_HUMAN         | 67 kDa  | 0 | 4 | 2 |
| Serine-threonine kinase receptor-associated protein OS=Homo sapiens GN=STRAP PE=2 SV=1                               | tr B4DNJ6 B4DNJ6_HUMAN         | 40 kDa  | 3 | 0 | 0 |
| Rho-associated protein kinase 2 OS=Homo sapiens GN=ROCK2 PE=4 SV=1                                                   | tr D6REE7 D6REE7_HUMAN         | 51 kDa  | 0 | 2 | 3 |
| Cytoskeleton-associated protein 5 (Fragment) OS=Homo sapiens GN=CKAP5 PE=4 SV=1                                      | tr HOYDX5 HOYDX5_HUMAN         | 23 kDa  | 0 | 3 | 3 |
| 60S ribosomal protein L24 OS=Homo sapiens GN=RPL24 PE=4 SV=1                                                         | tr C9JNW5 C9JNW5_HUMAN (+1)    | 18 kDa  | 0 | 3 | 3 |
| Stress-70 protein, mitochondrial (Fragment) OS=Homo sapiens GN=HSPA9 PE=3 SV=1                                       | tr D6RJI2 D6RJI2_HUMAN         | 10 kDa  | 0 | 4 | 3 |
| Protein SEC13 homolog OS=Homo sapiens GN=SEC13 PE=4 SV=1                                                             | tr A8MV37 A8MV37_HUMAN (+1)    | 34 kDa  | 0 | 3 | 4 |
| Cytoplasmic dynein 1 heavy chain 1 (Fragment) OS=Homo sapiens GN=DYNC1H1 PE=4 SV=1                                   | tr HOYJ21 HOYJ21_HUMAN         | 21 kDa  | 0 | 3 | 4 |
| Septin-1 (Fragment) OS=Homo sapiens GN=SEPT1 PE=4 SV=1                                                               | tr H3B552 H3B552_HUMAN         | 29 kDa  | 0 | 2 | 3 |
| WD repeat- and FYVE domain-containing protein 4 OS=Homo sapiens GN=WDFY4 PE=4 SV=1                                   | tr F8WCU4 F8WCU4_HUMAN         | 115 kDa | 0 | 2 | 3 |
| Cytokine receptor-like factor 3 OS=Homo sapiens GN=CRLF3 PE=2 SV=1                                                   | tr B4DJU5 B4DJU5_HUMAN         | 36 kDa  | 5 | 0 | 0 |
| Kinesin-like protein KIF2A OS=Homo sapiens GN=KIF2A PE=3 SV=1                                                        | tr E9PB70 E9PB70_HUMAN         | 78 kDa  | 2 | 2 | 0 |
| FAD-AMP lyase (cyclizing) (Fragment) OS=Homo sapiens GN=DAK PE=4 SV=1                                                | tr HOYCY6 HOYCY6_HUMAN         | 55 kDa  | 4 | 0 | 0 |
| DBIRD complex subunit KIAA1967 (Fragment) OS=Homo sapiens GN=KIAA1967 PE=4 SV=1                                      | tr HOYB24 HOYB24_HUMAN         | 69 kDa  | 0 | 2 | 2 |
| 26S protease regulatory subunit 10B (Fragment) OS=Homo sapiens GN=PSMC6 PE=4 SV=1                                    | tr HOYJC0 HOYJC0_HUMAN         | 30 kDa  | 0 | 2 | 0 |
| 14-3-3 protein eta (Fragment) OS=Homo sapiens GN=YWHAH PE=4 SV=1                                                     | tr A2IDB2 A2IDB2_HUMAN         | 19 kDa  | 2 | 3 | 4 |
| Fibulin 1 OS=Homo sapiens GN=FBLN1 PE=4 SV=1                                                                         | tr B1AHL2 B1AHL2_HUMAN         | 78 kDa  | 0 | 2 | 0 |
| Protein CNPPD1 (Fragment) OS=Homo sapiens GN=CNPPD1 PE=4 SV=1                                                        | tr C9JF31 C9JF31_HUMAN         | 34 kDa  | 0 | 4 | 0 |
| Isoform 3 of EF-hand calcium-binding domain-containing protein 5 OS=Homo sapiens GN=EFCAB5                           | sp A4FU69-3 EFCB5_HUMAN (+1)   | 159 kDa | 0 | 0 | 2 |
| PAP-associated domain-containing protein 5 OS=Homo sapiens GN=PAPD5 PE=2 SV=1                                        | tr B4DV38 B4DV38_HUMAN         | 76 kDa  | 0 | 0 | 0 |
| LIM and calponin homology domains-containing protein 1 OS=Homo sapiens GN=LIMCH1 PE=4 SV=1                           | tr G5EA03 G5EA03_HUMAN         | 164 kDa | 2 | 0 | 0 |
| Eukaryotic translation initiation factor 3 subunit D OS=Homo sapiens GN=EIF3D PE=2 SV=1                              | tr B4DVY1 B4DVY1_HUMAN         | 58 kDa  | 3 | 0 | 0 |
| Small nuclear ribonucleoprotein Sm D3 OS=Homo sapiens GN=SNRPD3 PE=2 SV=1                                            | tr B4DJP7 B4DJP7_HUMAN         | 13 kDa  | 0 | 3 | 2 |
| Voltage-gated potassium channel subunit beta-2 OS=Homo sapiens GN=KCNAB2 PE=4 SV=2                                   | tr E7ESI4 E7ESI4_HUMAN         | 18 kDa  | 3 | 0 | 0 |
| Transcription elongation factor A protein 1 OS=Homo sapiens GN=TCEA1 PE=4 SV=1                                       | tr B7Z4S1 B7Z4S1_HUMAN         | 13 kDa  | 3 | 0 | 3 |
| Eukaryotic translation initiation factor 3 subunit F OS=Homo sapiens GN=EIF3F PE=2 SV=1                              | tr B3KSH1 B3KSH1_HUMAN         | 39 kDa  | 3 | 0 | 0 |
| Spliceosome RNA helicase DDX39B OS=Homo sapiens GN=DDX39B PE=4 SV=1                                                  | tr F8VQ10 F8VQ10_HUMAN         | 51 kDa  | 4 | 0 | 0 |
| Protein SET OS=Homo sapiens GN=SET PE=3 SV=1                                                                         | tr B2REB8 B2REB8_HUMAN         | 31 kDa  | 6 | 0 | 2 |
| Mitotic checkpoint protein BUB3 OS=Homo sapiens GN=BUB3 PE=2 SV=1                                                    | tr B4DDM6 B4DDM6_HUMAN         | 28 kDa  | 4 | 0 | 0 |
| DENN domain-containing protein 4B (Fragment) OS=Homo sapiens GN=DENND4B PE=4 SV=1                                    | tr E9PAK5 E9PAK5_HUMAN         | 133 kDa | 0 | 3 | 0 |
| DnaJ homolog subfamily A member 2 (Fragment) OS=Homo sapiens GN=DNAJA2 PE=4 SV=1                                     | tr H3BMW5 H3BMW5_HUMAN         | 15 kDa  | 0 | 0 | 2 |
| Peptidyl-prolyl cis-trans isomerase (Fragment) OS=Homo sapiens GN=PPIH PE=3 SV=1                                     | tr C9JQD4 C9JQD4_HUMAN         | 16 kDa  | 0 | 3 | 0 |
| Nuclear receptor-binding protein OS=Homo sapiens GN=NRBP1 PE=4 SV=1                                                  | tr F8W6G1 F8W6G1_HUMAN         | 61 kDa  | 2 | 0 | 0 |
| Protein phosphatase 2A activator, regulatory subunit 4 OS=Homo sapiens GN=PPP2R4 PE=4 SV=1                           | tr A6PVN5 A6PVN5_HUMAN         | 37 kDa  | 3 | 0 | 0 |
| Dihydropyrimidinase-related protein 1 OS=Homo sapiens GN=CRMP1 PE=4 SV=1                                             | tr E9PD68 E9PD68_HUMAN         | 62 kDa  | 5 | 0 | 0 |
| ATP-binding cassette sub-family E member 1 OS=Homo sapiens GN=ABCE1 PE=4 SV=1                                        | tr D6R9I9 D6R9I9_HUMAN         | 47 kDa  | 4 | 0 | 0 |
| RuvB-like 1 OS=Homo sapiens GN=RUVBL1 PE=4 SV=1                                                                      | tr E7ETRO E7ETRO_HUMAN         | 35 kDa  | 3 | 0 | 0 |
| N-alpha-acetyltransferase 50 OS=Homo sapiens GN=NAA50 PE=4 SV=1                                                      | tr C9J5D1 C9J5D1_HUMAN         | 15 kDa  | 0 | 3 | 2 |
| Calcium/calmodulin-dependent protein kinase (CaM kinase) II delta, isoform CRA_e OS=Homo sapiens GN=CAMK2D PE=4 SV=1 | tr D6R938 D6R938_HUMAN (+1)    | 56 kDa  | 5 | 0 | 0 |
| Proteasome subunit alpha type-1 OS=Homo sapiens GN=PSMA1 PE=4 SV=1                                                   | tr F5GX11 F5GX11_HUMAN         | 27 kDa  | 2 | 2 | 2 |
| Putative deoxyribose-phosphate aldolase OS=Homo sapiens GN=DERA PE=4 SV=1                                            | tr E9PPM8 E9PPM8_HUMAN         | 31 kDa  | 0 | 3 | 2 |
| Protein-arginine deiminase type-2 OS=Homo sapiens GN=PADI2 PE=2 SV=1                                                 | tr B4DIU3 B4DIU3_HUMAN         | 62 kDa  | 3 | 0 | 0 |
| Phospholipase DDHD2 OS=Homo sapiens GN=DDHD2 PE=2 SV=1                                                               | tr B3KX85 B3KX85_HUMAN         | 38 kDa  | 0 | 0 | 2 |
| Coatmer subunit gamma-1 (Fragment) OS=Homo sapiens GN=COPG1 PE=4 SV=1                                                | tr HOY8X7 HOY8X7_HUMAN         | 21 kDa  | 0 | 3 | 5 |
| Eukaryotic translation initiation factor 3 subunit E OS=Homo sapiens GN=EIF3E PE=3 SV=1                              | tr E5RGA2 E5RGA2_HUMAN         | 41 kDa  | 4 | 0 | 0 |
| DnaI homolog subfamily A member 1 OS=Homo sapiens GN=DNAJA1 PE=2 SV=1                                                | tr B7Z5C0 B7Z5C0_HUMAN         | 28 kDa  | 0 | 0 | 3 |

|                                                                                                                              |                               |         |   |   |   |
|------------------------------------------------------------------------------------------------------------------------------|-------------------------------|---------|---|---|---|
| DnaJ homolog subfamily B member 1 OS=Homo sapiens GN=DNAJB1 PE=2 SV=1                                                        | tr B4DX52 B4DX52_HUMAN        | 27 kDa  | 2 | 2 | 2 |
| Transportin-1 OS=Homo sapiens GN=TNPO1 PE=2 SV=1                                                                             | tr B4DSCO B4DSCO_HUMAN (+1)   | 15 kDa  | 0 | 0 | 2 |
| Zinc transporter 3 (Fragment) OS=Homo sapiens GN=SLC30A3 PE=4 SV=1                                                           | REVtr H7BZ83 H7BZ83_HUMAN     | 33 kDa  | 0 | 2 | 0 |
| Cytoplasmic dynein 1 light intermediate chain 1 OS=Homo sapiens GN=DYNC1L1 PE=4 SV=1                                         | tr E9PHI6 E9PHI6_HUMAN        | 43 kDa  | 2 | 0 | 0 |
| Fibrocystin-L (Fragment) OS=Homo sapiens GN=PKHD1L1 PE=4 SV=1                                                                | REVtr HOYF65 HOYF65_HUMAN     | 129 kDa | 0 | 0 | 0 |
| 6-phosphofructokinase, muscle type (Fragment) OS=Homo sapiens GN=PFKM PE=4 SV=1                                              | tr F8VNX2 F8VNX2_HUMAN (+3)   | 17 kDa  | 0 | 3 | 0 |
| Protein mago nashi homolog 2 OS=Homo sapiens GN=MAGOHB PE=4 SV=1                                                             | tr A6NEC0 A6NEC0_HUMAN (+1)   | 13 kDa  | 3 | 0 | 3 |
| Tyrosine-protein kinase Fes/Fps OS=Homo sapiens GN=FES PE=3 SV=1                                                             | tr E7ENM8 E7ENM8_HUMAN        | 77 kDa  | 2 | 0 | 3 |
| Protein disulfide-isomerase A6 OS=Homo sapiens GN=PDIA6 PE=3 SV=1                                                            | tr B5MCCQ5 B5MCCQ5_HUMAN      | 53 kDa  | 5 | 0 | 0 |
| Nuclease-sensitive element-binding protein 1 (Fragment) OS=Homo sapiens GN=YBX1 PE=4 SV=1                                    | tr HOY449 HOY449_HUMAN        | 42 kDa  | 0 | 2 | 3 |
| Endoplasmic (Fragment) OS=Homo sapiens GN=HSP90B1 PE=4 SV=1                                                                  | tr HOYIV0 HOYIV0_HUMAN        | 17 kDa  | 4 | 0 | 0 |
| Glyoxalase domain-containing protein 4 OS=Homo sapiens GN=GLOD4 PE=2 SV=1                                                    | tr B7Z403 B7Z403_HUMAN        | 32 kDa  | 5 | 0 | 0 |
| Guanine nucleotide-binding protein G(i)/G(s)/G(t) subunit beta-2 OS=Homo sapiens GN=GNB2 PE=4 SV=1                           | tr E7EP32 E7EP32_HUMAN        | 32 kDa  | 0 | 3 | 0 |
| Ras-related protein Ral-B (Fragment) OS=Homo sapiens GN=RALB PE=4 SV=1                                                       | tr C9J6B1 C9J6B1_HUMAN        | 19 kDa  | 0 | 3 | 2 |
| DNA-directed RNA polymerases I and III subunit RPAC1 OS=Homo sapiens GN=POLR1C PE=4 SV=1                                     | tr E7EQB9 E7EQB9_HUMAN        | 34 kDa  | 0 | 3 | 0 |
| EMILIN-1 (Fragment) OS=Homo sapiens GN=EMILIN1 PE=4 SV=1                                                                     | tr HOY7A0 HOY7A0_HUMAN        | 36 kDa  | 0 | 0 | 2 |
| Protein phosphatase 1 regulatory subunit 12A (Fragment) OS=Homo sapiens GN=PPP1R12A PE=4 SV=1                                | tr HOYIS3 HOYIS3_HUMAN        | 27 kDa  | 3 | 0 | 0 |
| 26S proteasome non-ATPase regulatory subunit 3 OS=Homo sapiens GN=PSMD3 PE=2 SV=1                                            | tr B4DT72 B4DT72_HUMAN        | 41 kDa  | 3 | 0 | 0 |
| Bridging integrator 2 OS=Homo sapiens GN=BIN2 PE=4 SV=1                                                                      | tr F5H0W4 F5H0W4_HUMAN        | 59 kDa  | 0 | 0 | 3 |
| Aldehyde dehydrogenase family 16 member A1 OS=Homo sapiens GN=ALDH16A1 PE=4 SV=1                                             | tr F5H4B6 F5H4B6_HUMAN (+1)   | 67 kDa  | 2 | 0 | 0 |
| Serine/arginine-rich-splicing factor 2 OS=Homo sapiens GN=SFRS2 PE=2 SV=1                                                    | tr B4DN89 B4DN89_HUMAN        | 24 kDa  | 0 | 0 | 3 |
| Nck-associated protein 1-like OS=Homo sapiens GN=NCKAP1L PE=4 SV=1                                                           | tr F8W050 F8W050_HUMAN        | 52 kDa  | 0 | 0 | 3 |
| Ras-related protein Rab-18 (Fragment) OS=Homo sapiens GN=RAB18 PE=3 SV=1                                                     | tr HOY6T8 HOY6T8_HUMAN        | 33 kDa  | 0 | 3 | 0 |
| HCG2002594, isoform CRA_a OS=Homo sapiens GN=SEPT5 PE=2 SV=1                                                                 | tr B4DJ62 B4DJ62_HUMAN (+1)   | 37 kDa  | 2 | 0 | 0 |
| Abl interactor 1 OS=Homo sapiens GN=ABI1 PE=4 SV=2                                                                           | tr A6NFN2 A6NFN2_HUMAN (+1)   | 55 kDa  | 2 | 0 | 0 |
| Ubiquitin carboxyl-terminal hydrolase OS=Homo sapiens GN=USP14 PE=3 SV=2                                                     | tr A6NJA2 A6NJA2_HUMAN (+1)   | 51 kDa  | 4 | 0 | 0 |
| HCG2044799 OS=Homo sapiens GN=hCG_2044799 PE=4 SV=1                                                                          | tr H3BQZ7 H3BQZ7_HUMAN        | 85 kDa  | 0 | 2 | 3 |
| Phosphatidylinositol transfer protein beta isoform OS=Homo sapiens GN=PITPNB PE=2 SV=1                                       | tr B7Z7Q0 B7Z7Q0_HUMAN        | 32 kDa  | 3 | 2 | 0 |
| Calcineurin isoform CNEX3-10 OS=Homo sapiens GN=PPP3CA PE=2 SV=1                                                             | tr A8W6Z8 A8W6Z8_HUMAN        | 32 kDa  | 4 | 0 | 0 |
| Ras GTPase-activating-like protein IQGAP2 OS=Homo sapiens GN=IQGAP2 PE=4 SV=1                                                | tr F5H757 F5H757_HUMAN        | 124 kDa | 0 | 0 | 0 |
| Uncharacterized protein (Fragment) OS=Homo sapiens PE=4 SV=2                                                                 | tr H3BN98 H3BN98_HUMAN        | 27 kDa  | 0 | 0 | 5 |
| Protein FAM22F OS=Homo sapiens GN=FAM22F PE=2 SV=2                                                                           | REVsp A1L443 FA22F_HUMAN (+1) | 81 kDa  | 0 | 0 | 2 |
| Serine/threonine-protein phosphatase (Fragment) OS=Homo sapiens GN=PPP2CB PE=3 SV=1                                          | tr E5RFI3 E5RFI3_HUMAN (+3)   | 14 kDa  | 2 | 2 | 2 |
| PDZ and LIM domain protein 7 (Fragment) OS=Homo sapiens GN=PDLIM7 PE=4 SV=1                                                  | tr D6RH06 D6RH06_HUMAN        | 31 kDa  | 3 | 0 | 0 |
| ADP-ribosylation factor 3 OS=Homo sapiens GN=ARF3 PE=3 SV=1                                                                  | tr F5H423 F5H423_HUMAN        | 23 kDa  | 0 | 2 | 2 |
| Annexin OS=Homo sapiens GN=ANXA5 PE=3 SV=1                                                                                   | tr E7ENQ5 E7ENQ5_HUMAN        | 31 kDa  | 0 | 2 | 0 |
| Coatomer subunit zeta-1 OS=Homo sapiens GN=COPZ1 PE=4 SV=1                                                                   | tr F8VVA7 F8VVA7_HUMAN        | 22 kDa  | 0 | 0 | 2 |
| Activator of 90 kDa heat shock protein ATPase homolog 1 OS=Homo sapiens GN=AHSA1 PE=2 SV=1                                   | tr B4DUR9 B4DUR9_HUMAN (+1)   | 32 kDa  | 3 | 2 | 0 |
| Phosphoribosyl pyrophosphate synthetase 1 OS=Homo sapiens GN=PRPS1 PE=3 SV=1                                                 | tr B1ALA9 B1ALA9_HUMAN (+1)   | 24 kDa  | 0 | 0 | 0 |
| Integrator complex subunit 6 OS=Homo sapiens GN=INTS6 PE=2 SV=1                                                              | tr B4DL13 B4DL13_HUMAN        | 32 kDa  | 0 | 2 | 4 |
| SH2 domain-containing protein 3C OS=Homo sapiens GN=SH2D3C PE=4 SV=1                                                         | tr E7EUN5 E7EUN5_HUMAN        | 86 kDa  | 0 | 2 | 0 |
| GMP reductase OS=Homo sapiens GN=GMMPR2 PE=3 SV=1                                                                            | tr HOYNJ6 HOYNJ6_HUMAN        | 47 kDa  | 3 | 0 | 0 |
| Guanine nucleotide-binding protein G(i)/G(s)/G(t) subunit beta-2 (Fragment) OS=Homo sapiens GN=GNB2 PE=4 SV=1                | tr C9JXA5 C9JXA5_HUMAN        | 28 kDa  | 0 | 3 | 3 |
| Serine/threonine-protein kinase MST4 OS=Homo sapiens GN=MST4 PE=2 SV=1                                                       | tr B4E0Y9 B4E0Y9_HUMAN        | 49 kDa  | 2 | 0 | 0 |
| tRNA-splicing ligase RtcB homolog OS=Homo sapiens GN=C22orf28 PE=4 SV=2                                                      | tr E7EQS9 E7EQS9_HUMAN        | 19 kDa  | 2 | 0 | 0 |
| Vacuolar protein sorting-associated protein 26B OS=Homo sapiens GN=VPS26B PE=4 SV=1                                          | tr E9PRT4 E9PRT4_HUMAN        | 38 kDa  | 0 | 2 | 0 |
| Ras-related protein Rab-7a OS=Homo sapiens GN=RAB7A PE=3 SV=1                                                                | tr C9J8S3 C9J8S3_HUMAN        | 18 kDa  | 0 | 4 | 4 |
| Transcription elongation factor B (SIII), polypeptide 2 (18kDa, elongin B), isoform CRA_b OS=Homo sapiens GN=TCEB2 PE=4 SV=1 | tr B8ZZU8 B8ZZU8_HUMAN        | 13 kDa  | 0 | 0 | 2 |
| 26S proteasome non-ATPase regulatory subunit 1 (Fragment) OS=Homo sapiens GN=PSMD1 PE=4 SV=1                                 | tr C9J9M4 C9J9M4_HUMAN        | 23 kDa  | 0 | 2 | 0 |
| Protein RPSAP58 OS=Homo sapiens GN=RPSAP58 PE=3 SV=1                                                                         | tr A6NEO9 A6NEO9_HUMAN (+1)   | 33 kDa  | 2 | 0 | 0 |
| Copine-8 OS=Homo sapiens GN=CPNE8 PE=4 SV=2                                                                                  | REVtr E7ENV7 E7ENV7_HUMAN     | 62 kDa  | 0 | 0 | 2 |
| Sarcolemmal membrane-associated protein (Fragment) OS=Homo sapiens GN=SLMAP PE=4 SV=1                                        | REVtr H7BZK0 H7BZK0_HUMAN     | 50 kDa  | 2 | 0 | 0 |
| Dynactin subunit 2 OS=Homo sapiens GN=DCTN2 PE=4 SV=1                                                                        | tr F5H223 F5H223_HUMAN (+2)   | 42 kDa  | 2 | 0 | 0 |
| Cytosolic acyl coenzyme A thioester hydrolase OS=Homo sapiens GN=ACOT7 PE=4 SV=1                                             | tr F5GWE2 F5GWE2_HUMAN        | 25 kDa  | 3 | 0 | 0 |
| Structural maintenance of chromosomes protein 6 (Fragment) OS=Homo sapiens GN=SMC6 PE=4 SV=1                                 | tr C9JMN1 C9JMN1_HUMAN        | 85 kDa  | 2 | 0 | 0 |

|                                                                                                                       |                             |         |   |   |   |
|-----------------------------------------------------------------------------------------------------------------------|-----------------------------|---------|---|---|---|
| Protein arginine N-methyltransferase 1 OS=Homo sapiens GN=PRMT1 PE=4 SV=1                                             | tr E9PKG1 E9PKG1_HUMAN (+1) | 38 kDa  | 4 | 0 | 0 |
| T-lymphoma invasion and metastasis-inducing protein 1 OS=Homo sapiens GN=TIAM1 PE=4 SV=1                              | tr F5GZ53 F5GZ53_HUMAN      | 171 kDa | 0 | 0 | 2 |
| Serine/threonine-protein phosphatase 2A catalytic subunit beta isoform (Fragment) OS=Homo sapiens GN=PPP2CB PE=4 SV=1 | tr H0YC23 H0YC23_HUMAN      | 14 kDa  | 0 | 0 | 2 |
| Eukaryotic translation initiation factor 3 subunit M (Fragment) OS=Homo sapiens GN=EIF3M PE=4 SV=1                    | tr H0YCO8 H0YCO8_HUMAN      | 25 kDa  | 3 | 0 | 0 |
| NF-kappa-B inhibitor-interacting Ras-like protein 2 OS=Homo sapiens GN=NKIRAS2 PE=4 SV=1                              | tr C9JPP2 C9JPP2_HUMAN (+1) | 21 kDa  | 0 | 2 | 0 |
| Eukaryotic peptide chain release factor subunit 1 OS=Homo sapiens GN=ETF1 PE=2 SV=1                                   | tr B7Z7P8 B7Z7P8_HUMAN      | 47 kDa  | 3 | 0 | 0 |
| Phospholipase DDHD2 (Fragment) OS=Homo sapiens GN=DDHD2 PE=4 SV=1                                                     | tr H0YF30 H0YF30_HUMAN      | 20 kDa  | 0 | 3 | 3 |
| Protein FRG1 (Fragment) OS=Homo sapiens GN=FRG1 PE=4 SV=1                                                             | tr E9PRR7 E9PRR7_HUMAN      | 13 kDa  | 5 | 0 | 0 |
| Protein kinase C beta type (Fragment) OS=Homo sapiens GN=PRKCB PE=4 SV=1                                              | tr H3BV73 H3BV73_HUMAN      | 15 kDa  | 4 | 0 | 0 |
| Serine/threonine-protein phosphatase (Fragment) OS=Homo sapiens GN=PPP1CB PE=3 SV=1                                   | tr E7ETD8 E7ETD8_HUMAN      | 20 kDa  | 0 | 2 | 0 |
| Zinc finger protein 33A OS=Homo sapiens GN=ZNF33A PE=4 SV=1                                                           | tr F6TH33 F6TH33_HUMAN      | 95 kDa  | 0 | 2 | 0 |
| Inosine 5'-monophosphate dehydrogenase 2 (Fragment) OS=Homo sapiens GN=IMPDH2 PE=3 SV=1                               | tr H0Y4R1 H0Y4R1_HUMAN      | 51 kDa  | 2 | 0 | 0 |
| Ras GTPase-activating protein-binding protein 1 OS=Homo sapiens GN=G3BP1 PE=4 SV=1                                    | tr F5H4D6 F5H4D6_HUMAN      | 31 kDa  | 0 | 0 | 2 |
| Protein LSM14 homolog A OS=Homo sapiens GN=LSM14A PE=2 SV=1                                                           | tr B4DTG6 B4DTG6_HUMAN      | 46 kDa  | 3 | 0 | 0 |
| WD repeat-containing protein 86 OS=Homo sapiens GN=WDR86 PE=4 SV=1                                                    | REVtr F8WD10 F8WD10_HUMAN   | 18 kDa  | 0 | 0 | 0 |
| CAP-Gly domain-containing linker protein 1 (Fragment) OS=Homo sapiens GN=CLIP1 PE=4 SV=1                              | tr F5H6A0 F5H6A0_HUMAN      | 90 kDa  | 0 | 0 | 2 |
| Glutathione synthetase OS=Homo sapiens GN=GSS PE=2 SV=1                                                               | tr B6F210 B6F210_HUMAN      | 40 kDa  | 3 | 0 | 0 |
| Programmed cell death 6-interacting protein OS=Homo sapiens GN=PCDC6IP PE=4 SV=1                                      | tr F8WDK9 F8WDK9_HUMAN      | 11 kDa  | 2 | 2 | 0 |
| Protein tyrosine phosphatase type IVA 2 OS=Homo sapiens GN=PTP4A2 PE=4 SV=1                                           | tr E9PJCO E9PJCO_HUMAN      | 8 kDa   | 0 | 2 | 0 |
| Inositol-3-phosphate synthase 1 OS=Homo sapiens GN=ISYNA1 PE=4 SV=1                                                   | tr G5E9U0 G5E9U0_HUMAN      | 55 kDa  | 3 | 0 | 0 |
| Xaa-Pro aminopeptidase 1 OS=Homo sapiens GN=XPNPEP1 PE=3 SV=1                                                         | tr G8JLB2 G8JLB2_HUMAN      | 72 kDa  | 2 | 0 | 0 |
| Neuropathy target esterase OS=Homo sapiens GN=PNPLA6 PE=4 SV=1                                                        | REVtr F5H5K9 F5H5K9_HUMAN   | 143 kDa | 0 | 2 | 0 |
| Heterogeneous nuclear ribonucleoprotein Q (Fragment) OS=Homo sapiens GN=SYNCRIP PE=4 SV=1                             | tr F6UXX1 F6UXX1_HUMAN      | 20 kDa  | 0 | 3 | 0 |
| Protein BUD31 homolog OS=Homo sapiens GN=BUD31 PE=4 SV=1                                                              | tr C9JNV2 C9JNV2_HUMAN      | 14 kDa  | 0 | 0 | 2 |
| Protein arginine N-methyltransferase 5 OS=Homo sapiens GN=PRMT5 PE=2 SV=1                                             | tr B4DX49 B4DX49_HUMAN      | 66 kDa  | 2 | 0 | 0 |
| Protein kinase, cAMP-dependent, catalytic, beta OS=Homo sapiens GN=PRKACB PE=2 SV=1                                   | tr B1APG4 B1APG4_HUMAN (+1) | 37 kDa  | 3 | 0 | 2 |
| Signal recognition particle 72 kDa protein OS=Homo sapiens GN=SRP72 PE=4 SV=1                                         | tr G5E9Z8 G5E9Z8_HUMAN      | 68 kDa  | 0 | 0 | 0 |
| 26S protease regulatory subunit 7 (Fragment) OS=Homo sapiens GN=PSMC2 PE=4 SV=1                                       | tr C9JLS9 C9JLS9_HUMAN      | 15 kDa  | 3 | 0 | 0 |
| 40S ribosomal protein S4, X isoform OS=Homo sapiens GN=RPS4X PE=4 SV=1                                                | tr A6NH36 A6NH36_HUMAN      | 14 kDa  | 0 | 3 | 2 |
| T-complex protein 1 subunit alpha OS=Homo sapiens GN=TCP1 PE=3 SV=1                                                   | tr E7ERF2 E7ERF2_HUMAN      | 47 kDa  | 5 | 0 | 0 |
| N-acetyl-D-glucosamine kinase OS=Homo sapiens GN=NAGK PE=4 SV=3                                                       | tr C9JEV6 C9JEV6_HUMAN      | 32 kDa  | 2 | 0 | 0 |
| F-box only protein 3 OS=Homo sapiens GN=FBXO3 PE=4 SV=1                                                               | tr G3V1E0 G3V1E0_HUMAN      | 41 kDa  | 2 | 0 | 0 |
| Pre-B-cell leukemia transcription factor-interacting protein 1 OS=Homo sapiens GN=PBXIP1 PE=4 SV=1                    | tr F5H2F6 F5H2F6_HUMAN      | 65 kDa  | 0 | 0 | 0 |
| 26S proteasome non-ATPase regulatory subunit 7 OS=Homo sapiens GN=PSMD7 PE=2 SV=1                                     | tr B4DXI8 B4DXI8_HUMAN      | 28 kDa  | 2 | 0 | 0 |
| Uncharacterized protein (Fragment) OS=Homo sapiens PE=4 SV=1                                                          | tr H0YHGO H0YHGO_HUMAN      | 59 kDa  | 0 | 2 | 0 |
| T1-TrpRS (Fragment) OS=Homo sapiens GN=WARS PE=4 SV=1                                                                 | tr H0YJP3 H0YJP3_HUMAN      | 20 kDa  | 2 | 0 | 0 |
| 60S ribosomal protein L30 (Fragment) OS=Homo sapiens GN=RPL30 PE=3 SV=1                                               | tr E5RI99 E5RI99_HUMAN      | 13 kDa  | 0 | 0 | 3 |
| Core-binding factor subunit beta (Fragment) OS=Homo sapiens GN=CBFB PE=4 SV=1                                         | tr H3BSC0 H3BSC0_HUMAN      | 11 kDa  | 0 | 0 | 3 |
| C-terminal-binding protein 1 (Fragment) OS=Homo sapiens GN=CTBP1 PE=3 SV=1                                            | tr D6RAX2 D6RAX2_HUMAN      | 20 kDa  | 2 | 0 | 0 |
| Src family associated phosphoprotein 2, isoform CRA_c OS=Homo sapiens GN=SCAP2 PE=2 SV=1                              | tr B7Z5R3 B7Z5R3_HUMAN      | 22 kDa  | 0 | 0 | 0 |
| 26S proteasome non-ATPase regulatory subunit 6 OS=Homo sapiens GN=PSMD6 PE=4 SV=1                                     | tr C9IZE4 C9IZE4_HUMAN      | 52 kDa  | 2 | 0 | 0 |
| Glucosamine-6-phosphate isomerase 1 OS=Homo sapiens GN=GNPDA1 PE=3 SV=1                                               | tr D6R9P4 D6R9P4_HUMAN (+1) | 31 kDa  | 3 | 0 | 0 |
| S-adenosylmethionine synthase OS=Homo sapiens GN=MAT2A PE=2 SV=1                                                      | tr B4DN45 B4DN45_HUMAN      | 33 kDa  | 3 | 0 | 0 |
| 60S ribosomal protein L23a OS=Homo sapiens GN=RPL23A PE=3 SV=1                                                        | tr A8MUS3 A8MUS3_HUMAN (+1) | 22 kDa  | 0 | 3 | 3 |
| Protein TFG (Fragment) OS=Homo sapiens GN=TFG PE=4 SV=1                                                               | tr C9JJP5 C9JJP5_HUMAN (+1) | 20 kDa  | 2 | 0 | 0 |
| Caspase-3 subunit p12 OS=Homo sapiens GN=CASP3 PE=4 SV=2                                                              | tr A8MVM1 A8MVM1_HUMAN      | 21 kDa  | 3 | 0 | 0 |
| Eukaryotic translation initiation factor 2 subunit 1 (Fragment) OS=Homo sapiens GN=EIF2S1 PE=4 SV=1                   | tr G3V4T5 G3V4T5_HUMAN (+1) | 31 kDa  | 3 | 0 | 0 |
| Exportin-2 OS=Homo sapiens GN=CSE1L PE=2 SV=1                                                                         | tr B4DUC5 B4DUC5_HUMAN      | 85 kDa  | 0 | 0 | 2 |
| 40S ribosomal protein S17 (Fragment) OS=Homo sapiens GN=RPS17 PE=3 SV=1                                               | tr H0YK46 H0YK46_HUMAN (+1) | 22 kDa  | 0 | 0 | 2 |
| Transcription factor EB OS=Homo sapiens GN=TFEB PE=4 SV=1                                                             | tr B0QYS7 B0QYS7_HUMAN      | 62 kDa  | 0 | 0 | 0 |
| COP9 signalosome complex subunit 1 OS=Homo sapiens GN=GPS1 PE=4 SV=2                                                  | tr C9JFE4 C9JFE4_HUMAN      | 53 kDa  | 3 | 0 | 0 |
| EF-hand calcium-binding domain-containing protein 5 OS=Homo sapiens GN=EFCAB5 PE=4 SV=1                               | REVtr F5GYL2 F5GYL2_HUMAN   | 99 kDa  | 0 | 0 | 0 |
| Protein LOC100996747 OS=Homo sapiens GN=LOC100996747 PE=4 SV=1                                                        | tr F8VZW7 F8VZW7_HUMAN      | 13 kDa  | 0 | 0 | 3 |
| Ubiquitin-conjugating enzyme E2 N OS=Homo sapiens GN=UBE2N PE=3 SV=1                                                  | tr F8VSD4 F8VSD4_HUMAN (+1) | 12 kDa  | 0 | 3 | 0 |
| Serine/threonine-protein kinase PAK 1 OS=Homo sapiens GN=PAK1 PE=2 SV=1                                               | tr B3KNX7 B3KNX7_HUMAN (+1) | 58 kDa  | 0 | 0 | 0 |

Vacuolar protein sorting-associated protein 26A OS=Homo sapiens GN=VPS26A PE=4 SV=1  
 GMP synthase [glutamine-hydrolyzing] OS=Homo sapiens GN=GMPS PE=4 SV=1  
 6-phosphofructokinase, muscle type (Fragment) OS=Homo sapiens GN=PFKM PE=4 SV=1  
 Protein kinase C and casein kinase substrate in neurons 2 (Fragment) OS=Homo sapiens GN=PACSIN2 PE=4 SV=1  
 Protein transport protein Sec16B OS=Homo sapiens GN=SEC16B PE=4 SV=1  
 Aspartate--tRNA ligase, cytoplasmic (Fragment) OS=Homo sapiens GN=DARS PE=4 SV=1  
 Asparagine--tRNA ligase, cytoplasmic OS=Homo sapiens GN=NARS PE=2 SV=1  
 Unconventional myosin-Ie (Fragment) OS=Homo sapiens GN=MYO1E PE=4 SV=1  
 Annexin (Fragment) OS=Homo sapiens GN=ANXA2 PE=3 SV=1  
 DBIRD complex subunit KIAA1967 (Fragment) OS=Homo sapiens GN=KIAA1967 PE=4 SV=1  
 Orotate phosphoribosyltransferase OS=Homo sapiens GN=UMPS PE=2 SV=1  
 Single Ig IL-1-related receptor OS=Homo sapiens GN=SIGIRR PE=4 SV=1  
 Cysteine--tRNA ligase, cytoplasmic OS=Homo sapiens GN=CARS PE=4 SV=1  
 Coatomer subunit gamma-2 OS=Homo sapiens GN=COPG2 PE=4 SV=1  
 Serine/threonine-protein phosphatase (Fragment) OS=Homo sapiens GN=PPP1CA PE=3 SV=1

|                             |        |   |   |   |
|-----------------------------|--------|---|---|---|
| tr F5H4L7 F5H4L7_HUMAN      | 37 kDa | 3 | 0 | 0 |
| tr F8W720 F8W720_HUMAN      | 66 kDa | 2 | 0 | 0 |
| tr F8VP00 F8VP00_HUMAN      | 19 kDa | 0 | 2 | 0 |
| tr B0QYG7 B0QYG7_HUMAN (+1) | 18 kDa | 2 | 0 | 0 |
| tr E9PK14 E9PK14_HUMAN      | 71 kDa | 0 | 0 | 2 |
| tr C9J7S3 C9J7S3_HUMAN (+1) | 20 kDa | 2 | 0 | 0 |
| tr B4DN60 B4DN60_HUMAN      | 35 kDa | 2 | 0 | 0 |
| tr HOYLE5 HOYLE5_HUMAN      | 22 kDa | 2 | 0 | 0 |
| tr HOYM50 HOYM50_HUMAN      | 28 kDa | 0 | 3 | 0 |
| tr E5RFJ3 E5RFJ3_HUMAN (+2) | 18 kDa | 0 | 0 | 2 |
| tr B5LY68 B5LY68_HUMAN      | 42 kDa | 2 | 0 | 0 |
| tr E9PLI8 E9PLI8_HUMAN      | 26 kDa | 0 | 0 | 0 |
| tr E9PLP0 E9PLP0_HUMAN      | 14 kDa | 2 | 0 | 0 |
| tr F6X838 F6X838_HUMAN      | 28 kDa | 0 | 0 | 2 |
| tr E9PMD7 E9PMD7_HUMAN      | 29 kDa | 2 | 0 | 0 |

Identified Proteins (942)

|                                                                                                                                           | Accession Number                | Molecular W | GST | GppNHp | Galpha2-GDF | Galpha2-Gpp |
|-------------------------------------------------------------------------------------------------------------------------------------------|---------------------------------|-------------|-----|--------|-------------|-------------|
| GST-part                                                                                                                                  | GST                             | 26 kDa      | 124 | 133    | 136         | 136         |
| Guanine nucleotide binding protein (G protein), alpha inhibiting activity polypeptide 2, isoform CRA_c OS=Homo sapiens GN=GNAI2 PE=2 SV=1 | tr B4E2X5 B4E2X5_HUMAN          | 35 kDa      | 13  | 138    | 143         | 143         |
| Ras-related C3 botulinum toxin substrate 2 (Fragment) OS=Homo sapiens GN=RAC2 PE=3 SV=1                                                   | tr B1AH78 B1AH78_HUMAN          | 19 kDa      | 8   | 12     | 17          | 17          |
| Guanine nucleotide-binding protein G(t) subunit alpha-3 OS=Homo sapiens GN=GNAT3 PE=2 SV=2                                                | sp A8MTJ3 GNAT3_HUMAN           | 40 kDa      | 0   | 3      | 3           | 3           |
| Trypsin precursor                                                                                                                         | gi 136429 sp P00761 TRYP_PIG    | 24 kDa      | 16  | 14     | 12          | 12          |
| Glutathione S-transferase P OS=Homo sapiens GN=GSTP1 PE=3 SV=1                                                                            | tr A8MX94 A8MX94_HUMAN          | 19 kDa      | 18  | 14     | 14          | 14          |
| POTE ankyrin domain family member F OS=Homo sapiens GN=POTEF PE=1 SV=2                                                                    | sp A5A3E0 POTEF_HUMAN           | 121 kDa     | 26  | 20     | 21          | 21          |
| Coronin OS=Homo sapiens GN=CORO1A PE=3 SV=1                                                                                               | tr H3BRY3 H3BRY3_HUMAN          | 43 kDa      | 35  | 17     | 19          | 19          |
| Ras GTPase-activating protein 3 OS=Homo sapiens GN=RASA3 PE=2 SV=1                                                                        | tr F8W6X8 F8W6X8_HUMAN          | 92 kDa      | 2   | 38     | 56          | 56          |
| Actin, alpha skeletal muscle OS=Homo sapiens GN=ACTA1 PE=3 SV=2                                                                           | tr A6NL76 A6NL76_HUMAN          | 32 kDa      | 18  | 14     | 17          | 17          |
| Glutathione S-transferase Mu 1 OS=Homo sapiens GN=GSTM1 PE=4 SV=1                                                                         | tr B9ZVX7 B9ZVX7_HUMAN          | 17 kDa      | 8   | 12     | 13          | 13          |
| Ankyrin repeat and BTB/POZ domain-containing protein BTBD11 OS=Homo sapiens GN=BTBD11 PE=2 SV=3                                           | sp A6QL63 BTBDB_HUMAN           | 121 kDa     | 0   | 49     | 46          | 46          |
| Serum albumin OS=Homo sapiens GN=ALB PE=4 SV=1                                                                                            | tr D6RHD5 D6RHD5_HUMAN (+1)     | 52 kDa      | 7   | 10     | 9           | 9           |
| Heat shock cognate 71 kDa protein OS=Homo sapiens GN=HSPA8 PE=3 SV=1                                                                      | tr E9PKE3 E9PKE3_HUMAN          | 69 kDa      | 37  | 33     | 37          | 37          |
| RAP1, GTP-GDP dissociation stimulator 1, isoform CRA_b OS=Homo sapiens GN=RAP1GDS1 PE=4 SV=1                                              | tr G5E9P9 G5E9P9_HUMAN          | 66 kDa      | 0   | 0      | 0           | 0           |
| Tubulin beta chain OS=Homo sapiens GN=TUBB PE=3 SV=1                                                                                      | tr F8VYX6 F8VYX6_HUMAN          | 48 kDa      | 20  | 42     | 48          | 48          |
| Ras-related C3 botulinum toxin substrate 2 OS=Homo sapiens GN=RAC2 PE=3 SV=1                                                              | tr B1AH80 B1AH80_HUMAN          | 21 kDa      | 0   | 2      | 0           | 0           |
| Filamin-A OS=Homo sapiens GN=FLNA PE=4 SV=2                                                                                               | tr E9PHF0 E9PHF0_HUMAN          | 83 kDa      | 38  | 44     | 36          | 36          |
| Guanylate kinase (Fragment) OS=Homo sapiens GN=GUK1 PE=4 SV=1                                                                             | tr B1ANH2 B1ANH2_HUMAN          | 28 kDa      | 0   | 0      | 3           | 3           |
| Ras GTPase-activating-like protein IQGAP1 OS=Homo sapiens GN=IQGAP1 PE=4 SV=1                                                             | tr HOYLE8 HOYLE8_HUMAN          | 125 kDa     | 19  | 26     | 22          | 22          |
| Tubulin alpha-4A chain OS=Homo sapiens GN=TUBA4A PE=2 SV=1                                                                                | tr A8MUB1 A8MUB1_HUMAN          | 48 kDa      | 13  | 28     | 29          | 29          |
| Actinin alpha 1 isoform 3 OS=Homo sapiens GN=ACTN1 PE=2 SV=1                                                                              | tr B7TY16 B7TY16_HUMAN          | 107 kDa     | 43  | 30     | 33          | 33          |
| Carbonyl reductase 1, isoform CRA_c OS=Homo sapiens GN=CBR1 PE=2 SV=1                                                                     | tr B4DFK7 B4DFK7_HUMAN          | 19 kDa      | 9   | 10     | 9           | 9           |
| Actin, cytoplasmic 1 (Fragment) OS=Homo sapiens GN=ACTB PE=3 SV=1                                                                         | tr E7EVS6 E7EVS6_HUMAN          | 18 kDa      | 14  | 12     | 12          | 12          |
| 14-3-3 protein zeta/delta (Fragment) OS=Homo sapiens GN=YWHAZ PE=3 SV=1                                                                   | tr E7EX29 E7EX29_HUMAN          | 28 kDa      | 9   | 21     | 27          | 27          |
| Actin-related protein 2 OS=Homo sapiens GN=ACTR2 PE=3 SV=1                                                                                | tr E9PF41 E9PF41_HUMAN          | 45 kDa      | 20  | 18     | 16          | 16          |
| Filamin-A (Fragment) OS=Homo sapiens GN=FLNA PE=4 SV=2                                                                                    | tr F8WE98 F8WE98_HUMAN          | 67 kDa      | 18  | 18     | 18          | 18          |
| Glyceraldehyde-3-phosphate dehydrogenase OS=Homo sapiens GN=GAPDH PE=3 SV=1                                                               | tr E7EUT4 E7EUT4_HUMAN          | 32 kDa      | 2   | 10     | 19          | 19          |
| Ras-related protein Rap-1b (Fragment) OS=Homo sapiens GN=RAP1B PE=4 SV=1                                                                  | tr E7ESV4 E7ESV4_HUMAN (+1)     | 18 kDa      | 4   | 21     | 17          | 17          |
| C4b-B OS=Homo sapiens GN=C4B PE=4 SV=1                                                                                                    | tr F8VNV9 F8VNV9_HUMAN          | 188 kDa     | 2   | 2      | 2           | 2           |
| Spectrin alpha chain, non-erythrocytic 1 OS=Homo sapiens GN=SPTAN1 PE=4 SV=2                                                              | tr A6NG51 A6NG51_HUMAN          | 285 kDa     | 24  | 38     | 25          | 25          |
| Cofilin-1 OS=Homo sapiens GN=CFL1 PE=4 SV=1                                                                                               | tr E9PK25 E9PK25_HUMAN          | 23 kDa      | 15  | 15     | 17          | 17          |
| Rho-related GTP-binding protein RhoC (Fragment) OS=Homo sapiens GN=RHOC PE=3 SV=1                                                         | tr E9PN11 E9PN11_HUMAN          | 25 kDa      | 3   | 11     | 26          | 26          |
| Keratin, type II cytoskeletal 5 (Fragment) OS=Homo sapiens GN=KRT5 PE=4 SV=1                                                              | tr F8WOC6 F8WOC6_HUMAN          | 21 kDa      | 10  | 2      | 7           | 7           |
| Disks large homolog 1 OS=Homo sapiens GN=DLG1 PE=4 SV=1                                                                                   | tr E7EWL7 E7EWL7_HUMAN          | 88 kDa      | 0   | 0      | 0           | 0           |
| Obscurin OS=Homo sapiens GN=OBSCN PE=4 SV=1                                                                                               | REVtr H3BPX2 H3BPX2_HUMAN       | 946 kDa     | 2   | 0      | 0           | 0           |
| HEAT repeat-containing protein 5A OS=Homo sapiens GN=HEATR5A PE=4 SV=1                                                                    | tr F5H619 F5H619_HUMAN          | 223 kDa     | 2   | 2      | 0           | 0           |
| Pyruvate kinase (Fragment) OS=Homo sapiens GN=PKM PE=3 SV=1                                                                               | tr H3BTN5 H3BTN5_HUMAN          | 53 kDa      | 19  | 6      | 8           | 8           |
| Synaptic vesicle membrane protein VAT-1 homolog OS=Homo sapiens GN=VAT1 PE=2 SV=1                                                         | tr B4DPX4 B4DPX4_HUMAN          | 35 kDa      | 5   | 11     | 10          | 10          |
| Actin, gamma-enteric smooth muscle OS=Homo sapiens GN=ACTG2 PE=3 SV=1                                                                     | tr E9PG30 E9PG30_HUMAN          | 37 kDa      | 2   | 0      | 2           | 2           |
| Prohibitin OS=Homo sapiens GN=PHB PE=2 SV=1                                                                                               | tr B4DY47 B4DY47_HUMAN          | 17 kDa      | 0   | 0      | 0           | 0           |
| Fructose-bisphosphate aldolase OS=Homo sapiens GN=ALDOA PE=3 SV=1                                                                         | tr H3BQN4 H3BQN4_HUMAN          | 39 kDa      | 18  | 14     | 18          | 18          |
| Nesprin-1 OS=Homo sapiens GN=SYNE1 PE=4 SV=1                                                                                              | tr E9PEL9 E9PEL9_HUMAN          | 1005 kDa    | 2   | 0      | 0           | 0           |
| Isoform 3 of Laminin subunit beta-4 OS=Homo sapiens GN=LAMB4                                                                              | REVsp A4D0S4-3 LAMB4_HUMAN (+1) | 189 kDa     | 0   | 0      | 2           | 2           |
| Myosin-10 OS=Homo sapiens GN=MYH10 PE=4 SV=1                                                                                              | tr F8VTL3 F8VTL3_HUMAN (+1)     | 233 kDa     | 16  | 12     | 11          | 11          |
| Tropomyosin alpha-3 chain OS=Homo sapiens GN=TPM3 PE=4 SV=1                                                                               | tr D6R904 D6R904_HUMAN          | 11 kDa      | 14  | 8      | 9           | 9           |
| DNA damage-binding protein 1 OS=Homo sapiens GN=DDB1 PE=4 SV=1                                                                            | tr F5GY55 F5GY55_HUMAN          | 122 kDa     | 10  | 12     | 22          | 22          |
| Ras GTPase-activating-like protein IQGAP2 (Fragment) OS=Homo sapiens GN=IQGAP2 PE=4 SV=1                                                  | tr E7EWC2 E7EWC2_HUMAN          | 160 kDa     | 4   | 2      | 3           | 3           |
| Collagen alpha-3(VI) chain OS=Homo sapiens GN=COL6A3 PE=4 SV=1                                                                            | REVtr E7ENL6 E7ENL6_HUMAN       | 322 kDa     | 2   | 0      | 0           | 0           |
| ATP-binding cassette sub-family A member 2 OS=Homo sapiens GN=ABCA2 PE=3 SV=1                                                             | tr E7EU84 E7EU84_HUMAN          | 223 kDa     | 2   | 0      | 0           | 0           |
| Keratin, type II cytoskeletal 5 (Fragment) OS=Homo sapiens GN=KRT5 PE=3 SV=1                                                              | tr HOYI76 HOYI76_HUMAN          | 23 kDa      | 7   | 4      | 5           | 5           |
| Probable ATP-dependent RNA helicase DDX17 OS=Homo sapiens GN=DDX17 PE=3 SV=1                                                              | tr H3BLZ8 H3BLZ8_HUMAN          | 80 kDa      | 14  | 13     | 12          | 12          |
| Talin-2 (Fragment) OS=Homo sapiens GN=TLN2 PE=4 SV=1                                                                                      | tr HOYMT1 HOYMT1_HUMAN          | 155 kDa     | 7   | 7      | 7           | 7           |
| Heat shock 70 kDa protein 1A/1B OS=Homo sapiens GN=HSPA1B PE=3 SV=1                                                                       | tr F8VZJ4 F8VZJ4_HUMAN          | 68 kDa      | 10  | 11     | 7           | 7           |

|                                                                                                                    |                                 |         |    |    |    |
|--------------------------------------------------------------------------------------------------------------------|---------------------------------|---------|----|----|----|
| Keratin, type II cytoskeletal 1b OS=Homo sapiens GN=KRT77 PE=3 SV=1                                                | tr F5GY66 F5GY66_HUMAN          | 38 kDa  | 2  | 0  | 0  |
| Capping protein (Actin filament) muscle Z-line, beta OS=Homo sapiens GN=CAPZB PE=4 SV=1                            | tr B1AK87 B1AK87_HUMAN (+1)     | 29 kDa  | 10 | 12 | 12 |
| Plastin-3 OS=Homo sapiens GN=PLS3 PE=2 SV=1                                                                        | tr B4DGB4 B4DGB4_HUMAN (+2)     | 69 kDa  | 11 | 5  | 3  |
| Myosin-14 OS=Homo sapiens GN=MYH14 PE=4 SV=1                                                                       | tr G8JLL9 G8JLL9_HUMAN          | 232 kDa | 9  | 4  | 6  |
| Tubulin alpha-1C chain OS=Homo sapiens GN=TUBA1C PE=3 SV=1                                                         | tr F5H5D3 F5H5D3_HUMAN          | 58 kDa  | 5  | 6  | 7  |
| Actin-related protein 3 OS=Homo sapiens GN=ACTR3 PE=2 SV=1                                                         | tr B4DXW1 B4DXW1_HUMAN          | 42 kDa  | 18 | 8  | 10 |
| Peptidyl-prolyl cis-trans isomerase OS=Homo sapiens GN=PPIA PE=3 SV=1                                              | tr C9J5S7 C9J5S7_HUMAN (+1)     | 13 kDa  | 10 | 10 | 14 |
| Long-chain-fatty-acid--CoA ligase 4 (Fragment) OS=Homo sapiens GN=ACSL4 PE=4 SV=1                                  | tr HOY9A0 HOY9A0_HUMAN          | 17 kDa  | 0  | 16 | 12 |
| Coiled-coil domain-containing protein 88B OS=Homo sapiens GN=CCDC88B PE=1 SV=1                                     | sp A6NC98 CC88B_HUMAN           | 165 kDa | 0  | 0  | 2  |
| Gelsolin OS=Homo sapiens GN=GSN PE=4 SV=1                                                                          | tr F5H1A8 F5H1A8_HUMAN          | 81 kDa  | 14 | 8  | 8  |
| Microtubule-actin cross-linking factor 1, isoforms 1/2/3/5 OS=Homo sapiens GN=MACF1 PE=4 SV=1                      | tr H3BQK9 H3BQK9_HUMAN          | 861 kDa | 2  | 0  | 2  |
| Junction plakoglobin OS=Homo sapiens GN=JUP PE=3 SV=1                                                              | tr F5GWP8 F5GWP8_HUMAN          | 66 kDa  | 5  | 0  | 2  |
| Ezrin OS=Homo sapiens GN=EZR PE=4 SV=2                                                                             | tr E7EQR4 E7EQR4_HUMAN          | 66 kDa  | 13 | 8  | 6  |
| Transketolase OS=Homo sapiens GN=TKT PE=4 SV=1                                                                     | tr E7EPA7 E7EPA7_HUMAN          | 69 kDa  | 20 | 10 | 10 |
| Protein FAM65B OS=Homo sapiens GN=FAM65B PE=4 SV=1                                                                 | tr F5GX51 F5GX51_HUMAN          | 116 kDa | 0  | 4  | 14 |
| Annexin (Fragment) OS=Homo sapiens GN=ANXA2 PE=3 SV=1                                                              | tr HOYMD0 HOYMD0_HUMAN (+2)     | 25 kDa  | 13 | 15 | 16 |
| Actin-related protein 2/3 complex subunit 4 OS=Homo sapiens GN=ARPC4 PE=4 SV=1                                     | tr F8WCF6 F8WCF6_HUMAN          | 21 kDa  | 8  | 6  | 7  |
| LanC-like protein 1 (Fragment) OS=Homo sapiens GN=LANCL1 PE=4 SV=1                                                 | tr E9PHS0 E9PHS0_HUMAN          | 22 kDa  | 7  | 4  | 4  |
| Phosphoglycerate kinase OS=Homo sapiens GN=PGK1 PE=2 SV=1                                                          | tr B7Z7A9 B7Z7A9_HUMAN          | 41 kDa  | 17 | 14 | 11 |
| RAS p21 protein activator 2, isoform CRA_b OS=Homo sapiens GN=RASA2 PE=4 SV=1                                      | tr G3V0F9 G3V0F9_HUMAN          | 97 kDa  | 0  | 9  | 29 |
| Long-chain-fatty-acid--CoA ligase 1 OS=Homo sapiens GN=ACSL1 PE=4 SV=1                                             | tr E7EPM6 E7EPM6_HUMAN          | 74 kDa  | 0  | 15 | 14 |
| Collagen alpha-6(IV) chain OS=Homo sapiens GN=COL4A6 PE=4 SV=1                                                     | REVtr A8MXH5 A8MXH5_HUMAN       | 165 kDa | 0  | 2  | 2  |
| Inter-alpha-trypsin inhibitor heavy chain H3 OS=Homo sapiens GN=ITIH3 PE=4 SV=1                                    | tr E7ET33 E7ET33_HUMAN          | 78 kDa  | 0  | 0  | 2  |
| Vimentin OS=Homo sapiens GN=VIM PE=3 SV=1                                                                          | tr B0YJC4 B0YJC4_HUMAN          | 50 kDa  | 9  | 10 | 14 |
| Synembryn-A (Fragment) OS=Homo sapiens GN=RIC8A PE=4 SV=1                                                          | tr HOYEN0 HOYEN0_HUMAN          | 32 kDa  | 0  | 5  | 4  |
| T-complex protein 1 subunit gamma OS=Homo sapiens GN=CCT3 PE=2 SV=1                                                | tr B4DUR8 B4DUR8_HUMAN          | 56 kDa  | 7  | 2  | 2  |
| LIM and SH3 domain protein 1 (Fragment) OS=Homo sapiens GN=LASP1 PE=4 SV=1                                         | tr C9J9W2 C9J9W2_HUMAN          | 19 kDa  | 7  | 6  | 5  |
| Dynein heavy chain 8, axonemal OS=Homo sapiens GN=DNAH8 PE=4 SV=1                                                  | REVtr HOY7V4 HOY7V4_HUMAN       | 479 kDa | 2  | 2  | 0  |
| Structural maintenance of chromosomes protein 1A OS=Homo sapiens GN=SMC1A PE=4 SV=1                                | tr G8JLG1 G8JLG1_HUMAN          | 59 kDa  | 12 | 12 | 7  |
| Fermitin family homolog 3 (Fragment) OS=Homo sapiens GN=FERMT3 PE=4 SV=1                                           | tr F5H1C6 F5H1C6_HUMAN          | 33 kDa  | 8  | 5  | 6  |
| Heterogeneous nuclear ribonucleoprotein A1 OS=Homo sapiens GN=HNRNPA1 PE=4 SV=1                                    | tr F8VXY0 F8VXY0_HUMAN          | 33 kDa  | 5  | 11 | 8  |
| Ras-related protein Rab-8A OS=Homo sapiens GN=RAB8A PE=2 SV=1                                                      | tr B4DEK7 B4DEK7_HUMAN          | 24 kDa  | 0  | 6  | 6  |
| Extracellular signal-regulated kinase-2 splice variant OS=Homo sapiens GN=MAPK1 PE=2 SV=1                          | tr A8CZ64 A8CZ64_HUMAN          | 36 kDa  | 9  | 14 | 8  |
| Isoform 2 of Collagen alpha-5(VI) chain OS=Homo sapiens GN=COL6A5                                                  | REVsp A8TX70-2 CO6A5_HUMAN (+3) | 280 kDa | 2  | 0  | 0  |
| Putative Polycomb group protein ASXL2 OS=Homo sapiens GN=ASXL2 PE=4 SV=1                                           | REVtr E7EWD6 E7EWD6_HUMAN       | 150 kDa | 0  | 0  | 2  |
| CUB and sushi domain-containing protein 1 OS=Homo sapiens GN=CSMD1 PE=4 SV=1                                       | tr E5RIG2 E5RIG2_HUMAN (+1)     | 389 kDa | 0  | 4  | 0  |
| L-lactate dehydrogenase (Fragment) OS=Homo sapiens GN=LDHB PE=3 SV=1                                               | tr A8MW50 A8MW50_HUMAN          | 25 kDa  | 11 | 4  | 6  |
| Dedicator of cytokinesis protein 2 OS=Homo sapiens GN=DOCK2 PE=4 SV=1                                              | tr E7ERW7 E7ERW7_HUMAN          | 153 kDa | 0  | 13 | 7  |
| SAM domain and HD domain-containing protein 1 OS=Homo sapiens GN=SAMHD1 PE=2 SV=2                                  | tr A6NDZ3 A6NDZ3_HUMAN          | 20 kDa  | 0  | 5  | 0  |
| Uncharacterized protein OS=Homo sapiens GN=VCL PE=2 SV=1                                                           | tr B4DTM7 B4DTM7_HUMAN          | 36 kDa  | 7  | 6  | 7  |
| DOCK10.2 OS=Homo sapiens GN=DOCK10.2 PE=2 SV=2                                                                     | tr B3FL70 B3FL70_HUMAN          | 249 kDa | 2  | 0  | 2  |
| Cell division control protein 42 homolog OS=Homo sapiens GN=CDC42 PE=3 SV=1                                        | tr E7ETU3 E7ETU3_HUMAN          | 27 kDa  | 2  | 9  | 8  |
| Caldesmon OS=Homo sapiens GN=CALD1 PE=4 SV=1                                                                       | tr E7EX44 E7EX44_HUMAN (+1)     | 64 kDa  | 8  | 10 | 5  |
| Mucin-19 (Fragment) OS=Homo sapiens GN=MUC19 PE=4 SV=1                                                             | tr C9JCE7 C9JCE7_HUMAN          | 175 kDa | 0  | 2  | 0  |
| T-complex protein 1 subunit zeta OS=Homo sapiens GN=CCT6A PE=2 SV=1                                                | tr B4DPJ8 B4DPJ8_HUMAN          | 55 kDa  | 5  | 0  | 0  |
| Elongation factor 1-gamma OS=Homo sapiens GN=EEF1G PE=2 SV=1                                                       | tr B4DTG2 B4DTG2_HUMAN          | 56 kDa  | 16 | 6  | 6  |
| Tumor necrosis factor alpha-induced protein 8 OS=Homo sapiens GN=TNFAIP8 PE=4 SV=1                                 | tr D6RCM8 D6RCM8_HUMAN          | 23 kDa  | 0  | 2  | 14 |
| Heat shock protein HSP 90-alpha (Fragment) OS=Homo sapiens GN=HSP90AA1 PE=4 SV=1                                   | tr G3V2J8 G3V2J8_HUMAN          | 20 kDa  | 6  | 6  | 6  |
| Plastin-2 OS=Homo sapiens GN=LCP1 PE=2 SV=1                                                                        | tr B4DUA0 B4DUA0_HUMAN          | 22 kDa  | 5  | 3  | 4  |
| Actin-related protein 2/3 complex subunit 3 (Fragment) OS=Homo sapiens GN=ARPC3 PE=4 SV=1                          | tr C9JZD1 C9JZD1_HUMAN          | 12 kDa  | 3  | 6  | 5  |
| Phosphorylase OS=Homo sapiens GN=PYGL PE=3 SV=1                                                                    | tr E9PK47 E9PK47_HUMAN          | 94 kDa  | 6  | 10 | 12 |
| WD repeat-containing protein 1 (Fragment) OS=Homo sapiens GN=WDR1 PE=4 SV=1                                        | tr D6RD66 D6RD66_HUMAN          | 27 kDa  | 12 | 3  | 0  |
| Cytoplasmic FMR1-interacting protein 2 OS=Homo sapiens GN=CYFIP2 PE=4 SV=1                                         | tr E7EVF4 E7EVF4_HUMAN (+1)     | 146 kDa | 11 | 7  | 6  |
| Amyotrophic lateral sclerosis 2 chromosomal region candidate gene 11 protein OS=Homo sapiens GN=ALS2CR11 PE=4 SV=1 | REVtr E9PGG4 E9PGG4_HUMAN       | 209 kDa | 0  | 0  | 2  |
| Spectrin alpha chain, non-erythrocytic 1 OS=Homo sapiens GN=SPTAN1 PE=4 SV=2                                       | REVtr A6NGS1 A6NGS1_HUMAN       | 285 kDa | 2  | 0  | 2  |

|                                                                                                         |                             |          |    |    |    |
|---------------------------------------------------------------------------------------------------------|-----------------------------|----------|----|----|----|
| Mucin-16 OS=Homo sapiens GN=MUC16 PE=4 SV=2                                                             | tr B5ME49 B5ME49_HUMAN      | 1519 kDa | 2  | 0  | 0  |
| Interferon alpha/beta receptor 2 (Fragment) OS=Homo sapiens GN=IFNAR2 PE=4 SV=1                         | REVtr C9JCU0 C9JCU0_HUMAN   | 26 kDa   | 0  | 2  | 0  |
| Eukaryotic translation initiation factor 4B OS=Homo sapiens GN=EIF4B PE=4 SV=1                          | tr E7EX17 E7EX17_HUMAN      | 70 kDa   | 5  | 2  | 0  |
| Rho GTPase-activating protein 1 (Fragment) OS=Homo sapiens GN=ARHGAP1 PE=4 SV=1                         | tr H0YE29 H0YE29_HUMAN      | 38 kDa   | 0  | 5  | 13 |
| Protein phosphatase 1 regulatory subunit 12A (Fragment) OS=Homo sapiens GN=PPP1R12A PE=4 SV=1           | tr F8VZN8 F8VZN8_HUMAN      | 77 kDa   | 8  | 4  | 5  |
| Long-chain-fatty-acid-CoA ligase 4 (Fragment) OS=Homo sapiens GN=ACSL4 PE=4 SV=1                        | tr D6RF95 D6RF95_HUMAN      | 17 kDa   | 0  | 11 | 11 |
| Choline-phosphate cytidyltransferase A OS=Homo sapiens GN=PCYT1A PE=4 SV=1                              | tr C9JEJ2 C9JEJ2_HUMAN      | 43 kDa   | 0  | 11 | 10 |
| Nesprin-2 OS=Homo sapiens GN=SYNE2 PE=4 SV=1                                                            | tr G3V5X4 G3V5X4_HUMAN      | 788 kDa  | 2  | 0  | 0  |
| Leukotriene A-4 hydrolase OS=Homo sapiens GN=LTA4H PE=4 SV=1                                            | tr F8VV40 F8VV40_HUMAN      | 67 kDa   | 12 | 2  | 0  |
| Coatomer protein complex, subunit beta 2 (Beta prime), isoform CRA_b OS=Homo sapiens GN=COPB2 PE=2 SV=1 | tr B4DZ18 B4DZ18_HUMAN      | 99 kDa   | 6  | 5  | 8  |
| Actin-related protein 2/3 complex subunit 1B OS=Homo sapiens GN=ARPC1B PE=4 SV=1                        | tr F8WCG3 F8WCG3_HUMAN      | 25 kDa   | 10 | 6  | 4  |
| MLL cleavage product C180 OS=Homo sapiens GN=MLL PE=4 SV=1                                              | REVtr E9PQG7 E9PQG7_HUMAN   | 432 kDa  | 2  | 0  | 0  |
| Histone-lysine N-methyltransferase MLL3 (Fragment) OS=Homo sapiens GN=MLL3 PE=4 SV=1                    | REVtr H7BY37 H7BY37_HUMAN   | 270 kDa  | 0  | 2  | 0  |
| Keratin, type II cytoskeletal 5 (Fragment) OS=Homo sapiens GN=KRT5 PE=4 SV=1                            | tr F8VV57 F8VV57_HUMAN      | 12 kDa   | 3  | 2  | 2  |
| 6-phosphogluconate dehydrogenase, decarboxylating OS=Homo sapiens GN=PGD PE=2 SV=1                      | tr B4DQJ8 B4DQJ8_HUMAN      | 52 kDa   | 11 | 7  | 5  |
| Ras-related protein Rab-7a (Fragment) OS=Homo sapiens GN=RAB7A PE=3 SV=1                                | tr C9J592 C9J592_HUMAN      | 17 kDa   | 0  | 7  | 8  |
| ATP-dependent RNA helicase DDX3Y OS=Homo sapiens GN=DDX3Y PE=2 SV=1                                     | tr B4DXX7 B4DXX7_HUMAN      | 73 kDa   | 5  | 9  | 8  |
| LIM domain only protein 7 OS=Homo sapiens GN=LMO7 PE=4 SV=1                                             | tr F8WD26 F8WD26_HUMAN      | 185 kDa  | 0  | 0  | 2  |
| Ras-related protein Rab-11A OS=Homo sapiens GN=RAB11A PE=3 SV=1                                         | tr H3BSC1 H3BSC1_HUMAN      | 22 kDa   | 0  | 6  | 8  |
| Serine/threonine-protein phosphatase OS=Homo sapiens GN=PPP1CA PE=3 SV=1                                | tr A6NNR3 A6NNR3_HUMAN      | 33 kDa   | 8  | 6  | 6  |
| LVV-hemorphin-7 (Fragment) OS=Homo sapiens GN=HBB PE=3 SV=1                                             | tr F8W6P5 F8W6P5_HUMAN      | 10 kDa   | 3  | 3  | 2  |
| Pro-interleukin-16 (Fragment) OS=Homo sapiens GN=IL16 PE=4 SV=1                                         | tr H3BVH5 H3BVH5_HUMAN      | 130 kDa  | 5  | 6  | 4  |
| Nucleoporin p58/p45 OS=Homo sapiens GN=NUPL1 PE=4 SV=1                                                  | REVtr A6N112 A6N112_HUMAN   | 60 kDa   | 0  | 2  | 0  |
| Ankyrin repeat and SAM domain-containing protein 1A OS=Homo sapiens GN=ANKS1A PE=2 SV=1                 | tr B4DQW8 B4DQW8_HUMAN      | 34 kDa   | 2  | 4  | 2  |
| SPOC domain-containing protein 1 OS=Homo sapiens GN=SPOCD1 PE=4 SV=1                                    | tr E9PPM7 E9PPM7_HUMAN      | 71 kDa   | 0  | 0  | 0  |
| Citron Rho-interacting kinase (Fragment) OS=Homo sapiens GN=CIT PE=4 SV=1                               | tr H7BYJ3 H7BYJ3_HUMAN      | 187 kDa  | 0  | 0  | 0  |
| Non-POU domain-containing octamer-binding protein OS=Homo sapiens GN=NONO PE=4 SV=1                     | tr F5GYZ3 F5GYZ3_HUMAN      | 44 kDa   | 7  | 0  | 0  |
| Ras-related protein Rab-1A OS=Homo sapiens GN=RAB1A PE=3 SV=1                                           | tr E7END7 E7END7_HUMAN      | 19 kDa   | 0  | 5  | 6  |
| Elongation factor 1-alpha 1 (Fragment) OS=Homo sapiens GN=EEF1A1 PE=4 SV=1                              | tr A6PW80 A6PW80_HUMAN      | 12 kDa   | 3  | 4  | 5  |
| ATP-citrate synthase OS=Homo sapiens GN=ACLY PE=2 SV=1                                                  | tr B4E3P0 B4E3P0_HUMAN      | 91 kDa   | 7  | 7  | 8  |
| Signal peptide, CUB and EGF-like domain-containing protein 2 OS=Homo sapiens GN=SCUBE2 PE=4 SV=1        | REVtr E7EQD6 E7EQD6_HUMAN   | 113 kDa  | 0  | 4  | 0  |
| Nebulin OS=Homo sapiens GN=NEB PE=4 SV=1                                                                | REVtr F8WCPO F8WCPO_HUMAN   | 987 kDa  | 0  | 2  | 0  |
| Enolase (Fragment) OS=Homo sapiens GN=ENO3 PE=3 SV=1                                                    | tr E5RGZ4 E5RGZ4_HUMAN      | 30 kDa   | 8  | 6  | 6  |
| Dynein heavy chain 8, axonemal OS=Homo sapiens GN=DNAH8 PE=4 SV=1                                       | tr H0Y7V4 H0Y7V4_HUMAN      | 479 kDa  | 0  | 2  | 0  |
| Keratin, type II cytoskeletal 4 OS=Homo sapiens GN=KRT4 PE=3 SV=1                                       | tr F5H8K9 F5H8K9_HUMAN      | 54 kDa   | 3  | 0  | 0  |
| Heat shock protein HSP 90-beta (Fragment) OS=Homo sapiens GN=HSP90AB1 PE=4 SV=1                         | tr H0Y6E4 H0Y6E4_HUMAN      | 17 kDa   | 6  | 2  | 3  |
| Coronin OS=Homo sapiens GN=CORO7 PE=2 SV=1                                                              | tr B3KSY4 B3KSY4_HUMAN      | 77 kDa   | 3  | 3  | 4  |
| Dynamin-2 OS=Homo sapiens GN=DNM2 PE=3 SV=1                                                             | tr F5H4R9 F5H4R9_HUMAN      | 98 kDa   | 10 | 4  | 9  |
| Calponin-2 OS=Homo sapiens GN=CNN2 PE=2 SV=1                                                            | tr B4DDF4 B4DDF4_HUMAN      | 33 kDa   | 4  | 4  | 7  |
| Hematopoietic lineage cell-specific protein OS=Homo sapiens GN=HCLS1 PE=4 SV=1                          | tr E7EVW7 E7EVW7_HUMAN      | 50 kDa   | 5  | 5  | 5  |
| Homer protein homolog 3 OS=Homo sapiens GN=HOMER3 PE=4 SV=1                                             | tr E9PCW9 E9PCW9_HUMAN      | 36 kDa   | 0  | 10 | 9  |
| Lamin-B1 OS=Homo sapiens GN=LMNB1 PE=3 SV=1                                                             | tr E9PBF6 E9PBF6_HUMAN      | 45 kDa   | 0  | 10 | 9  |
| High mobility group protein B2 (Fragment) OS=Homo sapiens GN=HMGB2 PE=4 SV=1                            | tr D6R9A6 D6R9A6_HUMAN      | 15 kDa   | 2  | 5  | 5  |
| Eukaryotic initiation factor 4A-II OS=Homo sapiens GN=EIF4A2 PE=3 SV=1                                  | tr E7EQG2 E7EQG2_HUMAN      | 41 kDa   | 11 | 3  | 5  |
| UTP-glucose-1-phosphate uridylyltransferase OS=Homo sapiens GN=UGP2 PE=4 SV=1                           | tr E7EUC7 E7EUC7_HUMAN      | 58 kDa   | 11 | 2  | 0  |
| 14-3-3 protein theta (Fragment) OS=Homo sapiens GN=YWHAQ PE=4 SV=1                                      | tr E9PG15 E9PG15_HUMAN      | 17 kDa   | 2  | 6  | 6  |
| Serine/threonine-protein kinase MARK2 OS=Homo sapiens GN=MARK2 PE=4 SV=2                                | tr E9PC69 E9PC69_HUMAN      | 87 kDa   | 0  | 4  | 3  |
| Rho GTPase-activating protein 32 OS=Homo sapiens GN=ARHGAP32 PE=1 SV=1                                  | sp A7KAX9 RHG32_HUMAN       | 231 kDa  | 0  | 0  | 0  |
| Filamin-A (Fragment) OS=Homo sapiens GN=FLNA PE=4 SV=1                                                  | tr H0Y5F3 H0Y5F3_HUMAN      | 25 kDa   | 3  | 4  | 0  |
| Macrophage-capping protein OS=Homo sapiens GN=CAPG PE=2 SV=1                                            | tr B4DU58 B4DU58_HUMAN      | 36 kDa   | 5  | 5  | 4  |
| Dynamin-1-like protein OS=Homo sapiens GN=DNM1L PE=3 SV=1                                               | tr G8JLD5 G8JLD5_HUMAN      | 80 kDa   | 4  | 0  | 0  |
| Scavenger receptor cysteine-rich type 1 protein M160 OS=Homo sapiens GN=CD163L1 PE=4 SV=1               | tr E7EVK4 E7EVK4_HUMAN      | 160 kDa  | 0  | 2  | 0  |
| DNA-directed RNA polymerase OS=Homo sapiens GN=POLR2B PE=3 SV=2                                         | tr C9J2Y9 C9J2Y9_HUMAN (+1) | 133 kDa  | 0  | 3  | 4  |
| Diaphanous homolog 1 (Drosophila), isoform CRA_a OS=Homo sapiens GN=DIAPH1 PE=4 SV=1                    | tr B9ZVX0 B9ZVX0_HUMAN (+3) | 139 kDa  | 2  | 0  | 8  |
| Transaldolase OS=Homo sapiens GN=TALDO1 PE=3 SV=1                                                       | tr F2Z393 F2Z393_HUMAN      | 35 kDa   | 3  | 3  | 3  |



|                                                                                                                        |                             |         |    |   |   |
|------------------------------------------------------------------------------------------------------------------------|-----------------------------|---------|----|---|---|
| E3 ubiquitin-protein ligase TRIM33 (Fragment) OS=Homo sapiens GN=TRIM33 PE=4 SV=1                                      | tr HOY612 HOY612_HUMAN      | 99 kDa  | 0  | 0 | 2 |
| Mastermind-like protein 3 OS=Homo sapiens GN=MAML3 PE=4 SV=1                                                           | tr E7EVW8 E7EVW8_HUMAN      | 122 kDa | 2  | 0 | 2 |
| AT rich interactive domain 1B (SWI1-like), isoform CRA_a OS=Homo sapiens GN=ARID1B PE=4 SV=1                           | tr G3XAA0 G3XAA0_HUMAN      | 237 kDa | 0  | 4 | 2 |
| Spectrin beta chain, non-erythrocytic 1 (Fragment) OS=Homo sapiens GN=SPTBN1 PE=4 SV=1                                 | tr F8W6C1 F8W6C1_HUMAN      | 81 kDa  | 2  | 6 | 3 |
| Annexin OS=Homo sapiens GN=ANXA4 PE=2 SV=1                                                                             | tr B4DDF9 B4DDF9_HUMAN      | 27 kDa  | 5  | 5 | 6 |
| Rab GDP dissociation inhibitor beta OS=Homo sapiens GN=GDI2 PE=4 SV=1                                                  | tr E7EU23 E7EU23_HUMAN      | 51 kDa  | 14 | 8 | 4 |
| Filamin-B OS=Homo sapiens GN=FLNB PE=4 SV=1                                                                            | tr E7EN95 E7EN95_HUMAN      | 256 kDa | 4  | 2 | 0 |
| Ewing sarcoma breakpoint region 1 OS=Homo sapiens GN=EWSR1 PE=4 SV=1                                                   | tr B0QYK1 B0QYK1_HUMAN      | 63 kDa  | 3  | 6 | 2 |
| Ryanodine receptor 2 OS=Homo sapiens GN=RYP2 PE=4 SV=1                                                                 | REVtr HOYGL9 HOYGL9_HUMAN   | 563 kDa | 0  | 0 | 2 |
| Guanine nucleotide-binding protein G(i)/G(s)/G(t) subunit beta-1 OS=Homo sapiens GN=GNB1 PE=2 SV=1                     | tr B3KVK2 B3KVK2_HUMAN      | 26 kDa  | 0  | 7 | 9 |
| Exportin-2 OS=Homo sapiens GN=CSE1L PE=4 SV=1                                                                          | tr F8W904 F8W904_HUMAN      | 104 kDa | 5  | 7 | 9 |
| Protein disulfide isomerase family A, member 3, isoform CRA_b OS=Homo sapiens GN=PDIA3 PE=3 SV=1                       | tr G5EA52 G5EA52_HUMAN      | 55 kDa  | 10 | 0 | 0 |
| CLIP-associating protein 2 OS=Homo sapiens GN=CLASP2 PE=4 SV=1                                                         | tr E7EW49 E7EW49_HUMAN      | 166 kDa | 0  | 0 | 2 |
| Ras-related protein Rab-5A OS=Homo sapiens GN=RAB5A PE=2 SV=1                                                          | tr B4DJA5 B4DJA5_HUMAN      | 22 kDa  | 0  | 2 | 2 |
| G-protein-signaling modulator 3 OS=Homo sapiens GN=GPM3 PE=4 SV=1                                                      | tr E9PI3 E9PI3_HUMAN        | 18 kDa  | 0  | 4 | 4 |
| Protein RTEL1-TNFRSF6B OS=Homo sapiens GN=RTEL1 PE=4 SV=1                                                              | tr F6WH68 F6WH68_HUMAN      | 153 kDa | 0  | 0 | 0 |
| Ubiquitin-associated protein 2-like OS=Homo sapiens GN=UBAP2L PE=4 SV=1                                                | tr F8W726 F8W726_HUMAN      | 113 kDa | 0  | 0 | 0 |
| Zinc finger protein 521 OS=Homo sapiens GN=ZNF521 PE=4 SV=2                                                            | REVtr H7BYU6 H7BYU6_HUMAN   | 140 kDa | 0  | 3 | 0 |
| Heterogeneous nuclear ribonucleoprotein D0 (Fragment) OS=Homo sapiens GN=HNRNPD PE=4 SV=1                              | tr D6RAF8 D6RAF8_HUMAN      | 23 kDa  | 3  | 5 | 6 |
| Chaperonin containing TCP1, subunit 8 (Theta), isoform CRA_a OS=Homo sapiens GN=CCT8 PE=3 SV=1                         | tr G5E9B2 G5E9B2_HUMAN      | 59 kDa  | 13 | 0 | 0 |
| Beta-parvin OS=Homo sapiens GN=PARVB PE=4 SV=1                                                                         | tr B0QYM8 B0QYM8_HUMAN      | 38 kDa  | 7  | 4 | 5 |
| Tropomyosin 1 (Alpha) isoform 7 OS=Homo sapiens GN=TPM1 PE=3 SV=1                                                      | tr D9YZV8 D9YZV8_HUMAN      | 33 kDa  | 0  | 0 | 3 |
| Actin-related protein 2/3 complex subunit 2 (Fragment) OS=Homo sapiens GN=ARPC2 PE=4 SV=1                              | tr C9JTV5 C9JTV5_HUMAN (+1) | 10 kDa  | 6  | 4 | 8 |
| Exportin-7 OS=Homo sapiens GN=XPO7 PE=4 SV=1                                                                           | tr E9PEN8 E9PEN8_HUMAN      | 125 kDa | 0  | 6 | 5 |
| 6-phosphofructokinase type C OS=Homo sapiens GN=PFKP PE=2 SV=1                                                         | tr B1APP8 B1APP8_HUMAN      | 23 kDa  | 0  | 9 | 3 |
| Ena/VASP-like protein OS=Homo sapiens GN=EVL PE=2 SV=1                                                                 | tr B7Z315 B7Z315_HUMAN      | 42 kDa  | 7  | 3 | 3 |
| 26S proteasome non-ATPase regulatory subunit 2 OS=Homo sapiens GN=PSMD2 PE=4 SV=1                                      | tr E7EW34 E7EW34_HUMAN (+1) | 86 kDa  | 5  | 2 | 6 |
| Coatome subunit beta (Fragment) OS=Homo sapiens GN=COPB1 PE=4 SV=1                                                     | tr E9PP73 E9PP73_HUMAN      | 56 kDa  | 6  | 2 | 5 |
| Collagen alpha-1(III) chain OS=Homo sapiens GN=COL3A1 PE=1 SV=1                                                        | REVtr E7ENY8 E7ENY8_HUMAN   | 112 kDa | 0  | 2 | 0 |
| RNA-binding protein FUS OS=Homo sapiens GN=FUS PE=4 SV=1                                                               | tr H3BPE7 H3BPE7_HUMAN      | 53 kDa  | 2  | 0 | 0 |
| TRIO and F-actin-binding protein OS=Homo sapiens GN=TRIOBP PE=4 SV=1                                                   | tr F8W6V6 F8W6V6_HUMAN      | 74 kDa  | 6  | 6 | 0 |
| ALOX5 protein OS=Homo sapiens GN=ALOX5 PE=2 SV=1                                                                       | tr B7ZLS0 B7ZLS0_HUMAN      | 72 kDa  | 5  | 4 | 7 |
| FRAS1-related extracellular matrix protein 1 OS=Homo sapiens GN=FREM1 PE=4 SV=1                                        | REVtr C9JT55 C9JT55_HUMAN   | 244 kDa | 2  | 0 | 0 |
| Glucose-6-phosphate 1-dehydrogenase (Fragment) OS=Homo sapiens GN=G6PD PE=3 SV=1                                       | tr E7EM57 E7EM57_HUMAN (+1) | 37 kDa  | 4  | 0 | 0 |
| Guanine nucleotide-binding protein G(i)/G(s)/G(t) subunit beta-1 (Fragment) OS=Homo sapiens GN=GNB1 PE=4 SV=1          | tr F6UT28 F6UT28_HUMAN      | 18 kDa  | 0  | 6 | 7 |
| EH domain-containing protein 1 (Fragment) OS=Homo sapiens GN=EHD1 PE=4 SV=1                                            | tr C9JC03 C9JC03_HUMAN      | 43 kDa  | 7  | 0 | 0 |
| Nascent polypeptide-associated complex subunit alpha OS=Homo sapiens GN=NACA PE=4 SV=1                                 | tr E9PAV3 E9PAV3_HUMAN      | 205 kDa | 2  | 0 | 0 |
| HCG1983504, isoform CRA_f OS=Homo sapiens GN=TUBB3 PE=2 SV=1                                                           | tr A8K854 A8K854_HUMAN      | 42 kDa  | 3  | 4 | 4 |
| Annexin OS=Homo sapiens GN=ANXA6 PE=3 SV=3                                                                             | tr A6NN80 A6NN80_HUMAN      | 75 kDa  | 6  | 0 | 2 |
| Coronin OS=Homo sapiens GN=CORO1B PE=3 SV=1                                                                            | tr E7EW44 E7EW44_HUMAN (+1) | 32 kDa  | 9  | 0 | 0 |
| Coronin OS=Homo sapiens GN=CORO1C PE=2 SV=1                                                                            | tr A7MAP1 A7MAP1_HUMAN      | 59 kDa  | 8  | 0 | 0 |
| F-actin-capping protein subunit alpha-2 OS=Homo sapiens GN=CAPZA2 PE=4 SV=1                                            | tr F8W9N7 F8W9N7_HUMAN      | 20 kDa  | 3  | 5 | 5 |
| Alpha actinin 4 short isoform OS=Homo sapiens GN=ACTN4 PE=2 SV=1                                                       | tr D6PKX4 D6PKX4_HUMAN      | 80 kDa  | 11 | 2 | 4 |
| Eukaryotic translation initiation factor 4 gamma 1 OS=Homo sapiens GN=EIF4G1 PE=4 SV=1                                 | tr D3DNT2 D3DNT2_HUMAN      | 176 kDa | 0  | 5 | 4 |
| Minor histocompatibility antigen HA-1 OS=Homo sapiens GN=HMHA1 PE=4 SV=1                                               | tr F5H1R4 F5H1R4_HUMAN      | 112 kDa | 2  | 5 | 6 |
| Serine/threonine-protein phosphatase 2A 65 kDa regulatory subunit A alpha isoform OS=Homo sapiens GN=PPP2R1A PE=4 SV=1 | tr F5H3X9 F5H3X9_HUMAN      | 59 kDa  | 6  | 0 | 5 |
| 6-phosphofructokinase type C (Fragment) OS=Homo sapiens GN=PFKP PE=4 SV=1                                              | tr B1APP6 B1APP6_HUMAN      | 26 kDa  | 0  | 3 | 2 |
| ADP-ribosylation factor 5 (Fragment) OS=Homo sapiens GN=ARF5 PE=3 SV=1                                                 | tr C9J1Z8 C9J1Z8_HUMAN      | 17 kDa  | 3  | 3 | 4 |
| C-myc promoter-binding protein (Fragment) OS=Homo sapiens GN=DENND4A PE=4 SV=1                                         | REVtr H3BTW5 H3BTW5_HUMAN   | 113 kDa | 0  | 2 | 0 |
| DNA repair protein RAD51 homolog 1 OS=Homo sapiens GN=RAD51 PE=4 SV=1                                                  | REVtr E9PI54 E9PI54_HUMAN   | 11 kDa  | 0  | 2 | 0 |
| Sphingomyelin phosphodiesterase 4 OS=Homo sapiens GN=SMPD4 PE=4 SV=1                                                   | tr H7BXF4 H7BXF4_HUMAN      | 95 kDa  | 0  | 2 | 0 |
| Isoleucine--tRNA ligase, mitochondrial OS=Homo sapiens GN=IARS2 PE=3 SV=1                                              | tr F6SBX2 F6SBX2_HUMAN      | 106 kDa | 0  | 0 | 0 |
| Tripartite motif-containing protein 67 OS=Homo sapiens GN=TRIM67 PE=4 SV=1                                             | REVtr F8W8C1 F8W8C1_HUMAN   | 84 kDa  | 0  | 2 | 0 |
| C-1-tetrahydrofolate synthase, cytoplasmic OS=Homo sapiens GN=MTHFD1 PE=3 SV=1                                         | tr F5H2F4 F5H2F4_HUMAN (+1) | 111 kDa | 4  | 0 | 0 |
| V-type proton ATPase subunit B, brain isoform (Fragment) OS=Homo sapiens GN=ATP6V1B2 PE=4 SV=1                         | tr HOYCO4 HOYCO4_HUMAN      | 21 kDa  | 2  | 0 | 0 |

|                                                                                                                 |                                |         |    |    |    |
|-----------------------------------------------------------------------------------------------------------------|--------------------------------|---------|----|----|----|
| Nucleolin (Fragment) OS=Homo sapiens GN=NCL PE=4 SV=1                                                           | tr H7BY16 H7BY16_HUMAN         | 32 kDa  | 4  | 2  | 4  |
| T-complex protein 1 subunit eta OS=Homo sapiens GN=CCT7 PE=3 SV=1                                               | tr B8ZC9 B8ZC9_HUMAN           | 55 kDa  | 7  | 0  | 0  |
| T-complex protein 1 subunit beta OS=Homo sapiens GN=CCT2 PE=3 SV=2                                              | tr F5GWF6 F5GWF6_HUMAN         | 57 kDa  | 8  | 0  | 0  |
| Integrin-linked protein kinase OS=Homo sapiens GN=ILK PE=2 SV=1                                                 | tr B7Z418 B7Z418_HUMAN         | 44 kDa  | 8  | 0  | 2  |
| Heat shock 105kDa/110kDa protein 1, isoform CRA_b OS=Homo sapiens GN=HSPH1 PE=2 SV=1                            | tr B4DYH1 B4DYH1_HUMAN         | 97 kDa  | 0  | 2  | 2  |
| General vesicular transport factor p115 OS=Homo sapiens GN=USO1 PE=4 SV=1                                       | tr F5H4X1 F5H4X1_HUMAN         | 106 kDa | 0  | 3  | 6  |
| Serine/threonine-protein phosphatase 6 regulatory subunit 3 OS=Homo sapiens GN=PPP6R3 PE=4 SV=1                 | tr E9PKF6 E9PKF6_HUMAN (+1)    | 94 kDa  | 0  | 12 | 3  |
| Heterogeneous nuclear ribonucleoprotein U-like protein 1 OS=Homo sapiens GN=HNRNPUL1 PE=2 SV=1                  | tr B7Z4B8 B7Z4B8_HUMAN         | 86 kDa  | 0  | 3  | 4  |
| Kaliocin-1 (Fragment) OS=Homo sapiens GN=LTF PE=4 SV=1                                                          | tr E7EQB2 E7EQB2_HUMAN (+1)    | 77 kDa  | 3  | 3  | 2  |
| Myosin light polypeptide 6 OS=Homo sapiens GN=MYL6 PE=2 SV=1                                                    | tr B7Z6Z4 B7Z6Z4_HUMAN         | 27 kDa  | 4  | 3  | 2  |
| Serine/threonine-protein kinase MRCK beta (Fragment) OS=Homo sapiens GN=CDC42BPB PE=4 SV=1                      | tr HOYLY0 HOYLY0_HUMAN         | 75 kDa  | 2  | 0  | 0  |
| Protein transport protein Sec31A OS=Homo sapiens GN=SEC31A PE=4 SV=1                                            | tr D6REX3 D6REX3_HUMAN         | 136 kDa | 2  | 0  | 2  |
| Rho guanine nucleotide exchange factor 4 OS=Homo sapiens GN=ARHGEF4 PE=4 SV=1                                   | tr E7EV07 E7EV07_HUMAN         | 108 kDa | 0  | 0  | 2  |
| Puromycin-sensitive aminopeptidase OS=Homo sapiens GN=NPEPPS PE=4 SV=1                                          | tr E9PLK3 E9PLK3_HUMAN         | 103 kDa | 6  | 2  | 2  |
| Nucleoside diphosphate kinase A OS=Homo sapiens GN=NME1 PE=3 SV=1                                               | tr E7ERL0 E7ERL0_HUMAN         | 15 kDa  | 5  | 4  | 3  |
| Rho GTPase activating protein 25, isoform CRA_a OS=Homo sapiens GN=ARHGAP25 PE=4 SV=1                           | tr G5E9G2 G5E9G2_HUMAN         | 73 kDa  | 2  | 0  | 0  |
| Keratin, type II cytoskeletal 74 OS=Homo sapiens GN=KRT74 PE=3 SV=1                                             | tr F8W1S1 F8W1S1_HUMAN         | 59 kDa  | 2  | 0  | 2  |
| Ras GTPase-activating-like protein IQGAP1 (Fragment) OS=Homo sapiens GN=IQGAP1 PE=4 SV=1                        | tr HOYKA5 HOYKA5_HUMAN         | 5 kDa   | 0  | 2  | 2  |
| Rho-associated protein kinase 2 OS=Homo sapiens GN=ROCK2 PE=4 SV=1                                              | tr E9PF63 E9PF63_HUMAN         | 133 kDa | 4  | 3  | 7  |
| Adenosylhomocysteinase OS=Homo sapiens GN=AHCY PE=3 SV=1                                                        | tr F5H737 F5H737_HUMAN         | 45 kDa  | 8  | 2  | 3  |
| Tripartite motif-containing protein 67 OS=Homo sapiens GN=TRIM67 PE=4 SV=1                                      | tr F8W8C1 F8W8C1_HUMAN         | 84 kDa  | 0  | 2  | 2  |
| Guanine nucleotide-binding protein G(i) subunit alpha-2 OS=Homo sapiens GN=GNAI2 PE=4 SV=1                      | tr F8WE78 F8WE78_HUMAN         | 15 kDa  | 0  | 0  | 2  |
| Probable ATP-dependent RNA helicase DHX36 OS=Homo sapiens GN=DHX36 PE=4 SV=1                                    | tr F5GZS0 F5GZS0_HUMAN         | 113 kDa | 0  | 4  | 0  |
| Stress-induced-phosphoprotein 1 OS=Homo sapiens GN=STIP1 PE=4 SV=1                                              | tr G3XAD8 G3XAD8_HUMAN         | 68 kDa  | 5  | 0  | 0  |
| Glia maturation factor beta (Fragment) OS=Homo sapiens GN=GMFB PE=4 SV=1                                        | tr G3V4P8 G3V4P8_HUMAN         | 18 kDa  | 2  | 4  | 2  |
| Septin-7 OS=Homo sapiens GN=SEPT7 PE=3 SV=1                                                                     | tr E7EPK1 E7EPK1_HUMAN (+1)    | 51 kDa  | 10 | 2  | 2  |
| Archain 1, isoform CRA_a OS=Homo sapiens GN=ARCN1 PE=4 SV=1                                                     | tr BOYIW6 BOYIW6_HUMAN         | 62 kDa  | 8  | 0  | 0  |
| Ribonucleoprotein PTB-binding 1 OS=Homo sapiens GN=RAVER1 PE=4 SV=1                                             | tr E9PAU2 E9PAU2_HUMAN         | 80 kDa  | 0  | 5  | 10 |
| Mastermind-like protein 3 OS=Homo sapiens GN=MAML3 PE=4 SV=1                                                    | REVtr E7EVW8 E7EVW8_HUMAN      | 122 kDa | 0  | 0  | 0  |
| Putative high mobility group protein B1-like 1 OS=Homo sapiens GN=HMGB1P1 PE=5 SV=1                             | sp B2RPK0 HG81A_HUMAN          | 24 kDa  | 0  | 3  | 2  |
| Dynactin subunit 1 OS=Homo sapiens GN=DCTN1 PE=4 SV=2                                                           | tr A8MY36 A8MY36_HUMAN (+3)    | 141 kDa | 4  | 3  | 5  |
| 14-3-3 protein epsilon OS=Homo sapiens GN=YWHAE PE=4 SV=1                                                       | tr B4DJF2 B4DJF2_HUMAN         | 11 kDa  | 0  | 3  | 0  |
| Ras-related protein Rap-1b-like protein OS=Homo sapiens PE=2 SV=1                                               | sp A6NIZ1 RP1BL_HUMAN          | 21 kDa  | 0  | 0  | 4  |
| Tyrosine-protein phosphatase non-receptor type 6 (Fragment) OS=Homo sapiens GN=PTPN6 PE=4 SV=1                  | tr F5H0N8 F5H0N8_HUMAN         | 18 kDa  | 7  | 0  | 0  |
| Eukaryotic translation initiation factor 4 gamma 2 (Fragment) OS=Homo sapiens GN=EIF4G2 PE=4 SV=1               | tr D3DQV9 D3DQV9_HUMAN         | 102 kDa | 2  | 0  | 0  |
| T-complex protein 1 subunit alpha OS=Homo sapiens GN=TCP1 PE=3 SV=1                                             | tr E7EQR6 E7EQR6_HUMAN         | 44 kDa  | 8  | 0  | 0  |
| ADAMTS-like protein 4 OS=Homo sapiens GN=ADAMTSL4 PE=4 SV=1                                                     | tr F8WAD0 F8WAD0_HUMAN         | 119 kDa | 0  | 0  | 0  |
| SH3 and multiple ankyrin repeat domains protein 3 OS=Homo sapiens GN=SHANK3 PE=4 SV=1                           | tr F2Z3L0 F2Z3L0_HUMAN         | 186 kDa | 0  | 0  | 2  |
| V-type proton ATPase catalytic subunit A OS=Homo sapiens GN=ATP6V1A PE=2 SV=1                                   | tr B7Z1R5 B7Z1R5_HUMAN         | 65 kDa  | 6  | 0  | 0  |
| Zyxin (Fragment) OS=Homo sapiens GN=ZYX PE=4 SV=1                                                               | tr HOY2Y8 HOY2Y8_HUMAN         | 58 kDa  | 2  | 3  | 2  |
| Malate dehydrogenase OS=Homo sapiens GN=MDH1 PE=3 SV=1                                                          | tr F5H098 F5H098_HUMAN         | 39 kDa  | 2  | 2  | 2  |
| SH3 domain-binding protein 1 OS=Homo sapiens GN=SH3BP1 PE=4 SV=1                                                | tr F5GZA8 F5GZA8_HUMAN         | 55 kDa  | 5  | 2  | 2  |
| Serine/threonine-protein kinase WNK2 OS=Homo sapiens GN=WNK2 PE=4 SV=1                                          | REVtr F8W9F9 F8W9F9_HUMAN (+1) | 234 kDa | 2  | 0  | 0  |
| Ugl-Y3 OS=Homo sapiens GN=FN1 PE=4 SV=1                                                                         | tr F8W7G7 F8W7G7_HUMAN (+1)    | 243 kDa | 0  | 3  | 0  |
| Far upstream element-binding protein 1 OS=Homo sapiens GN=FUBP1 PE=2 SV=1                                       | tr B4DT31 B4DT31_HUMAN (+1)    | 70 kDa  | 5  | 0  | 0  |
| Annexin OS=Homo sapiens GN=ANXA11 PE=2 SV=1                                                                     | tr B4DVE7 B4DVE7_HUMAN         | 51 kDa  | 5  | 0  | 0  |
| T-complex protein 1 subunit delta OS=Homo sapiens GN=CCT4 PE=2 SV=1                                             | tr B7Z9L0 B7Z9L0_HUMAN         | 52 kDa  | 7  | 0  | 0  |
| Rap1 GTPase-GDP dissociation stimulator 1 OS=Homo sapiens GN=RAP1GDS1 PE=4 SV=1                                 | tr E9PH06 E9PH06_HUMAN         | 57 kDa  | 0  | 0  | 0  |
| Importin subunit beta-1 OS=Homo sapiens GN=KPNB1 PE=2 SV=1                                                      | tr B7ZAV6 B7ZAV6_HUMAN (+1)    | 81 kDa  | 6  | 0  | 5  |
| Cysteine and glycine-rich protein 1 OS=Homo sapiens GN=CSRP1 PE=4 SV=1                                          | tr E9PP21 E9PP21_HUMAN         | 17 kDa  | 3  | 4  | 4  |
| CAP-Gly domain-containing linker protein 1 OS=Homo sapiens GN=CLIP1 PE=4 SV=1                                   | tr F5H0N7 F5H0N7_HUMAN         | 116 kDa | 3  | 0  | 2  |
| Cohesin subunit SA-2 OS=Homo sapiens GN=STAG2 PE=4 SV=1                                                         | tr F8WAK8 F8WAK8_HUMAN         | 134 kDa | 4  | 0  | 2  |
| Serine/threonine-protein phosphatase 6 regulatory ankyrin repeat subunit B OS=Homo sapiens GN=ANKRD44 PE=4 SV=1 | tr H7BXV4 H7BXV4_HUMAN         | 100 kDa | 0  | 0  | 2  |
| Importin-5 OS=Homo sapiens GN=IPO5 PE=2 SV=1                                                                    | tr B4E0R6 B4E0R6_HUMAN         | 109 kDa | 3  | 2  | 3  |
| Protein SCAF8 OS=Homo sapiens GN=SCAF8 PE=2 SV=1                                                                | tr B7Z888 B7Z888_HUMAN         | 147 kDa | 0  | 2  | 2  |

|                                                                                                |                             |         |   |   |   |
|------------------------------------------------------------------------------------------------|-----------------------------|---------|---|---|---|
| Polyadenylate-binding protein 1 OS=Homo sapiens GN=PABPC1 PE=4 SV=1                            | tr E7EQV3 E7EQV3_HUMAN      | 66 kDa  | 4 | 0 | 0 |
| Twinfilin-2 OS=Homo sapiens GN=TWF2 PE=4 SV=1                                                  | tr D6RG15 D6RG15_HUMAN      | 29 kDa  | 5 | 3 | 3 |
| Polyubiquitin-C (Fragment) OS=Homo sapiens GN=UBC PE=1 SV=1                                    | tr F5H747 F5H747_HUMAN      | 18 kDa  | 0 | 3 | 0 |
| Protein phosphatase 1B (Fragment) OS=Homo sapiens GN=PPM1B PE=3 SV=1                           | tr C9JIR6 C9JIR6_HUMAN      | 42 kDa  | 2 | 3 | 4 |
| Poly(rC)-binding protein 2 OS=Homo sapiens GN=PCBP2 PE=2 SV=1                                  | tr B4DXP5 B4DXP5_HUMAN (+3) | 34 kDa  | 5 | 4 | 2 |
| Protein FAM49B (Fragment) OS=Homo sapiens GN=FAM49B PE=4 SV=1                                  | tr E5RI16 E5RI16_HUMAN      | 17 kDa  | 2 | 3 | 4 |
| Ras-related protein Rab-6A (Fragment) OS=Homo sapiens GN=RAB6A PE=3 SV=1                       | tr HOYGL6 HOYGL6_HUMAN      | 23 kDa  | 0 | 3 | 3 |
| FYVE and coiled-coil domain-containing protein 1 OS=Homo sapiens GN=FYCO1 PE=2 SV=1            | tr B7ZKT7 B7ZKT7_HUMAN      | 169 kDa | 2 | 0 | 0 |
| Protocadherin-7 OS=Homo sapiens GN=PCDH7 PE=4 SV=1                                             | REVtr F5GWJ1 F5GWJ1_HUMAN   | 137 kDa | 0 | 2 | 0 |
| GTP-binding nuclear protein Ran (Fragment) OS=Homo sapiens GN=RAN PE=4 SV=1                    | tr F5H018 F5H018_HUMAN      | 23 kDa  | 3 | 2 | 0 |
| Signal transducer and activator of transcription 3 OS=Homo sapiens GN=STAT3 PE=4 SV=1          | tr G8JLH9 G8JLH9_HUMAN      | 76 kDa  | 4 | 0 | 3 |
| Copine 1 OS=Homo sapiens GN=CPNE1 PE=4 SV=1                                                    | tr B0QZ18 B0QZ18_HUMAN (+1) | 60 kDa  | 4 | 0 | 0 |
| Fructose-bisphosphate aldolase OS=Homo sapiens GN=ALDOC PE=3 SV=1                              | tr A8MVZ9 A8MVZ9_HUMAN      | 36 kDa  | 6 | 0 | 3 |
| Septin 6 OS=Homo sapiens GN=SEPT6 PE=3 SV=1                                                    | tr B1AMS2 B1AMS2_HUMAN (+1) | 49 kDa  | 7 | 2 | 2 |
| Protein disulfide-isomerase OS=Homo sapiens GN=P4HB PE=3 SV=1                                  | tr F5H8J2 F5H8J2_HUMAN (+1) | 51 kDa  | 5 | 0 | 0 |
| Vigilin (Fragment) OS=Homo sapiens GN=HDLBP PE=4 SV=1                                          | tr HOY394 HOY394_HUMAN      | 109 kDa | 2 | 0 | 0 |
| V-type proton ATPase subunit D OS=Homo sapiens GN=ATP6V1D PE=4 SV=1                            | tr G3V2S6 G3V2S6_HUMAN      | 22 kDa  | 0 | 3 | 3 |
| Differentially-expressed in FDCP 6 homolog OS=Homo sapiens GN=DEF6 PE=4 SV=1                   | tr F5H853 F5H853_HUMAN      | 44 kDa  | 3 | 2 | 2 |
| Ras-related protein Rab-2A OS=Homo sapiens GN=RAB2A PE=3 SV=1                                  | tr E9PKL7 E9PKL7_HUMAN      | 21 kDa  | 0 | 4 | 4 |
| Ras-related protein Rab-1B OS=Homo sapiens GN=RAB1B PE=3 SV=1                                  | tr E9PLD0 E9PLD0_HUMAN      | 18 kDa  | 0 | 3 | 4 |
| Rho GTPase-activating protein 4 OS=Homo sapiens GN=ARHGAP4 PE=4 SV=1                           | tr E7EQN5 E7EQN5_HUMAN (+1) | 103 kDa | 0 | 0 | 3 |
| Eukaryotic translation initiation factor 3 subunit J OS=Homo sapiens GN=EIF3J PE=2 SV=1        | tr B4DUI3 B4DUI3_HUMAN      | 23 kDa  | 2 | 0 | 0 |
| C-myc promoter-binding protein (Fragment) OS=Homo sapiens GN=DENND4A PE=4 SV=1                 | tr H3BTW5 H3BTW5_HUMAN      | 113 kDa | 0 | 2 | 4 |
| Putative tropomyosin alpha-3 chain-like protein OS=Homo sapiens PE=5 SV=2                      | sp A6NL28 TPM3L_HUMAN       | 26 kDa  | 0 | 0 | 0 |
| Histone H2B OS=Homo sapiens GN=HIST2H2BF PE=2 SV=1                                             | tr B4DRS2 B4DRS2_HUMAN      | 18 kDa  | 0 | 2 | 4 |
| Annexin OS=Homo sapiens GN=ANXA5 PE=3 SV=1                                                     | tr D6RBL5 D6RBL5_HUMAN      | 29 kDa  | 2 | 2 | 6 |
| Proteasome activator complex subunit 1 OS=Homo sapiens GN=PSME1 PE=4 SV=2                      | tr A6NJG9 A6NJG9_HUMAN (+1) | 29 kDa  | 5 | 3 | 3 |
| Structural maintenance of chromosomes protein 1A (Fragment) OS=Homo sapiens GN=SMC1A PE=4 SV=1 | tr HOY7K8 HOY7K8_HUMAN      | 34 kDa  | 4 | 0 | 2 |
| Chromosome 10 open reading frame 68 OS=Homo sapiens GN=C10orf68 PE=4 SV=1                      | tr A2A3D6 A2A3D6_HUMAN      | 67 kDa  | 0 | 0 | 0 |
| Eukaryotic translation initiation factor 3 subunit C OS=Homo sapiens GN=EIF3C PE=4 SV=1        | tr B5ME19 B5ME19_HUMAN (+1) | 105 kDa | 2 | 0 | 0 |
| Protein FAM65A (Fragment) OS=Homo sapiens GN=FAM65A PE=4 SV=1                                  | tr HOY442 HOY442_HUMAN      | 131 kDa | 0 | 0 | 3 |
| Phosphodiesterase 5A, cGMP-specific, isoform CRA_a OS=Homo sapiens GN=PDE5A PE=4 SV=1          | tr G5E9C5 G5E9C5_HUMAN      | 94 kDa  | 4 | 0 | 0 |
| Eukaryotic translation initiation factor 3 subunit H OS=Homo sapiens GN=EIF3S3 PE=2 SV=1       | tr B3KS98 B3KS98_HUMAN      | 42 kDa  | 2 | 0 | 0 |
| Splicing factor, proline- and glutamine-rich (Fragment) OS=Homo sapiens GN=SFPQ PE=4 SV=1      | tr HOY9K7 HOY9K7_HUMAN      | 26 kDa  | 0 | 2 | 2 |
| Lymphocyte-specific protein 1 OS=Homo sapiens GN=LSP1 PE=4 SV=1                                | tr E9PBV6 E9PBV6_HUMAN (+1) | 30 kDa  | 2 | 0 | 0 |
| PDZ and LIM domain protein 5 OS=Homo sapiens GN=PDLIM5 PE=4 SV=1                               | tr D6RB78 D6RB78_HUMAN      | 68 kDa  | 2 | 0 | 0 |
| Hexokinase-1 OS=Homo sapiens GN=HK1 PE=4 SV=1                                                  | tr E7ENR4 E7ENR4_HUMAN      | 106 kDa | 0 | 0 | 2 |
| Heterogeneous nuclear ribonucleoprotein A3 OS=Homo sapiens GN=HNRNPA3 PE=4 SV=1                | tr E7EWI9 E7EWI9_HUMAN      | 34 kDa  | 2 | 2 | 2 |
| Thioredoxin OS=Homo sapiens GN=TXN PE=4 SV=1                                                   | tr B1ALW1 B1ALW1_HUMAN      | 9 kDa   | 0 | 0 | 0 |
| Ras-related protein Rab-35 (Fragment) OS=Homo sapiens GN=RAB35 PE=3 SV=1                       | tr F5H157 F5H157_HUMAN      | 21 kDa  | 0 | 3 | 3 |
| AP-1 complex subunit gamma-1 OS=Homo sapiens GN=AP1G1 PE=2 SV=1                                | tr B3KXW5 B3KXW5_HUMAN      | 94 kDa  | 3 | 3 | 4 |
| Radixin OS=Homo sapiens GN=RDX PE=2 SV=1                                                       | tr A7YI18 A7YI18_HUMAN      | 71 kDa  | 5 | 0 | 0 |
| RuvB-like 2 OS=Homo sapiens GN=RUVBL2 PE=2 SV=1                                                | tr B3KQ59 B3KQ59_HUMAN      | 46 kDa  | 2 | 4 | 2 |
| Threonine--tRNA ligase, cytoplasmic OS=Homo sapiens GN=TARS PE=3 SV=1                          | tr E7ERI3 E7ERI3_HUMAN      | 70 kDa  | 5 | 2 | 0 |
| Coactosin-like protein OS=Homo sapiens GN=COTL1 PE=4 SV=1                                      | tr H3BT58 H3BT58_HUMAN      | 8 kDa   | 2 | 3 | 0 |
| Peroxisiredoxin-5, mitochondrial OS=Homo sapiens GN=PRDX5 PE=4 SV=1                            | tr A6NGO6 A6NGO6_HUMAN      | 17 kDa  | 2 | 4 | 3 |
| Ribosomal protein S6 kinase OS=Homo sapiens GN=RPS6KA1 PE=3 SV=1                               | tr E9PGT3 E9PGT3_HUMAN (+1) | 81 kDa  | 0 | 4 | 0 |
| 60S ribosomal protein L23 OS=Homo sapiens GN=RPL23 PE=3 SV=1                                   | tr B9ZVP7 B9ZVP7_HUMAN      | 12 kDa  | 0 | 4 | 3 |
| Mitogen-activated protein kinase 14 OS=Homo sapiens GN=MAPK14 PE=2 SV=1                        | tr B4E0K5 B4E0K5_HUMAN      | 32 kDa  | 6 | 2 | 0 |
| Heterogeneous nuclear ribonucleoprotein H OS=Homo sapiens GN=HNRNPH1 PE=4 SV=1                 | tr E9PCY7 E9PCY7_HUMAN      | 47 kDa  | 0 | 4 | 2 |
| Rho guanine nucleotide exchange factor 6 OS=Homo sapiens GN=ARHGEF6 PE=2 SV=1                  | tr B7Z3C7 B7Z3C7_HUMAN      | 73 kDa  | 0 | 0 | 0 |
| Structural maintenance of chromosomes protein OS=Homo sapiens GN=SMC4 PE=3 SV=1                | tr E9PD53 E9PD53_HUMAN      | 144 kDa | 0 | 0 | 2 |
| Meteorin OS=Homo sapiens GN=METRIN PE=4 SV=1                                                   | tr H3BUM1 H3BUM1_HUMAN      | 17 kDa  | 0 | 3 | 0 |
| Kinase suppressor of Ras 1 OS=Homo sapiens GN=KSR1 PE=4 SV=1                                   | tr F8WEA9 F8WEA9_HUMAN      | 102 kDa | 0 | 4 | 5 |
| 26S protease regulatory subunit 6A OS=Homo sapiens GN=PSMC3 PE=3 SV=1                          | tr E9PM69 E9PM69_HUMAN      | 44 kDa  | 5 | 0 | 2 |

|                                                                                                         |                             |         |   |   |   |
|---------------------------------------------------------------------------------------------------------|-----------------------------|---------|---|---|---|
| Leucine-rich repeat flightless-interacting protein 1 OS=Homo sapiens GN=LRRFIP1 PE=4 SV=1               | tr E9PGZ2 E9PGZ2_HUMAN      | 73 kDa  | 2 | 2 | 3 |
| Isocitrate dehydrogenase [NADP] OS=Homo sapiens GN=IDH2 PE=2 SV=1                                       | tr B4DFL2 B4DFL2_HUMAN      | 45 kDa  | 0 | 3 | 2 |
| Prostaglandin E synthase 3 OS=Homo sapiens GN=PTGES3 PE=2 SV=1                                          | tr B4DP21 B4DP21_HUMAN      | 15 kDa  | 0 | 2 | 2 |
| Ubiquitin carboxyl-terminal hydrolase OS=Homo sapiens GN=USP15 PE=3 SV=2                                | tr E9PCQ3 E9PCQ3_HUMAN      | 110 kDa | 2 | 0 | 0 |
| Protein phosphatase 1 regulatory subunit 12C OS=Homo sapiens GN=PPP1R12C PE=4 SV=2                      | tr B5MEC7 B5MEC7_HUMAN      | 78 kDa  | 4 | 2 | 0 |
| Kinesin heavy chain isoform 5C OS=Homo sapiens GN=KIF5C PE=3 SV=2                                       | tr E9PET8 E9PET8_HUMAN      | 99 kDa  | 3 | 4 | 2 |
| 26S protease regulatory subunit 8 OS=Homo sapiens GN=PSMC5 PE=2 SV=1                                    | tr A8K3Z3 A8K3Z3_HUMAN      | 45 kDa  | 3 | 2 | 2 |
| Serine/threonine-protein phosphatase 6 catalytic subunit OS=Homo sapiens GN=PPP6C PE=2 SV=1             | tr B7Z3E2 B7Z3E2_HUMAN      | 18 kDa  | 0 | 2 | 6 |
| 40S ribosomal protein S4, Y isoform 1 (Fragment) OS=Homo sapiens GN=RPS4Y1 PE=4 SV=1                    | tr C9JEH7 C9JEH7_HUMAN      | 29 kDa  | 0 | 5 | 4 |
| 14-3-3 protein zeta/delta OS=Homo sapiens GN=YWHAZ PE=2 SV=1                                            | tr B0AZS6 B0AZS6_HUMAN      | 19 kDa  | 0 | 5 | 5 |
| Calpain-9 OS=Homo sapiens GN=CAPN9 PE=4 SV=1                                                            | REVtr E7ESS6 E7ESS6_HUMAN   | 72 kDa  | 0 | 0 | 0 |
| Protein Wnt OS=Homo sapiens GN=WNT11 PE=3 SV=1                                                          | REVtr E9PJL6 E9PJL6_HUMAN   | 27 kDa  | 0 | 2 | 0 |
| B-cell CLL/lymphoma 9-like protein (Fragment) OS=Homo sapiens GN=BCL9L PE=4 SV=2                        | tr E9PIW0 E9PIW0_HUMAN      | 79 kDa  | 2 | 0 | 0 |
| Keratin, type I cytoskeletal 18 OS=Homo sapiens GN=KRT18 PE=3 SV=1                                      | REVtr F8VZY9 F8VZY9_HUMAN   | 44 kDa  | 0 | 2 | 0 |
| Annexin OS=Homo sapiens GN=ANXA7 PE=2 SV=1                                                              | tr B4DT77 B4DT77_HUMAN      | 38 kDa  | 4 | 0 | 0 |
| Vacuolar protein sorting-associated protein 29 OS=Homo sapiens GN=VPS29 PE=4 SV=1                       | tr F8VXU5 F8VXU5_HUMAN      | 24 kDa  | 2 | 0 | 0 |
| ING2 splice variant 1 OS=Homo sapiens GN=ING2b PE=2 SV=1                                                | tr B6ZDS1 B6ZDS1_HUMAN (+1) | 28 kDa  | 0 | 0 | 2 |
| RNA-binding protein 39 OS=Homo sapiens GN=RBM39 PE=4 SV=1                                               | tr E1P5S2 E1P5S2_HUMAN      | 41 kDa  | 0 | 3 | 4 |
| Phosphatidylinositol 3,4,5-trisphosphate 5-phosphatase 1 (Fragment) OS=Homo sapiens GN=INPP5D PE=4 SV=1 | tr H0Y5Q9 H0Y5Q9_HUMAN      | 91 kDa  | 2 | 2 | 2 |
| 1,4-alpha-glucan-branching enzyme OS=Homo sapiens GN=GBE1 PE=4 SV=1                                     | tr E9PGM4 E9PGM4_HUMAN      | 76 kDa  | 3 | 0 | 0 |
| Ribose-phosphate pyrophosphokinase 2 OS=Homo sapiens GN=PRPS2 PE=4 SV=1                                 | tr D3YTJ7 D3YTJ7_HUMAN      | 22 kDa  | 0 | 0 | 2 |
| U5 small nuclear ribonucleoprotein 200 kDa helicase OS=Homo sapiens GN=SNRNP200 PE=4 SV=2               | tr C9JQA9 C9JQA9_HUMAN      | 71 kDa  | 0 | 0 | 2 |
| Proliferation-associated protein 2G4 OS=Homo sapiens GN=PA2G4 PE=4 SV=1                                 | tr F8VY8 F8VY8_HUMAN        | 42 kDa  | 6 | 0 | 0 |
| 40S ribosomal protein S14 OS=Homo sapiens GN=RPS14 PE=4 SV=1                                            | tr E5RH77 E5RH77_HUMAN      | 14 kDa  | 0 | 3 | 3 |
| Dedicator of cytokinesis protein 2 OS=Homo sapiens GN=DOCK2 PE=4 SV=1                                   | tr E5RFJ0 E5RFJ0_HUMAN      | 119 kDa | 0 | 5 | 4 |
| Arachidonate 15-lipoxygenase OS=Homo sapiens GN=ALOX15 PE=2 SV=1                                        | tr B7ZA11 B7ZA11_HUMAN (+1) | 70 kDa  | 3 | 0 | 0 |
| ADP-ribosylation factor-like 8B, isoform CRA_a OS=Homo sapiens GN=ARL8B PE=2 SV=1                       | tr B4DI85 B4DI85_HUMAN      | 19 kDa  | 0 | 3 | 5 |
| Myelin oligodendrocyte glycoprotein OS=Homo sapiens GN=MOG PE=4 SV=1                                    | REVtr B0UZR7 B0UZR7_HUMAN   | 34 kDa  | 0 | 0 | 0 |
| Heat shock 70 kDa protein 4L OS=Homo sapiens GN=HSPA4L PE=3 SV=2                                        | tr E7ES43 E7ES43_HUMAN      | 98 kDa  | 0 | 2 | 0 |
| COP9 signalosome complex subunit 4 OS=Homo sapiens GN=COP54 PE=4 SV=1                                   | tr D6RAX7 D6RAX7_HUMAN      | 48 kDa  | 3 | 0 | 2 |
| Regulator of G-protein-signaling 3 OS=Homo sapiens GN=RGS3 PE=2 SV=1                                    | tr B3KUB2 B3KUB2_HUMAN      | 66 kDa  | 0 | 2 | 0 |
| Fermitin family homolog 3 (Fragment) OS=Homo sapiens GN=FERMT3 PE=4 SV=1                                | tr H0YFT5 H0YFT5_HUMAN      | 20 kDa  | 2 | 0 | 0 |
| 4-trimethylaminobutylaldehyde dehydrogenase OS=Homo sapiens GN=ALDH9A1 PE=2 SV=1                        | tr B4DXY7 B4DXY7_HUMAN      | 46 kDa  | 4 | 0 | 0 |
| AP-2 complex subunit alpha-2 OS=Homo sapiens GN=AP2A2 PE=4 SV=1                                         | tr E9PJJ7 E9PJJ7_HUMAN      | 75 kDa  | 0 | 0 | 2 |
| Tubulin tyrosine ligase-like family, member 12 OS=Homo sapiens GN=TTL12 PE=4 SV=1                       | tr B1AH89 B1AH89_HUMAN      | 74 kDa  | 2 | 0 | 0 |
| Putative RNA-binding protein Luc7-like 2 OS=Homo sapiens GN=LUC7L2 PE=2 SV=1                            | tr B7Z4Q3 B7Z4Q3_HUMAN      | 54 kDa  | 0 | 0 | 5 |
| Heterogeneous nuclear ribonucleoprotein A/B OS=Homo sapiens GN=HNRNPAB PE=4 SV=1                        | tr D6RBZ0 D6RBZ0_HUMAN      | 36 kDa  | 2 | 3 | 0 |
| 5'-AMP-activated protein kinase subunit gamma-1 OS=Homo sapiens GN=PRKAG1 PE=2 SV=1                     | tr B4DDT7 B4DDT7_HUMAN (+1) | 34 kDa  | 0 | 5 | 3 |
| AP-1 complex subunit beta-1 (Fragment) OS=Homo sapiens GN=AP1B1 PE=4 SV=1                               | tr C9J1E7 C9J1E7_HUMAN      | 65 kDa  | 0 | 2 | 2 |
| Regulator of G-protein-signaling 14 (Fragment) OS=Homo sapiens GN=RGS14 PE=4 SV=1                       | tr H0Y8W3 H0Y8W3_HUMAN      | 47 kDa  | 0 | 6 | 2 |
| Copine-3 (Fragment) OS=Homo sapiens GN=CPNE3 PE=4 SV=1                                                  | tr E5RG68 E5RG68_HUMAN      | 27 kDa  | 5 | 0 | 0 |
| Cytosolic purine 5'-nucleotidase OS=Homo sapiens GN=NT5C2 PE=2 SV=1                                     | tr B7Z382 B7Z382_HUMAN      | 61 kDa  | 4 | 0 | 0 |
| pre-mRNA 3' end-processing protein WDR33 (Fragment) OS=Homo sapiens GN=WDR33 PE=4 SV=1                  | tr B9A053 B9A053_HUMAN      | 14 kDa  | 0 | 0 | 0 |
| Calpain-3 OS=Homo sapiens GN=CAPN3 PE=4 SV=1                                                            | tr F8W8F5 F8W8F5_HUMAN      | 94 kDa  | 0 | 2 | 0 |
| Leucine-rich repeat serine/threonine-protein kinase 2 OS=Homo sapiens GN=LRRK2 PE=4 SV=1                | tr E9PC85 E9PC85_HUMAN      | 143 kDa | 0 | 0 | 2 |
| Sodium channel protein type 3 subunit alpha (Fragment) OS=Homo sapiens GN=SCN3A PE=4 SV=1               | tr E7EUE6 E7EUE6_HUMAN      | 154 kDa | 2 | 0 | 0 |
| Cytoplasmic dynein 1 intermediate chain 2 OS=Homo sapiens GN=DYNC112 PE=2 SV=1                          | tr B7ZA04 B7ZA04_HUMAN (+1) | 70 kDa  | 2 | 0 | 2 |
| Myosin, heavy chain 9, non-muscle (Fragment) OS=Homo sapiens GN=MYH9 PE=4 SV=1                          | tr B1AH99 B1AH99_HUMAN      | 12 kDa  | 2 | 0 | 0 |
| SH3 domain-containing kinase-binding protein 1 OS=Homo sapiens GN=SH3KBP1 PE=2 SV=1                     | tr B7Z6E8 B7Z6E8_HUMAN      | 44 kDa  | 2 | 2 | 2 |
| RAF proto-oncogene serine/threonine-protein kinase OS=Homo sapiens GN=RAF1 PE=2 SV=1                    | tr B4E0X2 B4E0X2_HUMAN (+1) | 64 kDa  | 0 | 0 | 2 |
| ADP-ribosylation factor-like protein 1 OS=Homo sapiens GN=ARL1 PE=2 SV=1                                | tr B4DWW1 B4DWW1_HUMAN (+1) | 19 kDa  | 0 | 2 | 6 |
| Eukaryotic translation initiation factor 3 subunit L OS=Homo sapiens GN=EIF3EIP PE=4 SV=1               | tr B0QY89 B0QY89_HUMAN      | 71 kDa  | 3 | 0 | 0 |
| Sorcin OS=Homo sapiens GN=SRI PE=4 SV=2                                                                 | tr A8MTH6 A8MTH6_HUMAN (+2) | 20 kDa  | 0 | 4 | 4 |
| Striatin-4 OS=Homo sapiens GN=STRN4 PE=4 SV=1                                                           | tr F8VYA6 F8VYA6_HUMAN      | 81 kDa  | 0 | 0 | 7 |
| 40S ribosomal protein S27 OS=Homo sapiens GN=RPS27L PE=3 SV=1                                           | tr H0YMV8 H0YMV8_HUMAN      | 11 kDa  | 0 | 2 | 3 |

|                                                                                                                      |                                |         |   |   |   |
|----------------------------------------------------------------------------------------------------------------------|--------------------------------|---------|---|---|---|
| Transgelin (Fragment) OS=Homo sapiens GN=TAGLN PE=4 SV=1                                                             | tr HOYCU9 HOYCU9_HUMAN         | 17 kDa  | 3 | 3 | 3 |
| T-complex protein 1 subunit epsilon OS=Homo sapiens GN=CCT5 PE=2 SV=1                                                | tr B7ZAR1 B7ZAR1_HUMAN (+1)    | 55 kDa  | 4 | 0 | 0 |
| Disrupted in schizophrenia 1 isoform 14 OS=Homo sapiens GN=DISC1 PE=2 SV=1                                           | REVtr C4P093 C4P093_HUMAN (+1) | 59 kDa  | 0 | 0 | 0 |
| Ras-related protein Rab-5C OS=Homo sapiens GN=RAB5C PE=3 SV=1                                                        | tr F8W1H5 F8W1H5_HUMAN         | 27 kDa  | 0 | 2 | 2 |
| Drebrin-like protein OS=Homo sapiens GN=DBNL PE=2 SV=1                                                               | tr B4DDDB6 B4DDDB6_HUMAN       | 46 kDa  | 2 | 0 | 0 |
| Proto-oncogene vav OS=Homo sapiens GN=VAV1 PE=4 SV=1                                                                 | tr F5H5P4 F5H5P4_HUMAN         | 87 kDa  | 0 | 0 | 2 |
| Rho guanine nucleotide exchange factor (GEF) 7 OS=Homo sapiens GN=ARHGEF7 PE=4 SV=1                                  | tr B1ALK7 B1ALK7_HUMAN         | 80 kDa  | 0 | 0 | 0 |
| Galactokinase OS=Homo sapiens GN=GALK1 PE=2 SV=1                                                                     | tr B4E1G6 B4E1G6_HUMAN         | 45 kDa  | 3 | 0 | 2 |
| Exportin-1 (Fragment) OS=Homo sapiens GN=XPO1 PE=4 SV=1                                                              | tr C9JKM9 C9JKM9_HUMAN         | 21 kDa  | 0 | 2 | 2 |
| RAS guanyl releasing protein 4 variant 6 OS=Homo sapiens GN=RASGRP4 PE=2 SV=1                                        | tr COLTP3 COLTP3_HUMAN         | 67 kDa  | 0 | 3 | 2 |
| Serine-threonine kinase receptor-associated protein OS=Homo sapiens GN=STRAP PE=2 SV=1                               | tr B4DNJ6 B4DNJ6_HUMAN         | 40 kDa  | 3 | 0 | 0 |
| Rho-associated protein kinase 2 OS=Homo sapiens GN=ROCK2 PE=4 SV=1                                                   | tr D6REE7 D6REE7_HUMAN         | 51 kDa  | 0 | 2 | 2 |
| Cytoskeleton-associated protein 5 (Fragment) OS=Homo sapiens GN=CKAP5 PE=4 SV=1                                      | tr HOYDX5 HOYDX5_HUMAN         | 23 kDa  | 0 | 3 | 3 |
| 60S ribosomal protein L24 OS=Homo sapiens GN=RPL24 PE=4 SV=1                                                         | tr C9JNW5 C9JNW5_HUMAN (+1)    | 18 kDa  | 0 | 2 | 2 |
| Stress-70 protein, mitochondrial (Fragment) OS=Homo sapiens GN=HSPA9 PE=3 SV=1                                       | tr D6RIJ2 D6RIJ2_HUMAN         | 10 kDa  | 0 | 3 | 2 |
| Protein SEC13 homolog OS=Homo sapiens GN=SEC13 PE=4 SV=1                                                             | tr A8MV37 A8MV37_HUMAN (+1)    | 34 kDa  | 0 | 3 | 4 |
| Cytoplasmic dynein 1 heavy chain 1 (Fragment) OS=Homo sapiens GN=DYNC1H1 PE=4 SV=1                                   | tr HOYJ21 HOYJ21_HUMAN         | 21 kDa  | 0 | 3 | 3 |
| Septin-1 (Fragment) OS=Homo sapiens GN=SEPT1 PE=4 SV=1                                                               | tr H3B552 H3B552_HUMAN         | 29 kDa  | 0 | 2 | 3 |
| WD repeat- and FYVE domain-containing protein 4 OS=Homo sapiens GN=WDFY4 PE=4 SV=1                                   | tr F8WCU4 F8WCU4_HUMAN         | 115 kDa | 0 | 2 | 3 |
| Cytokine receptor-like factor 3 OS=Homo sapiens GN=CRLF3 PE=2 SV=1                                                   | tr B4DJU5 B4DJU5_HUMAN         | 36 kDa  | 2 | 0 | 0 |
| Kinesin-like protein KIF2A OS=Homo sapiens GN=KIF2A PE=3 SV=1                                                        | tr E9PB70 E9PB70_HUMAN         | 78 kDa  | 2 | 2 | 0 |
| FAD-AMP lyase (cyclizing) (Fragment) OS=Homo sapiens GN=DAK PE=4 SV=1                                                | tr HOYCY6 HOYCY6_HUMAN         | 55 kDa  | 2 | 0 | 0 |
| DBIRD complex subunit KIAA1967 (Fragment) OS=Homo sapiens GN=KIAA1967 PE=4 SV=1                                      | tr HOYB24 HOYB24_HUMAN         | 69 kDa  | 0 | 2 | 2 |
| 26S protease regulatory subunit 10B (Fragment) OS=Homo sapiens GN=PSMC6 PE=4 SV=1                                    | tr HOYJCO HOYJCO_HUMAN         | 30 kDa  | 0 | 2 | 0 |
| 14-3-3 protein eta (Fragment) OS=Homo sapiens GN=YWHAH PE=4 SV=1                                                     | tr A2IDB2 A2IDB2_HUMAN         | 19 kDa  | 2 | 3 | 3 |
| Fibulin 1 OS=Homo sapiens GN=FBLN1 PE=4 SV=1                                                                         | tr B1AHL2 B1AHL2_HUMAN         | 78 kDa  | 0 | 2 | 0 |
| Protein CNPPD1 (Fragment) OS=Homo sapiens GN=CNPPD1 PE=4 SV=1                                                        | tr C9JF31 C9JF31_HUMAN         | 34 kDa  | 0 | 3 | 0 |
| Isoform 3 of EF-hand calcium-binding domain-containing protein 5 OS=Homo sapiens GN=EFCAB5                           | sp A4FU69-3 EFCB5_HUMAN (+1)   | 159 kDa | 0 | 0 | 2 |
| PAP-associated domain-containing protein 5 OS=Homo sapiens GN=PAPD5 PE=2 SV=1                                        | tr B4DV38 B4DV38_HUMAN         | 76 kDa  | 0 | 0 | 0 |
| LIM and calponin homology domains-containing protein 1 OS=Homo sapiens GN=LIMCH1 PE=4 SV=1                           | tr G5EA03 G5EA03_HUMAN         | 164 kDa | 2 | 0 | 0 |
| Eukaryotic translation initiation factor 3 subunit D OS=Homo sapiens GN=EIF3D PE=2 SV=1                              | tr B4DVY1 B4DVY1_HUMAN         | 58 kDa  | 2 | 0 | 0 |
| Small nuclear ribonucleoprotein Sm D3 OS=Homo sapiens GN=SNRPD3 PE=2 SV=1                                            | tr B4DJP7 B4DJP7_HUMAN         | 13 kDa  | 0 | 2 | 2 |
| Voltage-gated potassium channel subunit beta-2 OS=Homo sapiens GN=KCNAB2 PE=4 SV=2                                   | tr E7ESI4 E7ESI4_HUMAN         | 18 kDa  | 2 | 0 | 0 |
| Transcription elongation factor A protein 1 OS=Homo sapiens GN=TCEA1 PE=4 SV=1                                       | tr B7Z4S1 B7Z4S1_HUMAN         | 13 kDa  | 2 | 0 | 3 |
| Eukaryotic translation initiation factor 3 subunit F OS=Homo sapiens GN=EIF3F PE=2 SV=1                              | tr B3KSH1 B3KSH1_HUMAN         | 39 kDa  | 2 | 0 | 0 |
| Spliceosome RNA helicase DDX39B OS=Homo sapiens GN=DDX39B PE=4 SV=1                                                  | tr F8VQ10 F8VQ10_HUMAN         | 51 kDa  | 3 | 0 | 0 |
| Protein SET OS=Homo sapiens GN=SET PE=3 SV=1                                                                         | tr B2REB8 B2REB8_HUMAN         | 31 kDa  | 2 | 0 | 2 |
| Mitotic checkpoint protein BUB3 OS=Homo sapiens GN=BUB3 PE=2 SV=1                                                    | tr B4DDM6 B4DDM6_HUMAN         | 28 kDa  | 4 | 0 | 0 |
| DENN domain-containing protein 4B (Fragment) OS=Homo sapiens GN=DENND4B PE=4 SV=1                                    | tr E9PAK5 E9PAK5_HUMAN         | 133 kDa | 0 | 2 | 0 |
| DnaJ homolog subfamily A member 2 (Fragment) OS=Homo sapiens GN=DNAJA2 PE=4 SV=1                                     | tr H3BMW5 H3BMW5_HUMAN         | 15 kDa  | 0 | 0 | 2 |
| Peptidyl-prolyl cis-trans isomerase (Fragment) OS=Homo sapiens GN=PPIH PE=3 SV=1                                     | tr C9JQD4 C9JQD4_HUMAN         | 16 kDa  | 0 | 3 | 0 |
| Nuclear receptor-binding protein OS=Homo sapiens GN=NRBP1 PE=4 SV=1                                                  | tr F8W6G1 F8W6G1_HUMAN         | 61 kDa  | 2 | 0 | 0 |
| Protein phosphatase 2A activator, regulatory subunit 4 OS=Homo sapiens GN=PPP2R4 PE=4 SV=1                           | tr A6PVN5 A6PVN5_HUMAN         | 37 kDa  | 2 | 0 | 0 |
| Dihydropyrimidinase-related protein 1 OS=Homo sapiens GN=CRMP1 PE=4 SV=1                                             | tr E9PD68 E9PD68_HUMAN         | 62 kDa  | 3 | 0 | 0 |
| ATP-binding cassette sub-family E member 1 OS=Homo sapiens GN=ABCE1 PE=4 SV=1                                        | tr D6R9I9 D6R9I9_HUMAN         | 47 kDa  | 4 | 0 | 0 |
| RuvB-like 1 OS=Homo sapiens GN=RUVBL1 PE=4 SV=1                                                                      | tr E7ETRO E7ETRO_HUMAN         | 35 kDa  | 2 | 0 | 0 |
| N-alpha-acetyltransferase 50 OS=Homo sapiens GN=NAA50 PE=4 SV=1                                                      | tr C9J5D1 C9J5D1_HUMAN         | 15 kDa  | 0 | 3 | 2 |
| Calcium/calmodulin-dependent protein kinase (CaM kinase) II delta, isoform CRA_e OS=Homo sapiens GN=CAMK2D PE=4 SV=1 | tr D6R938 D6R938_HUMAN (+1)    | 56 kDa  | 4 | 0 | 0 |
| Proteasome subunit alpha type-1 OS=Homo sapiens GN=PSMA1 PE=4 SV=1                                                   | tr F5GX11 F5GX11_HUMAN         | 27 kDa  | 2 | 2 | 2 |
| Putative deoxyribose-phosphate aldolase OS=Homo sapiens GN=DERA PE=4 SV=1                                            | tr E9PPM8 E9PPM8_HUMAN         | 31 kDa  | 0 | 2 | 2 |
| Protein-arginine deiminase type-2 OS=Homo sapiens GN=PADI2 PE=2 SV=1                                                 | tr B4DIU3 B4DIU3_HUMAN         | 62 kDa  | 2 | 0 | 0 |
| Phospholipase DDHD2 OS=Homo sapiens GN=DDHD2 PE=2 SV=1                                                               | tr B3KX85 B3KX85_HUMAN         | 38 kDa  | 0 | 0 | 2 |
| Coatmer subunit gamma-1 (Fragment) OS=Homo sapiens GN=COPG1 PE=4 SV=1                                                | tr HOY8X7 HOY8X7_HUMAN         | 21 kDa  | 0 | 3 | 4 |
| Eukaryotic translation initiation factor 3 subunit E OS=Homo sapiens GN=EIF3E PE=3 SV=1                              | tr E5RGA2 E5RGA2_HUMAN         | 41 kDa  | 4 | 0 | 0 |
| DnaI homolog subfamily A member 1 OS=Homo sapiens GN=DNAJA1 PE=2 SV=1                                                | tr B7Z5C0 B7Z5C0_HUMAN         | 28 kDa  | 0 | 0 | 3 |

|                                                                                                                              |                               |         |   |   |   |
|------------------------------------------------------------------------------------------------------------------------------|-------------------------------|---------|---|---|---|
| DnaJ homolog subfamily B member 1 OS=Homo sapiens GN=DNAJB1 PE=2 SV=1                                                        | tr B4DX52 B4DX52_HUMAN        | 27 kDa  | 2 | 2 | 2 |
| Transportin-1 OS=Homo sapiens GN=TNPO1 PE=2 SV=1                                                                             | tr B4DSC0 B4DSC0_HUMAN (+1)   | 15 kDa  | 0 | 0 | 2 |
| Zinc transporter 3 (Fragment) OS=Homo sapiens GN=SLC30A3 PE=4 SV=1                                                           | REVtr H7BZ83 H7BZ83_HUMAN     | 33 kDa  | 0 | 2 | 0 |
| Cytoplasmic dynein 1 light intermediate chain 1 OS=Homo sapiens GN=DYNC1L1 PE=4 SV=1                                         | tr E9PHI6 E9PHI6_HUMAN        | 43 kDa  | 2 | 0 | 0 |
| Fibrocystin-L (Fragment) OS=Homo sapiens GN=PKHD1L1 PE=4 SV=1                                                                | REVtr HOYF65 HOYF65_HUMAN     | 129 kDa | 0 | 0 | 0 |
| 6-phosphofructokinase, muscle type (Fragment) OS=Homo sapiens GN=PFKM PE=4 SV=1                                              | tr F8VNX2 F8VNX2_HUMAN (+3)   | 17 kDa  | 0 | 3 | 0 |
| Protein mago nashi homolog 2 OS=Homo sapiens GN=MAGOHB PE=4 SV=1                                                             | tr A6NEC0 A6NEC0_HUMAN (+1)   | 13 kDa  | 2 | 0 | 2 |
| Tyrosine-protein kinase Fes/Fps OS=Homo sapiens GN=FES PE=3 SV=1                                                             | tr E7ENM8 E7ENM8_HUMAN        | 77 kDa  | 2 | 0 | 3 |
| Protein disulfide-isomerase A6 OS=Homo sapiens GN=PDIA6 PE=3 SV=1                                                            | tr B5MCQ5 B5MCQ5_HUMAN        | 53 kDa  | 5 | 0 | 0 |
| Nuclease-sensitive element-binding protein 1 (Fragment) OS=Homo sapiens GN=YBX1 PE=4 SV=1                                    | tr HOY449 HOY449_HUMAN        | 42 kDa  | 0 | 2 | 3 |
| Endoplasmic (Fragment) OS=Homo sapiens GN=HSP90B1 PE=4 SV=1                                                                  | tr HOYIV0 HOYIV0_HUMAN        | 17 kDa  | 2 | 0 | 0 |
| Glyoxalase domain-containing protein 4 OS=Homo sapiens GN=GLOD4 PE=2 SV=1                                                    | tr B7Z403 B7Z403_HUMAN        | 32 kDa  | 3 | 0 | 0 |
| Guanine nucleotide-binding protein G(I)/G(S)/G(T) subunit beta-2 OS=Homo sapiens GN=GNB2 PE=4 SV=1                           | tr E7EP32 E7EP32_HUMAN        | 32 kDa  | 0 | 2 | 0 |
| Ras-related protein Ral-B (Fragment) OS=Homo sapiens GN=RALB PE=4 SV=1                                                       | tr C9J6B1 C9J6B1_HUMAN        | 19 kDa  | 0 | 3 | 2 |
| DNA-directed RNA polymerases I and III subunit RPAC1 OS=Homo sapiens GN=POLR1C PE=4 SV=1                                     | tr E7EQB9 E7EQB9_HUMAN        | 34 kDa  | 0 | 2 | 0 |
| EMILIN-1 (Fragment) OS=Homo sapiens GN=EMILIN1 PE=4 SV=1                                                                     | tr HOY7A0 HOY7A0_HUMAN        | 36 kDa  | 0 | 0 | 2 |
| Protein phosphatase 1 regulatory subunit 12A (Fragment) OS=Homo sapiens GN=PPP1R12A PE=4 SV=1                                | tr HOYIS3 HOYIS3_HUMAN        | 27 kDa  | 3 | 0 | 0 |
| 26S proteasome non-ATPase regulatory subunit 3 OS=Homo sapiens GN=PSMD3 PE=2 SV=1                                            | tr B4DT72 B4DT72_HUMAN        | 41 kDa  | 3 | 0 | 0 |
| Bridging integrator 2 OS=Homo sapiens GN=BIN2 PE=4 SV=1                                                                      | tr F5H0W4 F5H0W4_HUMAN        | 59 kDa  | 0 | 0 | 2 |
| Aldehyde dehydrogenase family 16 member A1 OS=Homo sapiens GN=ALDH16A1 PE=4 SV=1                                             | tr F5H4B6 F5H4B6_HUMAN (+1)   | 67 kDa  | 2 | 0 | 0 |
| Serine/arginine-rich-splicing factor 2 OS=Homo sapiens GN=SFRS2 PE=2 SV=1                                                    | tr B4DN89 B4DN89_HUMAN        | 24 kDa  | 0 | 0 | 2 |
| Nck-associated protein 1-like OS=Homo sapiens GN=NCKAP1L PE=4 SV=1                                                           | tr F8W050 F8W050_HUMAN        | 52 kDa  | 0 | 0 | 2 |
| Ras-related protein Rab-18 (Fragment) OS=Homo sapiens GN=RAB18 PE=3 SV=1                                                     | tr HOY6T8 HOY6T8_HUMAN        | 33 kDa  | 0 | 2 | 0 |
| HCG2002594, isoform CRA_a OS=Homo sapiens GN=SEPT5 PE=2 SV=1                                                                 | tr B4DJ62 B4DJ62_HUMAN (+1)   | 37 kDa  | 2 | 0 | 0 |
| Abl interactor 1 OS=Homo sapiens GN=ABI1 PE=4 SV=2                                                                           | tr A6NFN2 A6NFN2_HUMAN (+1)   | 55 kDa  | 2 | 0 | 0 |
| Ubiquitin carboxyl-terminal hydrolase OS=Homo sapiens GN=USP14 PE=3 SV=2                                                     | tr A6NJA2 A6NJA2_HUMAN (+1)   | 51 kDa  | 3 | 0 | 0 |
| HCG2044799 OS=Homo sapiens GN=hCG_2044799 PE=4 SV=1                                                                          | tr H3BQZ7 H3BQZ7_HUMAN        | 85 kDa  | 0 | 2 | 3 |
| Phosphatidylinositol transfer protein beta isoform OS=Homo sapiens GN=PITPNB PE=2 SV=1                                       | tr B7Z7Q0 B7Z7Q0_HUMAN        | 32 kDa  | 2 | 2 | 0 |
| Calcineurin isoform CNEX3-10 OS=Homo sapiens GN=PPP3CA PE=2 SV=1                                                             | tr A8W6Z8 A8W6Z8_HUMAN        | 32 kDa  | 4 | 0 | 0 |
| Ras GTPase-activating-like protein IQGAP2 OS=Homo sapiens GN=IQGAP2 PE=4 SV=1                                                | tr F5H7S7 F5H7S7_HUMAN        | 124 kDa | 0 | 0 | 0 |
| Uncharacterized protein (Fragment) OS=Homo sapiens PE=4 SV=2                                                                 | tr H3BN98 H3BN98_HUMAN        | 27 kDa  | 0 | 0 | 3 |
| Protein FAM22F OS=Homo sapiens GN=FAM22F PE=2 SV=2                                                                           | REVsp A1L443 FA22F_HUMAN (+1) | 81 kDa  | 0 | 0 | 2 |
| Serine/threonine-protein phosphatase (Fragment) OS=Homo sapiens GN=PPP2CB PE=3 SV=1                                          | tr E5RFI3 E5RFI3_HUMAN (+3)   | 14 kDa  | 2 | 2 | 2 |
| PDZ and LIM domain protein 7 (Fragment) OS=Homo sapiens GN=PDLIM7 PE=4 SV=1                                                  | tr D6RH06 D6RH06_HUMAN        | 31 kDa  | 2 | 0 | 0 |
| ADP-ribosylation factor 3 OS=Homo sapiens GN=ARF3 PE=3 SV=1                                                                  | tr F5H423 F5H423_HUMAN        | 23 kDa  | 0 | 2 | 2 |
| Annexin OS=Homo sapiens GN=ANXA5 PE=3 SV=1                                                                                   | tr E7ENQ5 E7ENQ5_HUMAN        | 31 kDa  | 0 | 2 | 0 |
| Coatomer subunit zeta-1 OS=Homo sapiens GN=COPZ1 PE=4 SV=1                                                                   | tr F8VVA7 F8VVA7_HUMAN        | 22 kDa  | 0 | 0 | 2 |
| Activator of 90 kDa heat shock protein ATPase homolog 1 OS=Homo sapiens GN=AHSA1 PE=2 SV=1                                   | tr B4DUR9 B4DUR9_HUMAN (+1)   | 32 kDa  | 2 | 2 | 0 |
| Phosphoribosyl pyrophosphate synthetase 1 OS=Homo sapiens GN=PRPS1 PE=3 SV=1                                                 | tr B1ALA9 B1ALA9_HUMAN (+1)   | 24 kDa  | 0 | 0 | 0 |
| Integrator complex subunit 6 OS=Homo sapiens GN=INTS6 PE=2 SV=1                                                              | tr B4DL13 B4DL13_HUMAN        | 32 kDa  | 0 | 2 | 3 |
| SH2 domain-containing protein 3C OS=Homo sapiens GN=SH2D3C PE=4 SV=1                                                         | tr E7EUN5 E7EUN5_HUMAN        | 86 kDa  | 0 | 2 | 0 |
| GMP reductase OS=Homo sapiens GN=GMMPR2 PE=3 SV=1                                                                            | tr HOYNJ6 HOYNJ6_HUMAN        | 47 kDa  | 3 | 0 | 0 |
| Guanine nucleotide-binding protein G(I)/G(S)/G(T) subunit beta-2 (Fragment) OS=Homo sapiens GN=GNB2 PE=4 SV=1                | tr C9JXA5 C9JXA5_HUMAN        | 28 kDa  | 0 | 2 | 2 |
| Serine/threonine-protein kinase MST4 OS=Homo sapiens GN=MST4 PE=2 SV=1                                                       | tr B4E0Y9 B4E0Y9_HUMAN        | 49 kDa  | 2 | 0 | 0 |
| tRNA-splicing ligase RtcB homolog OS=Homo sapiens GN=C22orf28 PE=4 SV=2                                                      | tr E7EQS9 E7EQS9_HUMAN        | 19 kDa  | 2 | 0 | 0 |
| Vacuolar protein sorting-associated protein 26B OS=Homo sapiens GN=VPS26B PE=4 SV=1                                          | tr E9PRT4 E9PRT4_HUMAN        | 38 kDa  | 0 | 2 | 0 |
| Ras-related protein Rab-7a OS=Homo sapiens GN=RAB7A PE=3 SV=1                                                                | tr C9J8S3 C9J8S3_HUMAN        | 18 kDa  | 0 | 3 | 2 |
| Transcription elongation factor B (SIII), polypeptide 2 (18kDa, elongin B), isoform CRA_b OS=Homo sapiens GN=TCEB2 PE=4 SV=1 | tr B8ZU8 B8ZU8_HUMAN          | 13 kDa  | 0 | 0 | 2 |
| 26S proteasome non-ATPase regulatory subunit 1 (Fragment) OS=Homo sapiens GN=PSMD1 PE=4 SV=1                                 | tr C9J9M4 C9J9M4_HUMAN        | 23 kDa  | 0 | 2 | 0 |
| Protein RPSAP58 OS=Homo sapiens GN=RPSAP58 PE=3 SV=1                                                                         | tr A6NEO9 A6NEO9_HUMAN (+1)   | 33 kDa  | 2 | 0 | 0 |
| Copine-8 OS=Homo sapiens GN=CPNE8 PE=4 SV=2                                                                                  | REVtr E7ENV7 E7ENV7_HUMAN     | 62 kDa  | 0 | 0 | 2 |
| Sarcolemmal membrane-associated protein (Fragment) OS=Homo sapiens GN=SLMAP PE=4 SV=1                                        | REVtr H7BZK0 H7BZK0_HUMAN     | 50 kDa  | 2 | 0 | 0 |
| Dynactin subunit 2 OS=Homo sapiens GN=DCTN2 PE=4 SV=1                                                                        | tr F5H223 F5H223_HUMAN (+2)   | 42 kDa  | 2 | 0 | 0 |
| Cytosolic acyl coenzyme A thioester hydrolase OS=Homo sapiens GN=ACOT7 PE=4 SV=1                                             | tr F5GWE2 F5GWE2_HUMAN        | 25 kDa  | 3 | 0 | 0 |
| Structural maintenance of chromosomes protein 6 (Fragment) OS=Homo sapiens GN=SMC6 PE=4 SV=1                                 | tr C9JMN1 C9JMN1_HUMAN        | 85 kDa  | 2 | 0 | 0 |

|                                                                                                                       |                             |         |   |   |   |
|-----------------------------------------------------------------------------------------------------------------------|-----------------------------|---------|---|---|---|
| Protein arginine N-methyltransferase 1 OS=Homo sapiens GN=PRMT1 PE=4 SV=1                                             | tr E9PKG1 E9PKG1_HUMAN (+1) | 38 kDa  | 2 | 0 | 0 |
| T-lymphoma invasion and metastasis-inducing protein 1 OS=Homo sapiens GN=TIAM1 PE=4 SV=1                              | tr F5GZ53 F5GZ53_HUMAN      | 171 kDa | 0 | 0 | 2 |
| Serine/threonine-protein phosphatase 2A catalytic subunit beta isoform (Fragment) OS=Homo sapiens GN=PPP2CB PE=4 SV=1 | tr HOYC23 HOYC23_HUMAN      | 14 kDa  | 0 | 0 | 2 |
| Eukaryotic translation initiation factor 3 subunit M (Fragment) OS=Homo sapiens GN=EIF3M PE=4 SV=1                    | tr HOYCQ8 HOYCQ8_HUMAN      | 25 kDa  | 2 | 0 | 0 |
| NF-kappa-B inhibitor-interacting Ras-like protein 2 OS=Homo sapiens GN=NKIRAS2 PE=4 SV=1                              | tr C9JPP2 C9JPP2_HUMAN (+1) | 21 kDa  | 0 | 2 | 0 |
| Eukaryotic peptide chain release factor subunit 1 OS=Homo sapiens GN=ETF1 PE=2 SV=1                                   | tr B7Z7P8 B7Z7P8_HUMAN      | 47 kDa  | 3 | 0 | 0 |
| Phospholipase DDHD2 (Fragment) OS=Homo sapiens GN=DDHD2 PE=4 SV=1                                                     | tr HOYF30 HOYF30_HUMAN      | 20 kDa  | 0 | 2 | 2 |
| Protein FRG1 (Fragment) OS=Homo sapiens GN=FRG1 PE=4 SV=1                                                             | tr E9PRR7 E9PRR7_HUMAN      | 13 kDa  | 5 | 0 | 0 |
| Protein kinase C beta type (Fragment) OS=Homo sapiens GN=PRKCB PE=4 SV=1                                              | tr H3BV73 H3BV73_HUMAN      | 15 kDa  | 2 | 0 | 0 |
| Serine/threonine-protein phosphatase (Fragment) OS=Homo sapiens GN=PPP1CB PE=3 SV=1                                   | tr E7ETD8 E7ETD8_HUMAN      | 20 kDa  | 0 | 2 | 0 |
| Zinc finger protein 33A OS=Homo sapiens GN=ZNF33A PE=4 SV=1                                                           | tr F6TH33 F6TH33_HUMAN      | 95 kDa  | 0 | 2 | 0 |
| Inosine 5'-monophosphate dehydrogenase 2 (Fragment) OS=Homo sapiens GN=IMPDH2 PE=3 SV=1                               | tr HOY4R1 HOY4R1_HUMAN      | 51 kDa  | 2 | 0 | 0 |
| Ras GTPase-activating protein-binding protein 1 OS=Homo sapiens GN=G3BP1 PE=4 SV=1                                    | tr F5H4D6 F5H4D6_HUMAN      | 31 kDa  | 0 | 0 | 2 |
| Protein LSM14 homolog A OS=Homo sapiens GN=LSM14A PE=2 SV=1                                                           | tr B4DTG6 B4DTG6_HUMAN      | 46 kDa  | 2 | 0 | 0 |
| WD repeat-containing protein 86 OS=Homo sapiens GN=WDR86 PE=4 SV=1                                                    | REVtr F8WD10 F8WD10_HUMAN   | 18 kDa  | 0 | 0 | 0 |
| CAP-Gly domain-containing linker protein 1 (Fragment) OS=Homo sapiens GN=CLIP1 PE=4 SV=1                              | tr F5H6A0 F5H6A0_HUMAN      | 90 kDa  | 0 | 0 | 2 |
| Glutathione synthetase OS=Homo sapiens GN=GSS PE=2 SV=1                                                               | tr B6F210 B6F210_HUMAN      | 40 kDa  | 3 | 0 | 0 |
| Programmed cell death 6-interacting protein OS=Homo sapiens GN=PCDC6IP PE=4 SV=1                                      | tr F8WVK9 F8WVK9_HUMAN      | 11 kDa  | 2 | 2 | 0 |
| Protein tyrosine phosphatase type IVA 2 OS=Homo sapiens GN=PTP4A2 PE=4 SV=1                                           | tr E9PJCO E9PJCO_HUMAN      | 8 kDa   | 0 | 2 | 0 |
| Inositol-3-phosphate synthase 1 OS=Homo sapiens GN=ISYNA1 PE=4 SV=1                                                   | tr G5E9U0 G5E9U0_HUMAN      | 55 kDa  | 2 | 0 | 0 |
| Xaa-Pro aminopeptidase 1 OS=Homo sapiens GN=XPNPEP1 PE=3 SV=1                                                         | tr G8JLB2 G8JLB2_HUMAN      | 72 kDa  | 2 | 0 | 0 |
| Neuropathy target esterase OS=Homo sapiens GN=PNPLA6 PE=4 SV=1                                                        | REVtr F5H5K9 F5H5K9_HUMAN   | 143 kDa | 0 | 2 | 0 |
| Heterogeneous nuclear ribonucleoprotein Q (Fragment) OS=Homo sapiens GN=SYNCRIP PE=4 SV=1                             | tr F6UXX1 F6UXX1_HUMAN      | 20 kDa  | 0 | 2 | 0 |
| Protein BUD31 homolog OS=Homo sapiens GN=BUD31 PE=4 SV=1                                                              | tr C9JNV2 C9JNV2_HUMAN      | 14 kDa  | 0 | 0 | 2 |
| Protein arginine N-methyltransferase 5 OS=Homo sapiens GN=PRMT5 PE=2 SV=1                                             | tr B4DX49 B4DX49_HUMAN      | 66 kDa  | 2 | 0 | 0 |
| Protein kinase, cAMP-dependent, catalytic, beta OS=Homo sapiens GN=PRKACB PE=2 SV=1                                   | tr B1APG4 B1APG4_HUMAN (+1) | 37 kDa  | 3 | 0 | 2 |
| Signal recognition particle 72 kDa protein OS=Homo sapiens GN=SRP72 PE=4 SV=1                                         | tr G5E9Z8 G5E9Z8_HUMAN      | 68 kDa  | 0 | 0 | 0 |
| 26S protease regulatory subunit 7 (Fragment) OS=Homo sapiens GN=PSMC2 PE=4 SV=1                                       | tr C9JLS9 C9JLS9_HUMAN      | 15 kDa  | 3 | 0 | 0 |
| 40S ribosomal protein S4, X isoform OS=Homo sapiens GN=RPS4X PE=4 SV=1                                                | tr A6NH36 A6NH36_HUMAN      | 14 kDa  | 0 | 2 | 2 |
| T-complex protein 1 subunit alpha OS=Homo sapiens GN=TCP1 PE=3 SV=1                                                   | tr E7ERF2 E7ERF2_HUMAN      | 47 kDa  | 3 | 0 | 0 |
| N-acetyl-D-glucosamine kinase OS=Homo sapiens GN=NAGK PE=4 SV=3                                                       | tr C9JEV6 C9JEV6_HUMAN      | 32 kDa  | 2 | 0 | 0 |
| F-box only protein 3 OS=Homo sapiens GN=FBXO3 PE=4 SV=1                                                               | tr G3V1E0 G3V1E0_HUMAN      | 41 kDa  | 2 | 0 | 0 |
| Pre-B-cell leukemia transcription factor-interacting protein 1 OS=Homo sapiens GN=PBXIP1 PE=4 SV=1                    | tr F5H2F6 F5H2F6_HUMAN      | 65 kDa  | 0 | 0 | 0 |
| 26S proteasome non-ATPase regulatory subunit 7 OS=Homo sapiens GN=PSMD7 PE=2 SV=1                                     | tr B4DXI8 B4DXI8_HUMAN      | 28 kDa  | 2 | 0 | 0 |
| Uncharacterized protein (Fragment) OS=Homo sapiens PE=4 SV=1                                                          | tr HOYHG0 HOYHG0_HUMAN      | 59 kDa  | 0 | 2 | 0 |
| T1-TrpRS (Fragment) OS=Homo sapiens GN=WARS PE=4 SV=1                                                                 | tr HOYJP3 HOYJP3_HUMAN      | 20 kDa  | 2 | 0 | 0 |
| 60S ribosomal protein L30 (Fragment) OS=Homo sapiens GN=RPL30 PE=3 SV=1                                               | tr E5RI99 E5RI99_HUMAN      | 13 kDa  | 0 | 0 | 2 |
| Core-binding factor subunit beta (Fragment) OS=Homo sapiens GN=CBFB PE=4 SV=1                                         | tr H3BSC0 H3BSC0_HUMAN      | 11 kDa  | 0 | 0 | 2 |
| C-terminal-binding protein 1 (Fragment) OS=Homo sapiens GN=CTBP1 PE=3 SV=1                                            | tr D6RAX2 D6RAX2_HUMAN      | 20 kDa  | 2 | 0 | 0 |
| Src family associated phosphoprotein 2, isoform CRA_c OS=Homo sapiens GN=SCAP2 PE=2 SV=1                              | tr B7Z5R3 B7Z5R3_HUMAN      | 22 kDa  | 0 | 0 | 0 |
| 26S proteasome non-ATPase regulatory subunit 6 OS=Homo sapiens GN=PSMD6 PE=4 SV=1                                     | tr C9IZE4 C9IZE4_HUMAN      | 52 kDa  | 2 | 0 | 0 |
| Glucosamine-6-phosphate isomerase 1 OS=Homo sapiens GN=GNPDA1 PE=3 SV=1                                               | tr D6R9P4 D6R9P4_HUMAN (+1) | 31 kDa  | 2 | 0 | 0 |
| S-adenosylmethionine synthase OS=Homo sapiens GN=MAT2A PE=2 SV=1                                                      | tr B4DN45 B4DN45_HUMAN      | 33 kDa  | 2 | 0 | 0 |
| 60S ribosomal protein L23a OS=Homo sapiens GN=RPL23A PE=3 SV=1                                                        | tr A8MUS3 A8MUS3_HUMAN (+1) | 22 kDa  | 0 | 2 | 3 |
| Protein TFG (Fragment) OS=Homo sapiens GN=TFG PE=4 SV=1                                                               | tr C9JJP5 C9JJP5_HUMAN (+1) | 20 kDa  | 2 | 0 | 0 |
| Caspase-3 subunit p12 OS=Homo sapiens GN=CASP3 PE=4 SV=2                                                              | tr A8MVM1 A8MVM1_HUMAN      | 21 kDa  | 2 | 0 | 0 |
| Eukaryotic translation initiation factor 2 subunit 1 (Fragment) OS=Homo sapiens GN=EIF2S1 PE=4 SV=1                   | tr G3V4T5 G3V4T5_HUMAN (+1) | 31 kDa  | 2 | 0 | 0 |
| Exportin-2 OS=Homo sapiens GN=CSE1L PE=2 SV=1                                                                         | tr B4DUC5 B4DUC5_HUMAN      | 85 kDa  | 0 | 0 | 2 |
| 40S ribosomal protein S17 (Fragment) OS=Homo sapiens GN=RPS17 PE=3 SV=1                                               | tr HOYK46 HOYK46_HUMAN (+1) | 22 kDa  | 0 | 0 | 2 |
| Transcription factor EB OS=Homo sapiens GN=TFEB PE=4 SV=1                                                             | tr BQY57 BQY57_HUMAN        | 62 kDa  | 0 | 0 | 0 |
| COP9 signalosome complex subunit 1 OS=Homo sapiens GN=GPS1 PE=4 SV=2                                                  | tr C9JFE4 C9JFE4_HUMAN      | 53 kDa  | 3 | 0 | 0 |
| EF-hand calcium-binding domain-containing protein 5 OS=Homo sapiens GN=EFCAB5 PE=4 SV=1                               | REVtr F5GYL2 F5GYL2_HUMAN   | 99 kDa  | 0 | 0 | 0 |
| Protein LOC100996747 OS=Homo sapiens GN=LOC100996747 PE=4 SV=1                                                        | tr F8VZ7 F8VZ7_HUMAN        | 13 kDa  | 0 | 0 | 2 |
| Ubiquitin-conjugating enzyme E2 N OS=Homo sapiens GN=UBE2N PE=3 SV=1                                                  | tr F8VSD4 F8VSD4_HUMAN (+1) | 12 kDa  | 0 | 2 | 0 |
| Serine/threonine-protein kinase PAK 1 OS=Homo sapiens GN=PAK1 PE=2 SV=1                                               | tr B3KNX7 B3KNX7_HUMAN (+1) | 58 kDa  | 0 | 0 | 0 |

Vacuolar protein sorting-associated protein 26A OS=Homo sapiens GN=VPS26A PE=4 SV=1  
 GMP synthase [glutamine-hydrolyzing] OS=Homo sapiens GN=GMPS PE=4 SV=1  
 6-phosphofructokinase, muscle type (Fragment) OS=Homo sapiens GN=PFKM PE=4 SV=1  
 Protein kinase C and casein kinase substrate in neurons 2 (Fragment) OS=Homo sapiens GN=PACSIN2 PE=4 SV=1  
 Protein transport protein Sec16B OS=Homo sapiens GN=SEC16B PE=4 SV=1  
 Aspartate--tRNA ligase, cytoplasmic (Fragment) OS=Homo sapiens GN=DARS PE=4 SV=1  
 Asparagine--tRNA ligase, cytoplasmic OS=Homo sapiens GN=NARS PE=2 SV=1  
 Unconventional myosin-Ie (Fragment) OS=Homo sapiens GN=MYO1E PE=4 SV=1  
 Annexin (Fragment) OS=Homo sapiens GN=ANXA2 PE=3 SV=1  
 DBIRD complex subunit KIAA1967 (Fragment) OS=Homo sapiens GN=KIAA1967 PE=4 SV=1  
 Orotate phosphoribosyltransferase OS=Homo sapiens GN=UMPS PE=2 SV=1  
 Single Ig IL-1-related receptor OS=Homo sapiens GN=SIGIRR PE=4 SV=1  
 Cysteine--tRNA ligase, cytoplasmic OS=Homo sapiens GN=CARS PE=4 SV=1  
 Coatomer subunit gamma-2 OS=Homo sapiens GN=COPG2 PE=4 SV=1  
 Serine/threonine-protein phosphatase (Fragment) OS=Homo sapiens GN=PPP1CA PE=3 SV=1

|                             |        |   |   |   |
|-----------------------------|--------|---|---|---|
| tr F5H4L7 F5H4L7_HUMAN      | 37 kDa | 3 | 0 | 0 |
| tr F8W720 F8W720_HUMAN      | 66 kDa | 2 | 0 | 0 |
| tr F8VP00 F8VP00_HUMAN      | 19 kDa | 0 | 2 | 0 |
| tr B0QYG7 B0QYG7_HUMAN (+1) | 18 kDa | 2 | 0 | 0 |
| tr E9PK14 E9PK14_HUMAN      | 71 kDa | 0 | 0 | 2 |
| tr C9J7S3 C9J7S3_HUMAN (+1) | 20 kDa | 2 | 0 | 0 |
| tr B4DN60 B4DN60_HUMAN      | 35 kDa | 2 | 0 | 0 |
| tr HOYLE5 HOYLE5_HUMAN      | 22 kDa | 2 | 0 | 0 |
| tr HOYM50 HOYM50_HUMAN      | 28 kDa | 0 | 2 | 0 |
| tr E5RFJ3 E5RFJ3_HUMAN (+2) | 18 kDa | 0 | 0 | 2 |
| tr B5LY68 B5LY68_HUMAN      | 42 kDa | 2 | 0 | 0 |
| tr E9PLI8 E9PLI8_HUMAN      | 26 kDa | 0 | 0 | 0 |
| tr E9PLP0 E9PLP0_HUMAN      | 14 kDa | 2 | 0 | 0 |
| tr F6X838 F6X838_HUMAN      | 28 kDa | 0 | 0 | 2 |
| tr E9PMD7 E9PMD7_HUMAN      | 29 kDa | 2 | 0 | 0 |
